# Supplementary material for: Exploring the expression patterns of palmitoylating and de-palmitoylating enzymes in the mouse brain using the curated RNA-seq database BrainPalmSeq
Source: eLife. 2022 Jul 12;11:e75804. doi: 10.7554/eLife.75804 (PMC9365392; doi:10.7554/eLife.75804)
Supplement: Figure 1—figure supplement 1—source data 3. [file elife-75804-fig1-figsupp1-data3.xlsx]

## Sheet: ZdhhcSpearman_all_cluster_dropv
Figure 1-figure supplement 1-source data 3. Spearman correlation between Zdhhc genes across 565 cell types in DropViz
	Zdhhc1	Zdhhc2	Zdhhc3	Zdhhc4	Zdhhc5	Zdhhc6	Zdhhc7	Zdhhc8	Zdhhc9	Zdhhc11	Zdhhc12	Zdhhc13	Zdhhc14	Zdhhc15	Zdhhc16	Zdhhc17	Zdhhc18	Zdhhc19	Zdhhc20	Zdhhc21	Zdhhc22	Zdhhc23	Zdhhc24	Zdhhc25	Lypla1	Lypla2	Ppt1	Abhd17a	Abhd17b	Abhd17c	Golga7	Golga7b	Selk
Zdhhc1	1	-0.0513343	0.150052	0.0836111	0.281015	0.126084	0.0796989	0.0762251	-0.19251	0.0376979	-0.169058	-0.105289	-0.346113	0.0470913	0.00782525	-0.0652248	0.246305	-0.0661582	-0.0186673	-0.0185027	0.107699	-0.0809748	-0.0860583	0.00387307	0.32448	0.128508	-0.0623495	-0.0132278	-0.259455	-0.0268129	-0.142068	0.0308052	-0.144179
Zdhhc2	-0.0513343	1	0.429976	-0.413046	0.402369	-0.0338623	0.169643	0.595794	0.148125	0	-0.173506	0.43698	0.151228	0.325785	0.261868	0.50557	0.238598	-0.0838059	0.164741	0.628204	0.415738	0.38297	0.251762	0.0472612	-0.195338	0.375021	0.219243	-0.0784667	0.272863	0.11006	-0.343692	0.559462	-0.403202
Zdhhc3	0.150052	0.429976	1	-0.306713	0.572097	0.0391167	0.244292	0.631138	0.0771439	0.0369182	-0.370423	0.404013	-0.0301913	0.282934	0.303091	0.421907	0.368731	-0.0733121	0.157482	0.580053	0.401989	0.252809	0.290851	-0.00464705	0.0557947	0.487794	0.00711244	0.0945203	0.0421553	0.140327	-0.413789	0.588182	-0.542083
Zdhhc4	0.0836111	-0.413046	-0.306713	1	-0.363942	0.113929	-0.0157291	-0.445801	-0.000278549	-0.0296991	0.421726	-0.263501	0.0116977	-0.107814	-0.00383334	-0.460732	-0.176587	0.0866285	-0.186574	-0.551071	-0.267245	-0.142591	-0.15321	-0.0206602	0.0747762	-0.218999	-0.156221	0.236184	-0.0887502	0.0433769	0.416607	-0.43573	0.482213
Zdhhc5	0.281015	0.402369	0.572097	-0.363942	1	0.0448714	0.248327	0.6679	-0.0322832	0.0139429	-0.47772	0.308686	-0.222967	0.231848	0.167398	0.395068	0.44495	-0.0919206	0.29155	0.595161	0.379965	0.106557	0.282295	-0.00981167	0.150309	0.495587	0.0865009	-0.114702	-0.00539679	0.0932734	-0.567617	0.589984	-0.684673
Zdhhc6	0.126084	-0.0338623	0.0391167	0.113929	0.0448714	1	0.108205	-0.0194282	0.0437869	-0.0449409	0.0933168	0.0443035	-0.0264751	0.137566	0.140751	-0.0792062	0.0986516	-0.0198886	-0.0714196	-0.062813	-0.0770692	-0.00591896	0.0476134	0.0260864	0.135397	0.00236243	0.0212112	0.10614	-0.0131962	0.140271	0.09378	-0.0923124	0.0800421
Zdhhc7	0.0796989	0.169643	0.244292	-0.0157291	0.248327	0.108205	1	0.318003	0.0844124	0.0343402	0.00821594	0.16387	0.102614	0.200232	0.17684	0.0774154	0.285017	-0.0639068	0.18177	0.164955	0.0628984	0.153696	0.272139	0.0487992	-0.003777	0.305132	0.0561231	0.166323	0.0274838	0.161624	-0.196172	0.121118	-0.245246
Zdhhc8	0.0762251	0.595794	0.631138	-0.445801	0.6679	-0.0194282	0.318003	1	0.152159	0.0552531	-0.399284	0.496406	0.0465047	0.371116	0.287774	0.566684	0.453662	-0.0603927	0.297094	0.757783	0.464554	0.335812	0.364421	0.00748757	0.00383489	0.472747	0.0215891	0.0294162	0.136587	0.146208	-0.56063	0.741723	-0.745343
Zdhhc9	-0.19251	0.148125	0.0771439	-0.000278549	-0.0322832	0.0437869	0.0844124	0.152159	1	0.0340967	0.253893	0.0923342	0.37179	0.0508966	0.0890526	0.222931	-0.083013	0.126507	0.201682	0.14071	0.0768358	0.184324	0.241117	-0.0359048	-0.242677	-0.037066	0.131981	0.392426	0.39619	0.0667862	0.189861	0.129034	0.0676642
Zdhhc11	0.0376979	0	0.0369182	-0.0296991	0.0139429	-0.0449409	0.0343402	0.0552531	0.0340967	1	0.0212596	0.0144712	0.01369	0.0333591	0.0511465	0.000516345	0.0539728	-0.00695301	0.0160064	0.0689323	-0.0296821	0.0740749	0.0353986	-0.00177305	-0.0379528	0.00361443	0.0154901	-0.0188463	0.0281405	0.0222145	-0.0384734	0.0294949	-0.049052
Zdhhc12	-0.169058	-0.173506	-0.370423	0.421726	-0.47772	0.0933168	0.00821594	-0.399284	0.253893	0.0212596	1	-0.162163	0.287943	0.0103608	-0.00978305	-0.253812	-0.186716	0.116764	-0.0605548	-0.368362	-0.256779	0.137514	-0.0112973	0.0295561	-0.163431	-0.285296	0.00166871	0.282325	0.129803	0.0903189	0.479995	-0.366073	0.481871
Zdhhc13	-0.105289	0.43698	0.404013	-0.263501	0.308686	0.0443035	0.16387	0.496406	0.0923342	0.0144712	-0.162163	1	0.176776	0.323252	0.287366	0.436321	0.204418	-0.0358121	0.138693	0.455529	0.298326	0.320926	0.227203	0.0565927	-0.116008	0.33082	0.0139237	-0.0466978	0.172619	0.294951	-0.27724	0.472163	-0.378377
Zdhhc14	-0.346113	0.151228	-0.0301913	0.0116977	-0.222967	-0.0264751	0.102614	0.0465047	0.37179	0.01369	0.287943	0.176776	1	0.094268	0.0289322	0.173162	-0.112711	0.108869	0.148774	-0.0137474	-0.0197326	0.260893	0.0433356	0.0609591	-0.399749	-0.0916344	0.192577	0.322232	0.379468	0.152058	0.158885	0.0289679	0.129865
Zdhhc15	0.0470913	0.325785	0.282934	-0.107814	0.231848	0.137566	0.200232	0.371116	0.0508966	0.0333591	0.0103608	0.323252	0.094268	1	0.240483	0.252451	0.168582	0.000913361	0.158313	0.313646	0.206031	0.345735	0.182181	0.0338804	-0.00333204	0.189906	-0.0656768	0.0184442	0.112727	0.245627	-0.176188	0.322506	-0.216208
Zdhhc16	0.00782525	0.261868	0.303091	-0.00383334	0.167398	0.140751	0.17684	0.287774	0.0890526	0.0511465	-0.00978305	0.287366	0.0289322	0.240483	1	0.14998	0.128436	-0.0629534	-0.0549333	0.249496	0.22386	0.280535	0.257186	-0.000258316	0.0278218	0.273209	-0.0112127	0.100497	0.046941	0.185736	-0.0659762	0.2798	-0.141938
Zdhhc17	-0.0652248	0.50557	0.421907	-0.460732	0.395068	-0.0792062	0.0774154	0.566684	0.222931	0.000516345	-0.253812	0.436321	0.173162	0.252451	0.14998	1	0.181584	0.0163714	0.22103	0.602865	0.462692	0.330717	0.241182	0.00955239	-0.231995	0.296572	0.094212	0.0583522	0.260624	0.1144	-0.332402	0.603696	-0.394075
Zdhhc18	0.246305	0.238598	0.368731	-0.176587	0.44495	0.0986516	0.285017	0.453662	-0.083013	0.0539728	-0.186716	0.204418	-0.112711	0.168582	0.128436	0.181584	1	-0.0642423	0.285137	0.317314	0.142522	0.142324	0.204469	0.0686926	0.132126	0.384871	-0.0684845	-0.029151	-0.0514764	0.141338	-0.404087	0.313964	-0.497217
Zdhhc19	-0.0661582	-0.0838059	-0.0733121	0.0866285	-0.0919206	-0.0198886	-0.0639068	-0.0603927	0.126507	-0.00695301	0.116764	-0.0358121	0.108869	0.000913361	-0.0629534	0.0163714	-0.0642423	1	0.129488	-0.0785515	-0.0251242	0.0199611	-0.0303099	-0.00695301	-0.0741779	-0.106269	-0.0646779	0.172591	0.0812919	-0.00455991	0.111464	-0.0146884	0.0895216
Zdhhc20	-0.0186673	0.164741	0.157482	-0.186574	0.29155	-0.0714196	0.18177	0.297094	0.201682	0.0160064	-0.0605548	0.138693	0.148774	0.158313	-0.0549333	0.22103	0.285137	0.129488	1	0.16129	0.0855814	0.136058	0.130613	0.0118758	-0.165754	0.150343	0.127905	0.0831773	0.207874	0.12282	-0.249842	0.272952	-0.35596
Zdhhc21	-0.0185027	0.628204	0.580053	-0.551071	0.595161	-0.062813	0.164955	0.757783	0.14071	0.0689323	-0.368362	0.455529	-0.0137474	0.313646	0.249496	0.602865	0.317314	-0.0785515	0.16129	1	0.436603	0.305745	0.326689	-0.0103269	-0.0787315	0.401746	0.137549	-0.0498239	0.236113	0.0724628	-0.472283	0.652084	-0.599081
Zdhhc22	0.107699	0.415738	0.401989	-0.267245	0.379965	-0.0770692	0.0628984	0.464554	0.0768358	-0.0296821	-0.256779	0.298326	-0.0197326	0.206031	0.22386	0.462692	0.142522	-0.0251242	0.0855814	0.436603	1	0.283508	0.156524	0.038054	-0.0373842	0.301016	-0.00390552	-0.0131707	-0.0528421	0.0261543	-0.303341	0.537934	-0.375268
Zdhhc23	-0.0809748	0.38297	0.252809	-0.142591	0.106557	-0.00591896	0.153696	0.335812	0.184324	0.0740749	0.137514	0.320926	0.260893	0.345735	0.280535	0.330717	0.142324	0.0199611	0.136058	0.305745	0.283508	1	0.151869	0.0522078	-0.210649	0.192838	-0.0571916	0.0978401	0.0836652	0.265916	-0.17668	0.394809	-0.195829
Zdhhc24	-0.0860583	0.251762	0.290851	-0.15321	0.282295	0.0476134	0.272139	0.364421	0.241117	0.0353986	-0.0112973	0.227203	0.0433356	0.182181	0.257186	0.241182	0.204469	-0.0303099	0.130613	0.326689	0.156524	0.151869	1	-0.0219626	-0.0350579	0.230961	0.212172	0.0809056	0.323569	0.0710384	-0.0786364	0.206347	-0.208465
Zdhhc25	0.00387307	0.0472612	-0.00464705	-0.0206602	-0.00981167	0.0260864	0.0487992	0.00748757	-0.0359048	-0.00177305	0.0295561	0.0565927	0.0609591	0.0338804	-0.000258316	0.00955239	0.0686926	-0.00695301	0.0118758	-0.0103269	0.038054	0.0522078	-0.0219626	1	-0.0539602	0.0392424	-0.0296894	-0.0263332	-0.037951	0.0457206	-0.041572	0.00879674	-0.0539572
Lypla1	0.32448	-0.195338	0.0557947	0.0747762	0.150309	0.135397	-0.003777	0.00383489	-0.242677	-0.0379528	-0.163431	-0.116008	-0.399749	-0.00333204	0.0278218	-0.231995	0.132126	-0.0741779	-0.165754	-0.0787315	-0.0373842	-0.210649	-0.0350579	-0.0539602	1	0.0998576	-0.195168	-0.155226	-0.390706	-0.117243	-0.0192214	-0.0613686	-0.049398
Lypla2	0.128508	0.375021	0.487794	-0.218999	0.495587	0.00236243	0.305132	0.472747	-0.037066	0.00361443	-0.285296	0.33082	-0.0916344	0.189906	0.273209	0.296572	0.384871	-0.106269	0.150343	0.401746	0.301016	0.192838	0.230961	0.0392424	0.0998576	1	0.0177012	-0.0772527	0.0454385	0.143594	-0.38061	0.484322	-0.46071
Ppt1	-0.0623495	0.219243	0.00711244	-0.156221	0.0865009	0.0212112	0.0561231	0.0215891	0.131981	0.0154901	0.00166871	0.0139237	0.192577	-0.0656768	-0.0112127	0.094212	-0.0684845	-0.0646779	0.127905	0.137549	-0.00390552	-0.0571916	0.212172	-0.0296894	-0.195168	0.0177012	1	-0.0570962	0.371247	0.0152446	0.0180459	-0.015011	0.0124781
Abhd17a	-0.0132278	-0.0784667	0.0945203	0.236184	-0.114702	0.10614	0.166323	0.0294162	0.392426	-0.0188463	0.282325	-0.0466978	0.322232	0.0184442	0.100497	0.0583522	-0.029151	0.172591	0.0831773	-0.0498239	-0.0131707	0.0978401	0.0809056	-0.0263332	-0.155226	-0.0772527	-0.0570962	1	0.141639	-0.00810571	0.225429	0.00888642	0.165178
Abhd17b	-0.259455	0.272863	0.0421553	-0.0887502	-0.00539679	-0.0131962	0.0274838	0.136587	0.39619	0.0281405	0.129803	0.172619	0.379468	0.112727	0.046941	0.260624	-0.0514764	0.0812919	0.207874	0.236113	-0.0528421	0.0836652	0.323569	-0.037951	-0.390706	0.0454385	0.371247	0.141639	1	0.0828761	0.15525	0.057701	0.0359257
Abhd17c	-0.0268129	0.11006	0.140327	0.0433769	0.0932734	0.140271	0.161624	0.146208	0.0667862	0.0222145	0.0903189	0.294951	0.152058	0.245627	0.185736	0.1144	0.141338	-0.00455991	0.12282	0.0724628	0.0261543	0.265916	0.0710384	0.0457206	-0.117243	0.143594	0.0152446	-0.00810571	0.0828761	1	-0.0420248	0.141718	-0.10642
Golga7	-0.142068	-0.343692	-0.413789	0.416607	-0.567617	0.09378	-0.196172	-0.56063	0.189861	-0.0384734	0.479995	-0.27724	0.158885	-0.176188	-0.0659762	-0.332402	-0.404087	0.111464	-0.249842	-0.472283	-0.303341	-0.17668	-0.0786364	-0.041572	-0.0192214	-0.38061	0.0180459	0.225429	0.15525	-0.0420248	1	-0.493499	0.694985
Golga7b	0.0308052	0.559462	0.588182	-0.43573	0.589984	-0.0923124	0.121118	0.741723	0.129034	0.0294949	-0.366073	0.472163	0.0289679	0.322506	0.2798	0.603696	0.313964	-0.0146884	0.272952	0.652084	0.537934	0.394809	0.206347	0.00879674	-0.0613686	0.484322	-0.015011	0.00888642	0.057701	0.141718	-0.493499	1	-0.634902
Selk	-0.144179	-0.403202	-0.542083	0.482213	-0.684673	0.0800421	-0.245246	-0.745343	0.0676642	-0.049052	0.481871	-0.378377	0.129865	-0.216208	-0.141938	-0.394075	-0.497217	0.0895216	-0.35596	-0.599081	-0.375268	-0.195829	-0.208465	-0.0539572	-0.049398	-0.46071	0.0124781	0.165178	0.0359257	-0.10642	0.694985	-0.634902	1
