# Supplementary material for: Exploring the expression patterns of palmitoylating and de-palmitoylating enzymes in the mouse brain using the curated RNA-seq database BrainPalmSeq
Source: eLife. 2022 Jul 12;11:e75804. doi: 10.7554/eLife.75804 (PMC9365392; doi:10.7554/eLife.75804)
Supplement: Figure 1—figure supplement 1—source data 4. [file elife-75804-fig1-figsupp1-data4.xlsx]

## Sheet: Sheet1
Figure 1-figure supplement 1-source data 4: Spearman correlations of S-palmitoylation associated genes vs all other genes across 565 metacells in 'DropViz' dataset (R > 0.7)
Correlated > 0.7 with S-palmitoylation associated protein						Correlated > 0.7 with any Zdhhc
gene1	gene2	R	pval	FDR		676 genes		64 genes		280 genes
Psmb6	Selk	0.86031	6.96E-167	6.10E-161		Correlated with any Zdhhc > 0.7; UniProt Reviewed		Correlated with any Zdhhc> 0.7: Not UniProt reviewed		Correlated with any Zdhhc> 0.7: Uniprot Reviewed, SwissPalm annotated
Smdt1	Selk	0.85215	1.78E-160	7.80E-155		Aak1		1700025G04Rik		Ywhag
Cox6a1	Selk	0.85025	4.86E-159	1.42E-153		Aamdc		1810037I17Rik		Aak1
Psma2	Selk	0.84925	2.74E-158	6.00E-153		Abcc5		1810043H04Rik		Actb
Psmb1	Selk	0.84835	1.27E-157	2.23E-152		Ackr1		2010107E04Rik		Actr1b
Tmem59	Selk	0.84733	7.22E-157	1.06E-151		Actb		4932438A13Rik		Adcy1
Syn1	Golga7b	0.84553	1.49E-155	1.86E-150		Actr1b		5730409E04Rik		Adh5
Psmb2	Selk	0.84340	5.10E-154	5.59E-149		Acvr1b		5730455P16Rik		Agap3
Ndufb11	Selk	0.84154	1.06E-152	1.03E-147		Adam11		9330159F19Rik		Ina
Tmem258	Selk	0.83987	1.59E-151	1.39E-146		Adam22		9930021J03Rik		Ank2
Ndrg3	Golga7b	0.83743	7.70E-150	6.13E-145		Adar		A230006K03Rik		Ankrd17
Adgrl1	Zdhhc8	0.83620	5.35E-149	3.69E-144		Adarb1		A330023F24Rik		Snap91
Scn2a1	Golga7b	0.83618	5.47E-149	3.69E-144		Adcy1		A830039N20Rik		Ap1b1
Kmt2a	Selk	-0.83558	1.41E-148	8.82E-144		Add2		AI314180		Ap3b2
Cadm3	Golga7b	0.83531	2.13E-148	1.24E-143		Adgrb1		AI854703		Ap3d1
Napb	Golga7b	0.83334	4.51E-147	2.47E-142		Adgrb2		Ankrd12		Arf3
Stxbp1	Golga7b	0.83299	7.69E-147	3.96E-142		Adgrl1		B830012L14Rik		Atp2b2
Spcs1	Selk	0.83208	3.11E-146	1.51E-141		Adgrl3		C77370		Atcay
Prdx1	Selk	0.83179	4.80E-146	2.19E-141		Adh5		C78339		Atox1
Dmtn	Golga7b	0.83177	4.99E-146	2.19E-141		Agap3		Chpf2		Atp9a
Pgm2l1	Golga7b	0.83157	6.73E-146	2.81E-141		Agpat1		Fam217b		Atp5j2
Ndufa3	Selk	0.83038	4.06E-145	1.62E-140		Agtpbp1		Fam43b		Atrn
Cwc15	Selk	0.83035	4.29E-145	1.64E-140		Amer3		Gas5		Bean1
Ube2o	Zdhhc8	0.82863	5.57E-144	2.03E-139		Amigo1		Gm10076		Arfgef1
1810037I17Rik	Selk	0.82855	6.29E-144	2.20E-139		Anapc11		Gm10419		Arfgef3
Ndufa7	Selk	0.82783	1.84E-143	6.19E-139		Anapc13		Gm15800		Birc6
Prrt2	Golga7b	0.82703	6.03E-143	1.96E-138		Ank2		Gm16485		Bri3bp
Gnaz	Golga7b	0.82623	1.94E-142	6.08E-138		Ankrd11		Gm2000		Brsk1
Clstn1	Golga7b	0.82613	2.27E-142	6.86E-138		Ankrd13d		Gm37899		Brsk2
Helz	Selk	-0.82601	2.68E-142	7.82E-138		Ankrd17		Gm38393		Bsn
Sep15	Selk	0.82332	1.33E-140	3.77E-136		Ap1b1		Gm9843		Cacna1a
Zbtb7a	Zdhhc8	0.82053	7.18E-139	1.97E-134		Ap3b2		Gtf3c3		Cacna1b
Pgr	Golga7b	0.81997	1.59E-138	4.22E-134		Ap3d1		Hist1h2bc		Cadm3
Fbxo41	Golga7b	0.81956	2.83E-138	7.29E-134		Apba2		Kcnq1ot1		Cadps
Zbtb7a	Selk	-0.81895	6.67E-138	1.63E-133		Apc2		Meg3		Cd81
Tmem256	Selk	0.81895	6.69E-138	1.63E-133		Ar		Miat		Ugcg
Fis1	Selk	0.81778	3.43E-137	8.12E-133		Arf3		Mir124a-1hg		Celf2
Psma7	Selk	0.81756	4.63E-137	1.07E-132		Arfgef1		Mirg		Gm996
Ndufa2	Zdhhc8	-0.81724	7.16E-137	1.61E-132		Arfgef3		Mroh1		Clasp1
Adgrl1	Selk	-0.81570	6.05E-136	1.33E-131		Arhgap26		Nova2		Cluh
Gprin1	Golga7b	0.81449	3.16E-135	6.75E-131		Arhgap32		Peg13		Cnnm1
Rab15	Golga7b	0.81440	3.59E-135	7.50E-131		Arhgap35		RP24-68G17.4		Cntn1
Sptbn2	Golga7b	0.81361	1.05E-134	2.14E-130		Arhgap44		Raph1		Cntnap1
Atxn7l3	Zdhhc8	0.81342	1.35E-134	2.68E-130		Arhgef4		Rian		Cox20
Srp14	Selk	0.81189	1.07E-133	2.09E-129		Ash1l		Snhg11		Cyfip2
Gls	Golga7b	0.81176	1.27E-133	2.43E-129		Atcay		Snhg14		Cstb
Bsn	Golga7b	0.81152	1.76E-133	3.27E-129		Atg2b		Tecpr2		Cst3
Gstp1	Selk	0.81140	2.06E-133	3.76E-129		Atox1		Tmem178b		Dad1
Srpk2	Zdhhc21	0.81117	2.78E-133	4.97E-129		Atp2b2		Zfp644		Dcaf5
Sult4a1	Golga7b	0.81103	3.39E-133	5.93E-129		Atp5e		6430548M08Rik		Dgke
Rps9	Zdhhc8	-0.81097	3.66E-133	6.28E-129		Atp5j2		Adap1		Dagla
Clasp1	Zdhhc8	0.80993	1.45E-132	2.45E-128		Atp5k		Ankrd34a		Disp2
Gm15800	Zdhhc8	0.80979	1.76E-132	2.91E-128		Atp6v0a1		Atp2b3		Dlg4
Dad1	Selk	0.80977	1.80E-132	2.93E-128		Atp8b2		Bptf		Dmxl2
Ptprs	Zdhhc8	0.80973	1.89E-132	3.01E-128		Atp9a		Golga7b		Dnajc5
Ppfia3	Golga7b	0.80951	2.53E-132	3.96E-128		Atrn		Herc1		Adar
Mycbp2	Selk	-0.80945	2.75E-132	4.23E-128		Atxn2		Herc3		Dync1h1
Cox6a1	Zdhhc8	-0.80937	3.06E-132	4.62E-128		Atxn7l3		Lrp3		Dnm1
Krtcap2	Selk	0.80921	3.79E-132	5.63E-128		B3galt2		Mdn1		Dst
Adh5	Selk	0.80896	5.28E-132	7.71E-128		B3gat3		Myl12a		Epb4.1l1
Tmbim4	Selk	0.80894	5.42E-132	7.78E-128		B4galt2		Scn2a1		Ech1
Rnf7	Selk	0.80881	6.43E-132	9.09E-128		B4galt5		Slc2a6		Echs1
Meg3	Zdhhc8	0.80867	7.67E-132	1.07E-127		B4galt6		Sptbn2		Eef1a1
Sh3gl2	Golga7b	0.80822	1.40E-131	1.91E-127		Bean1		Sptbn4		Eef1a2
Eif1	Selk	0.80820	1.44E-131	1.94E-127		Begain		Usp32		Eef1d
Dusp8	Zdhhc8	0.80815	1.53E-131	2.04E-127		Bend6				Eif3f
Svop	Golga7b	0.80794	2.00E-131	2.62E-127		Bicd1				Eif3k
Nktr	Selk	-0.80776	2.53E-131	3.26E-127		Birc6				Epha5
Chgb	Golga7b	0.80711	5.98E-131	7.59E-127		Brd4				Etfb
Bzrap1	Selk	-0.80706	6.35E-131	7.94E-127		Bri3bp				Fam126b
Commd6	Selk	0.80692	7.66E-131	9.46E-127		Brsk1				Fam171a2
Reep2	Zdhhc8	0.80644	1.43E-130	1.74E-126		Brsk2				Fbxo41
Ash1l	Selk	-0.80641	1.48E-130	1.77E-126		Bsn				Fgf12
Atp6v1g1	Selk	0.80616	2.06E-130	2.44E-126		Bzrap1				Fis1
Cdk5r2	Golga7b	0.80609	2.26E-130	2.64E-126		Cabp1				Fth1
Cox4i1	Selk	0.80590	2.86E-130	3.30E-126		Cacna1a				Frrs1l
Sema6b	Zdhhc8	0.80581	3.21E-130	3.66E-126		Cacna1b				Gatsl2
Glg1	Zdhhc8	0.80538	5.65E-130	6.34E-126		Cacnb4				Gnb2l1
Ttc14	Selk	-0.80514	7.68E-130	8.52E-126		Cacng2				Gabrb2
Meg3	Selk	-0.80434	2.15E-129	2.36E-125		Cadm3				Gabrg2
Unc13a	Golga7b	0.80421	2.55E-129	2.75E-125		Cadps				Gfod1
Rundc3a	Golga7b	0.80402	3.25E-129	3.44E-125		Camsap1				Ggt7
Syp	Golga7b	0.80402	3.26E-129	3.44E-125		Camta1				Gls
Edf1	Selk	0.80395	3.55E-129	3.71E-125		Camta2				Gnao1
Sbds	Selk	0.80370	4.89E-129	5.05E-125		Cbx6				Gnaq
Snhg14	Zdhhc8	0.80363	5.33E-129	5.43E-125		Cd81				Gnaz
Actr1b	Zdhhc8	0.80348	6.44E-129	6.49E-125		Cdk10				Gpr162
Snap25	Golga7b	0.80314	9.92E-129	9.88E-125		Cdk5r1				Grik5
Spcs2	Selk	0.80253	2.16E-128	2.12E-124		Cdk5r2				Glg1
Kcnq2	Zdhhc8	0.80253	2.18E-128	2.12E-124		Celf2				H3f3a, H3f3b
Syt4	Golga7b	0.80241	2.51E-128	2.42E-124		Celf3				Hsd17b10
Rplp0	Zdhhc21	-0.80238	2.62E-128	2.50E-124		Celsr2				Htt
Wdr7	Golga7b	0.80212	3.67E-128	3.46E-124		Celsr3				Hmgb1
Rbfox3	Golga7b	0.80139	9.15E-128	8.53E-124		Cend1				Hapln4
Shfm1	Selk	0.80123	1.13E-127	1.04E-123		Cep170b				Huwe1
Unc13a	Zdhhc8	0.80109	1.34E-127	1.23E-123		Chchd1				Eif4g3
Cyb5a	Selk	0.80084	1.84E-127	1.67E-123		Chchd2				Ilk
Sec13	Selk	0.80068	2.24E-127	2.01E-123		Chd5				Impad1
Cmip	Zdhhc8	0.80066	2.29E-127	2.03E-123		Chd8				Inpp4a
Kansl1	Selk	-0.80011	4.60E-127	4.03E-123		Chmp2a				Iqsec3
Pcbp2	Selk	0.79930	1.27E-126	1.10E-122		Chrnb2				Itm2b
Rps5	Zdhhc21	-0.79929	1.28E-126	1.10E-122		Cit				N28178
Dnajc5	Zdhhc8	0.79926	1.33E-126	1.13E-122		Clasp1				Kcnab2
Cstb	Selk	0.79902	1.80E-126	1.52E-122		Clcn4-2				Kcnma1
Snrpd3	Selk	0.79871	2.62E-126	2.19E-122		Clec16a				Kcna2
Rplp0	Zdhhc8	-0.79838	3.95E-126	3.27E-122		Clec2l				Kcnb1
Kcna2	Zdhhc21	0.79813	5.39E-126	4.42E-122		Clstn1				Kcnb2
Eef1a2	Golga7b	0.79804	6.02E-126	4.89E-122		Clstn3				Kcnc3
Rpl22	Zdhhc8	-0.79800	6.36E-126	5.11E-122		Cluh				Kif1a
Ubb	Selk	0.79760	1.04E-125	8.28E-122		Cmip				Klc2
Jph3	Golga7b	0.79747	1.23E-125	9.74E-122		Cmtr1				Prkce
Faim2	Golga7b	0.79705	2.05E-125	1.60E-121		Cnnm1				Laptm4a
Agap3	Golga7b	0.79652	3.97E-125	3.08E-121		Cntn1				Larp1
Myo9a	Zdhhc8	0.79635	4.89E-125	3.76E-121		Cntnap1				Lpgat1
Ankrd17	Zdhhc8	0.79599	7.53E-125	5.74E-121		Commd1				Limk1
Prkar1b	Zdhhc8	0.79597	7.77E-125	5.87E-121		Commd6				Lmtk2
Rab11fip4	Golga7b	0.79592	8.28E-125	6.20E-121		Cox17				Lpcat4
Dnm1	Golga7b	0.79590	8.47E-125	6.29E-121		Cox20				Adgrl3
Camsap1	Zdhhc8	0.79561	1.21E-124	8.90E-121		Cox4i1				Lppr2
Celsr2	Golga7b	0.79541	1.54E-124	1.13E-120		Cox6a1				Lppr5
Slc25a22	Golga7b	0.79511	2.22E-124	1.61E-120		Cox8a				Lrrc7
Kcna2	Zdhhc8	0.79504	2.42E-124	1.74E-120		Cpeb3				Lsm4
Anapc11	Selk	0.79501	2.51E-124	1.79E-120		Cplx1				Map3k12
A830039N20Rik	Golga7b	0.79486	3.01E-124	2.12E-120		Crtc1				Map1a
Pcbp1	Selk	0.79473	3.51E-124	2.46E-120		Csmd1				Map1b
Synj1	Golga7b	0.79453	4.46E-124	3.11E-120		Csrnp3				Map6
Ndufb11	Zdhhc8	-0.79441	5.19E-124	3.58E-120		Cst3				Mast1
Gnaz	Zdhhc8	0.79410	7.52E-124	5.15E-120		Cstb				Mfsd4
Dpm3	Selk	0.79398	8.69E-124	5.90E-120		Cwc15				Micu3
Mrpl33	Selk	0.79362	1.35E-123	9.09E-120		Cx3cl1				Mycbp2
Rps14	Zdhhc8	-0.79344	1.68E-123	1.12E-119		Cyfip2				Myh10
Nat8l	Selk	-0.79326	2.08E-123	1.38E-119		Cyp4x1				Myl6
Kcnq2	Golga7b	0.79322	2.19E-123	1.45E-119		D8ertd738e				Myo5a
Cstb	Zdhhc8	-0.79310	2.53E-123	1.65E-119		Dad1				Naca
Cacna1b	Zdhhc8	0.79309	2.57E-123	1.67E-119		Dagla				Nat8l
Tecpr1	Zdhhc8	0.79303	2.74E-123	1.77E-119		Dbi				Ncam1
Rps3	Zdhhc8	-0.79283	3.51E-123	2.24E-119		Dcaf5				Ncdn
Mapk8ip3	Zdhhc8	0.79264	4.41E-123	2.80E-119		Ddrgk1				Nceh1
Phyhip	Golga7b	0.79224	7.09E-123	4.47E-119		Dennd5b				Ndufa7
Sptbn4	Zdhhc8	0.79221	7.42E-123	4.64E-119		Dgke				Ndufb10
Mycbp2	Zdhhc8	0.79180	1.20E-122	7.47E-119		Dgkq				Nlgn2
Rltpr	Golga7b	0.79176	1.26E-122	7.77E-119		Disp2				Grin2b
Anapc13	Zdhhc8	-0.79168	1.39E-122	8.49E-119		Dlg4				Grin1
Syt13	Golga7b	0.79166	1.43E-122	8.71E-119		Dlgap1				Npc2
Brsk2	Golga7b	0.79151	1.69E-122	1.02E-118		Dmtn				Whsc1
Aamdc	Selk	0.79149	1.76E-122	1.05E-118		Dmxl1				Ogdh
Sel1l	Zdhhc8	0.79134	2.08E-122	1.24E-118		Dmxl2				Oprl1
Psd	Golga7b	0.79132	2.14E-122	1.27E-118		Dnajb14				Pi4k2a
Celf4	Golga7b	0.79101	3.08E-122	1.81E-118		Dnajc19				Paqr9
Nat8l	Zdhhc8	0.79091	3.48E-122	2.03E-118		Dnajc5				Pcbp2
Ube2o	Golga7b	0.79084	3.79E-122	2.20E-118		Dnm1				Pcnxl2
Eif4a3	Selk	0.79056	5.30E-122	3.06E-118		Dock3				P4hb
Rian	Zdhhc8	0.79055	5.34E-122	3.06E-118		Dos				Gbf1
Rps14	Zdhhc21	-0.79025	7.59E-122	4.32E-118		Dpm3				Agpat1
Rbx1	Selk	0.79007	9.42E-122	5.32E-118		Dpp9				Plxna1
Actr1b	Golga7b	0.79002	1.00E-121	5.62E-118		Drap1				Plxna4
Vsnl1	Golga7b	0.78988	1.18E-121	6.58E-118		Dst				Pom121
Herc1	Golga7b	0.78973	1.41E-121	7.83E-118		Dusp8				Ppp3ca
Mycbp2	Golga7b	0.78934	2.23E-121	1.23E-117		Dync1h1				Ppme1
Scn8a	Zdhhc8	0.78929	2.38E-121	1.30E-117		Dzank1				Prrc2c
Btf3	Selk	0.78926	2.45E-121	1.34E-117		Dzip3				Prdx1
Pcna	Selk	0.78828	7.78E-121	4.21E-117		Ech1				Pfn1
Hecw1	Golga7b	0.78820	8.58E-121	4.61E-117		Echs1				Prrt2
Cacna1a	Zdhhc8	0.78815	9.06E-121	4.84E-117		Eef1a1				Psmb1
Glg1	Selk	-0.78801	1.07E-120	5.69E-117		Eef1a2				Psmb6
Taldo1	Selk	0.78799	1.09E-120	5.76E-117		Eef1d				Psd
Psmb3	Selk	0.78799	1.10E-120	5.78E-117		Eif1				Psme2
Chmp2a	Selk	0.78761	1.71E-120	8.92E-117		Eif3f				Ptprs
Dmxl2	Golga7b	0.78751	1.92E-120	9.98E-117		Eif3k				Pttg1ip
Pacsin1	Golga7b	0.78734	2.35E-120	1.21E-116		Eif4g3				Pura
Rer1	Selk	0.78725	2.62E-120	1.34E-116		Elavl4				Purb
Unc80	Zdhhc8	0.78718	2.83E-120	1.44E-116		Elovl4				Uqcrh
Chchd1	Selk	0.78717	2.86E-120	1.45E-116		Epb4.1l1				Rab6a
Tbc1d24	Zdhhc8	0.78710	3.09E-120	1.55E-116		Epha10				Rabl6
Cacna1a	Selk	-0.78710	3.11E-120	1.56E-116		Epha5				Rangap1
Synj1	Zdhhc8	0.78701	3.43E-120	1.71E-116		Epm2aip1				Rab3gap1
Snhg14	Selk	-0.78685	4.13E-120	2.04E-116		Etfb				Rer1
Chchd2	Selk	0.78678	4.51E-120	2.22E-116		Faim2				Arhgap32
Acvr1b	Golga7b	0.78678	4.53E-120	2.22E-116		Fam126b				Arhgap44
Ndufb7	Selk	0.78675	4.67E-120	2.27E-116		Fam134a				Rhoa
Map1b	Zdhhc8	0.78674	4.74E-120	2.30E-116		Fam155a				Rpl13a
Mrpl18	Selk	0.78664	5.31E-120	2.56E-116		Fam160a2				Rpl13
Pianp	Golga7b	0.78653	6.03E-120	2.89E-116		Fam169a				Rpl14
Rplp2	Zdhhc8	-0.78641	6.91E-120	3.29E-116		Fam171a2				Rpl18a
Atp6v1b2	Golga7b	0.78631	7.81E-120	3.70E-116		Fam189a1				Rpl18
Fbxo41	Zdhhc8	0.78592	1.23E-119	5.79E-116		Fam193b				Rpl22
Madd	Golga7b	0.78559	1.78E-119	8.36E-116		Fam20b				Rpl23
Dnajc19	Selk	0.78558	1.80E-119	8.41E-116		Fam219a				Rpl30
Rps21	Zdhhc8	-0.78534	2.39E-119	1.11E-115		Fam73a				Rpl32
Cd81	Selk	0.78533	2.43E-119	1.12E-115		Fbxl19				Rpl34
Nckipsd	Golga7b	0.78514	3.01E-119	1.38E-115		Fbxo33				Rpl35a
Helz	Zdhhc8	0.78510	3.14E-119	1.43E-115		Fbxo41				Rpl36
Arfgef3	Golga7b	0.78502	3.45E-119	1.57E-115		Fcho1				Rpl37a
Brd4	Selk	-0.78499	3.56E-119	1.61E-115		Fgf12				Rpl37
Rps15	Zdhhc21	-0.78494	3.79E-119	1.70E-115		Fis1				Rpl4
Lmtk3	Zdhhc8	0.78484	4.24E-119	1.90E-115		Flywch1				Rpl7
Slirp	Selk	0.78480	4.44E-119	1.97E-115		Frrs1l				Rpl8
Syn1	Zdhhc8	0.78476	4.69E-119	2.07E-115		Fth1				Rplp0
Dos	Golga7b	0.78473	4.85E-119	2.14E-115		Gabarap				Rplp1
Cope	Selk	0.78463	5.41E-119	2.37E-115		Gabbr2				Rnft2
Prkar1b	Golga7b	0.78458	5.75E-119	2.51E-115		Gabra1				Rph3a
Jph3	Zdhhc8	0.78457	5.81E-119	2.52E-115		Gabra3				Rps10
Celf5	Golga7b	0.78451	6.19E-119	2.67E-115		Gabrb2				Rps11
Cox7a2	Selk	0.78444	6.72E-119	2.89E-115		Gabrg2				Rps14
Map2k4	Golga7b	0.78443	6.83E-119	2.92E-115		Gatsl2				Rps19
N28178	Golga7b	0.78441	6.94E-119	2.95E-115		Gbf1				Rps20
Dock3	Golga7b	0.78438	7.22E-119	3.06E-115		Gcc2				Rps21
Nckipsd	Zdhhc8	0.78433	7.65E-119	3.22E-115		Gdap1				Rps24
Prdx1	Zdhhc8	-0.78385	1.33E-118	5.58E-115		Gfod1				Rps25
Pfn1	Zdhhc8	-0.78370	1.58E-118	6.59E-115		Gga3				Rps26
Frrs1l	Golga7b	0.78367	1.64E-118	6.79E-115		Ggt7				Rps27l
Cwc15	Zdhhc8	-0.78351	1.95E-118	8.07E-115		Glg1				Rps28
Rapgefl1	Golga7b	0.78343	2.15E-118	8.85E-115		Gls				Rps2
Matk	Golga7b	0.78338	2.28E-118	9.35E-115		Gltscr1l				Rps3a1
Rps11	Zdhhc8	-0.78315	2.97E-118	1.21E-114		Gm996				Rps3
Mapk8ip2	Golga7b	0.78313	3.01E-118	1.22E-114		Gnao1				Rps4x
Myeov2	Selk	0.78299	3.53E-118	1.43E-114		Gnaq				Rps5
Gabarap	Zdhhc8	-0.78296	3.67E-118	1.47E-114		Gnaz				Rps9
Epha5	Golga7b	0.78279	4.44E-118	1.78E-114		Gnb2l1				Snrpb
Pclo	Zdhhc21	0.78274	4.72E-118	1.88E-114		Gpr162				Rtn3
Brsk2	Zdhhc8	0.78267	5.11E-118	2.03E-114		Gramd1b				Rundc3a
Tbc1d24	Zdhhc21	0.78250	6.23E-118	2.46E-114		Grik5				Slc12a5
Rpl34	Zdhhc8	-0.78243	6.71E-118	2.64E-114		Grin1				Slc23a2
Kcnma1	Golga7b	0.78240	6.97E-118	2.73E-114		Grin2b				Slc45a1
Atp6v0a1	Golga7b	0.78235	7.32E-118	2.84E-114		Grm5				Sacs
Mrps21	Selk	0.78235	7.33E-118	2.84E-114		Gsk3b				Sec61b
Rps5	Zdhhc8	-0.78192	1.19E-117	4.60E-114		Gtf3c6				Scai
Rims1	Golga7b	0.78174	1.46E-117	5.62E-114		H2afv				Scamp5
Rian	Selk	-0.78174	1.47E-117	5.62E-114		H3f3a				Scn8a
Clstn1	Zdhhc8	0.78154	1.84E-117	7.03E-114		H3f3b				Sec13
Gm16485	Golga7b	0.78148	1.97E-117	7.48E-114		Hapln4				Sgip1
Cbx6	Zdhhc8	0.78138	2.20E-117	8.33E-114		Hecw1				Slirp
Rps9	Zdhhc21	-0.78114	2.91E-117	1.09E-113		Helz				Napb
Cmip	Golga7b	0.78111	2.99E-117	1.12E-113		Herc2				Snap25
Map9	Golga7b	0.78102	3.31E-117	1.24E-113		Hist1h1c				Snph
Ywhag	Golga7b	0.78098	3.47E-117	1.29E-113		Hmgb1				Spcs2
Sprn	Golga7b	0.78089	3.82E-117	1.41E-113		Hsd17b10				Nckipsd
Kcnq1ot1	Selk	-0.78082	4.15E-117	1.53E-113		Htt				Srcin1
Rpl4	Zdhhc8	-0.78067	4.89E-117	1.79E-113		Huwe1				Ssr4
Rps10	Zdhhc8	-0.78063	5.13E-117	1.87E-113		Ice1				Stxbp5l
Usp34	Zdhhc8	0.78063	5.15E-117	1.87E-113		Ilk				Stx1b
Rb1cc1	Zdhhc8	0.78061	5.24E-117	1.90E-113		Impad1				Stxbp1
Acvr1b	Zdhhc8	0.78038	6.84E-117	2.46E-113		Ina				Stxbp5
Unc50	Selk	0.78029	7.53E-117	2.71E-113		Inha				Sv2a
Adgrl1	Golga7b	0.78007	9.67E-117	3.46E-113		Inpp4a				Svop
Ube4b	Selk	-0.77999	1.06E-116	3.76E-113		Ints1				Syngap1
Bptf	Selk	-0.77997	1.08E-116	3.82E-113		Iqsec1				Syn1
Hnrnpa2b1	Selk	0.77997	1.09E-116	3.84E-113		Iqsec2				Synj1
Ralyl	Golga7b	0.77966	1.54E-116	5.40E-113		Iqsec3				Syt1
Rb1cc1	Zdhhc21	0.77965	1.54E-116	5.40E-113		Irgq				Syt7
Rtn1	Golga7b	0.77957	1.70E-116	5.94E-113		Itm2b				Taldo1
Kifc2	Golga7b	0.77951	1.81E-116	6.31E-113		Jph3				Tanc2
Rnf165	Golga7b	0.77927	2.37E-116	8.22E-113		Kansl1				Tbc1d24
Larp1	Zdhhc5	0.77908	2.94E-116	1.01E-112		Kcna2				Tecpr1
Klc2	Golga7b	0.77899	3.24E-116	1.11E-112		Kcnab2				Tesk1
Apba2	Golga7b	0.77841	6.20E-116	2.12E-112		Kcnb1				Thy1
Fam126b	Zdhhc21	0.77829	7.07E-116	2.41E-112		Kcnb2				Tmem50a
Syt7	Selk	-0.77824	7.50E-116	2.55E-112		Kcnc3				Tmem59
Kifc2	Zdhhc8	0.77813	8.49E-116	2.86E-112		Kcnj9				Tnpo2
Stx1b	Golga7b	0.77812	8.50E-116	2.86E-112		Kcnma1				Tnpo3
Snap91	Golga7b	0.77810	8.76E-116	2.94E-112		Kcnq2				Ube2m
Rps3a1	Zdhhc8	-0.77801	9.69E-116	3.24E-112		Kif1a				Ube2o
Tmem256	Zdhhc8	-0.77796	1.02E-115	3.39E-112		Kif3a				Ube3a
Basp1	Golga7b	0.77777	1.26E-115	4.17E-112		Kif3c				Ubr4
Sptbn4	Selk	-0.77776	1.27E-115	4.21E-112		Kif5a				Unc13a
Tuba4a	Golga7b	0.77758	1.55E-115	5.10E-112		Kif5c				Usp9x
Fam126b	Zdhhc8	0.77753	1.64E-115	5.39E-112		Kifap3				Vezt
Rpl22	Zdhhc21	-0.77744	1.81E-115	5.93E-112		Kifc2				Vsnl1
Herc1	Zdhhc8	0.77721	2.34E-115	7.61E-112		Klc2				Vkorc1
Prkce	Golga7b	0.77721	2.35E-115	7.61E-112		Kmt2a				Atp6v0a1
Rplp2	Zdhhc21	-0.77694	3.17E-115	1.02E-111		Kmt2d				Wdfy3
Ankrd34a	Golga7b	0.77693	3.21E-115	1.03E-111		Kpna1				Wdr7
Sptbn4	Golga7b	0.77682	3.59E-115	1.15E-111		Krtcap2				Wnk2
Cacna1e	Golga7b	0.77680	3.70E-115	1.18E-111		Ksr2				Xkr4
Pfdn5	Zdhhc8	-0.77678	3.76E-115	1.20E-111		L1cam				Fam20b
Rusc1	Zdhhc8	0.77668	4.19E-115	1.33E-111		Lamp1				Ybx1
Ankrd11	Selk	-0.77661	4.53E-115	1.43E-111		Lamtor2				Zdhhc21
Add2	Golga7b	0.77660	4.59E-115	1.45E-111		Laptm4a				Zdhhc8
Dlg4	Golga7b	0.77653	4.97E-115	1.56E-111		Larp1				Zzef1
4932438A13Rik	Zdhhc8	0.77641	5.67E-115	1.78E-111		Larp4b				Scn1a
Syt1	Golga7b	0.77638	5.84E-115	1.82E-111		Lemd3				Ttc7b
Kmt2a	Zdhhc8	0.77631	6.36E-115	1.98E-111		Lgi2
Mfsd4	Golga7b	0.77614	7.64E-115	2.37E-111		Limk1
Ndufa2	Selk	0.77600	8.93E-115	2.75E-111		Lmtk2
Rangap1	Golga7b	0.77599	8.99E-115	2.77E-111		Lmtk3
Rps20	Zdhhc8	-0.77589	1.00E-114	3.07E-111		Lpcat4
Myo5a	Zdhhc21	0.77580	1.11E-114	3.38E-111		Lpgat1
Atp5c1	Selk	0.77577	1.14E-114	3.48E-111		Lpin2
Rplp1	Zdhhc21	-0.77566	1.30E-114	3.93E-111		Lppr2
Vcpip1	Zdhhc21	0.77536	1.80E-114	5.44E-111		Lppr5
Syt7	Zdhhc8	0.77530	1.91E-114	5.76E-111		Lrfn1
Tomm7	Selk	0.77527	1.98E-114	5.95E-111		Lrfn5
Dbi	Selk	0.77523	2.08E-114	6.23E-111		Lrrc4b
Micu3	Zdhhc21	0.77502	2.59E-114	7.73E-111		Lrrc58
Tub	Golga7b	0.77495	2.82E-114	8.37E-111		Lrrc7
Ap3m2	Golga7b	0.77491	2.95E-114	8.75E-111		Lsm4
Tmem258	Zdhhc8	-0.77481	3.29E-114	9.70E-111		Lynx1
Bzrap1	Zdhhc8	0.77441	5.08E-114	1.49E-110		Madd
Myo9a	Selk	-0.77439	5.17E-114	1.52E-110		Map1a
Tmem59l	Golga7b	0.77436	5.36E-114	1.57E-110		Map1b
Rpl13a	Zdhhc8	-0.77424	6.13E-114	1.79E-110		Map2k4
Tanc2	Selk	-0.77420	6.41E-114	1.86E-110		Map3k10
Ina	Golga7b	0.77417	6.59E-114	1.91E-110		Map3k12
Arfgef1	Zdhhc8	0.77417	6.62E-114	1.91E-110		Map3k9
Grin1	Zdhhc8	0.77416	6.64E-114	1.91E-110		Map6
Rpl26	Zdhhc8	-0.77414	6.82E-114	1.95E-110		Map7d2
Tceb2	Selk	0.77413	6.85E-114	1.96E-110		Map9
Eef1a1	Zdhhc8	-0.77391	8.72E-114	2.48E-110		Mapk10
Pdzd4	Golga7b	0.77376	1.03E-113	2.93E-110		Mapk8
Numbl	Golga7b	0.77375	1.04E-113	2.93E-110		Mapk8ip2
Kif1a	Zdhhc21	0.77361	1.21E-113	3.40E-110		Mapk8ip3
Myl6	Selk	0.77350	1.36E-113	3.83E-110		Mapk9
Atp6v0a1	Zdhhc8	0.77348	1.39E-113	3.89E-110		Mast1
Rhof	Golga7b	0.77348	1.40E-113	3.91E-110		Mast2
Unc80	Golga7b	0.77347	1.42E-113	3.94E-110		Med13l
Adam22	Zdhhc8	0.77335	1.61E-113	4.46E-110		Med28
Rnf157	Golga7b	0.77325	1.80E-113	4.96E-110		Megf8
Rpl34	Zdhhc21	-0.77319	1.91E-113	5.26E-110		Mfn2
Ankrd12	Zdhhc21	0.77311	2.09E-113	5.74E-110		Mfsd4
Ppp3r1	Golga7b	0.77302	2.30E-113	6.31E-110		Mgat3
Pigyl	Selk	0.77297	2.42E-113	6.60E-110		Mgrn1
Lrfn1	Golga7b	0.77293	2.55E-113	6.93E-110		Micu3
Dync1h1	Zdhhc8	0.77282	2.86E-113	7.76E-110		Minos1
Rab6b	Golga7b	0.77265	3.42E-113	9.25E-110		Mrpl17
Cox17	Selk	0.77254	3.86E-113	1.04E-109		Mrpl18
Unc79	Zdhhc8	0.77246	4.21E-113	1.13E-109		Mrpl33
H3f3b	Selk	0.77235	4.76E-113	1.27E-109		Mrps21
Ksr2	Golga7b	0.77231	4.98E-113	1.33E-109		Mtus2
Adar	Zdhhc8	0.77228	5.13E-113	1.37E-109		Mycbp2
Ash1l	Zdhhc8	0.77225	5.31E-113	1.41E-109		Myeov2
Sep15	Zdhhc8	-0.77224	5.36E-113	1.42E-109		Myh10
Peg13	Zdhhc8	0.77222	5.47E-113	1.44E-109		Myl6
Rnf157	Zdhhc8	0.77221	5.49E-113	1.44E-109		Myo5a
Snph	Selk	-0.77216	5.82E-113	1.53E-109		Myo9a
Rexo2	Selk	0.77213	6.03E-113	1.58E-109		N28178
Madd	Zdhhc8	0.77207	6.43E-113	1.68E-109		Naca
Smim10l2a	Golga7b	0.77197	7.15E-113	1.86E-109		Nap1l3
Bud31	Selk	0.77191	7.60E-113	1.97E-109		Napb
Tnpo2	Zdhhc8	0.77183	8.33E-113	2.15E-109		Nat8l
Pfn1	Selk	0.77178	8.75E-113	2.25E-109		Ncam1
C77370	Golga7b	0.77165	1.01E-112	2.59E-109		Ncdn
Dync1i1	Golga7b	0.77162	1.04E-112	2.66E-109		Nceh1
Arhgap44	Golga7b	0.77160	1.07E-112	2.73E-109		Nckap1
Pfdn5	Zdhhc21	-0.77149	1.20E-112	3.05E-109		Nckipsd
Glg1	Zdhhc5	0.77147	1.22E-112	3.09E-109		Ncs1
Smdt1	Zdhhc8	-0.77142	1.30E-112	3.28E-109		Ndrg3
Ogfod1	Golga7b	0.77138	1.35E-112	3.42E-109		Ndufa2
Sacs	Zdhhc8	0.77130	1.46E-112	3.68E-109		Ndufa3
Syf2	Selk	0.77112	1.77E-112	4.45E-109		Ndufa7
Dbi	Zdhhc8	-0.77104	1.94E-112	4.86E-109		Ndufb10
RP24-68G17.4	Zdhhc8	0.77093	2.18E-112	5.45E-109		Ndufb11
D8Ertd738e	Selk	0.77092	2.20E-112	5.49E-109		Ndufb7
Zzef1	Zdhhc8	0.77079	2.55E-112	6.32E-109		Nefh
Cox8a	Selk	0.77073	2.71E-112	6.72E-109		Nf2
Eif3f	Zdhhc21	-0.77072	2.73E-112	6.74E-109		Nktr
Fam171a2	Golga7b	0.77061	3.07E-112	7.55E-109		Nlgn2
Ssr4	Selk	0.77055	3.26E-112	8.01E-109		Nlk
Pum1	Zdhhc8	0.77055	3.29E-112	8.05E-109		Nmt2
Snph	Zdhhc8	0.77042	3.75E-112	9.14E-109		Npc2
Dlgap1	Zdhhc21	0.77042	3.75E-112	9.14E-109		Nrg3
Mir124a-1hg	Zdhhc8	0.77036	4.03E-112	9.78E-109		Nrsn1
Pi4ka	Golga7b	0.77030	4.27E-112	1.03E-108		Nrxn2
Rps3a1	Zdhhc21	-0.77019	4.79E-112	1.16E-108		Nrxn3
Atp9a	Zdhhc8	0.77019	4.83E-112	1.16E-108		Nudcd3
Hpcal4	Golga7b	0.77011	5.23E-112	1.26E-108		Numbl
Camk2b	Golga7b	0.77009	5.38E-112	1.29E-108		Nyap2
Polr2f	Selk	0.77001	5.82E-112	1.39E-108		Ogdh
Pclo	Golga7b	0.77000	5.87E-112	1.40E-108		Ogfod1
Nova2	Zdhhc8	0.76994	6.30E-112	1.50E-108		Oprl1
Pcnxl2	Golga7b	0.76987	6.74E-112	1.60E-108		Osgep
Tmem198	Golga7b	0.76981	7.19E-112	1.70E-108		Ost4
Ncoa7	Golga7b	0.76979	7.34E-112	1.73E-108		P4hb
Eif1	Zdhhc8	-0.76960	9.06E-112	2.13E-108		Pacsin1
Lrfn5	Zdhhc8	0.76953	9.76E-112	2.29E-108		Pak3
Tbc1d24	Golga7b	0.76951	9.95E-112	2.33E-108		Panx2
Ptprn	Golga7b	0.76935	1.17E-111	2.74E-108		Paqr9
Kcnab2	Zdhhc8	0.76932	1.21E-111	2.82E-108		Parp6
Cdk5r1	Golga7b	0.76925	1.31E-111	3.03E-108		Pcbp2
Fbxw7	Golga7b	0.76922	1.35E-111	3.12E-108		Pclo
Rps3	Zdhhc21	-0.76921	1.36E-111	3.14E-108		Pcnxl2
Med13l	Zdhhc8	0.76918	1.40E-111	3.23E-108		Pde4a
Pip4k2b	Zdhhc8	0.76915	1.46E-111	3.36E-108		Pde4dip
Slitrk4	Zdhhc8	0.76906	1.60E-111	3.67E-108		Pdpk1
Ralgapa1	Zdhhc8	0.76901	1.69E-111	3.87E-108		Pdzd4
Gabbr2	Zdhhc21	0.76898	1.74E-111	3.96E-108		Peg3
A330023F24Rik	Selk	-0.76894	1.82E-111	4.14E-108		Pfdn5
Churc1	Selk	0.76893	1.83E-111	4.15E-108		Pfn1
Lamtor2	Zdhhc8	-0.76887	1.96E-111	4.44E-108		Pgm2l1
Dock3	Zdhhc8	0.76881	2.10E-111	4.73E-108		Pgr
AI314180	Selk	-0.76869	2.37E-111	5.33E-108		Phlpp2
Gpr26	Golga7b	0.76865	2.48E-111	5.56E-108		Pi4k2a
Rimbp2	Golga7b	0.76864	2.49E-111	5.57E-108		Pi4ka
Unc80	Selk	-0.76857	2.69E-111	6.01E-108		Pianp
Dpm3	Zdhhc8	-0.76852	2.85E-111	6.33E-108		Pik3ca
Ube3c	Selk	-0.76850	2.89E-111	6.42E-108		Pip4k2b
Rpl39	Zdhhc8	-0.76848	2.98E-111	6.58E-108		Plekha6
Pigp	Selk	0.76844	3.10E-111	6.84E-108		Plxna1
Tmem8b	Zdhhc8	0.76828	3.67E-111	8.07E-108		Plxna4
Scp2	Selk	0.76823	3.84E-111	8.44E-108		Pnma2
Fbxo33	Zdhhc8	0.76814	4.24E-111	9.28E-108		Polr2f
Ksr2	Zdhhc8	0.76807	4.56E-111	9.98E-108		Pom121
Chd5	Golga7b	0.76787	5.67E-111	1.24E-107		Ppfia2
Ppfia2	Golga7b	0.76782	5.93E-111	1.29E-107		Ppfia3
Mapk10	Golga7b	0.76757	7.71E-111	1.67E-107		Ppip5k1
Rps19	Zdhhc21	-0.76754	8.03E-111	1.74E-107		Ppm1k
Rplp1	Zdhhc8	-0.76752	8.19E-111	1.77E-107		Ppme1
Grin1	Golga7b	0.76742	9.05E-111	1.95E-107		Ppp3ca
Arfgef1	Zdhhc21	0.76730	1.03E-110	2.22E-107		Ppp3r1
Ptprn2	Golga7b	0.76705	1.34E-110	2.87E-107		Prdx1
Bsn	Zdhhc8	0.76704	1.35E-110	2.89E-107		Prkar1b
Cep170b	Golga7b	0.76693	1.52E-110	3.23E-107		Prkce
Parp6	Golga7b	0.76692	1.53E-110	3.26E-107		Prrc2b
Gnaq	Golga7b	0.76680	1.74E-110	3.69E-107		Prrc2c
Eif4g3	Zdhhc8	0.76675	1.84E-110	3.89E-107		Prrt2
Ndufa7	Zdhhc8	-0.76668	1.97E-110	4.16E-107		Psd
Pura	Zdhhc8	0.76667	1.99E-110	4.19E-107		Psmb1
Lrfn1	Zdhhc8	0.76662	2.11E-110	4.43E-107		Psmb6
Fam217b	Golga7b	0.76658	2.19E-110	4.58E-107		Psme2
Cyp4x1	Golga7b	0.76654	2.28E-110	4.76E-107		Ptma
Zmat3	Zdhhc8	0.76651	2.36E-110	4.93E-107		Ptpn4
Lppr2	Golga7b	0.76649	2.41E-110	5.01E-107		Ptpn5
H3f3b	Zdhhc8	-0.76635	2.78E-110	5.77E-107		Ptprn
Gabarap	Selk	0.76634	2.82E-110	5.84E-107		Ptprs
Scn8a	Zdhhc21	0.76630	2.93E-110	6.06E-107		Pttg1ip
Rps21	Zdhhc21	-0.76627	3.03E-110	6.25E-107		Pum1
Kcnq2	Selk	-0.76620	3.27E-110	6.73E-107		Pum2
Ndufb9	Selk	0.76605	3.83E-110	7.85E-107		Pura
Rps2	Zdhhc21	-0.76598	4.09E-110	8.38E-107		Purb
Commd1	Selk	0.76593	4.32E-110	8.82E-107		Rab11fip3
Mapk8	Golga7b	0.76572	5.39E-110	1.10E-106		Rab11fip4
L1cam	Golga7b	0.76565	5.77E-110	1.17E-106		Rab3gap1
Ube4b	Zdhhc8	0.76564	5.87E-110	1.19E-106		Rab6a
Vamp2	Golga7b	0.76558	6.25E-110	1.27E-106		Rabl6
Kcnab2	Selk	-0.76555	6.41E-110	1.29E-106		Rai1
Ryr2	Golga7b	0.76551	6.72E-110	1.35E-106		Ralgapa1
Rasgef1a	Golga7b	0.76542	7.37E-110	1.48E-106		Ralgapb
Scai	Zdhhc21	0.76538	7.65E-110	1.53E-106		Rangap1
Camsap1	Golga7b	0.76536	7.81E-110	1.56E-106		Rap1gap2
Dnm1	Zdhhc8	0.76530	8.38E-110	1.67E-106		Rapgefl1
Dlg4	Zdhhc8	0.76529	8.40E-110	1.67E-106		Rb1cc1
Atp5j2	Selk	0.76519	9.33E-110	1.85E-106		Rbfox2
Ube3c	Zdhhc8	0.76514	9.87E-110	1.96E-106		Rbfox3
Dlgap1	Golga7b	0.76509	1.04E-109	2.06E-106		Reep2
Rps20	Zdhhc21	-0.76505	1.08E-109	2.13E-106		Rell2
Wdr89	Zdhhc21	-0.76503	1.11E-109	2.18E-106		Rer1
2010107E04Rik	Selk	0.76495	1.20E-109	2.35E-106		Rgs17
Cyfip2	Golga7b	0.76495	1.20E-109	2.35E-106		Rhoa
Rps26	Zdhhc8	-0.76485	1.33E-109	2.60E-106		Rhof
Gm10419	Golga7b	0.76484	1.35E-109	2.64E-106		Rimbp2
Imp3	Selk	0.76460	1.72E-109	3.36E-106		Rims1
Atp5h	Selk	0.76458	1.76E-109	3.41E-106		Rims4
Kcnj9	Golga7b	0.76456	1.80E-109	3.50E-106		Rnf14
Tenm2	Golga7b	0.76442	2.08E-109	4.03E-106		Rnf157
Nudcd3	Golga7b	0.76417	2.70E-109	5.19E-106		Rnf165
Zfhx2	Selk	-0.76417	2.70E-109	5.19E-106		Rnf220
Trrap	Zdhhc8	0.76381	3.89E-109	7.49E-106		Rnf7
Scn8a	Golga7b	0.76366	4.57E-109	8.77E-106		Rnft2
Chmp5	Selk	0.76347	5.53E-109	1.06E-105		Romo1
Gls	Zdhhc8	0.76341	5.93E-109	1.13E-105		Rph3a
Rps27l	Zdhhc8	-0.76331	6.56E-109	1.25E-105		Rpl13
Pum2	Selk	-0.76329	6.70E-109	1.27E-105		Rpl13a
Rpl8	Zdhhc8	-0.76327	6.86E-109	1.30E-105		Rpl14
Rps4x	Zdhhc8	-0.76321	7.28E-109	1.38E-105		Rpl18
Txndc17	Selk	0.76308	8.28E-109	1.56E-105		Rpl18a
Pfn1	Zdhhc21	-0.76307	8.40E-109	1.58E-105		Rpl22
Myl12a	Zdhhc21	-0.76290	1.00E-108	1.89E-105		Rpl23
Trank1	Golga7b	0.76250	1.51E-108	2.84E-105		Rpl26
Miat	Zdhhc8	0.76247	1.55E-108	2.90E-105		Rpl30
Ank2	Golga7b	0.76241	1.65E-108	3.09E-105		Rpl32
Srcin1	Zdhhc8	0.76237	1.72E-108	3.20E-105		Rpl34
Rtn3	Golga7b	0.76237	1.72E-108	3.20E-105		Rpl35
Ptma	Zdhhc8	-0.76233	1.80E-108	3.33E-105		Rpl35a
Tanc2	Golga7b	0.76232	1.81E-108	3.35E-105		Rpl36
Sep15	Golga7b	-0.76225	1.96E-108	3.62E-105		Rpl37
Tm2d2	Selk	0.76224	1.97E-108	3.63E-105		Rpl37a
Rgs17	Golga7b	0.76224	1.98E-108	3.64E-105		Rpl39
Arf3	Golga7b	0.76221	2.03E-108	3.74E-105		Rpl4
Sult4a1	Zdhhc8	0.76190	2.79E-108	5.11E-105		Rpl41
Phf5a	Selk	0.76179	3.13E-108	5.73E-105		Rpl7
Cpeb3	Zdhhc21	0.76169	3.45E-108	6.30E-105		Rpl8
Ndufb10	Selk	0.76160	3.78E-108	6.89E-105		Rplp0
Meg3	Golga7b	0.76152	4.12E-108	7.49E-105		Rplp1
Gabrb3	Golga7b	0.76151	4.16E-108	7.55E-105		Rplp2
Celf3	Golga7b	0.76147	4.34E-108	7.86E-105		Rps10
Zbtb7a	Zdhhc5	0.76143	4.49E-108	8.12E-105		Rps11
Ankrd17	Zdhhc21	0.76142	4.55E-108	8.21E-105		Rps14
RP24-68G17.4	Golga7b	0.76136	4.87E-108	8.76E-105		Rps15
Gfra4	Golga7b	0.76132	5.04E-108	9.05E-105		Rps18
Pclo	Zdhhc8	0.76121	5.63E-108	1.01E-104		Rps19
Mapk8ip3	Golga7b	0.76107	6.54E-108	1.17E-104		Rps2
Syt4	Zdhhc8	0.76091	7.66E-108	1.37E-104		Rps20
Rpl39	Zdhhc21	-0.76089	7.82E-108	1.39E-104		Rps21
Ndufs6	Selk	0.76085	8.16E-108	1.45E-104		Rps24
Gm37899	Selk	-0.76081	8.47E-108	1.50E-104		Rps25
Pom121	Zdhhc8	0.76072	9.32E-108	1.65E-104		Rps26
Hook1	Golga7b	0.76069	9.61E-108	1.70E-104		Rps27l
AI314180	Zdhhc8	0.76051	1.15E-107	2.03E-104		Rps28
Rpl26	Zdhhc21	-0.76044	1.24E-107	2.18E-104		Rps3
Celsr2	Zdhhc8	0.76043	1.24E-107	2.18E-104		Rps3a1
Vwa5b2	Zdhhc8	0.76034	1.37E-107	2.40E-104		Rps4x
Eno2	Golga7b	0.76033	1.39E-107	2.43E-104		Rps5
Slc4a10	Golga7b	0.76017	1.63E-107	2.84E-104		Rps9
Ncs1	Selk	-0.76014	1.68E-107	2.93E-104		Rptor
Unc13a	Selk	-0.76009	1.77E-107	3.08E-104		Rtn3
Rimbp2	Zdhhc8	0.76000	1.93E-107	3.35E-104		Rufy3
Snhg11	Selk	-0.75997	1.99E-107	3.44E-104		Rundc3a
Megf8	Zdhhc8	0.75989	2.15E-107	3.72E-104		Rusc1
Rpl35a	Zdhhc8	-0.75987	2.20E-107	3.79E-104		Sacs
Gabbr2	Zdhhc8	0.75980	2.36E-107	4.07E-104		Scai
2410015M20Rik	Selk	0.75961	2.87E-107	4.92E-104		Scamp5
Ube2ql1	Golga7b	0.75956	3.02E-107	5.17E-104		Scn1a
2610001J05Rik	Selk	0.75943	3.45E-107	5.90E-104		Scn1b
2010107E04Rik	Zdhhc8	-0.75929	3.98E-107	6.80E-104		Scn8a
Unc80	Zdhhc21	0.75926	4.11E-107	7.01E-104		Scrt1
Zmiz2	Golga7b	0.75922	4.28E-107	7.28E-104		Sec13
Sept3	Golga7b	0.75902	5.22E-107	8.87E-104		Sec61b
Ttbk2	Zdhhc21	0.75899	5.35E-107	9.08E-104		Sel1l
Celf2	Golga7b	0.75898	5.43E-107	9.19E-104		Selk
Atcay	Zdhhc8	0.75897	5.50E-107	9.29E-104		Sema6b
Zmiz2	Zdhhc8	0.75890	5.90E-107	9.95E-104		Sep15
Prrt2	Zdhhc8	0.75872	7.07E-107	1.19E-103		Sept3
Erc2	Golga7b	0.75859	8.01E-107	1.35E-103		Setx
Rps11	Zdhhc21	-0.75855	8.40E-107	1.41E-103		Sgip1
Gm996	Golga7b	0.75851	8.76E-107	1.46E-103		Sgsm1
Ankrd11	Zdhhc8	0.75849	8.89E-107	1.48E-103		Sgtb
Rpl8	Zdhhc21	-0.75847	9.04E-107	1.51E-103		Shank1
2900011O08Rik	Golga7b	0.75847	9.08E-107	1.51E-103		Shc2
Atcay	Golga7b	0.75844	9.31E-107	1.55E-103		Shfm1
Chd8	Selk	-0.75843	9.48E-107	1.57E-103		Slc12a5
Nceh1	Zdhhc8	0.75840	9.70E-107	1.60E-103		Slc23a2
Inha	Zdhhc8	0.75836	1.01E-106	1.67E-103		Slc25a23
Tomm7	Zdhhc8	-0.75833	1.05E-106	1.73E-103		Slc35f1
Atcay	Zdhhc21	0.75827	1.11E-106	1.82E-103		Slc45a1
Slc6a7	Golga7b	0.75826	1.12E-106	1.83E-103		Slc4a3
Rps10	Zdhhc21	-0.75812	1.29E-106	2.11E-103		Slc6a17
Med13l	Selk	-0.75790	1.61E-106	2.64E-103		Slc6a7
Arhgdig	Golga7b	0.75787	1.66E-106	2.71E-103		Slirp
Lmtk2	Zdhhc8	0.75787	1.67E-106	2.71E-103		Slitrk1
Zdhhc21	Zdhhc8	0.75778	1.81E-106	2.94E-103		Slitrk4
Zdhhc8	Zdhhc21	0.75778	1.81E-106	2.94E-103		Smdt1
Dync1h1	Golga7b	0.75773	1.91E-106	3.10E-103		Smg7
N28178	Zdhhc8	0.75771	1.96E-106	3.16E-103		Smim11
Fam193b	Selk	-0.75769	1.99E-106	3.22E-103		Smim13
Rap1gap2	Golga7b	0.75765	2.08E-106	3.34E-103		Snap25
Nf2	Zdhhc8	0.75747	2.49E-106	4.00E-103		Snap91
D130043K22Rik	Golga7b	0.75743	2.57E-106	4.13E-103		Sncb
Reep2	Golga7b	0.75736	2.76E-106	4.43E-103		Snph
Myo9a	Golga7b	0.75732	2.88E-106	4.60E-103		Snrpb
Gabbr2	Golga7b	0.75728	3.00E-106	4.79E-103		Snrpg
Atxn7l3	Golga7b	0.75726	3.07E-106	4.89E-103		Snx6
Pura	Selk	-0.75720	3.24E-106	5.15E-103		Sobp
Atp2b2	Zdhhc8	0.75717	3.34E-106	5.31E-103		Socs7
Ugcg	Zdhhc21	0.75715	3.41E-106	5.41E-103		Soga3
Strbp	Zdhhc21	0.75705	3.77E-106	5.96E-103		Spcs1
Uqcr11	Selk	0.75700	3.97E-106	6.27E-103		Spcs2
Rps9	Selk	0.75697	4.08E-106	6.43E-103		Sppl3
Nicn1	Golga7b	0.75693	4.26E-106	6.70E-103		Sprn
Kif1a	Zdhhc8	0.75681	4.77E-106	7.50E-103		Sptssa
Sgsm1	Golga7b	0.75681	4.79E-106	7.51E-103		Srcin1
Lrrc7	Golga7b	0.75668	5.45E-106	8.53E-103		Srp14
Jakmip2	Golga7b	0.75648	6.66E-106	1.04E-102		Srpk2
Stxbp5l	Golga7b	0.75648	6.69E-106	1.04E-102		Srrm3
Rps26	Zdhhc21	-0.75645	6.89E-106	1.07E-102		Ssr4
Smim13	Golga7b	0.75644	6.91E-106	1.07E-102		Strbp
Slitrk4	Golga7b	0.75643	6.98E-106	1.08E-102		Stx1b
Shank2	Golga7b	0.75634	7.68E-106	1.19E-102		Stxbp1
Gtf3c6	Selk	0.75633	7.73E-106	1.19E-102		Stxbp5
Map6	Golga7b	0.75626	8.29E-106	1.28E-102		Stxbp5l
Bloc1s1	Selk	0.75623	8.55E-106	1.32E-102		Sult4a1
Snhg11	Zdhhc8	0.75618	8.96E-106	1.38E-102		Sv2a
Huwe1	Selk	-0.75618	9.02E-106	1.38E-102		Svop
Uqcrh	Selk	0.75610	9.73E-106	1.49E-102		Syf2
Rps27l	Golga7b	-0.75601	1.06E-105	1.62E-102		Syn1
Pip4k2b	Golga7b	0.75599	1.09E-105	1.66E-102		Syngap1
Clasp1	Selk	-0.75590	1.19E-105	1.82E-102		Syngr1
Tsen34	Selk	0.75582	1.29E-105	1.96E-102		Synj1
Ncs1	Zdhhc8	0.75580	1.32E-105	2.00E-102		Syp
Fth1	Zdhhc21	-0.75576	1.37E-105	2.08E-102		Syt1
Atp2b2	Golga7b	0.75564	1.54E-105	2.33E-102		Syt4
Lancl2	Golga7b	0.75563	1.56E-105	2.35E-102		Syt7
Tnpo2	Zdhhc21	0.75557	1.65E-105	2.48E-102		Taldo1
Ptma	Selk	0.75554	1.70E-105	2.56E-102		Tanc2
Htt	Selk	-0.75551	1.74E-105	2.62E-102		Tango2
Faim2	Zdhhc8	0.75548	1.80E-105	2.70E-102		Taok1
Gnao1	Golga7b	0.75542	1.91E-105	2.87E-102		Tbc1d24
Setx	Zdhhc8	0.75535	2.05E-105	3.07E-102		Tbc1d9
Dusp8	Golga7b	0.75534	2.07E-105	3.09E-102		Tcaf1
Rab3gap1	Zdhhc8	0.75531	2.14E-105	3.19E-102		Tcf20
Mir124a-1hg	Selk	-0.75505	2.75E-105	4.09E-102		Tcf25
Wdr47	Golga7b	0.75490	3.19E-105	4.74E-102		Tecpr1
Rhof	Zdhhc8	0.75486	3.33E-105	4.94E-102		Tef
Cadm3	Zdhhc8	0.75485	3.35E-105	4.96E-102		Tenm2
Adh5	Zdhhc8	-0.75470	3.88E-105	5.74E-102		Tesk1
Rabl6	Zdhhc8	0.75444	5.03E-105	7.43E-102		Thy1
Rnf208	Golga7b	0.75444	5.04E-105	7.43E-102		Tmem127
Agtpbp1	Golga7b	0.75432	5.70E-105	8.38E-102		Tmem169
Atox1	Zdhhc8	-0.75419	6.45E-105	9.47E-102		Tmem179
4932438A13Rik	Zdhhc21	0.75419	6.47E-105	9.48E-102		Tmem198
Cyfip2	Zdhhc8	0.75418	6.50E-105	9.50E-102		Tmem240
Agap3	Zdhhc8	0.75415	6.73E-105	9.83E-102		Tmem25
Pi4ka	Zdhhc21	0.75413	6.87E-105	1.00E-101		Tmem256
Brd4	Zdhhc8	0.75412	6.95E-105	1.01E-101		Tmem258
Paqr9	Golga7b	0.75384	9.09E-105	1.32E-101		Tmem50a
Dpp9	Zdhhc8	0.75384	9.15E-105	1.33E-101		Tmem59
Nptxr	Golga7b	0.75379	9.61E-105	1.39E-101		Tmem8b
Lmtk2	Golga7b	0.75377	9.75E-105	1.41E-101		Tnpo2
Gm996	Zdhhc8	0.75376	9.82E-105	1.42E-101		Tnpo3
Dmtn	Zdhhc8	0.75374	1.01E-104	1.45E-101		Tnrc6c
Hmgb1	Selk	0.75374	1.01E-104	1.45E-101		Tom1l2
Sgtb	Golga7b	0.75369	1.06E-104	1.52E-101		Tomm7
Mast1	Golga7b	0.75357	1.19E-104	1.70E-101		Trank1
Aak1	Golga7b	0.75356	1.20E-104	1.72E-101		Trerf1
L1cam	Zdhhc8	0.75347	1.32E-104	1.88E-101		Trim66
Srrm3	Golga7b	0.75326	1.61E-104	2.30E-101		Trrap
Mal2	Golga7b	0.75319	1.72E-104	2.45E-101		Tsc1
Galnt9	Golga7b	0.75316	1.78E-104	2.53E-101		Tspyl4
Snhg11	Zdhhc5	0.75301	2.06E-104	2.92E-101		Ttbk1
Grik5	Golga7b	0.75299	2.10E-104	2.98E-101		Ttbk2
Hecw1	Zdhhc21	0.75291	2.27E-104	3.21E-101		Ttc3
Nrg3	Golga7b	0.75281	2.50E-104	3.53E-101		Ttc7b
Sema6b	Selk	-0.75280	2.52E-104	3.56E-101		Tub
Rangap1	Zdhhc8	0.75271	2.77E-104	3.90E-101		Txndc17
Scamp5	Zdhhc21	0.75267	2.89E-104	4.06E-101		Ube2m
Pde4a	Golga7b	0.75264	2.95E-104	4.14E-101		Ube2o
Atxn7l3	Zdhhc5	0.75259	3.11E-104	4.36E-101		Ube2ql1
Rps4x	Zdhhc21	-0.75259	3.12E-104	4.36E-101		Ube3a
Pdcd5	Selk	0.75244	3.62E-104	5.05E-101		Ube3c
Dennd5b	Zdhhc8	0.75243	3.64E-104	5.08E-101		Ube4b
Taok1	Zdhhc8	0.75240	3.76E-104	5.23E-101		Ubr3
Gria2	Golga7b	0.75235	3.92E-104	5.45E-101		Ubr4
Rpl35a	Zdhhc21	-0.75231	4.07E-104	5.65E-101		Ubxn1
Rundc3a	Zdhhc8	0.75226	4.29E-104	5.96E-101		Ugcg
Tom1l2	Zdhhc8	0.75219	4.58E-104	6.34E-101		Uhrf1bp1l
Rps3	Selk	0.75213	4.89E-104	6.76E-101		Unc13a
Camta2	Golga7b	0.75212	4.94E-104	6.81E-101		Unc79
Dos	Zdhhc8	0.75210	5.00E-104	6.89E-101		Unc80
Snph	Golga7b	0.75210	5.04E-104	6.93E-101		Uqcr10
Mapk8	Zdhhc21	0.75207	5.16E-104	7.09E-101		Uqcr11
Etfb	Golga7b	-0.75205	5.26E-104	7.21E-101		Uqcrh
Unc79	Selk	-0.75202	5.43E-104	7.43E-101		Use1
Sv2a	Zdhhc21	0.75198	5.65E-104	7.72E-101		Usp13
Sncb	Golga7b	0.75196	5.73E-104	7.83E-101		Usp34
Zer1	Zdhhc8	0.75194	5.85E-104	7.97E-101		Usp7
Dock3	Zdhhc21	0.75194	5.89E-104	8.02E-101		Usp9x
Celf2	Selk	-0.75192	5.99E-104	8.13E-101		Vcpip1
Ttc3	Zdhhc21	0.75174	7.12E-104	9.66E-101		Vezt
Nf2	Selk	-0.75170	7.37E-104	9.99E-101		Vkorc1
Pde4a	Zdhhc8	0.75169	7.51E-104	1.02E-100		Vps13a
Ube2o	Zdhhc21	0.75168	7.58E-104	1.02E-100		Vps13b
Rps14	Selk	0.75161	8.06E-104	1.09E-100		Vsnl1
Grin2a	Golga7b	0.75153	8.74E-104	1.18E-100		Vwa5b2
Snapc5	Selk	0.75148	9.21E-104	1.24E-100		Wasf2
Gm8797	Selk	0.75147	9.24E-104	1.24E-100		Wdfy3
Cdkl2	Golga7b	0.75142	9.72E-104	1.30E-100		Wdr7
Ensa	Golga7b	0.75141	9.81E-104	1.31E-100		Wdr89
Fam217b	Zdhhc8	0.75133	1.07E-103	1.42E-100		Whsc1
Anapc13	Selk	0.75122	1.18E-103	1.57E-100		Wipf2
Helz	Zdhhc5	0.75115	1.27E-103	1.69E-100		Wnk2
Napg	Golga7b	0.75110	1.33E-103	1.77E-100		Wnk3
Mrps18c	Selk	0.75108	1.36E-103	1.81E-100		Xkr4
Tanc2	Zdhhc8	0.75102	1.43E-103	1.90E-100		Ybx1
Syngr1	Golga7b	0.75099	1.47E-103	1.95E-100		Ylpm1
Ict1	Selk	0.75093	1.57E-103	2.07E-100		Ypel4
Mrpl17	Selk	0.75093	1.57E-103	2.07E-100		Ywhag
Larp1	Selk	-0.75088	1.65E-103	2.17E-100		Zbtb4
Rpl32	Zdhhc8	-0.75087	1.66E-103	2.18E-100		Zbtb7a
Gigyf1	Selk	-0.75086	1.68E-103	2.20E-100		Zc3h13
Nat8l	Golga7b	0.75067	2.01E-103	2.64E-100		Zdhhc21
Banf1	Selk	0.75066	2.03E-103	2.66E-100		Zdhhc8
Fam155a	Golga7b	0.75063	2.09E-103	2.73E-100		Zer1
Ccdc177	Golga7b	0.75061	2.14E-103	2.79E-100		Zfhx2
Adam22	Golga7b	0.75059	2.17E-103	2.83E-100		Zmat3
Gm37899	Zdhhc8	0.75048	2.43E-103	3.17E-100		Zmiz2
Kmt2d	Selk	-0.75047	2.45E-103	3.18E-100		Zmym2
D8Ertd738e	Zdhhc8	-0.75039	2.65E-103	3.44E-100		Zranb1
Gpr162	Golga7b	0.75028	2.93E-103	3.80E-100		Zyg11b
Flywch1	Golga7b	0.75028	2.96E-103	3.83E-100		Zzef1
Ids	Golga7b	0.75021	3.15E-103	4.07E-100
Map1b	Golga7b	0.75016	3.29E-103	4.25E-100
Hk1	Golga7b	0.75006	3.63E-103	4.67E-100
Ankrd13d	Zdhhc8	0.74995	4.05E-103	5.22E-100
Hecw1	Zdhhc8	0.74989	4.30E-103	5.53E-100
Lin7b	Golga7b	0.74980	4.69E-103	6.02E-100
Rnft2	Zdhhc8	0.74964	5.44E-103	6.97E-100
4932438A13Rik	Selk	-0.74964	5.45E-103	6.97E-100
Anapc11	Zdhhc8	-0.74959	5.72E-103	7.31E-100
Eif4g3	Zdhhc21	0.74957	5.87E-103	7.48E-100
Clstn2	Golga7b	0.74953	6.08E-103	7.75E-100
Ap1b1	Selk	-0.74952	6.13E-103	7.79E-100
Arhgef9	Golga7b	0.74949	6.32E-103	8.03E-100
Gm15800	Selk	-0.74946	6.49E-103	8.23E-100
Eef1a1	Zdhhc21	-0.74941	6.79E-103	8.60E-100
Epha5	Zdhhc8	0.74941	6.83E-103	8.63E-100
Chd5	Zdhhc8	0.74935	7.21E-103	9.11E-100
Ankrd12	Zdhhc8	0.74935	7.26E-103	9.15E-100
Megf8	Selk	-0.74926	7.84E-103	9.87E-100
Cyp4x1	Zdhhc8	0.74926	7.91E-103	9.94E-100
Dad1	Zdhhc8	-0.74919	8.41E-103	1.06E-99
Rpl13a	Zdhhc21	-0.74918	8.47E-103	1.06E-99
Atp6v1c1	Golga7b	0.74918	8.51E-103	1.07E-99
Dnajc5	Zdhhc21	0.74914	8.88E-103	1.11E-99
9330159F19Rik	Golga7b	0.74903	9.85E-103	1.23E-99
Madd	Zdhhc21	0.74901	1.01E-102	1.25E-99
5730455P16Rik	Zdhhc8	0.74899	1.02E-102	1.27E-99
Agap2	Golga7b	0.74898	1.04E-102	1.29E-99
Add2	Zdhhc8	0.74895	1.06E-102	1.32E-99
Tmem178b	Zdhhc8	0.74894	1.08E-102	1.33E-99
Pcsk2	Golga7b	0.74890	1.11E-102	1.37E-99
Cacng2	Zdhhc8	0.74881	1.21E-102	1.50E-99
Akap6	Golga7b	0.74878	1.25E-102	1.55E-99
Tmem25	Zdhhc21	0.74875	1.28E-102	1.58E-99
Snap91	Zdhhc21	0.74866	1.40E-102	1.72E-99
Vkorc1	Selk	0.74859	1.50E-102	1.84E-99
Ttc3	Golga7b	0.74858	1.51E-102	1.85E-99
Slc2a3	Golga7b	0.74853	1.59E-102	1.95E-99
Rgs17	Zdhhc8	0.74852	1.61E-102	1.97E-99
Cmtr1	Zdhhc8	0.74851	1.62E-102	1.98E-99
Sec61b	Selk	0.74848	1.66E-102	2.03E-99
Sept3	Zdhhc21	0.74848	1.66E-102	2.03E-99
Sppl3	Zdhhc8	0.74842	1.77E-102	2.15E-99
Rps28	Zdhhc8	-0.74833	1.92E-102	2.33E-99
Ube2o	Selk	-0.74829	2.00E-102	2.43E-99
Tecpr1	Golga7b	0.74825	2.08E-102	2.52E-99
Kif5c	Golga7b	0.74817	2.24E-102	2.71E-99
Impad1	Zdhhc21	0.74815	2.29E-102	2.77E-99
Dcaf5	Zdhhc8	0.74814	2.30E-102	2.78E-99
Kcnab2	Golga7b	0.74813	2.32E-102	2.80E-99
Syt7	Golga7b	0.74812	2.35E-102	2.83E-99
Scn1a	Zdhhc21	0.74809	2.42E-102	2.91E-99
Rps15	Zdhhc8	-0.74795	2.77E-102	3.33E-99
Meg3	Zdhhc5	0.74793	2.84E-102	3.40E-99
Scn1b	Golga7b	0.74791	2.88E-102	3.45E-99
Dnajc5	Selk	-0.74787	2.99E-102	3.58E-99
Gabrg2	Golga7b	0.74786	3.01E-102	3.59E-99
Uqcrh	Zdhhc8	-0.74784	3.08E-102	3.67E-99
Mrpl55	Selk	0.74784	3.08E-102	3.67E-99
Myt1l	Golga7b	0.74776	3.32E-102	3.95E-99
Rps27l	Selk	0.74766	3.66E-102	4.34E-99
Lmtk3	Golga7b	0.74763	3.76E-102	4.46E-99
Arhgap26	Golga7b	0.74763	3.78E-102	4.47E-99
Ywhag	Zdhhc8	0.74750	4.27E-102	5.04E-99
Eif3i	Selk	0.74738	4.79E-102	5.66E-99
Clstn3	Zdhhc21	0.74733	5.00E-102	5.89E-99
Celsr2	Zdhhc21	0.74732	5.05E-102	5.95E-99
Larp4b	Zdhhc8	0.74722	5.54E-102	6.52E-99
Srrm3	Zdhhc8	0.74712	6.10E-102	7.16E-99
Zyg11b	Golga7b	0.74711	6.16E-102	7.23E-99
Rpl37a	Zdhhc21	-0.74709	6.31E-102	7.40E-99
Dnajc5	Golga7b	0.74707	6.40E-102	7.49E-99
Rpl4	Zdhhc21	-0.74707	6.43E-102	7.51E-99
Cacng2	Selk	-0.74703	6.68E-102	7.80E-99
Sec61b	Zdhhc8	-0.74700	6.87E-102	8.01E-99
Map7d2	Zdhhc21	0.74690	7.54E-102	8.77E-99
Atox1	Selk	0.74690	7.58E-102	8.81E-99
Ptprs	Zdhhc21	0.74682	8.14E-102	9.45E-99
Kif3a	Zdhhc21	0.74679	8.40E-102	9.73E-99
Vcpip1	Zdhhc8	0.74674	8.82E-102	1.02E-98
Pacsin1	Zdhhc8	0.74666	9.46E-102	1.09E-98
Bsn	Zdhhc21	0.74666	9.50E-102	1.10E-98
Ndufs5	Selk	0.74656	1.05E-101	1.21E-98
Klc2	Zdhhc8	0.74648	1.13E-101	1.30E-98
Syngap1	Golga7b	0.74646	1.15E-101	1.32E-98
Adar	Selk	-0.74644	1.16E-101	1.34E-98
Tub	Zdhhc8	0.74640	1.21E-101	1.39E-98
Olfm1	Golga7b	0.74640	1.21E-101	1.39E-98
Gabra1	Zdhhc21	0.74638	1.24E-101	1.42E-98
Atp8b2	Selk	-0.74630	1.33E-101	1.52E-98
Actl6b	Golga7b	0.74627	1.37E-101	1.56E-98
Kdm2a	Selk	-0.74623	1.43E-101	1.62E-98
Ddrgk1	Selk	0.74621	1.45E-101	1.66E-98
Tmem59	Zdhhc8	-0.74607	1.66E-101	1.89E-98
Stmn2	Golga7b	0.74604	1.72E-101	1.95E-98
Klc1	Golga7b	0.74599	1.80E-101	2.04E-98
Pi4ka	Zdhhc8	0.74595	1.86E-101	2.10E-98
Cmip	Zdhhc21	0.74594	1.88E-101	2.13E-98
Ap3b2	Golga7b	0.74581	2.12E-101	2.39E-98
Lamtor2	Selk	0.74578	2.18E-101	2.46E-98
Ndufa13	Selk	0.74578	2.20E-101	2.47E-98
Tango2	Zdhhc8	0.74576	2.23E-101	2.51E-98
Slc45a1	Zdhhc21	0.74572	2.32E-101	2.61E-98
Rims1	Zdhhc21	0.74569	2.38E-101	2.67E-98
Atxn7l3	Zdhhc21	0.74551	2.82E-101	3.16E-98
Rnf14	Golga7b	0.74548	2.90E-101	3.25E-98
Snhg14	Zdhhc21	0.74546	2.96E-101	3.31E-98
Ywhah	Golga7b	0.74540	3.12E-101	3.48E-98
Gatsl2	Zdhhc8	0.74539	3.17E-101	3.54E-98
Selk	Zdhhc8	-0.74534	3.31E-101	3.68E-98
Zdhhc8	Selk	-0.74534	3.31E-101	3.68E-98
Hadha	Golga7b	-0.74528	3.51E-101	3.90E-98
Bcap31	Selk	0.74522	3.71E-101	4.11E-98
Fam134a	Golga7b	0.74522	3.73E-101	4.13E-98
Scn2a1	Zdhhc8	0.74517	3.90E-101	4.32E-98
Cbx6	Selk	-0.74517	3.90E-101	4.32E-98
Rpl13	Zdhhc21	-0.74514	4.01E-101	4.43E-98
Amer3	Golga7b	0.74502	4.50E-101	4.96E-98
Ggt7	Zdhhc8	0.74498	4.67E-101	5.14E-98
Etfb	Zdhhc8	-0.74498	4.68E-101	5.15E-98
Syngr3	Golga7b	0.74494	4.84E-101	5.32E-98
Snhg14	Golga7b	0.74486	5.21E-101	5.72E-98
Aak1	Zdhhc21	0.74484	5.31E-101	5.81E-98
Ubxn1	Selk	0.74479	5.56E-101	6.08E-98
Rpl41	Zdhhc21	-0.74478	5.64E-101	6.16E-98
Usp13	Zdhhc8	0.74476	5.74E-101	6.27E-98
Brsk2	Zdhhc21	0.74472	5.94E-101	6.48E-98
Usp32	Zdhhc21	0.74463	6.46E-101	7.03E-98
Asphd1	Golga7b	0.74447	7.53E-101	8.19E-98
Rnf7	Zdhhc8	-0.74442	7.93E-101	8.61E-98
Ppp3ca	Golga7b	0.74434	8.54E-101	9.25E-98
Gm10076	Zdhhc21	-0.74434	8.54E-101	9.25E-98
Gpr162	Zdhhc8	0.74434	8.55E-101	9.25E-98
Tcf20	Zdhhc8	0.74429	8.92E-101	9.64E-98
Syt1	Zdhhc21	0.74429	8.93E-101	9.64E-98
Rbbp4	Selk	0.74422	9.58E-101	1.03E-97
Gm15800	Golga7b	0.74422	9.58E-101	1.03E-97
Unc5a	Golga7b	0.74421	9.59E-101	1.03E-97
Psd3	Golga7b	0.74416	1.01E-100	1.09E-97
Dgke	Golga7b	0.74409	1.08E-100	1.16E-97
Neurl1a	Golga7b	0.74404	1.13E-100	1.21E-97
Mrps28	Selk	0.74401	1.16E-100	1.24E-97
Pura	Zdhhc5	0.74401	1.16E-100	1.24E-97
Lsm4	Selk	0.74400	1.17E-100	1.25E-97
Unc79	Golga7b	0.74398	1.20E-100	1.27E-97
Cadps	Zdhhc21	0.74384	1.36E-100	1.45E-97
Ypel4	Zdhhc21	0.74372	1.52E-100	1.62E-97
Clstn1	Zdhhc21	0.74371	1.54E-100	1.64E-97
Fam219a	Zdhhc21	0.74369	1.58E-100	1.67E-97
Bptf	Zdhhc8	0.74364	1.65E-100	1.75E-97
Gdap1	Golga7b	0.74361	1.70E-100	1.80E-97
Negr1	Golga7b	0.74360	1.71E-100	1.80E-97
B4galnt1	Golga7b	0.74358	1.74E-100	1.84E-97
Cyfip2	Zdhhc21	0.74354	1.81E-100	1.91E-97
Lrp3	Zdhhc8	0.74350	1.88E-100	1.98E-97
Slc6a17	Zdhhc8	0.74349	1.90E-100	1.99E-97
Tmem8b	Golga7b	0.74348	1.90E-100	2.00E-97
Ep300	Selk	-0.74345	1.96E-100	2.06E-97
Atp5j	Selk	0.74344	1.99E-100	2.09E-97
Map1b	Zdhhc21	0.74333	2.20E-100	2.30E-97
Commd6	Zdhhc8	-0.74333	2.21E-100	2.31E-97
Fbxl16	Golga7b	0.74332	2.22E-100	2.31E-97
Prrc2b	Golga7b	0.74328	2.30E-100	2.40E-97
Rplp2	Selk	0.74328	2.31E-100	2.40E-97
Nsf	Golga7b	0.74326	2.34E-100	2.44E-97
Med28	Zdhhc21	-0.74322	2.43E-100	2.53E-97
Slc2a6	Zdhhc8	0.74313	2.65E-100	2.75E-97
Adgrb1	Zdhhc8	0.74312	2.67E-100	2.77E-97
Cacna1b	Golga7b	0.74311	2.69E-100	2.79E-97
Gramd1b	Golga7b	0.74310	2.74E-100	2.83E-97
Tmem50a	Selk	0.74306	2.84E-100	2.94E-97
Ptpn4	Zdhhc21	0.74295	3.15E-100	3.25E-97
Mrpl33	Zdhhc8	-0.74285	3.44E-100	3.55E-97
Larp1	Zdhhc8	0.74278	3.67E-100	3.78E-97
Rapgefl1	Zdhhc8	0.74278	3.67E-100	3.78E-97
BC031181	Selk	0.74271	3.95E-100	4.05E-97
Chpf2	Zdhhc8	0.74269	4.01E-100	4.12E-97
Prrc2c	Zdhhc21	0.74268	4.04E-100	4.14E-97
Immp1l	Selk	0.74267	4.08E-100	4.18E-97
Tmem151b	Golga7b	0.74266	4.10E-100	4.19E-97
Pum1	Golga7b	0.74262	4.27E-100	4.37E-97
Hsd17b10	Selk	0.74249	4.83E-100	4.93E-97
Scai	Golga7b	0.74236	5.42E-100	5.52E-97
Camta1	Golga7b	0.74235	5.48E-100	5.58E-97
Cacna1a	Golga7b	0.74235	5.50E-100	5.60E-97
Rpl36al	Selk	0.74233	5.59E-100	5.68E-97
Atp5e	Zdhhc8	-0.74227	5.91E-100	5.99E-97
Stx1b	Zdhhc8	0.74226	5.97E-100	6.05E-97
Pgm2l1	Zdhhc8	0.74225	6.05E-100	6.12E-97
Ralgapb	Zdhhc8	0.74224	6.07E-100	6.14E-97
Tmem179	Golga7b	0.74224	6.09E-100	6.15E-97
Ttc9b	Golga7b	0.74223	6.12E-100	6.17E-97
Cacna1a	Zdhhc5	0.74220	6.30E-100	6.34E-97
Vopp1	Golga7b	0.74220	6.31E-100	6.35E-97
Rusc1	Zdhhc5	0.74220	6.35E-100	6.38E-97
Dennd5b	Golga7b	0.74218	6.47E-100	6.49E-97
Oprl1	Golga7b	0.74217	6.48E-100	6.50E-97
Ndufb10	Zdhhc8	-0.74212	6.81E-100	6.82E-97
Ugcg	Zdhhc8	0.74206	7.23E-100	7.23E-97
Herc3	Zdhhc21	0.74205	7.26E-100	7.25E-97
Rab3gap1	Golga7b	0.74202	7.47E-100	7.46E-97
Dmxl2	Zdhhc21	0.74184	8.84E-100	8.81E-97
Diras2	Golga7b	0.74178	9.37E-100	9.34E-97
Dnm1	Zdhhc21	0.74177	9.45E-100	9.40E-97
Ube2m	Zdhhc8	0.74175	9.64E-100	9.58E-97
Atg2b	Golga7b	0.74174	9.66E-100	9.59E-97
Rell2	Zdhhc8	0.74173	9.75E-100	9.66E-97
Golga7b	Zdhhc8	0.74172	9.85E-100	9.74E-97
Zdhhc8	Golga7b	0.74172	9.85E-100	9.74E-97
Amph	Golga7b	0.74165	1.06E-99	1.04E-96
Map2k4	Zdhhc8	0.74165	1.06E-99	1.05E-96
Mef2d	Golga7b	0.74160	1.10E-99	1.08E-96
Grin1	Selk	-0.74158	1.13E-99	1.11E-96
Flywch1	Zdhhc8	0.74154	1.17E-99	1.15E-96
Dmxl2	Zdhhc8	0.74148	1.24E-99	1.21E-96
Tmem130	Golga7b	0.74147	1.25E-99	1.22E-96
Apba2	Zdhhc8	0.74146	1.26E-99	1.23E-96
Ppp1r9a	Golga7b	0.74145	1.27E-99	1.24E-96
Slc12a5	Golga7b	0.74144	1.28E-99	1.25E-96
Kif5c	Zdhhc21	0.74144	1.29E-99	1.26E-96
5730455P16Rik	Zdhhc21	0.74139	1.34E-99	1.31E-96
Fam160a2	Golga7b	0.74135	1.39E-99	1.36E-96
Aurkaip1	Selk	0.74131	1.44E-99	1.40E-96
Sema6b	Golga7b	0.74128	1.49E-99	1.45E-96
Pura	Zdhhc21	0.74127	1.50E-99	1.46E-96
Atp2b2	Zdhhc21	0.74116	1.66E-99	1.61E-96
Cdk5r1	Zdhhc8	0.74115	1.67E-99	1.62E-96
Sf3b5	Selk	0.74108	1.79E-99	1.73E-96
Herc2	Zdhhc8	0.74107	1.81E-99	1.75E-96
Ank2	Zdhhc8	0.74105	1.84E-99	1.78E-96
Snhg11	Golga7b	0.74097	1.99E-99	1.92E-96
Ppp2r2c	Golga7b	0.74091	2.10E-99	2.03E-96
Bri3bp	Zdhhc21	0.74090	2.11E-99	2.03E-96
Ypel4	Zdhhc8	0.74083	2.26E-99	2.17E-96
Rnf220	Golga7b	0.74080	2.33E-99	2.24E-96
Ost4	Selk	0.74078	2.37E-99	2.28E-96
Mir124a-1hg	Golga7b	0.74068	2.60E-99	2.49E-96
1810022K09Rik	Selk	0.74062	2.75E-99	2.63E-96
Sphkap	Golga7b	0.74050	3.05E-99	2.92E-96
Srcin1	Golga7b	0.74048	3.12E-99	2.98E-96
Eef1d	Zdhhc21	-0.74046	3.18E-99	3.04E-96
Cntnap1	Zdhhc8	0.74036	3.48E-99	3.32E-96
Nrxn2	Zdhhc8	0.74033	3.58E-99	3.41E-96
Rusc1	Golga7b	0.74029	3.72E-99	3.54E-96
Atl1	Golga7b	0.74013	4.32E-99	4.11E-96
Rps28	Zdhhc21	-0.74012	4.35E-99	4.13E-96
Gfod1	Zdhhc8	0.74010	4.44E-99	4.21E-96
Tcf25	Zdhhc21	0.74009	4.47E-99	4.23E-96
Commd1	Zdhhc8	-0.74008	4.50E-99	4.26E-96
Eif3d	Selk	0.74006	4.58E-99	4.33E-96
Fam43b	Golga7b	0.74002	4.79E-99	4.52E-96
Tcf25	Golga7b	0.74000	4.87E-99	4.59E-96
Chd5	Zdhhc21	0.73997	4.97E-99	4.68E-96
Cacnb1	Golga7b	0.73980	5.85E-99	5.50E-96
Rpl23	Zdhhc8	-0.73975	6.14E-99	5.77E-96
Cdk5r2	Zdhhc8	0.73975	6.14E-99	5.77E-96
Ypel4	Golga7b	0.73971	6.37E-99	5.97E-96
Gpr22	Golga7b	0.73968	6.50E-99	6.10E-96
Pcbp2	Zdhhc8	-0.73962	6.88E-99	6.44E-96
Zwint	Golga7b	0.73955	7.32E-99	6.85E-96
Zdbf2	Golga7b	0.73952	7.58E-99	7.08E-96
Ubr4	Selk	-0.73944	8.10E-99	7.55E-96
Eif3k	Selk	0.73944	8.10E-99	7.55E-96
Gm15800	Zdhhc21	0.73940	8.42E-99	7.84E-96
Birc6	Zdhhc8	0.73938	8.60E-99	8.00E-96
Ndufa2	Zdhhc21	-0.73938	8.60E-99	8.00E-96
Carkd	Selk	0.73936	8.77E-99	8.15E-96
Minos1	Zdhhc8	-0.73930	9.27E-99	8.60E-96
Snx6	Selk	0.73926	9.59E-99	8.88E-96
Map9	Zdhhc8	0.73925	9.71E-99	8.99E-96
Gnaq	Zdhhc8	0.73925	9.72E-99	8.99E-96
5730455P16Rik	Golga7b	0.73922	9.96E-99	9.20E-96
Cpeb3	Zdhhc8	0.73907	1.15E-98	1.06E-95
Rell2	Golga7b	0.73906	1.15E-98	1.06E-95
Micu3	Golga7b	0.73904	1.18E-98	1.08E-95
Pdpk1	Zdhhc8	0.73897	1.25E-98	1.15E-95
Ost4	Zdhhc8	-0.73896	1.26E-98	1.16E-95
Reep2	Selk	-0.73896	1.27E-98	1.16E-95
Camta2	Zdhhc8	0.73895	1.28E-98	1.17E-95
Eef1a1	Selk	0.73886	1.39E-98	1.27E-95
Ilk	Selk	0.73885	1.40E-98	1.28E-95
Rab9b	Golga7b	0.73884	1.42E-98	1.29E-95
Peg13	Zdhhc5	0.73879	1.48E-98	1.35E-95
Polr2j	Selk	0.73873	1.56E-98	1.43E-95
1810037I17Rik	Zdhhc8	-0.73869	1.62E-98	1.48E-95
Grik5	Zdhhc8	0.73869	1.62E-98	1.48E-95
Srcin1	Zdhhc21	0.73867	1.66E-98	1.50E-95
Eif3g	Selk	0.73853	1.87E-98	1.70E-95
Pik3ca	Zdhhc5	0.73848	1.96E-98	1.78E-95
Wnk2	Zdhhc8	0.73847	1.99E-98	1.80E-95
Gpr162	Zdhhc21	0.73839	2.12E-98	1.92E-95
Thy1	Golga7b	0.73839	2.13E-98	1.92E-95
Npc2	Zdhhc8	-0.73837	2.17E-98	1.96E-95
Adam22	Zdhhc21	0.73835	2.22E-98	2.00E-95
Disp2	Golga7b	0.73834	2.24E-98	2.02E-95
Ostc	Selk	0.73831	2.29E-98	2.07E-95
Tmem198	Zdhhc8	0.73830	2.32E-98	2.09E-95
Ppip5k1	Selk	-0.73829	2.33E-98	2.09E-95
Htt	Zdhhc8	0.73820	2.53E-98	2.27E-95
Kcnb1	Golga7b	0.73818	2.58E-98	2.31E-95
Map3k10	Golga7b	0.73817	2.61E-98	2.34E-95
Ncdn	Golga7b	0.73814	2.69E-98	2.40E-95
Begain	Zdhhc8	0.73813	2.72E-98	2.43E-95
Ccrn4l	Golga7b	0.73807	2.87E-98	2.56E-95
Pcnxl2	Zdhhc8	0.73806	2.90E-98	2.59E-95
Rnf220	Zdhhc8	0.73805	2.91E-98	2.59E-95
Ralgapb	Selk	-0.73801	3.02E-98	2.69E-95
Mapk9	Zdhhc8	0.73774	3.85E-98	3.42E-95
Kifc2	Selk	-0.73772	3.95E-98	3.51E-95
Zfp612	Golga7b	0.73770	4.02E-98	3.57E-95
Ppip5k1	Zdhhc8	0.73758	4.46E-98	3.95E-95
Atxn2	Zdhhc8	0.73753	4.69E-98	4.15E-95
Rpl18	Zdhhc8	-0.73741	5.21E-98	4.61E-95
Hsd17b10	Zdhhc8	-0.73733	5.63E-98	4.98E-95
Slc35f1	Zdhhc2	0.73732	5.68E-98	5.02E-95
Atraid	Selk	0.73731	5.74E-98	5.07E-95
Mrpl14	Selk	0.73727	5.92E-98	5.22E-95
Uhrf1bp1l	Zdhhc8	0.73718	6.46E-98	5.69E-95
Snapin	Selk	0.73713	6.74E-98	5.93E-95
Syn1	Zdhhc21	0.73711	6.89E-98	6.05E-95
Anapc13	Golga7b	-0.73704	7.34E-98	6.44E-95
Wdfy3	Selk	-0.73702	7.45E-98	6.54E-95
Cstb	Zdhhc21	-0.73696	7.88E-98	6.90E-95
Tango2	Golga7b	0.73689	8.39E-98	7.34E-95
Pura	Golga7b	0.73685	8.69E-98	7.60E-95
Mapk8ip2	Zdhhc8	0.73675	9.55E-98	8.34E-95
Rps21	Selk	0.73674	9.56E-98	8.35E-95
Ybx1	Zdhhc8	-0.73673	9.70E-98	8.46E-95
Ttbk2	Zdhhc8	0.73672	9.82E-98	8.55E-95
Nyap2	Golga7b	0.73668	1.02E-97	8.85E-95
Psmb6	Zdhhc8	-0.73665	1.04E-97	9.06E-95
Mfsd4	Zdhhc8	0.73663	1.06E-97	9.20E-95
Trim66	Golga7b	0.73663	1.06E-97	9.21E-95
Slitrk1	Golga7b	0.73659	1.10E-97	9.56E-95
6430548M08Rik	Zdhhc21	0.73653	1.17E-97	1.01E-94
Prrc2b	Zdhhc8	0.73644	1.26E-97	1.09E-94
Hnrnpk	Selk	0.73643	1.27E-97	1.10E-94
Atp9a	Golga7b	0.73643	1.28E-97	1.10E-94
Lpgat1	Golga7b	0.73640	1.30E-97	1.12E-94
Scn1b	Zdhhc8	0.73639	1.31E-97	1.13E-94
Lamp1	Selk	0.73623	1.53E-97	1.32E-94
Tnrc6c	Selk	-0.73615	1.65E-97	1.42E-94
Ylpm1	Golga7b	0.73603	1.83E-97	1.58E-94
Rab6a	Golga7b	0.73601	1.86E-97	1.60E-94
Ech1	Zdhhc21	-0.73597	1.92E-97	1.65E-94
Gng5	Golga7b	-0.73596	1.94E-97	1.66E-94
Adgrl1	Zdhhc21	0.73594	1.98E-97	1.70E-94
Pfkp	Golga7b	0.73579	2.27E-97	1.94E-94
Shfm1	Zdhhc8	-0.73577	2.31E-97	1.97E-94
Socs7	Golga7b	0.73576	2.33E-97	1.99E-94
Lppr4	Golga7b	0.73569	2.49E-97	2.12E-94
Efna3	Golga7b	0.73567	2.54E-97	2.17E-94
Pde6d	Selk	0.73565	2.58E-97	2.20E-94
Spcs2	Zdhhc8	-0.73561	2.66E-97	2.26E-94
Scn8a	Selk	-0.73560	2.70E-97	2.29E-94
Lrfn5	Golga7b	0.73559	2.73E-97	2.31E-94
Unc80	Zdhhc5	0.73558	2.75E-97	2.33E-94
Lynx1	Selk	-0.73554	2.85E-97	2.42E-94
Trank1	Zdhhc8	0.73552	2.89E-97	2.45E-94
Scn1a	Zdhhc8	0.73549	2.97E-97	2.51E-94
Tmem256	Zdhhc5	-0.73548	3.01E-97	2.54E-94
B4galt6	Golga7b	0.73547	3.03E-97	2.56E-94
Arfgap1	Golga7b	0.73533	3.43E-97	2.89E-94
Atxn2	Zdhhc21	0.73531	3.50E-97	2.94E-94
Ap3b2	Zdhhc21	0.73528	3.61E-97	3.03E-94
Sipa1l1	Golga7b	0.73522	3.79E-97	3.19E-94
Nktr	Zdhhc8	0.73522	3.81E-97	3.20E-94
Ina	Zdhhc21	0.73518	3.93E-97	3.30E-94
Cep170b	Zdhhc8	0.73510	4.23E-97	3.54E-94
Rpl4	Selk	0.73501	4.58E-97	3.83E-94
Frrs1l	Zdhhc8	0.73500	4.64E-97	3.88E-94
Cend1	Zdhhc21	0.73497	4.75E-97	3.97E-94
Arhgap35	Zdhhc8	0.73486	5.27E-97	4.40E-94
Amigo1	Zdhhc8	0.73481	5.51E-97	4.60E-94
Lpgat1	Zdhhc21	0.73473	5.94E-97	4.95E-94
Plekha6	Zdhhc8	0.73471	6.01E-97	5.00E-94
Gabrb2	Zdhhc21	0.73464	6.42E-97	5.34E-94
Mrps21	Zdhhc8	-0.73462	6.56E-97	5.45E-94
Rps24	Zdhhc8	-0.73461	6.60E-97	5.48E-94
Herc1	Selk	-0.73448	7.42E-97	6.15E-94
Pde4a	Zdhhc21	0.73442	7.79E-97	6.45E-94
Phpt1	Selk	0.73440	7.99E-97	6.61E-94
Strbp	Golga7b	0.73436	8.27E-97	6.84E-94
Gap43	Golga7b	0.73435	8.32E-97	6.87E-94
Pum2	Zdhhc8	0.73430	8.70E-97	7.18E-94
Zbtb4	Zdhhc5	0.73430	8.71E-97	7.18E-94
Klhdc3	Golga7b	0.73427	8.94E-97	7.36E-94
Soga3	Golga7b	0.73426	9.01E-97	7.42E-94
Cnnm1	Zdhhc8	0.73420	9.52E-97	7.82E-94
Sh2d5	Golga7b	0.73416	9.85E-97	8.09E-94
Sppl3	Selk	-0.73413	1.01E-96	8.33E-94
Cacnb4	Zdhhc21	0.73412	1.02E-96	8.37E-94
Gnb2l1	Zdhhc21	-0.73412	1.02E-96	8.38E-94
Cacna1a	Zdhhc21	0.73406	1.08E-96	8.87E-94
Car11	Golga7b	0.73405	1.09E-96	8.94E-94
Syf2	Zdhhc8	-0.73396	1.18E-96	9.67E-94
A330023F24Rik	Zdhhc5	0.73394	1.21E-96	9.85E-94
Uqcr11	Zdhhc8	-0.73393	1.21E-96	9.85E-94
Nceh1	Zdhhc21	0.73392	1.22E-96	9.95E-94
Parp6	Zdhhc8	0.73390	1.25E-96	1.01E-93
Ptges3	Selk	0.73386	1.29E-96	1.05E-93
Ttbk1	Zdhhc8	0.73382	1.33E-96	1.08E-93
Map7d2	Zdhhc8	0.73374	1.44E-96	1.17E-93
Pgbd5	Golga7b	0.73370	1.49E-96	1.21E-93
Scai	Zdhhc8	0.73368	1.52E-96	1.23E-93
Cds1	Golga7b	0.73366	1.55E-96	1.26E-93
Rps18	Zdhhc8	-0.73365	1.55E-96	1.26E-93
Cox6c	Selk	0.73364	1.57E-96	1.27E-93
Chchd1	Zdhhc8	-0.73361	1.62E-96	1.31E-93
Mapk9	Zdhhc21	0.73360	1.63E-96	1.31E-93
Cdkl5	Golga7b	0.73358	1.67E-96	1.34E-93
Resp18	Golga7b	0.73354	1.72E-96	1.39E-93
AI314180	Zdhhc21	0.73348	1.82E-96	1.46E-93
Rims4	Golga7b	0.73342	1.91E-96	1.53E-93
Lingo1	Golga7b	0.73342	1.91E-96	1.53E-93
Atxn7l3	Selk	-0.73337	2.00E-96	1.60E-93
Vezt	Zdhhc8	0.73337	2.01E-96	1.61E-93
Alyref	Selk	0.73328	2.18E-96	1.74E-93
Cdk10	Zdhhc8	0.73327	2.19E-96	1.75E-93
Usp34	Zdhhc21	0.73322	2.28E-96	1.82E-93
Mirg	Zdhhc8	0.73321	2.31E-96	1.85E-93
Usp34	Golga7b	0.73306	2.65E-96	2.12E-93
Plxna4	Selk	-0.73303	2.73E-96	2.17E-93
Nckipsd	Selk	-0.73293	2.98E-96	2.37E-93
Ina	Zdhhc8	0.73291	3.03E-96	2.41E-93
Ash1l	Zdhhc21	0.73282	3.27E-96	2.60E-93
Atp5k	Selk	0.73282	3.27E-96	2.60E-93
Rpl18	Zdhhc21	-0.73281	3.29E-96	2.61E-93
Herc2	Golga7b	0.73281	3.32E-96	2.63E-93
Pomp	Selk	0.73272	3.58E-96	2.83E-93
Begain	Golga7b	0.73267	3.73E-96	2.95E-93
Fgf14	Golga7b	0.73258	4.05E-96	3.20E-93
Slc6a17	Golga7b	0.73256	4.14E-96	3.27E-93
Nudcd3	Zdhhc8	0.73256	4.15E-96	3.27E-93
Polr2d	Selk	0.73249	4.41E-96	3.48E-93
Minos1	Selk	0.73247	4.46E-96	3.51E-93
Tecpr2	Zdhhc8	0.73244	4.60E-96	3.62E-93
Slc6a15	Golga7b	0.73239	4.80E-96	3.77E-93
Svop	Zdhhc8	0.73237	4.90E-96	3.84E-93
Psd	Zdhhc8	0.73237	4.90E-96	3.84E-93
Rps19	Zdhhc8	-0.73237	4.91E-96	3.85E-93
Ptpn5	Zdhhc8	0.73235	4.98E-96	3.90E-93
Ppp1r9b	Selk	-0.73234	5.03E-96	3.93E-93
Shc2	Golga7b	0.73232	5.11E-96	3.99E-93
Syngr1	Zdhhc21	0.73215	5.93E-96	4.63E-93
Eif1	Zdhhc21	-0.73210	6.23E-96	4.86E-93
Usp5	Golga7b	0.73209	6.29E-96	4.90E-93
Pgr	Zdhhc8	0.73208	6.33E-96	4.93E-93
Grin2b	Zdhhc8	0.73207	6.38E-96	4.97E-93
Atp5j2	Zdhhc8	-0.73206	6.43E-96	5.00E-93
Aamp	Selk	0.73206	6.47E-96	5.03E-93
Trerf1	Zdhhc8	0.73204	6.56E-96	5.09E-93
Calm3	Golga7b	0.73204	6.57E-96	5.09E-93
Rptor	Selk	-0.73199	6.85E-96	5.31E-93
Tnpo2	Selk	-0.73198	6.91E-96	5.35E-93
Zmat3	Zdhhc21	0.73196	7.06E-96	5.46E-93
Rbfox2	Zdhhc8	0.73194	7.20E-96	5.56E-93
Fgf12	Zdhhc21	0.73193	7.22E-96	5.58E-93
Zfhx2	Zdhhc8	0.73192	7.30E-96	5.63E-93
Uchl1	Golga7b	0.73189	7.50E-96	5.78E-93
Dusp8	Selk	-0.73188	7.57E-96	5.83E-93
Iqsec1	Zdhhc8	0.73185	7.74E-96	5.96E-93
Kcnb2	Golga7b	0.73162	9.50E-96	7.30E-93
Sh3bp1	Golga7b	0.73162	9.55E-96	7.34E-93
Ttc3	Zdhhc8	0.73161	9.65E-96	7.40E-93
Rufy3	Zdhhc21	0.73159	9.78E-96	7.50E-93
Nol4	Golga7b	0.73157	9.96E-96	7.63E-93
Arhgap32	Golga7b	0.73141	1.15E-95	8.78E-93
Eef1d	Zdhhc8	-0.73137	1.19E-95	9.07E-93
Dpp9	Selk	-0.73128	1.29E-95	9.82E-93
Commd1	Zdhhc21	-0.73123	1.35E-95	1.03E-92
Dgke	Zdhhc8	0.73122	1.36E-95	1.04E-92
Gm9866	Golga7b	0.73121	1.38E-95	1.05E-92
Mrpl40	Selk	0.73116	1.44E-95	1.09E-92
Cox6a1	Zdhhc21	-0.73110	1.51E-95	1.15E-92
Fam155a	Zdhhc21	0.73102	1.62E-95	1.23E-92
Disp2	Zdhhc8	0.73101	1.64E-95	1.25E-92
Ankrd34a	Zdhhc8	0.73098	1.68E-95	1.27E-92
Smg1	Selk	-0.73095	1.73E-95	1.31E-92
Dbi	Golga7b	-0.73085	1.89E-95	1.43E-92
Dennd5b	Zdhhc21	0.73084	1.90E-95	1.44E-92
Fcho1	Golga7b	0.73076	2.04E-95	1.54E-92
Ncs1	Golga7b	0.73068	2.20E-95	1.66E-92
Lrrc7	Zdhhc8	0.73062	2.32E-95	1.75E-92
Atp5e	Selk	0.73053	2.50E-95	1.89E-92
Gatsl2	Golga7b	0.73047	2.63E-95	1.98E-92
AI854703	Zdhhc8	0.73034	2.97E-95	2.24E-92
Myh10	Zdhhc8	0.73031	3.03E-95	2.28E-92
Atg2b	Zdhhc8	0.73027	3.16E-95	2.37E-92
Ech1	Golga7b	-0.73022	3.30E-95	2.48E-92
Fam171a2	Zdhhc8	0.73018	3.41E-95	2.56E-92
Zbtb7a	Golga7b	0.73015	3.49E-95	2.62E-92
Clstn3	Zdhhc8	0.73015	3.50E-95	2.62E-92
Rundc3b	Golga7b	0.73013	3.56E-95	2.67E-92
Slc2a6	Golga7b	0.73005	3.83E-95	2.86E-92
Fam162a	Selk	0.73000	3.98E-95	2.98E-92
Bcas2	Selk	0.72996	4.13E-95	3.08E-92
Nwd2	Golga7b	0.72995	4.17E-95	3.11E-92
Tmem50a	Zdhhc21	-0.72992	4.29E-95	3.20E-92
Atp6v1g2	Golga7b	0.72991	4.33E-95	3.22E-92
Bend6	Golga7b	0.72989	4.42E-95	3.29E-92
Usp32	Zdhhc8	0.72985	4.56E-95	3.39E-92
Dnajc5	Zdhhc5	0.72982	4.68E-95	3.48E-92
Chchd2	Zdhhc8	-0.72979	4.80E-95	3.56E-92
Psma5	Selk	0.72978	4.84E-95	3.59E-92
Taok1	Golga7b	0.72975	5.00E-95	3.70E-92
Cox8a	Zdhhc8	-0.72974	5.01E-95	3.71E-92
Napb	Zdhhc21	0.72964	5.49E-95	4.06E-92
Gabra1	Zdhhc8	0.72960	5.66E-95	4.18E-92
Phlpp2	Zdhhc8	0.72956	5.87E-95	4.34E-92
Mfsd6	Golga7b	0.72955	5.95E-95	4.39E-92
Kmt2a	Zdhhc5	0.72955	5.95E-95	4.39E-92
Rpl7	Zdhhc8	-0.72952	6.11E-95	4.50E-92
Ank2	Zdhhc21	0.72950	6.20E-95	4.56E-92
Sptbn2	Zdhhc8	0.72942	6.64E-95	4.88E-92
Rasgrf1	Golga7b	0.72940	6.75E-95	4.96E-92
Taldo1	Zdhhc5	-0.72936	7.03E-95	5.16E-92
Nap1l3	Zdhhc21	0.72933	7.21E-95	5.29E-92
Rian	Golga7b	0.72932	7.26E-95	5.32E-92
Rims4	Zdhhc21	0.72930	7.38E-95	5.40E-92
Fbxo33	Selk	-0.72930	7.41E-95	5.42E-92
Usp13	Golga7b	0.72929	7.45E-95	5.44E-92
Tmem179	Zdhhc8	0.72928	7.51E-95	5.48E-92
Mast1	Zdhhc8	0.72923	7.85E-95	5.73E-92
Zyg11b	Zdhhc21	0.72920	8.11E-95	5.91E-92
Ppp3cb	Golga7b	0.72919	8.17E-95	5.95E-92
Tcf20	Selk	-0.72913	8.59E-95	6.25E-92
Stxbp5	Golga7b	0.72913	8.60E-95	6.26E-92
Ppme1	Zdhhc21	0.72909	8.92E-95	6.48E-92
Plxna4	Zdhhc8	0.72904	9.28E-95	6.74E-92
Pak3	Zdhhc8	0.72903	9.34E-95	6.77E-92
Map3k10	Zdhhc8	0.72902	9.44E-95	6.84E-92
Polr2i	Selk	0.72897	9.92E-95	7.19E-92
Wdr89	Zdhhc8	-0.72896	9.97E-95	7.21E-92
Snap25	Zdhhc21	0.72895	1.00E-94	7.26E-92
Fam20b	Zdhhc8	0.72893	1.02E-94	7.40E-92
Pak3	Golga7b	0.72893	1.03E-94	7.41E-92
Usp13	Zdhhc21	0.72892	1.03E-94	7.44E-92
Tango2	Zdhhc21	0.72892	1.04E-94	7.47E-92
Cacna1d	Selk	-0.72863	1.33E-94	9.59E-92
Adam11	Zdhhc8	0.72851	1.48E-94	1.06E-91
Purb	Zdhhc21	0.72850	1.49E-94	1.07E-91
Smim11	Zdhhc8	-0.72847	1.53E-94	1.10E-91
Ankrd17	Selk	-0.72829	1.80E-94	1.29E-91
Chka	Selk	-0.72826	1.85E-94	1.32E-91
Myo5a	Golga7b	0.72825	1.86E-94	1.34E-91
Mrpl36	Selk	0.72820	1.93E-94	1.39E-91
Birc6	Selk	-0.72816	2.01E-94	1.43E-91
Megf8	Zdhhc5	0.72813	2.06E-94	1.47E-91
Sgip1	Zdhhc21	0.72812	2.08E-94	1.48E-91
Larp4b	Selk	-0.72808	2.15E-94	1.54E-91
Eef1a2	Zdhhc21	0.72804	2.22E-94	1.59E-91
Chmp2a	Zdhhc8	-0.72799	2.32E-94	1.66E-91
Braf	Golga7b	0.72797	2.36E-94	1.68E-91
Nos1ap	Golga7b	0.72796	2.40E-94	1.70E-91
Dstn	Selk	0.72793	2.46E-94	1.74E-91
Hist1h2bc	Zdhhc21	-0.72791	2.50E-94	1.78E-91
Nyap1	Golga7b	0.72788	2.56E-94	1.81E-91
Lemd3	Zdhhc8	0.72785	2.64E-94	1.87E-91
Sptssa	Golga7b	-0.72783	2.68E-94	1.90E-91
Cox6b1	Selk	0.72772	2.96E-94	2.10E-91
A830039N20Rik	Zdhhc8	0.72771	2.98E-94	2.10E-91
Ggt7	Golga7b	0.72766	3.10E-94	2.19E-91
Kif1a	Golga7b	0.72759	3.31E-94	2.33E-91
Snhg14	Zdhhc5	0.72757	3.37E-94	2.38E-91
Cox20	Zdhhc8	-0.72753	3.47E-94	2.45E-91
Map3k10	Selk	-0.72750	3.58E-94	2.52E-91
Dgkq	Zdhhc8	0.72746	3.71E-94	2.61E-91
Rps3a1	Selk	0.72741	3.86E-94	2.71E-91
Mrpl27	Selk	0.72730	4.24E-94	2.98E-91
Brsk1	Zdhhc8	0.72729	4.30E-94	3.02E-91
Gltscr1l	Selk	-0.72728	4.33E-94	3.04E-91
Ube2m	Zdhhc5	0.72717	4.77E-94	3.35E-91
Dcun1d4	Golga7b	0.72715	4.84E-94	3.39E-91
Gm27032	Golga7b	0.72713	4.91E-94	3.44E-91
Rps27l	Zdhhc21	-0.72712	4.95E-94	3.46E-91
Ly6h	Golga7b	0.72708	5.13E-94	3.59E-91
Pdia3	Selk	0.72706	5.23E-94	3.65E-91
Rpl37a	Zdhhc8	-0.72706	5.24E-94	3.66E-91
Zfhx2	Golga7b	0.72702	5.42E-94	3.78E-91
Herc1	Zdhhc21	0.72702	5.43E-94	3.78E-91
Rai1	Zdhhc8	0.72701	5.46E-94	3.80E-91
Ranbp1	Selk	0.72700	5.53E-94	3.84E-91
Syt7	Zdhhc5	0.72698	5.62E-94	3.90E-91
Mroh1	Zdhhc5	0.72696	5.73E-94	3.98E-91
Epha10	Zdhhc8	0.72694	5.84E-94	4.05E-91
Ppm1k	Zdhhc21	0.72688	6.12E-94	4.24E-91
Serp2	Golga7b	0.72687	6.16E-94	4.27E-91
Adcy1	Golga7b	0.72686	6.23E-94	4.31E-91
Trim46	Golga7b	0.72683	6.40E-94	4.43E-91
Etfb	Selk	0.72672	7.03E-94	4.86E-91
Fam169a	Golga7b	0.72672	7.03E-94	4.86E-91
Atp6v0a1	Zdhhc5	0.72670	7.16E-94	4.94E-91
Adgrb1	Zdhhc21	0.72669	7.21E-94	4.97E-91
Syngap1	Zdhhc8	0.72667	7.33E-94	5.05E-91
Kcnma1	Zdhhc8	0.72665	7.51E-94	5.17E-91
Ywhag	Zdhhc21	0.72663	7.60E-94	5.23E-91
Nova2	Golga7b	0.72662	7.70E-94	5.29E-91
Rnf165	Zdhhc8	0.72659	7.90E-94	5.43E-91
Prrc2c	Zdhhc8	0.72658	7.93E-94	5.44E-91
Ap1b1	Zdhhc8	0.72658	7.98E-94	5.47E-91
Rpl32	Zdhhc21	-0.72654	8.26E-94	5.66E-91
Adgrb2	Golga7b	0.72647	8.76E-94	6.00E-91
Mfsd4	Zdhhc21	0.72638	9.44E-94	6.46E-91
Gm9843	Zdhhc21	-0.72631	1.00E-93	6.87E-91
Naca	Selk	0.72629	1.02E-93	7.00E-91
Gramd1b	Zdhhc21	0.72628	1.03E-93	7.03E-91
Zyg11b	Zdhhc8	0.72627	1.04E-93	7.12E-91
Rpl22	Golga7b	-0.72626	1.05E-93	7.16E-91
Inha	Selk	-0.72618	1.12E-93	7.65E-91
Atp2b3	Golga7b	0.72618	1.13E-93	7.68E-91
Miat	Golga7b	0.72617	1.13E-93	7.68E-91
Nefh	Zdhhc8	0.72609	1.21E-93	8.25E-91
Pum1	Selk	-0.72607	1.24E-93	8.41E-91
Sult4a1	Zdhhc21	0.72602	1.29E-93	8.73E-91
Slc12a5	Zdhhc8	0.72598	1.34E-93	9.08E-91
Wdfy3	Zdhhc8	0.72596	1.36E-93	9.19E-91
Syngr1	Zdhhc8	0.72596	1.36E-93	9.21E-91
Gdap1	Zdhhc21	0.72592	1.40E-93	9.49E-91
Rb1cc1	Selk	-0.72591	1.42E-93	9.59E-91
Tmem240	Zdhhc8	0.72581	1.55E-93	1.05E-90
Rpl14	Zdhhc21	-0.72577	1.60E-93	1.08E-90
Ahsa1	Selk	0.72575	1.63E-93	1.10E-90
Zmat3	Golga7b	0.72566	1.76E-93	1.18E-90
Ankrd13d	Golga7b	0.72564	1.80E-93	1.21E-90
Ost4	Zdhhc21	-0.72562	1.82E-93	1.22E-90
Pdpk1	Golga7b	0.72556	1.92E-93	1.29E-90
Pi4k2a	Zdhhc8	0.72555	1.94E-93	1.30E-90
Rabgap1l	Golga7b	0.72553	1.98E-93	1.33E-90
Yif1a	Selk	0.72552	1.99E-93	1.34E-90
Psmb5	Selk	0.72549	2.04E-93	1.36E-90
Sobp	Zdhhc21	0.72547	2.08E-93	1.40E-90
Map1a	Zdhhc8	0.72545	2.11E-93	1.41E-90
6430548M08Rik	Zdhhc8	0.72540	2.21E-93	1.48E-90
Rpl36	Zdhhc8	-0.72537	2.27E-93	1.52E-90
Cacng2	Zdhhc5	0.72529	2.42E-93	1.62E-90
Gpr158	Golga7b	0.72524	2.54E-93	1.70E-90
Mirg	Golga7b	0.72522	2.57E-93	1.71E-90
P4hb	Golga7b	-0.72518	2.68E-93	1.78E-90
Dpp10	Golga7b	0.72517	2.69E-93	1.79E-90
Dnajc6	Golga7b	0.72516	2.72E-93	1.81E-90
Stmn3	Golga7b	0.72512	2.81E-93	1.87E-90
Kpna1	Zdhhc8	0.72510	2.85E-93	1.89E-90
Whsc1	Zdhhc21	0.72510	2.85E-93	1.89E-90
Smg7	Zdhhc8	0.72506	2.96E-93	1.96E-90
A330023F24Rik	Zdhhc8	0.72492	3.33E-93	2.20E-90
Smim11	Zdhhc21	-0.72488	3.47E-93	2.30E-90
H3f3b	Zdhhc21	-0.72485	3.55E-93	2.35E-90
Rplp0	Selk	0.72477	3.80E-93	2.51E-90
Kpna1	Golga7b	0.72475	3.87E-93	2.55E-90
Anp32e	Selk	0.72470	4.03E-93	2.66E-90
H3f3a	Zdhhc8	-0.72468	4.10E-93	2.70E-90
Atp6v1a	Golga7b	0.72467	4.16E-93	2.74E-90
Zer1	Golga7b	0.72466	4.19E-93	2.76E-90
Sobp	Zdhhc8	0.72463	4.28E-93	2.81E-90
Usp7	Golga7b	0.72463	4.30E-93	2.83E-90
Smim13	Zdhhc21	0.72461	4.37E-93	2.87E-90
Kansl1	Zdhhc5	0.72460	4.42E-93	2.90E-90
Kif3a	Zdhhc8	0.72455	4.59E-93	3.01E-90
Ybx1	Zdhhc21	-0.72454	4.63E-93	3.03E-90
Rnf112	Golga7b	0.72450	4.78E-93	3.13E-90
Rgs7	Golga7b	0.72448	4.86E-93	3.18E-90
Ywhaq	Selk	0.72445	5.00E-93	3.27E-90
Numbl	Zdhhc8	0.72438	5.31E-93	3.47E-90
Mir124a-1hg	Zdhhc5	0.72438	5.31E-93	3.47E-90
Grin2b	Golga7b	0.72437	5.36E-93	3.50E-90
Grm5	Zdhhc8	0.72433	5.53E-93	3.61E-90
Slirp	Zdhhc8	-0.72432	5.59E-93	3.64E-90
Tcaf1	Zdhhc21	0.72432	5.61E-93	3.65E-90
Spcs1	Zdhhc8	-0.72431	5.62E-93	3.66E-90
Myl12a	Golga7b	-0.72428	5.78E-93	3.76E-90
Atp5k	Zdhhc8	-0.72426	5.91E-93	3.84E-90
Chd8	Zdhhc8	0.72424	5.98E-93	3.88E-90
Mapre3	Golga7b	0.72423	6.06E-93	3.93E-90
Peg13	Selk	-0.72420	6.18E-93	4.00E-90
Adar	Golga7b	0.72409	6.82E-93	4.42E-90
Zfp644	Zdhhc21	0.72407	6.92E-93	4.48E-90
C77370	Zdhhc8	0.72403	7.17E-93	4.64E-90
Rpl13	Zdhhc8	-0.72402	7.22E-93	4.67E-90
Tenm2	Zdhhc8	0.72402	7.25E-93	4.68E-90
Gm37899	Golga7b	0.72400	7.40E-93	4.77E-90
Kcnma1	Zdhhc21	0.72400	7.40E-93	4.77E-90
Scamp5	Zdhhc8	0.72396	7.64E-93	4.92E-90
Trrap	Selk	-0.72395	7.68E-93	4.94E-90
Cntn1	Zdhhc2	0.72394	7.75E-93	4.99E-90
Rpl41	Zdhhc8	-0.72392	7.89E-93	5.07E-90
Celf2	Zdhhc8	0.72376	9.07E-93	5.82E-90
Ndufa7	Zdhhc21	-0.72374	9.18E-93	5.90E-90
Fis1	Zdhhc8	-0.72374	9.24E-93	5.93E-90
AI314180	Zdhhc5	0.72373	9.29E-93	5.96E-90
Rpl23	Selk	0.72372	9.33E-93	5.98E-90
Apba2	Zdhhc21	0.72371	9.49E-93	6.07E-90
Snx6	Zdhhc8	-0.72370	9.56E-93	6.12E-90
Chpf2	Selk	-0.72368	9.67E-93	6.18E-90
Irgq	Zdhhc8	0.72368	9.67E-93	6.18E-90
Map6	Zdhhc8	0.72366	9.86E-93	6.29E-90
Prdx1	Zdhhc21	-0.72366	9.87E-93	6.30E-90
Ppme1	Golga7b	0.72356	1.07E-92	6.84E-90
Sv2a	Zdhhc8	0.72355	1.08E-92	6.90E-90
Caly	Golga7b	0.72354	1.09E-92	6.97E-90
Synj1	Zdhhc21	0.72348	1.15E-92	7.30E-90
Celf6	Golga7b	0.72346	1.17E-92	7.42E-90
Abcc5	Zdhhc8	0.72345	1.18E-92	7.51E-90
Cetn3	Selk	0.72337	1.26E-92	8.00E-90
5330417C22Rik	Golga7b	0.72336	1.27E-92	8.05E-90
Adap1	Zdhhc8	0.72323	1.43E-92	9.06E-90
Nckap1	Zdhhc8	0.72322	1.44E-92	9.11E-90
Arhgap44	Zdhhc8	0.72307	1.64E-92	1.04E-89
Dlgap1	Zdhhc8	0.72297	1.77E-92	1.12E-89
Bag4	Golga7b	0.72297	1.78E-92	1.12E-89
Cox7c	Selk	0.72291	1.87E-92	1.18E-89
Iqsec2	Golga7b	0.72291	1.88E-92	1.18E-89
Scn2b	Golga7b	0.72275	2.15E-92	1.35E-89
Lrrc4b	Zdhhc8	0.72273	2.18E-92	1.37E-89
Sf3b6	Selk	0.72273	2.18E-92	1.37E-89
Kansl1	Zdhhc8	0.72272	2.21E-92	1.39E-89
Camsap1	Zdhhc21	0.72269	2.26E-92	1.42E-89
Scamp5	Golga7b	0.72265	2.33E-92	1.46E-89
Panx2	Zdhhc8	0.72265	2.34E-92	1.47E-89
Npc2	Golga7b	-0.72262	2.40E-92	1.51E-89
Kcnc3	Zdhhc8	0.72262	2.40E-92	1.51E-89
Srrm3	Selk	-0.72261	2.42E-92	1.52E-89
Nat8l	Zdhhc21	0.72251	2.63E-92	1.65E-89
Clec2l	Zdhhc21	0.72250	2.65E-92	1.66E-89
Ogfod1	Zdhhc8	0.72245	2.77E-92	1.73E-89
Xkr4	Zdhhc21	0.72241	2.87E-92	1.79E-89
Lrrc58	Zdhhc8	-0.72239	2.93E-92	1.83E-89
Camkk1	Golga7b	0.72235	3.02E-92	1.89E-89
Srpk2	Zdhhc8	0.72234	3.03E-92	1.89E-89
Elovl4	Zdhhc21	0.72234	3.04E-92	1.89E-89
Atox1	Zdhhc21	-0.72233	3.06E-92	1.91E-89
Sel1l	Zdhhc21	0.72232	3.11E-92	1.93E-89
Ralgapa1	Selk	-0.72229	3.17E-92	1.97E-89
Shank1	Golga7b	0.72226	3.27E-92	2.03E-89
Nap1l2	Golga7b	0.72224	3.30E-92	2.05E-89
Ndufc1	Selk	0.72222	3.38E-92	2.09E-89
Kcnj6	Golga7b	0.72219	3.46E-92	2.15E-89
Tmx4	Golga7b	0.72215	3.59E-92	2.22E-89
5730409E04Rik	Golga7b	0.72208	3.79E-92	2.35E-89
Nyap2	Zdhhc8	0.72202	3.99E-92	2.47E-89
Atg3	Selk	0.72201	4.03E-92	2.49E-89
Flywch1	Zdhhc21	0.72201	4.03E-92	2.49E-89
Romo1	Selk	0.72197	4.18E-92	2.58E-89
Gpr85	Golga7b	0.72196	4.21E-92	2.59E-89
B830012L14Rik	Zdhhc8	0.72195	4.23E-92	2.61E-89
Lonrf2	Golga7b	0.72187	4.53E-92	2.79E-89
Slc6a7	Zdhhc8	0.72186	4.57E-92	2.81E-89
Herc3	Golga7b	0.72184	4.66E-92	2.87E-89
Zer1	Selk	-0.72183	4.71E-92	2.90E-89
Nbea	Golga7b	0.72180	4.83E-92	2.96E-89
Cx3cl1	Golga7b	0.72179	4.86E-92	2.98E-89
Rab6a	Zdhhc21	0.72178	4.91E-92	3.01E-89
Mir124a-1hg	Zdhhc21	0.72176	4.98E-92	3.05E-89
Mcee	Selk	0.72174	5.08E-92	3.11E-89
Adgrb3	Golga7b	0.72159	5.77E-92	3.53E-89
Kifc2	Zdhhc21	0.72157	5.88E-92	3.59E-89
Psmb4	Selk	0.72155	5.99E-92	3.66E-89
Fat3	Golga7b	0.72150	6.22E-92	3.80E-89
Dagla	Zdhhc8	0.72140	6.78E-92	4.14E-89
Fam126b	Golga7b	0.72136	7.01E-92	4.27E-89
Ppp3r1	Zdhhc8	0.72135	7.09E-92	4.32E-89
Tmem56	Golga7b	0.72129	7.45E-92	4.54E-89
Prkar1b	Zdhhc21	0.72127	7.57E-92	4.61E-89
Fam189a1	Zdhhc8	0.72124	7.74E-92	4.71E-89
Snx32	Golga7b	0.72111	8.67E-92	5.27E-89
Epha10	Golga7b	0.72108	8.86E-92	5.38E-89
Tbc1d9	Zdhhc21	0.72108	8.87E-92	5.39E-89
Csmd1	Golga7b	0.72108	8.88E-92	5.39E-89
Arfgef3	Zdhhc8	0.72105	9.11E-92	5.52E-89
Map7d2	Golga7b	0.72105	9.13E-92	5.53E-89
Rps5	Selk	0.72099	9.59E-92	5.81E-89
Pianp	Zdhhc8	0.72095	9.93E-92	6.00E-89
Atp2b3	Zdhhc8	0.72094	1.00E-91	6.04E-89
Syt1	Zdhhc8	0.72092	1.01E-91	6.12E-89
Atp6v0e2	Golga7b	0.72092	1.01E-91	6.12E-89
Elavl4	Golga7b	0.72088	1.05E-91	6.33E-89
Peg13	Golga7b	0.72086	1.07E-91	6.46E-89
Arhgef4	Zdhhc8	0.72084	1.09E-91	6.54E-89
Mapk8ip3	Zdhhc21	0.72076	1.16E-91	6.98E-89
Tecpr1	Selk	-0.72069	1.24E-91	7.44E-89
Krtcap2	Zdhhc8	-0.72066	1.27E-91	7.64E-89
Clec2l	Zdhhc8	0.72066	1.27E-91	7.64E-89
Ptpmt1	Selk	0.72065	1.28E-91	7.66E-89
Tmem25	Zdhhc8	0.72065	1.28E-91	7.68E-89
Rims1	Zdhhc8	0.72061	1.32E-91	7.92E-89
Gm10419	Zdhhc8	0.72053	1.42E-91	8.48E-89
Ndrg3	Zdhhc21	0.72050	1.45E-91	8.70E-89
Eef1d	Golga7b	-0.72049	1.46E-91	8.71E-89
Inpp4a	Zdhhc8	0.72047	1.49E-91	8.88E-89
Aamdc	Zdhhc8	-0.72045	1.52E-91	9.06E-89
Slc6a17	Selk	-0.72044	1.53E-91	9.12E-89
Fbxl19	Zdhhc8	0.72040	1.58E-91	9.45E-89
Rps18	Selk	0.72039	1.60E-91	9.52E-89
Slc6a17	Zdhhc5	0.72035	1.64E-91	9.80E-89
Fbxo31	Golga7b	0.72025	1.79E-91	1.07E-88
Dnajb14	Zdhhc21	0.72025	1.79E-91	1.07E-88
Sidt1	Golga7b	0.72020	1.88E-91	1.12E-88
Slc45a1	Golga7b	0.72013	1.98E-91	1.17E-88
Rpl8	Selk	0.72008	2.06E-91	1.22E-88
Tnrc6c	Zdhhc8	0.72006	2.10E-91	1.25E-88
Gas5	Selk	0.72003	2.15E-91	1.28E-88
Celsr3	Zdhhc8	0.71991	2.39E-91	1.42E-88
Sacs	Zdhhc21	0.71985	2.50E-91	1.48E-88
Eml5	Golga7b	0.71985	2.51E-91	1.49E-88
Kif5a	Zdhhc8	0.71984	2.53E-91	1.50E-88
Med21	Selk	0.71981	2.61E-91	1.54E-88
Snrpd2	Selk	0.71980	2.61E-91	1.54E-88
Jph4	Golga7b	0.71979	2.64E-91	1.56E-88
Eif3f	Zdhhc8	-0.71978	2.65E-91	1.56E-88
Pnmal2	Golga7b	0.71974	2.75E-91	1.62E-88
Rbfox2	Golga7b	0.71972	2.80E-91	1.65E-88
Iqsec3	Golga7b	0.71971	2.82E-91	1.66E-88
Cox4i1	Zdhhc8	-0.71971	2.83E-91	1.66E-88
Agbl4	Golga7b	0.71971	2.83E-91	1.66E-88
Ankrd12	Golga7b	0.71966	2.94E-91	1.72E-88
Myl12a	Zdhhc8	-0.71964	2.99E-91	1.76E-88
Sv2a	Golga7b	0.71964	3.01E-91	1.76E-88
Rps9	Golga7b	-0.71938	3.72E-91	2.18E-88
Ndufb3	Selk	0.71938	3.74E-91	2.19E-88
Shank1	Zdhhc8	0.71929	4.03E-91	2.36E-88
Crtc1	Zdhhc8	0.71928	4.04E-91	2.36E-88
Nefl	Golga7b	0.71927	4.09E-91	2.39E-88
RP24-68G17.4	Selk	-0.71925	4.15E-91	2.43E-88
Dpm3	Golga7b	-0.71923	4.23E-91	2.47E-88
Rpl22	Selk	0.71920	4.33E-91	2.53E-88
Impact	Golga7b	0.71920	4.35E-91	2.54E-88
Adcy1	Zdhhc21	0.71919	4.38E-91	2.55E-88
Ubr4	Zdhhc8	0.71918	4.41E-91	2.57E-88
Unc13a	Zdhhc21	0.71917	4.45E-91	2.59E-88
Ackr1	Golga7b	0.71912	4.63E-91	2.69E-88
Tcaf1	Golga7b	0.71909	4.78E-91	2.78E-88
Huwe1	Zdhhc8	0.71908	4.79E-91	2.78E-88
Ttc7b	Golga7b	0.71907	4.82E-91	2.80E-88
Kcnj9	Zdhhc8	0.71906	4.88E-91	2.83E-88
Ap1b1	Zdhhc5	0.71898	5.24E-91	3.04E-88
Ddrgk1	Zdhhc8	-0.71895	5.37E-91	3.11E-88
Pet100	Selk	0.71893	5.45E-91	3.16E-88
6430548M08Rik	Golga7b	0.71889	5.65E-91	3.27E-88
mt-Nd1	Selk	-0.71885	5.80E-91	3.35E-88
Adam11	Golga7b	0.71884	5.88E-91	3.39E-88
Dock3	Zdhhc17	0.71883	5.92E-91	3.42E-88
Abcc5	Selk	-0.71882	5.97E-91	3.45E-88
Dlgap3	Golga7b	0.71878	6.17E-91	3.56E-88
Mapk10	Zdhhc21	0.71872	6.47E-91	3.73E-88
Stx1a	Golga7b	0.71869	6.64E-91	3.82E-88
Tcf20	Zdhhc21	0.71866	6.84E-91	3.94E-88
Fbxo33	Zdhhc21	0.71861	7.10E-91	4.08E-88
Snrpg	Selk	0.71854	7.54E-91	4.33E-88
Herc2	Zdhhc21	0.71844	8.23E-91	4.73E-88
Rps11	Selk	0.71844	8.24E-91	4.73E-88
Lpcat4	Zdhhc8	0.71838	8.66E-91	4.96E-88
Rpl37	Zdhhc8	-0.71832	9.05E-91	5.19E-88
Celsr3	Golga7b	0.71827	9.49E-91	5.43E-88
Ppfia3	Zdhhc8	0.71827	9.49E-91	5.43E-88
Lynx1	Zdhhc5	0.71824	9.73E-91	5.56E-88
Kif3a	Golga7b	0.71822	9.87E-91	5.64E-88
Cox6a1	Zdhhc5	-0.71818	1.02E-90	5.82E-88
Mirg	Selk	-0.71814	1.05E-90	6.00E-88
Cd81	Golga7b	-0.71812	1.07E-90	6.13E-88
Rps25	Zdhhc8	-0.71809	1.10E-90	6.25E-88
Ap3d1	Zdhhc8	0.71805	1.13E-90	6.46E-88
Rnf157	Selk	-0.71799	1.19E-90	6.79E-88
Actb	Zdhhc21	-0.71798	1.21E-90	6.89E-88
Ubxn1	Zdhhc8	-0.71795	1.24E-90	7.05E-88
Thy1	Zdhhc8	0.71793	1.26E-90	7.16E-88
Hnrnpab	Selk	0.71788	1.31E-90	7.42E-88
Itm2b	Zdhhc8	-0.71781	1.38E-90	7.85E-88
Mboat7	Golga7b	0.71777	1.44E-90	8.18E-88
Ppdpf	Selk	0.71758	1.68E-90	9.52E-88
Pnma2	Golga7b	0.71758	1.69E-90	9.57E-88
Taok1	Zdhhc21	0.71757	1.70E-90	9.62E-88
Hmgb1	Zdhhc8	-0.71751	1.79E-90	1.01E-87
Snrpb	Zdhhc21	-0.71750	1.81E-90	1.02E-87
Syn2	Golga7b	0.71749	1.81E-90	1.02E-87
Tmem150c	Golga7b	0.71749	1.81E-90	1.02E-87
Tmem240	Golga7b	0.71748	1.83E-90	1.03E-87
Dcaf5	Golga7b	0.71746	1.86E-90	1.05E-87
Csrnp3	Zdhhc17	0.71745	1.88E-90	1.06E-87
Usp7	Zdhhc8	0.71739	1.97E-90	1.11E-87
Huwe1	Zdhhc5	0.71736	2.03E-90	1.14E-87
Syf2	Zdhhc21	-0.71736	2.03E-90	1.14E-87
Mapk8	Zdhhc8	0.71735	2.03E-90	1.14E-87
Eef1a2	Zdhhc8	0.71735	2.05E-90	1.15E-87
Gatsl2	Zdhhc21	0.71732	2.10E-90	1.18E-87
Rpl30	Zdhhc21	-0.71730	2.12E-90	1.19E-87
Gsk3b	Golga7b	0.71730	2.13E-90	1.19E-87
5730409E04Rik	Zdhhc8	0.71729	2.14E-90	1.20E-87
Gm37899	Zdhhc5	0.71729	2.15E-90	1.20E-87
Iqsec1	Selk	-0.71723	2.25E-90	1.26E-87
Fcho1	Zdhhc8	0.71721	2.29E-90	1.28E-87
Cwc15	Golga7b	-0.71715	2.41E-90	1.35E-87
Myl6	Zdhhc8	-0.71715	2.42E-90	1.35E-87
Map3k9	Zdhhc8	0.71708	2.55E-90	1.43E-87
Myo9a	Zdhhc21	0.71707	2.58E-90	1.44E-87
Txnl4a	Selk	0.71705	2.62E-90	1.46E-87
Timm13	Selk	0.71703	2.66E-90	1.48E-87
B4galt6	Zdhhc21	0.71703	2.66E-90	1.48E-87
Amer3	Zdhhc8	0.71703	2.67E-90	1.49E-87
Dusp8	Zdhhc21	0.71702	2.69E-90	1.50E-87
Csrnp3	Golga7b	0.71701	2.70E-90	1.50E-87
A230006K03Rik	Golga7b	0.71694	2.86E-90	1.59E-87
Wipf2	Golga7b	0.71694	2.87E-90	1.60E-87
Lgi2	Zdhhc21	0.71694	2.88E-90	1.60E-87
Lppr5	Zdhhc2	0.71691	2.95E-90	1.64E-87
Cuta	Selk	0.71690	2.96E-90	1.64E-87
Ndufb6	Selk	0.71689	3.00E-90	1.66E-87
Adar	Zdhhc5	0.71685	3.10E-90	1.72E-87
Arhgap32	Zdhhc8	0.71681	3.21E-90	1.77E-87
Ogdh	Selk	-0.71675	3.36E-90	1.85E-87
Acadm	Selk	0.71675	3.37E-90	1.86E-87
Rab3gap1	Selk	-0.71673	3.42E-90	1.88E-87
Vkorc1	Zdhhc21	-0.71664	3.68E-90	2.03E-87
Naca	Zdhhc8	-0.71658	3.88E-90	2.14E-87
Paqr9	Zdhhc8	0.71654	4.00E-90	2.20E-87
Tesk1	Zdhhc8	0.71653	4.04E-90	2.22E-87
Cacng2	Zdhhc21	0.71652	4.07E-90	2.24E-87
AI854703	Golga7b	0.71651	4.10E-90	2.25E-87
Gdap1l1	Golga7b	0.71651	4.11E-90	2.26E-87
Rpl26	Selk	0.71651	4.11E-90	2.26E-87
Pacsin1	Zdhhc21	0.71650	4.14E-90	2.27E-87
Sprn	Zdhhc8	0.71636	4.64E-90	2.54E-87
Srpk2	Golga7b	0.71635	4.69E-90	2.57E-87
Lsm4	Zdhhc8	-0.71628	4.97E-90	2.72E-87
Scn1b	Zdhhc21	0.71624	5.15E-90	2.82E-87
Tom1l2	Zdhhc21	0.71622	5.21E-90	2.85E-87
Gprasp1	Golga7b	0.71621	5.27E-90	2.88E-87
Zc3h13	Zdhhc8	0.71614	5.57E-90	3.04E-87
Syp	Zdhhc21	0.71614	5.59E-90	3.05E-87
Ube2ql1	Zdhhc21	0.71605	6.03E-90	3.29E-87
Cmas	Golga7b	0.71604	6.06E-90	3.30E-87
Tom1l2	Golga7b	0.71601	6.23E-90	3.39E-87
B3gat3	Zdhhc8	0.71597	6.40E-90	3.49E-87
Gtf3c3	Zdhhc21	0.71597	6.41E-90	3.49E-87
Cd81	Zdhhc8	-0.71595	6.51E-90	3.54E-87
C78339	Zdhhc8	0.71589	6.85E-90	3.73E-87
Hist1h2bc	Zdhhc8	-0.71579	7.42E-90	4.03E-87
Nedd4l	Golga7b	0.71579	7.47E-90	4.06E-87
9930021J03Rik	Zdhhc8	0.71578	7.54E-90	4.09E-87
Jph3	Selk	-0.71575	7.68E-90	4.17E-87
Ssr4	Zdhhc8	-0.71568	8.14E-90	4.41E-87
Nmt2	Zdhhc8	0.71563	8.49E-90	4.60E-87
Gm38393	Golga7b	0.71561	8.66E-90	4.69E-87
Nptx1	Golga7b	0.71559	8.80E-90	4.76E-87
B4galt5	Zdhhc8	0.71554	9.14E-90	4.94E-87
Gm38393	Zdhhc8	0.71552	9.32E-90	5.04E-87
Mfn2	Zdhhc8	0.71551	9.40E-90	5.07E-87
Mtus2	Zdhhc8	0.71548	9.62E-90	5.19E-87
Snrpb	Zdhhc8	-0.71548	9.66E-90	5.21E-87
Tef	Selk	-0.71542	1.01E-89	5.47E-87
Ralgapa1	Zdhhc5	0.71541	1.02E-89	5.49E-87
Agpat1	Zdhhc8	0.71535	1.07E-89	5.78E-87
Pom121	Golga7b	0.71534	1.08E-89	5.80E-87
B4galt5	Zdhhc5	0.71532	1.10E-89	5.89E-87
Cplx1	Zdhhc21	0.71526	1.15E-89	6.18E-87
Gabarap	Golga7b	-0.71522	1.19E-89	6.42E-87
Rab11fip4	Zdhhc8	0.71521	1.21E-89	6.47E-87
Rtn3	Zdhhc21	0.71521	1.21E-89	6.48E-87
Hist1h1c	Zdhhc21	-0.71520	1.22E-89	6.53E-87
Nlk	Zdhhc8	0.71519	1.22E-89	6.55E-87
A830010M20Rik	Golga7b	0.71518	1.23E-89	6.59E-87
Ppm1k	Golga7b	0.71517	1.24E-89	6.65E-87
Gbf1	Zdhhc5	0.71515	1.26E-89	6.75E-87
Kifap3	Golga7b	0.71507	1.35E-89	7.22E-87
Tmem50a	Zdhhc8	-0.71503	1.40E-89	7.47E-87
Cntnap1	Golga7b	0.71498	1.46E-89	7.77E-87
Brsk1	Zdhhc21	0.71494	1.50E-89	7.99E-87
Usp9x	Zdhhc21	0.71489	1.56E-89	8.33E-87
Tubg2	Golga7b	0.71489	1.56E-89	8.33E-87
Srrm4	Golga7b	0.71487	1.60E-89	8.52E-87
Ptprn	Zdhhc8	0.71486	1.60E-89	8.54E-87
Cmtr1	Golga7b	0.71485	1.62E-89	8.61E-87
Ubr3	Zdhhc21	0.71482	1.66E-89	8.84E-87
Synj1	Selk	-0.71473	1.79E-89	9.50E-87
Atp2b2	Selk	-0.71471	1.82E-89	9.66E-87
Agtpbp1	Zdhhc21	0.71470	1.83E-89	9.72E-87
Mrpl33	Zdhhc21	-0.71467	1.87E-89	9.94E-87
Rb1cc1	Golga7b	0.71466	1.90E-89	1.01E-86
Stxbp5	Zdhhc8	0.71462	1.96E-89	1.04E-86
Kif5a	Golga7b	0.71461	1.98E-89	1.05E-86
Vezt	Zdhhc21	0.71456	2.05E-89	1.09E-86
Lrrc58	Selk	0.71450	2.17E-89	1.15E-86
Abhd8	Golga7b	0.71447	2.22E-89	1.17E-86
Arfgef1	Selk	-0.71445	2.26E-89	1.19E-86
Slc17a9	Selk	-0.71444	2.27E-89	1.20E-86
Snrpg	Zdhhc21	-0.71443	2.29E-89	1.21E-86
Serf2	Golga7b	-0.71441	2.32E-89	1.22E-86
Tmem178b	Golga7b	0.71437	2.41E-89	1.27E-86
Syt16	Golga7b	0.71427	2.60E-89	1.37E-86
Epm2aip1	Zdhhc21	0.71426	2.64E-89	1.39E-86
Mgat3	Zdhhc8	0.71425	2.65E-89	1.39E-86
H2afj	Selk	0.71422	2.72E-89	1.43E-86
Rbfox1	Golga7b	0.71421	2.75E-89	1.44E-86
Tmem8b	Zdhhc21	0.71418	2.80E-89	1.47E-86
Coro1a	Golga7b	0.71415	2.87E-89	1.51E-86
Zmiz2	Selk	-0.71413	2.93E-89	1.54E-86
Nrg3	Zdhhc8	0.71411	2.98E-89	1.56E-86
Bend6	Zdhhc21	0.71404	3.15E-89	1.65E-86
Cacng2	Golga7b	0.71403	3.17E-89	1.66E-86
Ackr1	Zdhhc8	0.71403	3.19E-89	1.67E-86
Prdx1	Zdhhc5	-0.71400	3.25E-89	1.70E-86
Rpl18a	Zdhhc21	-0.71386	3.67E-89	1.91E-86
Clasp1	Zdhhc21	0.71385	3.67E-89	1.92E-86
Rab9	Selk	0.71379	3.86E-89	2.01E-86
Lrrc4b	Zdhhc21	0.71378	3.89E-89	2.03E-86
Gnao1	Zdhhc21	0.71370	4.18E-89	2.18E-86
Slitrk1	Zdhhc8	0.71366	4.31E-89	2.24E-86
Smim11	Selk	0.71366	4.33E-89	2.25E-86
Fam96b	Selk	0.71365	4.35E-89	2.26E-86
Cox20	Selk	0.71364	4.37E-89	2.27E-86
Camsap1	Selk	-0.71363	4.41E-89	2.29E-86
Dst	Zdhhc8	0.71358	4.58E-89	2.38E-86
Gm2000	Zdhhc21	-0.71353	4.80E-89	2.49E-86
Sncb	Zdhhc21	0.71351	4.88E-89	2.53E-86
Dcaf5	Zdhhc21	0.71348	4.98E-89	2.58E-86
Vps13a	Zdhhc8	0.71347	5.03E-89	2.61E-86
Map3k9	Zdhhc5	0.71344	5.15E-89	2.67E-86
Tbcb	Selk	0.71340	5.35E-89	2.77E-86
Srp14	Zdhhc8	-0.71336	5.53E-89	2.86E-86
Rps24	Zdhhc21	-0.71334	5.62E-89	2.90E-86
Actb	Selk	0.71329	5.82E-89	3.00E-86
Scrt1	Zdhhc5	0.71329	5.83E-89	3.01E-86
Sacs	Selk	-0.71328	5.88E-89	3.03E-86
Rnft2	Golga7b	0.71321	6.23E-89	3.21E-86
Trerf1	Selk	-0.71320	6.27E-89	3.23E-86
Bzrap1	Golga7b	0.71318	6.37E-89	3.28E-86
Ybx1	Golga7b	-0.71317	6.45E-89	3.32E-86
Purb	Golga7b	0.71309	6.86E-89	3.53E-86
Timm10b	Selk	0.71302	7.28E-89	3.74E-86
Dync1h1	Zdhhc21	0.71300	7.40E-89	3.80E-86
Panx2	Golga7b	0.71299	7.47E-89	3.83E-86
Sept2	Golga7b	-0.71296	7.62E-89	3.91E-86
Cnnm1	Golga7b	0.71295	7.70E-89	3.95E-86
Tmem127	Zdhhc5	0.71294	7.78E-89	3.99E-86
Zbtb11	Golga7b	0.71290	8.06E-89	4.13E-86
Prkce	Zdhhc21	0.71284	8.41E-89	4.30E-86
Gm38393	Zdhhc21	0.71284	8.42E-89	4.31E-86
Map1a	Zdhhc21	0.71283	8.54E-89	4.36E-86
Kcnj3	Golga7b	0.71275	9.06E-89	4.63E-86
Vps13b	Zdhhc8	0.71266	9.73E-89	4.97E-86
Dnajb14	Zdhhc8	0.71264	9.96E-89	5.08E-86
Sptssa	Zdhhc21	-0.71256	1.06E-88	5.41E-86
Frrs1l	Zdhhc21	0.71255	1.07E-88	5.45E-86
Dpm3	Zdhhc21	-0.71250	1.12E-88	5.69E-86
Kcnc3	Zdhhc21	0.71247	1.14E-88	5.81E-86
Ndufa3	Zdhhc8	-0.71247	1.14E-88	5.81E-86
Sbno1	Golga7b	0.71244	1.17E-88	5.93E-86
Raph1	Zdhhc8	0.71243	1.18E-88	5.99E-86
Nckap1	Golga7b	0.71233	1.28E-88	6.51E-86
B4galt6	Zdhhc8	0.71231	1.30E-88	6.62E-86
Zzef1	Selk	-0.71228	1.33E-88	6.73E-86
Rps10	Selk	0.71226	1.35E-88	6.85E-86
Etfb	Zdhhc21	-0.71225	1.36E-88	6.90E-86
Dnajc19	Zdhhc8	-0.71225	1.37E-88	6.94E-86
Sgsm1	Zdhhc8	0.71224	1.38E-88	6.98E-86
Dlg4	Selk	-0.71224	1.38E-88	6.99E-86
Osbp2	Golga7b	0.71222	1.39E-88	7.05E-86
Sgtb	Zdhhc21	0.71220	1.42E-88	7.16E-86
Atp6v0e	Golga7b	-0.71218	1.44E-88	7.27E-86
Gls2	Golga7b	0.71215	1.48E-88	7.45E-86
Arhgef4	Golga7b	0.71212	1.52E-88	7.66E-86
Fam160a2	Zdhhc8	0.71211	1.52E-88	7.69E-86
Chst1	Golga7b	0.71210	1.54E-88	7.78E-86
Tomm7	Zdhhc21	-0.71209	1.56E-88	7.85E-86
Ptpn5	Golga7b	0.71207	1.58E-88	7.97E-86
Cacnb4	Golga7b	0.71204	1.61E-88	8.12E-86
Gatsl2	Zdhhc5	0.71202	1.64E-88	8.25E-86
Cnih2	Golga7b	0.71199	1.68E-88	8.46E-86
Rnf14	Zdhhc21	0.71191	1.81E-88	9.07E-86
Nlgn2	Zdhhc8	0.71189	1.83E-88	9.20E-86
Micu3	Zdhhc8	0.71188	1.85E-88	9.25E-86
Tmem8b	Selk	-0.71188	1.85E-88	9.25E-86
Slc23a2	Zdhhc21	0.71186	1.87E-88	9.39E-86
Clasp1	Golga7b	0.71183	1.92E-88	9.61E-86
Scn1a	Zdhhc5	0.71183	1.93E-88	9.64E-86
C2cd2l	Golga7b	0.71181	1.95E-88	9.77E-86
Fgf12	Golga7b	0.71180	1.97E-88	9.86E-86
Brinp2	Golga7b	0.71178	2.00E-88	9.98E-86
Uqcrq	Selk	0.71177	2.02E-88	1.01E-85
Zranb1	Zdhhc21	0.71174	2.06E-88	1.03E-85
2700060E02Rik	Selk	0.71171	2.11E-88	1.05E-85
Dagla	Golga7b	0.71171	2.12E-88	1.06E-85
Pde4dip	Zdhhc8	0.71169	2.15E-88	1.07E-85
Necab3	Golga7b	0.71169	2.16E-88	1.07E-85
Cyp4x1	Zdhhc21	0.71169	2.16E-88	1.08E-85
Clstn3	Zdhhc5	0.71168	2.17E-88	1.08E-85
Fam169a	Zdhhc21	0.71168	2.17E-88	1.08E-85
Gabarap	Zdhhc21	-0.71167	2.19E-88	1.09E-85
Rgs11	Golga7b	0.71167	2.20E-88	1.09E-85
Gtf2b	Selk	0.71166	2.20E-88	1.09E-85
Habp4	Golga7b	0.71166	2.21E-88	1.10E-85
Scrt1	Zdhhc21	0.71164	2.24E-88	1.11E-85
Prkce	Zdhhc8	0.71158	2.36E-88	1.17E-85
Fbxo41	Selk	-0.71152	2.47E-88	1.22E-85
Fam126b	Selk	-0.71151	2.50E-88	1.24E-85
Cnih4	Golga7b	-0.71141	2.71E-88	1.34E-85
Abi2	Golga7b	0.71140	2.72E-88	1.34E-85
Josd1	Golga7b	0.71139	2.74E-88	1.35E-85
Srsf12	Golga7b	0.71139	2.75E-88	1.36E-85
Gabra1	Golga7b	0.71137	2.80E-88	1.38E-85
Cox17	Zdhhc8	-0.71136	2.81E-88	1.38E-85
Snx3	Selk	0.71132	2.91E-88	1.43E-85
Gpr162	Selk	-0.71128	3.00E-88	1.48E-85
Rpl35	Zdhhc8	-0.71128	3.00E-88	1.48E-85
Fam134a	Zdhhc8	0.71125	3.07E-88	1.51E-85
Mast2	Zdhhc5	0.71123	3.13E-88	1.54E-85
Actb	Zdhhc8	-0.71122	3.17E-88	1.56E-85
Sec13	Zdhhc8	-0.71120	3.22E-88	1.58E-85
Uhrf1bp1l	Golga7b	0.71117	3.29E-88	1.61E-85
Fam219a	Golga7b	0.71106	3.58E-88	1.76E-85
Lamp1	Zdhhc8	-0.71102	3.70E-88	1.81E-85
Usp32	Golga7b	0.71102	3.70E-88	1.81E-85
Fabp3	Golga7b	0.71095	3.93E-88	1.92E-85
Dnajb5	Golga7b	0.71095	3.94E-88	1.93E-85
Apc2	Zdhhc8	0.71092	4.02E-88	1.97E-85
Vkorc1	Zdhhc8	-0.71088	4.17E-88	2.04E-85
Cacna1b	Selk	-0.71084	4.30E-88	2.10E-85
Nefh	Selk	-0.71082	4.37E-88	2.14E-85
Pfn1	Golga7b	-0.71078	4.49E-88	2.19E-85
Napb	Zdhhc8	0.71076	4.59E-88	2.24E-85
Wdr7	Zdhhc8	0.71074	4.66E-88	2.27E-85
Trim66	Zdhhc8	0.71074	4.67E-88	2.28E-85
Peg3	Zdhhc8	0.71072	4.72E-88	2.30E-85
Gm16485	Zdhhc8	0.71072	4.73E-88	2.30E-85
Syt5	Golga7b	0.71070	4.82E-88	2.34E-85
Tbc1d24	Selk	-0.71066	4.96E-88	2.41E-85
Zfp644	Zdhhc8	0.71066	4.97E-88	2.42E-85
Cacnb4	Zdhhc17	0.71064	5.06E-88	2.46E-85
Ppm1e	Golga7b	0.71059	5.27E-88	2.56E-85
Arfgef1	Golga7b	0.71056	5.37E-88	2.60E-85
Cwc15	Zdhhc5	-0.71055	5.42E-88	2.63E-85
Wipf2	Zdhhc8	0.71049	5.69E-88	2.76E-85
Kmt2a	Golga7b	0.71048	5.73E-88	2.78E-85
Lpin2	Zdhhc8	0.71047	5.82E-88	2.82E-85
B830012L14Rik	Selk	-0.71038	6.24E-88	3.02E-85
Fam126b	Zdhhc5	0.71033	6.49E-88	3.14E-85
Slc45a1	Zdhhc8	0.71032	6.54E-88	3.16E-85
Leprot	Selk	0.71031	6.60E-88	3.19E-85
Ccdc92	Golga7b	0.71026	6.86E-88	3.31E-85
Uqcr10	Selk	0.71024	7.00E-88	3.38E-85
Flywch1	Zdhhc5	0.71021	7.17E-88	3.46E-85
Fmnl1	Golga7b	0.71020	7.20E-88	3.47E-85
Mmp24	Golga7b	0.71017	7.38E-88	3.55E-85
Rell2	Zdhhc5	0.71013	7.64E-88	3.68E-85
Ric3	Golga7b	0.71009	7.89E-88	3.80E-85
Clec16a	Zdhhc8	0.71005	8.12E-88	3.90E-85
Map3k12	Zdhhc8	0.71003	8.26E-88	3.97E-85
Ybx1	Selk	0.70999	8.53E-88	4.10E-85
Cst3	Zdhhc8	-0.70995	8.82E-88	4.23E-85
Ptprs	Selk	-0.70994	8.91E-88	4.27E-85
Clvs2	Golga7b	0.70984	9.64E-88	4.62E-85
Shc2	Zdhhc8	0.70976	1.03E-87	4.93E-85
Prrc2b	Selk	-0.70975	1.04E-87	4.97E-85
Wasf2	Zdhhc21	-0.70970	1.08E-87	5.16E-85
Nmt2	Zdhhc21	0.70968	1.10E-87	5.27E-85
Med31	Selk	0.70967	1.10E-87	5.28E-85
Sec61b	Zdhhc21	-0.70961	1.16E-87	5.54E-85
Cldnd1	Selk	0.70960	1.17E-87	5.57E-85
Polr2f	Zdhhc8	-0.70959	1.18E-87	5.64E-85
Tcf20	Golga7b	0.70957	1.19E-87	5.70E-85
Mtus2	Golga7b	0.70956	1.21E-87	5.76E-85
B4galnt4	Golga7b	0.70956	1.21E-87	5.76E-85
Tnpo2	Golga7b	0.70952	1.25E-87	5.93E-85
Adrbk1	Golga7b	0.70950	1.27E-87	6.06E-85
Soga3	Zdhhc21	0.70950	1.27E-87	6.06E-85
Map1b	Selk	-0.70949	1.28E-87	6.08E-85
Fam131a	Golga7b	0.70946	1.31E-87	6.22E-85
Echs1	Zdhhc8	-0.70944	1.33E-87	6.31E-85
Plxna1	Zdhhc8	0.70944	1.33E-87	6.32E-85
Zfr	Golga7b	0.70941	1.37E-87	6.48E-85
Cdk10	Selk	-0.70939	1.38E-87	6.55E-85
Klc2	Selk	-0.70939	1.39E-87	6.57E-85
Uqcr10	Zdhhc8	-0.70939	1.39E-87	6.58E-85
Fam189a1	Golga7b	0.70938	1.39E-87	6.60E-85
Phlpp2	Zdhhc21	0.70936	1.42E-87	6.70E-85
Bcl11a	Golga7b	0.70936	1.42E-87	6.73E-85
Vsnl1	Zdhhc21	0.70935	1.43E-87	6.78E-85
Rps4x	Selk	0.70921	1.60E-87	7.57E-85
Fbxo45	Golga7b	0.70917	1.66E-87	7.84E-85
Ube2m	Selk	-0.70913	1.71E-87	8.09E-85
Fut9	Golga7b	0.70912	1.72E-87	8.14E-85
Arhgap26	Zdhhc8	0.70911	1.74E-87	8.21E-85
Cep170b	Zdhhc21	0.70910	1.75E-87	8.25E-85
Ugcg	Zdhhc5	0.70906	1.81E-87	8.52E-85
Tsc1	Zdhhc8	0.70903	1.85E-87	8.69E-85
Osgep	Zdhhc8	-0.70902	1.87E-87	8.80E-85
Uhrf1bp1l	Zdhhc21	0.70901	1.88E-87	8.82E-85
Yif1a	Golga7b	-0.70901	1.89E-87	8.88E-85
Nat8l	Zdhhc5	0.70895	1.97E-87	9.24E-85
Ash1l	Golga7b	0.70892	2.03E-87	9.52E-85
Adarb1	Zdhhc8	0.70891	2.04E-87	9.58E-85
Pde4a	Selk	-0.70885	2.14E-87	1.00E-84
Ndufb7	Zdhhc8	-0.70884	2.15E-87	1.01E-84
Ttc7b	Zdhhc8	0.70883	2.18E-87	1.02E-84
Adgrb2	Zdhhc8	0.70882	2.18E-87	1.02E-84
Prkacb	Golga7b	0.70869	2.44E-87	1.14E-84
Iqsec1	Zdhhc21	0.70868	2.46E-87	1.15E-84
Rab26	Golga7b	0.70866	2.49E-87	1.16E-84
Lppr2	Zdhhc8	0.70866	2.50E-87	1.17E-84
Atp1a3	Golga7b	0.70865	2.51E-87	1.17E-84
Scrt1	Zdhhc8	0.70862	2.57E-87	1.20E-84
Txndc17	Zdhhc8	-0.70862	2.58E-87	1.20E-84
Gsk3b	Zdhhc8	0.70862	2.58E-87	1.20E-84
Herc3	Zdhhc8	0.70861	2.59E-87	1.21E-84
Fbxo33	Zdhhc5	0.70861	2.60E-87	1.21E-84
Romo1	Zdhhc8	-0.70861	2.60E-87	1.21E-84
Rps18	Zdhhc21	-0.70858	2.65E-87	1.24E-84
Cpeb3	Zdhhc5	0.70857	2.68E-87	1.25E-84
Tmem258	Zdhhc5	-0.70855	2.71E-87	1.26E-84
Nsmce1	Selk	0.70854	2.73E-87	1.27E-84
Nol6	Golga7b	0.70850	2.83E-87	1.31E-84
Gabrg2	Zdhhc21	0.70848	2.87E-87	1.33E-84
Bola2	Selk	0.70844	2.97E-87	1.38E-84
Ccdc28a	Golga7b	0.70844	2.98E-87	1.38E-84
Amigo1	Zdhhc21	0.70838	3.11E-87	1.44E-84
Pak3	Zdhhc21	0.70838	3.12E-87	1.44E-84
Lmbrd2	Golga7b	0.70828	3.39E-87	1.57E-84
Akap11	Golga7b	0.70823	3.52E-87	1.63E-84
H2afv	Zdhhc8	-0.70820	3.62E-87	1.67E-84
Dgke	Zdhhc21	0.70819	3.62E-87	1.67E-84
Scrt1	Selk	-0.70818	3.66E-87	1.69E-84
Kcnb1	Zdhhc8	0.70818	3.66E-87	1.69E-84
Kcnb2	Zdhhc8	0.70812	3.86E-87	1.78E-84
Fam43b	Zdhhc8	0.70810	3.92E-87	1.81E-84
Myeov2	Zdhhc8	-0.70806	4.05E-87	1.87E-84
Lemd3	Zdhhc21	0.70801	4.19E-87	1.93E-84
Got1	Golga7b	0.70801	4.19E-87	1.93E-84
Usp34	Selk	-0.70794	4.43E-87	2.04E-84
Kcnq1ot1	Zdhhc8	0.70788	4.67E-87	2.15E-84
Gas5	Zdhhc8	-0.70782	4.87E-87	2.24E-84
Dmxl1	Selk	-0.70779	5.02E-87	2.31E-84
Cnbp	Selk	0.70778	5.04E-87	2.32E-84
Kcnj9	Zdhhc21	0.70777	5.07E-87	2.33E-84
Scn1b	Selk	-0.70775	5.17E-87	2.37E-84
9330159F19Rik	Zdhhc8	0.70764	5.64E-87	2.59E-84
Kif5a	Zdhhc21	0.70754	6.10E-87	2.79E-84
Ssbp3	Golga7b	0.70754	6.12E-87	2.80E-84
Dhx57	Golga7b	0.70753	6.15E-87	2.82E-84
Elavl4	Zdhhc21	0.70748	6.42E-87	2.94E-84
Mapk1	Golga7b	0.70743	6.70E-87	3.06E-84
Ylpm1	Zdhhc8	0.70738	6.97E-87	3.19E-84
Gatsl2	Selk	-0.70733	7.21E-87	3.30E-84
Mocs2	Selk	0.70730	7.39E-87	3.37E-84
1810043H04Rik	Zdhhc21	-0.70723	7.81E-87	3.56E-84
Tro	Golga7b	0.70723	7.82E-87	3.57E-84
Atp8b2	Zdhhc8	0.70719	8.11E-87	3.70E-84
Fam193b	Zdhhc8	0.70717	8.19E-87	3.73E-84
Atp5e	Zdhhc21	-0.70717	8.23E-87	3.75E-84
Gnaq	Zdhhc21	0.70715	8.34E-87	3.80E-84
Dzip3	Zdhhc21	0.70711	8.60E-87	3.91E-84
Gtf3c6	Zdhhc8	-0.70709	8.76E-87	3.98E-84
Ilk	Zdhhc8	-0.70704	9.08E-87	4.13E-84
Snrpn	Golga7b	0.70700	9.41E-87	4.27E-84
B4galt2	Zdhhc8	0.70699	9.47E-87	4.30E-84
Map2	Golga7b	0.70698	9.56E-87	4.34E-84
Clic4	Golga7b	-0.70685	1.06E-86	4.80E-84
Chd3	Golga7b	0.70683	1.08E-86	4.89E-84
Bean1	Zdhhc8	0.70676	1.13E-86	5.14E-84
Cit	Zdhhc8	0.70674	1.16E-86	5.26E-84
Rps26	Selk	0.70670	1.20E-86	5.42E-84
Pdzd4	Zdhhc8	0.70670	1.20E-86	5.42E-84
Zranb1	Zdhhc8	0.70668	1.22E-86	5.51E-84
Gdap1	Zdhhc8	0.70667	1.23E-86	5.54E-84
Tcf25	Zdhhc8	0.70664	1.26E-86	5.67E-84
Clcn4-2	Zdhhc21	0.70658	1.31E-86	5.93E-84
Rpl7	Zdhhc21	-0.70656	1.33E-86	6.00E-84
Eif4g3	Golga7b	0.70654	1.36E-86	6.11E-84
Rab3a	Golga7b	0.70653	1.37E-86	6.16E-84
Cntnap1	Selk	-0.70652	1.38E-86	6.22E-84
Tef	Zdhhc8	0.70649	1.41E-86	6.35E-84
Pttg1ip	Zdhhc21	-0.70648	1.42E-86	6.40E-84
Rpl23	Zdhhc21	-0.70643	1.47E-86	6.63E-84
Atp6v0a1	Selk	-0.70642	1.49E-86	6.71E-84
Ap2a2	Golga7b	0.70641	1.50E-86	6.74E-84
Ssbp1	Selk	0.70636	1.57E-86	7.05E-84
Snhg11	Zdhhc21	0.70635	1.58E-86	7.08E-84
Tmem169	Zdhhc21	0.70626	1.70E-86	7.61E-84
Bicd1	Zdhhc21	0.70626	1.70E-86	7.63E-84
Pip5k1c	Golga7b	0.70623	1.73E-86	7.78E-84
Kcnc3	Selk	-0.70622	1.75E-86	7.83E-84
Meg3	Zdhhc21	0.70620	1.78E-86	7.99E-84
Txndc17	Zdhhc21	-0.70618	1.80E-86	8.06E-84
Tsc1	Selk	-0.70617	1.82E-86	8.16E-84
Rptor	Zdhhc8	0.70614	1.87E-86	8.37E-84
Rian	Zdhhc5	0.70612	1.90E-86	8.50E-84
D8Ertd738e	Zdhhc21	-0.70606	1.98E-86	8.86E-84
Tesk1	Zdhhc5	0.70599	2.09E-86	9.35E-84
Camta1	Zdhhc8	0.70597	2.14E-86	9.54E-84
Nktr	Zdhhc5	0.70596	2.16E-86	9.62E-84
Socs7	Zdhhc8	0.70592	2.23E-86	9.92E-84
Lmtk3	Zdhhc21	0.70588	2.30E-86	1.02E-83
Dgkz	Golga7b	0.70587	2.32E-86	1.03E-83
Fam73a	Zdhhc21	0.70584	2.36E-86	1.05E-83
Cbx6	Golga7b	0.70575	2.54E-86	1.13E-83
Myh10	Selk	-0.70570	2.64E-86	1.17E-83
Ncam1	Zdhhc2	0.70567	2.70E-86	1.20E-83
Faim2	Zdhhc21	0.70564	2.76E-86	1.23E-83
Pak6	Golga7b	0.70564	2.77E-86	1.23E-83
Eif4g3	Zdhhc5	0.70561	2.83E-86	1.26E-83
Anapc16	Selk	0.70557	2.93E-86	1.30E-83
Echs1	Selk	0.70555	2.99E-86	1.32E-83
Tspyl1	Golga7b	0.70552	3.05E-86	1.35E-83
Snap47	Golga7b	0.70551	3.07E-86	1.36E-83
Mrpl18	Zdhhc8	-0.70544	3.24E-86	1.43E-83
Rims4	Zdhhc8	0.70544	3.25E-86	1.44E-83
Arhgap32	Zdhhc21	0.70542	3.31E-86	1.47E-83
A230006K03Rik	Zdhhc8	0.70536	3.46E-86	1.53E-83
H3f3a	Selk	0.70536	3.46E-86	1.53E-83
Btrc	Golga7b	0.70531	3.61E-86	1.59E-83
Camk4	Golga7b	0.70527	3.73E-86	1.65E-83
Tmem240	Selk	-0.70523	3.84E-86	1.69E-83
Rpl30	Zdhhc8	-0.70522	3.85E-86	1.70E-83
Bet1	Selk	0.70522	3.86E-86	1.70E-83
Larp4b	Golga7b	0.70520	3.92E-86	1.72E-83
Crmp1	Golga7b	0.70518	3.98E-86	1.75E-83
Psmc3	Selk	0.70517	4.01E-86	1.76E-83
Mrpl42	Selk	0.70515	4.08E-86	1.79E-83
Kif3c	Zdhhc21	0.70513	4.17E-86	1.83E-83
Gcc2	Zdhhc21	0.70512	4.20E-86	1.84E-83
Slc4a3	Zdhhc8	0.70511	4.23E-86	1.86E-83
Gpr61	Golga7b	0.70506	4.40E-86	1.93E-83
[truncated: 212 more rows]
