# Supplementary material for: Exploring the expression patterns of palmitoylating and de-palmitoylating enzymes in the mouse brain using the curated RNA-seq database BrainPalmSeq
Source: eLife. 2022 Jul 12;11:e75804. doi: 10.7554/eLife.75804 (PMC9365392; doi:10.7554/eLife.75804)
Supplement: Figure 1—source data 2. [file elife-75804-fig1-data2.xlsx]

## Sheet: Figure 1 Source data 2
Figure 1 Source data 2: ZDHHC cell type averages from ‘MouseBrain’ dataset (related to Figure 1B)
Index	1	2	3	4	5	6	7	8	9	10	11	12	13	14	15	16	17	18	19	20	21	22	23	24	25	26	27	28	29	30	31	32	33	34	35	36	37	38	39
Cell Type	Astrocytes	Cerebellum neurons	Cholinergic and monoaminergic neurons	Choroid epithelial cells	Dentate gyrus granule neurons	Dentate gyrus radial glia-like cells	Di- and mesencephalon excitatory neurons	Di- and mesencephalon inhibitory neurons	Enteric glia	Enteric neurons	Ependymal cells	Glutamatergic neuroblasts	Hindbrain neurons	Microglia	Non-glutamatergic neuroblasts	Olfactory ensheathing cells	Olfactory inhibitory neurons	Oligodendrocyte precursor cells	Oligodendrocytes	Peptidergic neurons	Pericytes	Peripheral sensory neurofilament neurons	Peripheral sensory non-peptidergic neurons	Peripheral sensory peptidergic neurons	Perivascular macrophages	Satellite glia	Schwann cells	Spinal cord excitatory neurons	Spinal cord inhibitory neurons	Subcommissural organ hypendymal cells	Subventricular zone radial glia-like cells	Sympathetic cholinergic neurons	Sympathetic noradrenergic neurons	Telencephalon inhibitory interneurons	Telencephalon projecting excitatory neurons	Telencephalon projecting inhibitory neurons	Vascular and leptomeningeal cells	Vascular endothelial cells	Vascular smooth muscle cells
Number of cells	19377	5292	1071	458	4368	327	6455	4026	10535	1105	1257	644	1144	5425	4822	2031	5191	820	30253	2906	5213	126	889	565	2029	684	47	1166	756	111	756	90	796	8637	18799	5691	1501	3805	1628
Cell ID	Astro	CB neur	Chol/mono neur	Chor epi	DG gran neur	DG rad glia	Di/mes-encep ex neur	Di/mes-encep in neur	Ent glia	Ent neur	Ependy	Glu NB	HB neur	Micro	Non-Glu NB	Olf EC	Olf Inhib neur	OPC	Oligo	Pept neur	Peri	Sens NF neur	Sens non-pept neur	Sens pept neur	Peri macro	Sat glia	Schwann	SC ex neur	SC inhib neur	SCO hyp	SV rad glia	Symp chol neur	Symp nor neur	Tel inhib interneur	Tel ex proj neur	Tel inhib proj neur	Vasc lepto	Vasc endo	Vasc SM
Zdhhc1	0.0734837	0.0410246	0.0945608	0.149044	0.0689826	0.122942	0.0940323	0.0986503	0.161456	0.172605	0.409029	0.0756677	0.145932	0.0142919	0.0470189	0.252623	0.0930016	0.0659123	0.0456453	0.0820743	0.264015	0.130428	0.125338	0.088657	0.00600572	0.105514	0	0.0627988	0.0908903	0.312643	0.0927511	0.114341	0.10871	0.0919559	0.0837636	0.0571223	0.0751955	0.0810028	0.177439
Zdhhc2	0.06801	0.130426	0.964945	0.0127997	0.0747815	0.0191369	0.515762	0.38972	1.18329	1.04678	0.092274	0.125924	0.38151	0.016734	0.0680585	0.529641	0.15448	0.600259	0.166227	0.31821	0.0187916	1.80776	2.13082	1.23343	0.0320078	0.953277	0.612244	0.322784	0.206621	0	0.0390226	0.638476	0.720146	0.516058	0.447089	0.241047	0.0250525	0.0126035	0.042225
Zdhhc3	0.160546	0.15908	0.472085	0.12775	0.285702	0.192144	0.56977	0.615806	0.281706	0.404632	0.25651	0.421699	0.769235	0.122326	0.243932	0.267212	0.28267	0.301961	0.294897	0.331897	0.379958	0.713484	0.900677	0.597089	0.121123	0.297163	0.540218	0.389181	0.369218	0.106705	0.169694	0.424314	0.390307	0.493588	0.575459	0.304915	0.25709	0.359486	0.172088
Zdhhc4	0.188584	0.0559599	0.147117	0.14917	0.192844	0.262625	0.15291	0.110887	0.276353	0.305889	0.398175	0.124094	0.131268	0.0764546	0.149854	0.251191	0.130576	0.253886	0.280231	0.114377	0.329381	0.412643	0.486092	0.347406	0.0670556	0.281319	0.191311	0.198444	0.171989	0.348775	0.258876	0.370124	0.426473	0.11684	0.174923	0.163231	0.230922	0.294441	0.212201
Zdhhc5	0.0612066	0.0340642	0.218264	0.131384	0.0352303	0	0.211186	0.228469	0.0687667	0.114713	0.0688172	0.147695	0.237596	0.0329363	0.0259342	0.0638326	0.057969	0.0648068	0.0431471	0.119296	0.101616	0.141439	0.0822867	0.0831887	0.0528757	0.0455391	0	0.0319028	0.0814595	0.0638406	0.0204754	0.176501	0.0936839	0.188057	0.152642	0.0645325	0.0781243	0.0497677	0.065767
Zdhhc6	0.128395	0.0592673	0.172317	0.197404	0.155612	0.261926	0.182817	0.182939	0.166206	0.149967	0.188865	0.131725	0.212759	0.169067	0.185966	0.211796	0.118929	0.359655	0.178874	0.156794	0.243477	0.254577	0.308193	0.215149	0.13043	0.128215	0.0318612	0.106941	0.136934	0.277519	0.135801	0.373595	0.360793	0.181191	0.218518	0.139609	0.274618	0.253646	0.164224
Zdhhc7	0.119407	0.0563538	0.228879	0.0592824	0.122466	0.0586206	0.212838	0.184542	0.159938	0.214687	0.129182	0.130922	0.225375	0.130632	0.0998246	0.109656	0.111516	0.208831	0.160362	0.134987	0.226552	0.477892	0.329696	0.317021	0.149204	0.122566	0.234457	0.0986235	0.169616	0.154586	0.0915586	0.276714	0.282097	0.15102	0.237035	0.172202	0.123133	0.201962	0.133996
Zdhhc8	0.101715	0.0708166	0.51863	0.0697898	0.290935	0.0285909	0.374372	0.295942	0.200238	0.41928	0.132852	0.165322	0.373559	0.0455853	0.0492215	0.085757	0.165483	0.113478	0.156482	0.25853	0.181499	0.630675	0.689853	0.577627	0.0441455	0.148403	0.359067	0.194866	0.180879	0.038695	0.0706183	0.322143	0.260109	0.232996	0.597458	0.269109	0.104125	0.127753	0.151394
Zdhhc9	0.0660671	0.0408072	0.275311	0.238394	0.0615552	0	0.159055	0.120539	0.0538009	0.195867	0.0829719	0.0875696	0.294044	0.0508303	0.0531157	0.028853	0.0613291	0.100943	1.27658	0.0597584	0.199041	0.279045	0.380711	0.297324	0.0909738	0.0296409	0.166263	0.0760123	0.167212	0.0640114	0.0271124	0.206891	0.14225	0.124791	0.192314	0.0675994	0.0573501	0.179221	0.0570722
Zdhhc11	0	0	0	0	0.000503088	0	0	0	0.00115154	0.00119346	0	0	0	0	0	0.00162597	0	0	0	0	0	0.0262219	0.000659193	0	0	0	0	0	0	0	0	0.00896666	0	0	0.000124951	0	0	0	0
Zdhhc12	0.100239	0.0125909	0.06095	0.121748	0.0459765	0.0953116	0.0350589	0.0313507	0.0600935	0.0851256	0.0691247	0.0545627	0.0181274	0.0840223	0.0446471	0.104812	0.0347969	0.150382	0.225367	0.0348485	0.107286	0.00494184	0.390441	0.165772	0.103452	0.0652148	0.0897585	0.0283991	0.0831079	0.0764323	0.0477617	0.291244	0.533799	0.03203	0.0715217	0.0875676	0.072796	0.149572	0.053698
Zdhhc13	0.0328329	0.0278502	0.0785629	0.0915588	0.0546387	0.00927181	0.0554398	0.075662	0.0406485	0.0929704	0.0339813	0.0412657	0.128574	0.0460616	0.0943182	0.0442844	0.0567486	0.0673671	0.038617	0.0397449	0.0234177	0.11695	0.223525	0.089593	0.021264	0.0306291	0.0466949	0.0440374	0.0409822	0	0.0256927	0.0809503	0.103517	0.0551124	0.10646	0.0762461	0.0228804	0.013517	0.0200784
Zdhhc14	0.0385378	0.0539571	0.204655	0.0149652	0.101846	0.0179611	0.236023	0.146079	0.0127935	0.138212	0.0142764	0.0470172	0.166713	0.0245239	0.0201209	0.00350259	0.0735148	0.159113	0.383459	0.192018	0.0350351	0.304622	0.261602	0.125042	0.0524204	0.0590429	0.103005	0.111402	0.231467	0	0.00812672	0.202008	0.173173	0.114012	0.295648	0.375577	0.0246444	0.0236884	0.0405142
Zdhhc15	0.0118987	0.00058276	0.135948	0.00441733	0.0155226	0.0181387	0.039972	0.0240691	0.0389068	0.0752703	0.0130858	0.00906147	0.0464499	0.00112163	0.00748894	0.0168165	0.0122836	0.0515604	0.0134419	0.0345896	0.0171834	0.101471	0.100761	0.10171	0	0.0171789	0	0.024559	0.0197509	0	0	0.125713	0.0851016	0.0203719	0.0406121	0.0230078	0.0179259	0.00852066	0.0158136
Zdhhc16	0.126818	0.13093	0.141496	0.0439829	0.234272	0.174456	0.189479	0.189292	0.208622	0.251491	0.110435	0.194155	0.156398	0.139814	0.283042	0.1224	0.188719	0.38288	0.162784	0.127794	0.217889	0.224869	0.457229	0.383483	0.122034	0.299952	0.229221	0.206845	0.18354	0.0832815	0.119906	0.393209	0.379596	0.204123	0.275094	0.196576	0.199615	0.255715	0.139731
Zdhhc17	0.224409	0.169506	0.6838	0.115631	0.238741	0.0835082	0.704821	0.694155	0.121244	0.439892	0.175369	0.278332	0.842812	0.0360367	0.118438	0.103621	0.328778	0.125325	0.482737	0.431847	0.128897	0.88787	0.58438	0.655466	0.0625521	0.131289	0.119484	0.273671	0.399759	0.0391475	0.103244	0.745529	0.583219	0.480045	0.538071	0.444165	0.0883676	0.0722167	0.108499
Zdhhc18	0.195274	0.0780916	0.195426	0.0792707	0.070178	0.0269878	0.192648	0.162399	0.0394885	0.179496	0.273714	0.193151	0.290424	0.0372278	0.0392264	0.120393	0.0793769	0.0991861	0.0463389	0.103943	0.284566	0.760691	0.824003	0.441718	0.0407154	0.100858	0.0831482	0.0729375	0.134928	0.0221485	0.0791193	0.137243	0.124212	0.109456	0.142675	0.141381	0.0815598	0.244494	0.0784203
Zdhhc19	0	0	0.00182185	0	0	0	0.00013893	0.00037318	0	0	0	0	0	0	0	0	0	0	0.000920586	0	0.000628039	0	0	0	0	0	0	0	0	0	0	0	0	0.000201922	0	0	0	0.00068174	0
Zdhhc20	0.206212	0.120549	0.981215	0.603715	0.272462	0.250407	0.554207	0.742608	0.280254	0.580015	0.303851	0.326543	0.744844	0.363653	0.254676	0.25285	0.269259	0.411569	1.29768	0.610123	0.501021	0.130545	0.299451	0.359764	0.309346	0.17347	0.133578	0.561487	0.522416	0.410062	0.167984	0.419896	0.332034	0.398375	0.439555	0.361048	0.26736	0.471825	0.193645
Zdhhc21	0.166747	0.166183	0.6677	0.272698	0.253377	0.119608	0.588926	0.597114	0.152641	0.66706	0.133276	0.407474	0.911974	0.0465656	0.100737	0.144435	0.180568	0.156536	0.215947	0.340791	0.101122	1.06115	0.786341	0.73171	0.0575251	0.118099	0.113967	0.170128	0.268864	0.13323	0.118975	0.398055	0.409107	0.448507	0.508155	0.211553	0.0978037	0.0814204	0.0698966
Zdhhc22	0.000788905	0.0102872	0.0337476	0	0.0111301	0	0.0209758	0.0135612	0	0.0155838	0	0	0.0127127	0	0.00135761	0.00111694	0	0.0707743	0.000112291	0.00612863	0	0.00530978	0.0204121	0.072992	0	0	0	0.0326423	0.0234397	0	0	0.0320793	0.0418909	0.0292273	0.0162476	0.00768798	0	0	0.00305381
Zdhhc23	0	0.000612806	0.00083036	0	0.00177004	0	0.000504058	0	0	0	0.00420244	0	0	0	0.000902616	0	0	0.00365163	0	0.00107694	0	0	0.00164226	0	0	0	0	0.00107459	0	0	0	0	0	0	0.00349262	0.00318221	0	0	0
Zdhhc24	0.0489638	0.0155481	0.139851	0.117429	0.0501656	0.0240242	0.0794852	0.0885564	0.0325202	0.109416	0.0606703	0.0403	0.132387	0.0209167	0.0219198	0.0546483	0.0256422	0.0652849	0.0991295	0.0442303	0.0396557	0.0153236	0.0617955	0.034258	0.0217821	0.0321534	0	0.0470536	0.0625352	0	0.0124551	0.0481023	0.0632378	0.0662607	0.0889259	0.0385327	0.040691	0.0303365	0.00919608
Zdhhc25	0	0	0	0	0	0	0	0	0	0	0	0	0	0	0	0	0	0	0	0	0	0	0	0	0	0	0	0	0	0	0	0	0	0	0	0	0	0	0
