# Supplementary material for: Exploring the expression patterns of palmitoylating and de-palmitoylating enzymes in the mouse brain using the curated RNA-seq database BrainPalmSeq
Source: eLife. 2022 Jul 12;11:e75804. doi: 10.7554/eLife.75804 (PMC9365392; doi:10.7554/eLife.75804)
Supplement: Figure 1—source data 3. [file elife-75804-fig1-data3.xlsx]

## Sheet: Figure 1_Source data 3
Figure 1 Source data 3: ZDHHC neurotransmitter averages from ‘MouseBrain’ dataset (related to Figure 1C)
Index	1	2	3	4	5	6	7	8	9	10	11	12	13	14	15	16	17	18	19	20	21	22	23
Neurotransmitter	Acetylcholine	Acetylcholine,Glutamate	Acetylcholine,Glutamate,Nitric oxide	Acetylcholine,Nitric oxide	Acetylcholine,Noradrenaline	Adrenaline,Glutamate	Dopamine	GABA	GABA,Dopamine	GABA,Glutamate	GABA,Glutamate,Nitric oxide	GABA,Glycine	GABA,Glycine,Nitric oxide	GABA,Nitric oxide	Glutamate	Glutamate,Acetylcholine	Glutamate,Acetylcholine,Nitric oxide	Glutamate,Nitric oxide	Nitric oxide	Noradrenaline	Noradrenaline,Nitric oxide	Serotonin	Serotonin,Glutamate
Number of cells	763	217	257	124	90	40	120	21434	652	1024	660	1140	87	4924	32889	128	102	5308	449	796	23	151	286
Neurotransmitter ID	ACh	ACh, Glu	ACh, Glu, NO	ACh, NO	ACh, NA	AD, Glu	DA	GABA	GABA, DA	GABA, Glu	GABA, Glu, NO	GABA, Gly	GABA, Gly, NO	GABA, NO	Glu	Glu, ACh	Glu, ACh, NO	Glu, NO	NO	NA	NA, NO	Ser	Ser, Glu
Zdhhc1	0.167574	0.0958692	0.0947155	0.076081	0.114341	0.0606086	0.136511	0.0765021	0.0950478	0.091363	0.0963896	0.120205	0.168829	0.0940141	0.0799543	0.140987	0.0865926	0.0791998	0.149524	0.10871	0.140211	0.0984924	0.0900005
Zdhhc2	0.949015	0.1989	0.75953	1.43092	0.638476	0.985098	0.883607	0.267631	0.169072	0.621078	1.27267	0.417215	0.241874	0.31259	0.413301	1.05008	1.72817	0.508497	0.982101	0.720146	0.824808	0.837133	0.945878
Zdhhc3	0.439737	0.434272	0.56129	0.656271	0.424314	0.554045	0.400626	0.361682	0.316857	0.495129	0.549641	0.637645	0.495276	0.467805	0.479716	0.37037	0.709773	0.592726	0.345677	0.390307	0.24073	0.421621	0.41956
Zdhhc4	0.274863	0.107305	0.159129	0.154867	0.370124	0.0540994	0.110039	0.129507	0.141462	0.118001	0.0967739	0.104327	0.216191	0.114039	0.162514	0.323336	0.380434	0.208082	0.263855	0.426473	0.0606991	0.157319	0.153965
Zdhhc5	0.130563	0.0841954	0.246767	0.274018	0.176501	0.170094	0.146729	0.106053	0.0651628	0.196855	0.229224	0.210502	0.0891884	0.166009	0.127107	0.0947799	0.156298	0.151571	0.0790543	0.0936839	0.235856	0.230217	0.236054
Zdhhc6	0.153968	0.219433	0.27716	0.189068	0.373595	0.114186	0.0761813	0.146454	0.146022	0.204285	0.164627	0.172275	0.248221	0.168047	0.184115	0.152617	0.222819	0.183177	0.13688	0.360793	0.25284	0.169643	0.148447
Zdhhc7	0.184665	0.1079	0.196123	0.346158	0.276714	0.219619	0.141298	0.14415	0.115284	0.157231	0.174425	0.22297	0.317216	0.127882	0.193111	0.377775	0.371126	0.223758	0.204177	0.282097	0	0.310308	0.222979
Zdhhc8	0.447928	0.265638	0.486529	0.663125	0.322143	0.414168	0.295119	0.215978	0.110644	0.232753	0.40285	0.318178	0.342987	0.188623	0.453937	0.363882	0.694241	0.374729	0.381886	0.260109	0.450992	0.520286	0.566203
Zdhhc9	0.200183	0.124852	0.30178	0.39724	0.206891	0.287364	0.127025	0.0797143	0.0841363	0.13439	0.144622	0.232252	0.194568	0.114294	0.153657	0.164088	0.411736	0.165251	0.13576	0.14225	0.26005	0.261134	0.305973
Zdhhc11	0	0	0	0	0.00896666	0	0	0	0	0	0	0	0	0	0.000185091	0	0	0.000442531	0.00293714	0	0	0	0
Zdhhc12	0.0732556	0.0328822	0.0824407	0.105558	0.291244	0	0.0399903	0.0479699	0.0193298	0.0561461	0.019224	0.012782	0.100602	0.03451	0.061707	0.117859	0.176858	0.0612811	0.0757223	0.533799	0.0821493	0.0127201	0.0488087
Zdhhc13	0.0914058	0.0565339	0.0737925	0.161463	0.0809503	0	0.0551281	0.0658564	0.0615947	0.0820757	0.0614451	0.0829851	0.0194442	0.0542987	0.0822231	0.121453	0.0742446	0.0879497	0.0554167	0.103517	0	0.0705494	0.0850409
Zdhhc14	0.128138	0.372835	0.218518	0.305001	0.202008	0.47001	0.10332	0.180471	0.0605988	0.132643	0.211249	0.161485	0.0960379	0.126808	0.207472	0.131117	0.18624	0.271144	0.161399	0.173173	0.201227	0.12198	0.216544
Zdhhc15	0.0599001	0.0435774	0.11813	0.179902	0.125713	0.0557173	0.0846685	0.020049	0.00831898	0.0151047	0.0229826	0.0327179	0	0.0156324	0.0337826	0.0981402	0.122206	0.03878	0.0918739	0.0851015	0	0.117218	0.194305
Zdhhc16	0.242437	0.246466	0.169043	0.170582	0.393209	0.157446	0.014976	0.184775	0.254903	0.220852	0.220267	0.148843	0.167552	0.202168	0.240323	0.347785	0.425869	0.223722	0.180114	0.379596	0.194112	0.129861	0.169761
Zdhhc17	0.439331	0.249969	0.612051	0.930648	0.745529	0.655941	0.453644	0.429035	0.256978	0.503829	0.604491	0.739043	0.492409	0.425004	0.472469	0.452513	0.673232	0.587075	0.428141	0.583219	0.517611	0.613559	0.835852
Zdhhc18	0.182006	0.909671	0.18723	0.2478	0.137243	0.112084	0.131141	0.112792	0.0703348	0.0981975	0.0869517	0.241931	0.117215	0.111083	0.150514	0.174077	0.584616	0.167587	0.143173	0.124212	0.243713	0.26349	0.199814
Zdhhc19	0	0	0	0	0	0	0	8.14e-05	0	0	0	0.00132	0	0	2.73e-05	0	0	0	0	0	0	0	0.00682
Zdhhc20	0.560304	0.316277	0.691165	1.20199	0.419896	1.19614	0.734045	0.405593	0.285325	0.372355	0.479951	0.825106	0.898186	0.416896	0.378284	0.653456	0.363347	0.602048	0.670529	0.332034	0.380698	1.20595	1.15527
Zdhhc21	0.640837	0.313938	0.759317	0.86825	0.398055	0.540503	0.463688	0.294702	0.162199	0.430405	0.567931	0.684496	0.396669	0.432193	0.456587	0.600865	0.85386	0.467901	0.567966	0.409107	0.537764	0.699218	0.67662
Zdhhc22	0.0132591	0.0259105	0.0609585	0.021022	0.0320793	0.038991	0	0.00991038	0	0.0579038	0.0499194	0.00829678	0.0434921	0.0132224	0.0177267	0.0089246	0.0785913	0.0092464	0.0194575	0.0418909	0.189752	0.0468948	0.0133377
Zdhhc23	0	0	0.00346037	0	0	0	0	0.000844916	0	0	0	0	0	0	0.00184313	0	0	0.00473053	0	0	0	0	0
Zdhhc24	0.0750776	0.0686459	0.125682	0.177598	0.0481023	0.110282	0.0705569	0.0432396	0.0374313	0.0641294	0.0840886	0.122338	0.0640862	0.0628175	0.0691795	0.0950683	0.0696826	0.0829847	0.142439	0.0632378	0.140062	0.174465	0.188873
Zdhhc25	0	0	0	0	0	0	0	0	0	0	0	0	0	0	0	0	0	0	0	0	0	0	0
