# Supplementary material for: Exploring the expression patterns of palmitoylating and de-palmitoylating enzymes in the mouse brain using the curated RNA-seq database BrainPalmSeq
Source: eLife. 2022 Jul 12;11:e75804. doi: 10.7554/eLife.75804 (PMC9365392; doi:10.7554/eLife.75804)
Supplement: Figure 1—source data 4. [file elife-75804-fig1-data4.xlsx]

## Sheet: Fig 1D
Figure 1D: Spearman correlations 'MouseBrain' dataset
	Zdhhc1	Zdhhc2	Zdhhc3	Zdhhc4	Zdhhc5	Zdhhc6	Zdhhc7	Zdhhc8	Zdhhc9	Zdhhc11	Zdhhc12	Zdhhc13	Zdhhc14	Zdhhc15	Zdhhc16	Zdhhc17	Zdhhc18	Zdhhc19	Zdhhc20	Zdhhc21	Zdhhc22	Zdhhc23	Zdhhc24	Zdhhc25	Lypla1	Lypla2	Ppt1	Abhd17a	Abhd17b	Abhd17c	Golga7	Golga7b	Selk
Zdhhc1	1	0.225202	0.218359	0.234323	0.24936	0.21167	0.159056	0.234416	0.097198	0.052085	0.012879	0.133236	-0.1883	0.250756	0.033955	0.175816	0.304127	-0.01877	0.164482	0.25299	0.079463	-0.09828	0.154413	NA	0.417269	0.214078	0.155861	0.100793	0.125537	0.060111	0.27561	0.15161	-0.02565
Zdhhc2	0.225202	1	0.432069	0.232073	0.368486	0.197081	0.539711	0.617469	0.436875	0.207262	0.114796	0.433459	0.330454	0.630869	0.28929	0.500137	0.302088	-0.0499	0.275098	0.578635	0.301758	-0.00284	0.301138	NA	0.369741	0.442936	0.219831	0.320022	0.453987	0.149971	0.436347	0.333107	0.169552
Zdhhc3	0.218359	0.432069	1	0.02688	0.594299	0.282839	0.536606	0.644668	0.52845	0.002756	-0.11066	0.477053	0.348309	0.363402	0.327744	0.688774	0.521848	-0.03953	0.392394	0.686221	0.301094	0.108603	0.417533	NA	0.408181	0.587176	0.404983	0.61414	0.439925	0.367249	0.275001	0.635321	-0.01174
Zdhhc4	0.234323	0.232073	0.02688	1	-0.16534	0.326034	0.270493	0.10715	0.177674	0.225645	0.478377	0.118219	-0.00936	0.253795	0.400627	-0.09748	0.1825	0.046159	-0.14827	-0.05057	0.024343	0.055369	-0.01044	NA	0.156771	0.078539	-0.24497	0.156191	0.164821	0.147635	0.414205	-0.11086	0.41217
Zdhhc5	0.24936	0.368486	0.594299	-0.16534	1	0.219046	0.300584	0.492542	0.400074	-0.04863	-0.1878	0.311602	0.321992	0.304003	0.057424	0.643963	0.469118	0.014399	0.419969	0.662569	0.200313	0.020224	0.438934	NA	0.504517	0.460492	0.500452	0.338751	0.235506	0.176864	0.21227	0.478335	-0.10509
Zdhhc6	0.21167	0.197081	0.282839	0.326034	0.219046	1	0.317855	0.253204	0.26225	0.103479	0.368278	0.311365	0.111052	0.233541	0.321887	0.149512	0.262326	0.050532	0.031871	0.222117	0.13525	0.135305	0.187163	NA	0.282537	0.333235	0.051948	0.277365	0.149588	0.141839	0.394479	0.039186	0.285194
Zdhhc7	0.159056	0.539711	0.536606	0.270493	0.300584	0.317855	1	0.63126	0.571318	0.103929	0.23756	0.430318	0.37337	0.50871	0.367273	0.53875	0.366755	0.029181	0.295607	0.528477	0.208556	0.085183	0.33388	NA	0.345962	0.408128	0.174295	0.500448	0.4411	0.383698	0.377545	0.356276	0.050113
Zdhhc8	0.234416	0.617469	0.644668	0.10715	0.492542	0.253204	0.63126	1	0.582776	0.086522	0.048938	0.491377	0.512049	0.63203	0.272965	0.699603	0.515635	-0.01703	0.416831	0.752736	0.341616	0.15969	0.426004	NA	0.317313	0.518677	0.222656	0.611211	0.364149	0.373132	0.246669	0.623858	0.013582
Zdhhc9	0.097198	0.436875	0.52845	0.177674	0.400074	0.26225	0.571318	0.582776	1	-0.01625	0.231203	0.412873	0.477944	0.388569	0.255953	0.610215	0.452935	0.173028	0.401759	0.586184	0.19091	0.037663	0.533431	NA	0.382368	0.407389	0.314415	0.702569	0.57788	0.321552	0.416015	0.401432	0.064009
Zdhhc11	0.052085	0.207262	0.002756	0.225645	-0.04863	0.103479	0.103929	0.086522	-0.01625	1	0.070476	0.070249	0.011506	0.110487	0.086978	-0.01414	0.022211	-0.04081	-0.15268	0.025497	-0.00284	0.092069	-0.03847	NA	0.095748	0.079367	-0.13661	0.01516	0.013043	0.050374	0.153474	-0.02338	0.136977
Zdhhc12	0.012879	0.114796	-0.11066	0.478377	-0.1878	0.368278	0.23756	0.048938	0.231203	0.070476	1	0.167589	0.074255	0.176038	0.338863	-0.13868	0.04207	0.071606	-0.14163	-0.11348	0.022206	0.160607	0.042662	NA	0.009353	0.016797	-0.17635	0.049204	0.059051	0.044735	0.343503	-0.26151	0.460438
Zdhhc13	0.133236	0.433459	0.477053	0.118219	0.311602	0.311365	0.430318	0.491377	0.412873	0.070249	0.167589	1	0.295788	0.404201	0.375786	0.446641	0.286516	-0.07867	0.187497	0.506415	0.314995	0.170309	0.320713	NA	0.334998	0.568527	0.219913	0.361934	0.305083	0.240434	0.32003	0.434636	0.067022
Zdhhc14	-0.1883	0.330454	0.348309	-0.00936	0.321992	0.111052	0.37337	0.512049	0.477944	0.011506	0.074255	0.295788	1	0.325985	0.193355	0.475782	0.250798	0.091619	0.270464	0.465333	0.251755	0.162141	0.4049	NA	0.050676	0.271246	0.151505	0.437562	0.29091	0.186803	0.126702	0.361366	0.054021
Zdhhc15	0.250756	0.630869	0.363402	0.253795	0.304003	0.233541	0.50871	0.63203	0.388569	0.110487	0.176038	0.404201	0.325985	1	0.203701	0.437277	0.384837	-0.05438	0.320994	0.526477	0.215132	0.068326	0.252565	NA	0.330717	0.379406	0.038115	0.321961	0.302756	0.202164	0.281712	0.306242	0.204151
Zdhhc16	0.033955	0.28929	0.327744	0.400627	0.057424	0.321887	0.367273	0.272965	0.255953	0.086978	0.338863	0.375786	0.193355	0.203701	1	0.140541	0.147026	-0.09884	-0.13877	0.148852	0.166113	0.174579	0.052604	NA	0.199948	0.373568	-0.02578	0.246138	0.169754	0.251712	0.379215	0.170807	0.378862
Zdhhc17	0.175816	0.500137	0.688774	-0.09748	0.643963	0.149512	0.53875	0.699603	0.610215	-0.01414	-0.13868	0.446641	0.475782	0.437277	0.140541	1	0.481397	0.061083	0.53437	0.789208	0.305796	0.032632	0.502023	NA	0.363802	0.55389	0.41338	0.543835	0.509411	0.319767	0.190672	0.619707	-0.14002
Zdhhc18	0.304127	0.302088	0.521848	0.1825	0.469118	0.262326	0.366755	0.515635	0.452935	0.022211	0.04207	0.286516	0.250798	0.384837	0.147026	0.481397	1	0.069163	0.184326	0.540913	0.168908	0.067581	0.276131	NA	0.4601	0.417225	0.193034	0.444839	0.335849	0.332992	0.173029	0.379708	0.039906
Zdhhc19	-0.01877	-0.0499	-0.03953	0.046159	0.014399	0.050532	0.029181	-0.01703	0.173028	-0.04081	0.071606	-0.07867	0.091619	-0.05438	-0.09884	0.061083	0.069163	1	0.173369	-0.00934	-0.06142	-0.00787	0.100857	NA	0.06175	-0.06735	-0.0217	0.199371	0.09378	0.095879	0.125598	-0.11565	0.055543
Zdhhc20	0.164482	0.275098	0.392394	-0.14827	0.419969	0.031871	0.295607	0.416831	0.401759	-0.15268	-0.14163	0.187497	0.270464	0.320994	-0.13877	0.53437	0.184326	0.173369	1	0.480457	0.188507	-0.04099	0.497438	NA	0.197151	0.203786	0.461612	0.381901	0.355168	0.198255	0.086028	0.417443	-0.3908
Zdhhc21	0.25299	0.578635	0.686221	-0.05057	0.662569	0.222117	0.528477	0.752736	0.586184	0.025497	-0.11348	0.506415	0.465333	0.526477	0.148852	0.789208	0.540913	-0.00934	0.480457	1	0.359947	0.006372	0.514893	NA	0.472194	0.597159	0.320639	0.54589	0.506075	0.287348	0.272286	0.658165	-0.05539
Zdhhc22	0.079463	0.301758	0.301094	0.024343	0.200313	0.13525	0.208556	0.341616	0.19091	-0.00284	0.022206	0.314995	0.251755	0.215132	0.166113	0.305796	0.168908	-0.06142	0.188507	0.359947	1	0.094075	0.185996	NA	0.117367	0.371389	0.114142	0.23416	0.075193	0.072835	0.122069	0.324355	0.090944
Zdhhc23	-0.09828	-0.00284	0.108603	0.055369	0.020224	0.135305	0.085183	0.15969	0.037663	0.092069	0.160607	0.170309	0.162141	0.068326	0.174579	0.032632	0.067581	-0.00787	-0.04099	0.006372	0.094075	1	0.098473	NA	-0.12759	0.083267	-0.01781	0.070844	-0.11811	0.207665	-0.07378	0.096704	0.0302
Zdhhc24	0.154413	0.301138	0.417533	-0.01044	0.438934	0.187163	0.33388	0.426004	0.533431	-0.03847	0.042662	0.320713	0.4049	0.252565	0.052604	0.502023	0.276131	0.100857	0.497438	0.514893	0.185996	0.098473	1	NA	0.308947	0.286044	0.4969	0.399789	0.463884	0.201133	0.341345	0.401616	-0.13028
Zdhhc25	NA	NA	NA	NA	NA	NA	NA	NA	NA	NA	NA	NA	NA	NA	NA	NA	NA	NA	NA	NA	NA	NA	NA	1	NA	NA	NA	NA	NA	NA	NA	NA	NA
Lypla1	0.417269	0.369741	0.408181	0.156771	0.504517	0.282537	0.345962	0.317313	0.382368	0.095748	0.009353	0.334998	0.050676	0.330717	0.199948	0.363802	0.4601	0.06175	0.197151	0.472194	0.117367	-0.12759	0.308947	NA	1	0.435018	0.257756	0.200225	0.353406	0.061885	0.440057	0.264477	0.064505
Lypla2	0.214078	0.442936	0.587176	0.078539	0.460492	0.333235	0.408128	0.518677	0.407389	0.079367	0.016797	0.568527	0.271246	0.379406	0.373568	0.55389	0.417225	-0.06735	0.203786	0.597159	0.371389	0.083267	0.286044	NA	0.435018	1	0.221954	0.424422	0.27967	0.172666	0.297195	0.505259	0.111006
Ppt1	0.155861	0.219831	0.404983	-0.24497	0.500452	0.051948	0.174295	0.222656	0.314415	-0.13661	-0.17635	0.219913	0.151505	0.038115	-0.02578	0.41338	0.193034	-0.0217	0.461612	0.320639	0.114142	-0.01781	0.4969	NA	0.257756	0.221954	1	0.256958	0.304196	0.071057	0.219967	0.361908	-0.31797
Abhd17a	0.100793	0.320022	0.61414	0.156191	0.338751	0.277365	0.500448	0.611211	0.702569	0.01516	0.049204	0.361934	0.437562	0.321961	0.246138	0.543835	0.444839	0.199371	0.381901	0.54589	0.23416	0.070844	0.399789	NA	0.200225	0.424422	0.256958	1	0.421197	0.428578	0.257131	0.490926	0.028297
Abhd17b	0.125537	0.453987	0.439925	0.164821	0.235506	0.149588	0.4411	0.364149	0.57788	0.013043	0.059051	0.305083	0.29091	0.302756	0.169754	0.509411	0.335849	0.09378	0.355168	0.506075	0.075193	-0.11811	0.463884	NA	0.353406	0.27967	0.304196	0.421197	1	0.263556	0.482446	0.264777	-0.04667
Abhd17c	0.060111	0.149971	0.367249	0.147635	0.176864	0.141839	0.383698	0.373132	0.321552	0.050374	0.044735	0.240434	0.186803	0.202164	0.251712	0.319767	0.332992	0.095879	0.198255	0.287348	0.072835	0.207665	0.201133	NA	0.061885	0.172666	0.071057	0.428578	0.263556	1	0.137465	0.207461	-0.06502
Golga7	0.27561	0.436347	0.275001	0.414205	0.21227	0.394479	0.377545	0.246669	0.416015	0.153474	0.343503	0.32003	0.126702	0.281712	0.379215	0.190672	0.173029	0.125598	0.086028	0.272286	0.122069	-0.07378	0.341345	NA	0.440057	0.297195	0.219967	0.257131	0.482446	0.137465	1	0.023379	0.37628
Golga7b	0.15161	0.333107	0.635321	-0.11086	0.478335	0.039186	0.356276	0.623858	0.401432	-0.02338	-0.26151	0.434636	0.361366	0.306242	0.170807	0.619707	0.379708	-0.11565	0.417443	0.658165	0.324355	0.096704	0.401616	NA	0.264477	0.505259	0.361908	0.490926	0.264777	0.207461	0.023379	1	-0.19389
Selk	-0.02565	0.169552	-0.01174	0.41217	-0.10509	0.285194	0.050113	0.013582	0.064009	0.136977	0.460438	0.067022	0.054021	0.204151	0.378862	-0.14002	0.039906	0.055543	-0.3908	-0.05539	0.090944	0.0302	-0.13028	NA	0.064505	0.111006	-0.31797	0.028297	-0.04667	-0.06502	0.37628	-0.19389	1
