# Supplementary material for: Exploring the expression patterns of palmitoylating and de-palmitoylating enzymes in the mouse brain using the curated RNA-seq database BrainPalmSeq
Source: eLife. 2022 Jul 12;11:e75804. doi: 10.7554/eLife.75804 (PMC9365392; doi:10.7554/eLife.75804)
Supplement: Figure 1—source data 5. [file elife-75804-fig1-data5.xlsx]

## Sheet: Sheet1
Figure 1E: Spearman correlations of S-palmitoylation associated genes vs all other genes across 265 metacells in 'MouseBrain' dataset (R > 0.7)
Brain Expressed postnatal (MGI) UniProt Reviewed			Correlated R > 0.7 with any Zdhhc, de-palmitoylating enzyme or accessory protein						Correlated R > 0.7 with any Zdhhc						Correlated R > 0.8 with any Zdhhc
Gene name			gene1	gene2	R	pval	FDR		914 genes		52 genes		346 genes		154 genes		13 genes		77 genes
Asip			Ttbk2	Zdhhc21	0.87282	6.52E-84	2.34E-81		Correlated with any Zdhhc > 0.7; UniProt Reviewed		Correlated with any Zdhhc> 0.7: Not UniProt reviewed		Correlated with any Zdhhc> 0.7: Uniprot reviewed, SwissPalm annotated		Correlated with any Zdhhc > 0.8; UniProt Reviewed		Correlated with any Zdhhc > 0.8: Not UniProt reviewed		Correlated with any Zdhhc > 0.8: Uniprot reviewed, SwissPalm annotated
A1bg			Kif1a	Zdhhc17	0.86980	1.16E-82	4.14E-80		Aak1		0610010F05Rik		Ywhab		Actr2		5730455P16Rik		Ywhag
A1cf			Ywhag	Zdhhc17	0.86970	1.27E-82	4.55E-80		Aars		1810013L24Rik		Ywhag		Adam22		AI314180		Ywhaz
A2m			Rtn3	Zdhhc17	0.86667	2.11E-81	7.56E-79		Aatk		2310035C23Rik		Ywhaz		Agtpbp1		BC030336		Ap1g1
A3galt2			Dync1li2	Zdhhc21	0.86441	1.66E-80	5.92E-78		Abca2		2610002M06Rik		Ppp2r1a		Ap1g1		Gm15800		Ap2b1
A4galt			Uhmk1	Zdhhc21	0.86375	2.98E-80	1.07E-77		Abca3		4932438A13Rik		Ppp2r2d		Ap2b1		Usp31		Arl8a
A4gnt			Dnm1l	Zdhhc21	0.86246	9.40E-80	3.36E-77		Abca5		5730409E04Rik		Aak1		Arfgef1		Adap1		Arl8b
Aaas			Pafah1b1	Zdhhc21	0.86234	1.05E-79	3.75E-77		Abcc5		5730455P16Rik		Got1		Arfgef2		Akap11		Actr2
Aacs			Kif1a	Zdhhc21	0.86113	3.06E-79	1.09E-76		Abce1		9330159F19Rik		Got2		Arhgap35		Akap6		Atp9a
Aadac			Gls	Zdhhc21	0.86082	4.01E-79	1.43E-76		Abhd17a		9330182L06Rik		Abhd17a		Arl8a		Herc1		Dnajc6
Aadat			Wdr7	Zdhhc17	0.86072	4.38E-79	1.56E-76		Acbd5		AI314180		Abca3		Arl8b		Kbtbd2		Arfgef1
Aagab			Etnk1	Zdhhc17	0.85881	2.29E-78	8.15E-76		Ackr1		BC005537		Abce1		Atp9a		Kidins220		Arfgef2
Aak1			Ube2o	Zdhhc17	0.85839	3.30E-78	1.18E-75		Acp2		BC030336		Acsl4		Atxn7l3		Rap1gds1		Bmpr2
Aamdc			Agtpbp1	Zdhhc21	0.85684	1.24E-77	4.40E-75		Acsl4		Dennd4a		Actr1b		B4galt5		Usp32		Brsk2
Aanat			Serinc1	Zdhhc17	0.85585	2.85E-77	1.01E-74		Actr1a		Dip2c		Actr1a		Bcl2l2				Camsap2
Aar2			Zyg11b	Zdhhc17	0.85585	2.86E-77	1.02E-74		Actr1b		E130309D14Rik		Add1		Bmpr2				Cand1
Aard			Ywhag	Zdhhc21	0.85567	3.33E-77	1.18E-74		Actr2		Fam217b		Afg3l2		Brsk2				Cadps
Aars			Opa1	Zdhhc17	0.85485	6.62E-77	2.35E-74		Acvr1b		Fam8a1		Agap3		Cab39				Tmem30a
Aars2			Cadps	Zdhhc21	0.85484	6.69E-77	2.37E-74		Adam22		Gm15800		Ago2		Cadps				Cds2
Aarsd1			Npepps	Zdhhc21	0.85434	1.01E-76	3.59E-74		Adar		Map2k7.1		Ina		Camsap2				Cluh
Aasdh			Arfgef1	Zdhhc21	0.85431	1.04E-76	3.67E-74		Add1		Mroh1		Alg2		Cand1				Slc25a12
Aasdhppt			5730455P16Rik	Zdhhc21	0.85426	1.08E-76	3.83E-74		Add2		Nxpe3		Ank2		Cds2				Csde1
Aass			Cab39	Zdhhc21	0.85412	1.22E-76	4.31E-74		Adgrl1		Raph1		Ankrd17		Cep170b				Cyfip2
Aatf			Wsb2	Zdhhc8	0.85408	1.25E-76	4.44E-74		Adss		Tbc1d22b		Snap91		Cluh				Dync1li2
Aatk			Larp1	Zdhhc21	0.85360	1.88E-76	6.64E-74		Aes		Tecpr2		Ap1b1		Csde1				Dcaf5
Abat			Etnk1	Zdhhc21	0.85342	2.18E-76	7.70E-74		Aff3		Tmem178b		Ap1g1		Cyfip2				Dmxl2
Abca1			Kif5a	Zdhhc21	0.85046	2.46E-75	8.69E-73		Aff4		Tvp23a		Ap2a1		D17wsu92e				Dnajc5
Abca2			Ube4b	Zdhhc21	0.84794	1.85E-74	6.53E-72		Afg3l2		Usp31		Ap2b1		Dcaf5				Dnm1l
Abca3			Slc25a46	Zdhhc17	0.84595	8.88E-74	3.13E-71		Aftph		Usp35		Ap3b2		Dlst				Dync1h1
Abca4			Myo5a	Zdhhc21	0.84538	1.38E-73	4.89E-71		Agap3		Zfyve9		Ap3d1		Dmxl2				Fbxw11
Abca5			Mapk8ip3	Zdhhc21	0.84432	3.17E-73	1.12E-70		Agfg1		3110043O21Rik		Arf3		Dnajb14				G3bp2
Abca6			Cab39	Zdhhc17	0.84428	3.27E-73	1.15E-70		Ago2		Adap1		Arl8a		Dnajc5				Gak
Abca7			Mapk8ip3	Zdhhc17	0.84408	3.80E-73	1.34E-70		Ago3		Akap11		Arl8b		Dnajc6				Gnb1
Abca8a			Kif5a	Zdhhc17	0.84404	3.92E-73	1.38E-70		Agps		Akap6		Actr2		Dnm1l				Ghitm
Abca8b			AI314180	Zdhhc21	0.84388	4.45E-73	1.57E-70		Agtpbp1		Ap1ar		Atp13a2		Dvl1				Gls
Abca9			Ralgapb	Zdhhc17	0.84216	1.67E-72	5.86E-70		Akt3		Bptf		Atp2a2		Dync1h1				Gnaq
Abca17			Dnajb14	Zdhhc21	0.84188	2.06E-72	7.26E-70		Alg11		Ccdc149		Atad1		Dync1li1				Golga2
Abcb1b			Tom1l2	Zdhhc21	0.84188	2.07E-72	7.27E-70		Alg2		Ddx19b		Atcay		Dync1li2				Hcfc1
Abcb4			Ube3c	Zdhhc21	0.84177	2.24E-72	7.85E-70		Amigo1		Dnajc13		Atg9a		Eif5a2				Hspa4l
Abcb1a,Abcb4			Atxn7l3	Zdhhc17	0.84175	2.28E-72	7.99E-70		Amph		Herc1		Atl1		Epm2aip1				Eif5a2
Abcb5			Camsap2	Zdhhc21	0.84139	2.99E-72	1.05E-69		Ank2		Herc3		Atp9a		Etnk1				Inpp4a
Abcb6			Opa1	Zdhhc21	0.84118	3.50E-72	1.23E-69		Ankrd13b		Kbtbd2		Atrn		Fam219a				Ipo7
Abcb7			Uhmk1	Zdhhc17	0.84107	3.81E-72	1.34E-69		Ankrd13c		Kidins220		Dnajc6		Fam73a				Kif1a
Abcb8			Gnb1	Zdhhc21	0.84099	4.05E-72	1.42E-69		Ankrd17		Lonrf2		Bace1		Fbxo45				Larp1
Abcb9			Ap1g1	Zdhhc17	0.84054	5.71E-72	2.00E-69		Ankrd46		Lrp3		Arfgef1		Fbxw11				Pafah1b1
Abcb10			Dnm1l	Zdhhc17	0.84026	7.05E-72	2.47E-69		Ap1b1		Mdn1		Arfgef2		Fem1b				Map4
Abcb11			Serinc1	Zdhhc21	0.83864	2.37E-71	8.29E-69		Ap1g1		Mtx3		Arfgef3		G3bp2				Mfsd6
Abcc1			Herc2	Zdhhc21	0.83858	2.47E-71	8.65E-69		Ap2a1		Rap1gds1		Bmpr2		Gak				Myo5a
Abcc2			Zyg11b	Zdhhc21	0.83833	2.97E-71	1.04E-68		Ap2b1		Slc24a2		Bpnt1		Ghitm				Whsc1
Abcc3			Rab6b	Zdhhc21	0.83818	3.32E-71	1.16E-68		Ap3b2		Slc9a6		Braf		Gls				Nudt3
Abcc5			Slc30a9	Zdhhc21	0.83817	3.36E-71	1.17E-68		Ap3d1		Trak2		Brsk1		Gnaq				Ogdh
Abcc6			Dmxl2	Zdhhc21	0.83798	3.86E-71	1.35E-68		Ap3s2		Usp32		Brsk2		Gnb1				Dlst
Abcc9			Ube2o	Zdhhc21	0.83795	3.94E-71	1.38E-68		Apba1		Vps13d		Bsn		Golga2				Opa1
Abcc10			Ppm1a	Zdhhc21	0.83720	6.90E-71	2.40E-68		Apc				C2cd2l		Gsk3b				Pi4k2a
Abcc12			Pitpna	Zdhhc21	0.83679	9.27E-71	3.23E-68		Apc2				Cd99l2		Hcfc1				Ppp3cb
Abcd1			Myo5a	Zdhhc17	0.83635	1.29E-70	4.48E-68		Aplp2				Cacna1b		Herc2				Ppm1a
Abcd2			Npepps	Zdhhc17	0.83608	1.57E-70	5.46E-68		Appbp2				Cadm3		Hspa4l				Npepps
Abcd3			Gnaq	Zdhhc21	0.83586	1.84E-70	6.39E-68		Arel1				Camsap2		Ids				Rab6b
Abcd4			Ncs1	Zdhhc17	0.83534	2.68E-70	9.32E-68		Arf3				Cand1		Inpp4a				Reep1
Abce1			Wdfy3	Zdhhc17	0.83522	2.92E-70	1.02E-67		Arfgef1				Caprin1		Ipo7				Rtn3
Abcf1			Wdfy3	Zdhhc21	0.83478	4.03E-70	1.40E-67		Arfgef2				Cadps		Irgq				Slc27a4
Abcf2			Ids	Zdhhc21	0.83472	4.20E-70	1.46E-67		Arfgef3				Tmem30a		Kif1a				Slc45a1
Abcf3			Whsc1	Zdhhc21	0.83469	4.29E-70	1.49E-67		Arhgap23				Cds2		Kif1b				Sec23a
Abcg1			Tom1l2	Zdhhc17	0.83411	6.55E-70	2.27E-67		Arhgap35				Ugcg		Kif3c				Serinc1
Abcg2			Cluh	Zdhhc17	0.83402	7.00E-70	2.43E-67		Arhgap44				Chp1		Kif5a				Napb
Abcg3			Dync1li2	Zdhhc17	0.83336	1.12E-69	3.89E-67		Arhgef18				Cs		Kpna6				Snx27
Abcg5			Usp31	Zdhhc21	0.83204	2.88E-69	9.98E-67		Arih1				Clasp1		Larp1				Stxbp1
Abhd2			Cds2	Zdhhc21	0.83179	3.46E-69	1.20E-66		Arl8a				Clasp2		Larp4b				Synj1
Abhd3			Slc25a46	Zdhhc21	0.83130	4.88E-69	1.69E-66		Arl8b				Clcn6		Lmbr1				Syt11
Abhd4			Wdr7	Zdhhc21	0.83119	5.30E-69	1.83E-66		Armc8				Clcn7		Map2k4				Tmem63b
Abhd5			Pafah1b1	Zdhhc17	0.83093	6.35E-69	2.19E-66		Arrb1				Cltc		Map3k9				Tnpo2
Abhd6			Arl8a	Zdhhc21	0.83037	9.42E-69	3.25E-66		Asb1				Clip3		Map4				Ube2o
Abhd8			Adam22	Zdhhc17	0.83011	1.14E-68	3.92E-66		Asxl1				Cluh		Mapk8ip2				Uso1
Abhd10			G3bp2	Zdhhc21	0.82988	1.33E-68	4.60E-66		Atad1				Slc25a12		Mapk8ip3				Vezt
Abhd11			Actr2	Zdhhc21	0.82933	1.96E-68	6.74E-66		Atcay				Cnst		Mapk9				Vkorc1l1
Abhd12			Napb	Zdhhc17	0.82929	2.01E-68	6.94E-66		Atf2				Cntn1		Mfn2				Wdfy3
Abhd13			Larp4b	Zdhhc21	0.82925	2.08E-68	7.15E-66		Atf6				Copg2		Mfsd6				Wdr7
Abhd14a			Rufy3	Zdhhc21	0.82914	2.23E-68	7.69E-66		Atg13				Csde1		Myo5a				Ttc7b
Abhd14b			Akap11	Zdhhc17	0.82913	2.25E-68	7.73E-66		Atg16l1				Ctnna2		Napb
Abhd15			Agtpbp1	Zdhhc17	0.82912	2.26E-68	7.78E-66		Atg2b				Cyfip2		Nckap1
Abhd16a			5730455P16Rik	Zdhhc17	0.82904	2.40E-68	8.23E-66		Atg4b				Dync1li2		Ncs1
Abhd16b			Ube3c	Zdhhc17	0.82855	3.38E-68	1.16E-65		Atg9a				Dcaf5		Nfe2l1
Abhd17a			Slc30a9	Zdhhc17	0.82831	4.00E-68	1.38E-65		Atl1				Ddx17		Npepps
Abhd17b			Usp32	Zdhhc21	0.82739	7.55E-68	2.59E-65		Atmin				Ddx6		Nudt3
Abhd17c			Vezt	Zdhhc21	0.82737	7.65E-68	2.63E-65		Atp13a2				Dgke		Ogdh
Abhd18			Fam73a	Zdhhc21	0.82725	8.29E-68	2.84E-65		Atp2a2				Diras1		Opa1
Abi1			Irgq	Zdhhc21	0.82697	1.01E-67	3.47E-65		Atp6ap1				Disp2		Pafah1b1
Abi2			Ubr3	Zdhhc21	0.82614	1.79E-67	6.13E-65		Atp6v0a1				Dnajc16		Pgm2l1
Abi3			Fam73a	Zdhhc17	0.82601	1.95E-67	6.68E-65		Atp6v1a				Dmxl2		Pi4k2a
Abitram			Pja2	Zdhhc17	0.82558	2.62E-67	8.98E-65		Atp6v1b2				Dnaja2		Pitpna
Abl1			Lmbr1	Zdhhc17	0.82546	2.85E-67	9.74E-65		Atp6v1h				Dnaja3		Pja2
Abl2			Ppm1a	Zdhhc17	0.82522	3.35E-67	1.14E-64		Atp9a				Dnajc5		Ppm1a
Ablim1			Pgm2l1	Zdhhc21	0.82518	3.43E-67	1.17E-64		Atrn				Dnm1l		Ppm1b
Ablim2			Herc1	Zdhhc17	0.82514	3.53E-67	1.21E-64		Atrnl1				Dpysl2		Ppp2r2c
Ablim3			Mfn2	Zdhhc17	0.82514	3.55E-67	1.21E-64		Atxn7l3				Adar		Ppp3cb
Abo			Hcfc1	Zdhhc8	0.82500	3.90E-67	1.33E-64		Au040320				Dusp3		Prrc2b
Abr			Arhgap35	Zdhhc21	0.82495	4.03E-67	1.37E-64		Azi2				Dync1h1		Rab3gap2
Abra			Kif1b	Zdhhc21	0.82482	4.39E-67	1.50E-64		B3gat3				Dnm3		Rab6b
Abracl			Stxbp1	Zdhhc17	0.82454	5.31E-67	1.81E-64		B4galt5				Dst		Rabep1
Abraxas1			Dmxl2	Zdhhc17	0.82393	8.06E-67	2.74E-64		B4galt6				Epb41l1		Ralgapa1
Abraxas2			Ralgapb	Zdhhc21	0.82337	1.17E-66	3.98E-64		Bace1				Epb41l3		Ralgapb
Abt1			Ralgapa1	Zdhhc17	0.82337	1.17E-66	3.99E-64		Bap1				Eef1a2		Rb1cc1
Abtb1			Rtn3	Zdhhc21	0.82329	1.24E-66	4.21E-64		Bcl2l2				Efr3b		Reep1
Abtb2			Ttbk2	Zdhhc17	0.82297	1.53E-66	5.20E-64		Becn1				Elp3		Rnf14
Acaa1a			Gm15800	Zdhhc17	0.82270	1.84E-66	6.25E-64		Bend6				Emc1		Rtn3
Acaa1b			Ppp3cb	Zdhhc21	0.82236	2.31E-66	7.85E-64		Bicd1				Eno2		Rufy3
Acaa2			Vkorc1l1	Zdhhc21	0.82222	2.54E-66	8.62E-64		Bmpr2				Ergic1		Sec23a
Acaca			Nfe2l1	Zdhhc21	0.82181	3.34E-66	1.13E-63		Bod1				Exoc2		Selt
Acacb			Ube4a	Zdhhc21	0.82157	3.93E-66	1.33E-63		Bpnt1				Fam126b		Serinc1
Acad8			Cep170b	Zdhhc21	0.82138	4.46E-66	1.51E-63		Braf				Far1		Slc25a12
Acad9			Gak	Zdhhc21	0.82118	5.06E-66	1.71E-63		Brap				Fbxw11		Slc25a46
Acad10			Rnf14	Zdhhc17	0.82088	6.21E-66	2.10E-63		Brms1l				Fbxo41		Slc27a4
Acad11			Tspyl1	Zdhhc17	0.82057	7.58E-66	2.57E-63		Brox				Flot2		Slc30a9
Acadl			Syt11	Zdhhc17	0.82051	7.91E-66	2.67E-63		Brsk1				G3bp2		Slc45a1
Acadm			Herc2	Zdhhc17	0.81983	1.24E-65	4.18E-63		Brsk2				Gak		Smim13
Acads			Ppp2r2c	Zdhhc17	0.81978	1.28E-65	4.33E-63		Bsn				Gatsl2		Snx27
Acadsb			Stau2	Zdhhc17	0.81976	1.29E-65	4.37E-63		Btrc				Gnb1		Sppl3
Acadvl			Kif3c	Zdhhc17	0.81972	1.33E-65	4.49E-63		C2cd2l				Gdi1		Stau2
Acan			Wdr37	Zdhhc21	0.81971	1.35E-65	4.54E-63		Cab39				Ggt7		Stxbp1
Acap1			Ralgapa1	Zdhhc21	0.81962	1.42E-65	4.79E-63		Cacna1b				Slc25a22		Synj1
Acap2			Sppl3	Zdhhc17	0.81954	1.50E-65	5.05E-63		Cacul1				Ghitm		Syt11
Acat1			Ogdh	Zdhhc21	0.81876	2.50E-65	8.40E-63		Cadm3				Gls		Taok1
Acat2			Tgoln1	Zdhhc21	0.81860	2.78E-65	9.37E-63		Cadps				Gmfb		Tbc1d9
Acbd3			Ppp3cb	Zdhhc17	0.81856	2.85E-65	9.59E-63		Camsap1				Gnao1		Tcf25
Acbd5			Map3k9	Zdhhc21	0.81855	2.88E-65	9.68E-63		Camsap2				Gnaq		Tgoln1
Acbd6			Gls	Zdhhc8	0.81848	3.01E-65	1.01E-62		Camta1				Gnaz		Tmem30a
Acbd7			Fbxo45	Zdhhc21	0.81829	3.40E-65	1.14E-62		Cand1				Gnl1		Tmem63b
Accs			Mapk8ip2	Zdhhc21	0.81802	4.05E-65	1.36E-62		Caprin1				Gnptab		Tmod2
Accsl			Cyfip2	Zdhhc17	0.81776	4.82E-65	1.62E-62		Casc3				Golga2		Tnpo2
Acd			Rab6b	Zdhhc17	0.81751	5.66E-65	1.90E-62		Caskin1				Gpat4		Tom1l2
Ace			Atxn7l3	Zdhhc21	0.81749	5.72E-65	1.92E-62		Cbfa2t2				Gpd1l		Tspyl1
Ace2			Hspa4l	Zdhhc17	0.81725	6.67E-65	2.24E-62		Cbl				Pigk		Ttbk2
Ace3			Ogdh	Zdhhc17	0.81712	7.28E-65	2.44E-62		Cbx6				Grk6		Ttc7b
Acer2			Uso1	Zdhhc21	0.81704	7.67E-65	2.57E-62		Ccdc92				Hspa9		Ube2j1
Acer3			Ubr3	Zdhhc17	0.81649	1.09E-64	3.66E-62		Cd99l2				Glg1		Ube2o
Ache			Ap2b1	Zdhhc21	0.81592	1.59E-64	5.30E-62		Cdc27				H3f3a, H3f3b		Ube2q1
Acin1			Whsc1	Zdhhc17	0.81590	1.60E-64	5.36E-62		Cdc34				Hacd3		Ube2z
Ackr1			Reep1	Zdhhc21	0.81554	2.02E-64	6.74E-62		Cdc42bpa				Hcfc1		Ube3c
Ackr2			Larp1	Zdhhc17	0.81552	2.04E-64	6.81E-62		Cdc42bpb				Htt		Ube4a
Ackr3			Selt	Zdhhc21	0.81549	2.08E-64	6.95E-62		Cdip1				Hnrnpul2		Ube4b
Ackr4			Sec23a	Zdhhc21	0.81546	2.12E-64	7.08E-62		Cdk14				Hspa12a		Ubr3
Acly			Dync1h1	Zdhhc17	0.81538	2.23E-64	7.45E-62		Cdk16				Hspa4l		Uhmk1
Acmsd			Akap11	Zdhhc21	0.81525	2.43E-64	8.10E-62		Cdk5r2				Hsdl1		Uso1
Acnat1			Csde1	Zdhhc21	0.81517	2.55E-64	8.50E-62		Cdkl2				Hspa4		Usp22
Acnat2			Sppl3	Zdhhc21	0.81516	2.57E-64	8.54E-62		Cds2				Huwe1		Vezt
Aco1			Mapk9	Zdhhc17	0.81506	2.74E-64	9.11E-62		Cend1				Hk1		Vkorc1l1
Aco2			Bcl2l2	Zdhhc21	0.81503	2.80E-64	9.31E-62		Cep120				Eif4b		Wdfy3
Acod1			D17Wsu92e	Zdhhc21	0.81503	2.80E-64	9.31E-62		Cep170b				Eif4g1		Wdr37
Acot1			Kpna6	Zdhhc21	0.81480	3.24E-64	1.08E-61		Chp1				Eif4g3		Wdr7
Acot2			Selt	Zdhhc17	0.81458	3.73E-64	1.24E-61		Chrnb2				Eif5a2		Whsc1
Acot3			Dnajc5	Zdhhc17	0.81437	4.25E-64	1.41E-61		Clasp1				Kpnb1		Wsb2
Acot4			Dvl1	Zdhhc17	0.81424	4.62E-64	1.53E-61		Clasp2				Inpp4a		Ywhag
Acot5			Kpna6	Zdhhc17	0.81410	5.06E-64	1.68E-61		Clcn3				Ipo5		Ywhaz
Acot6			Mapk9	Zdhhc21	0.81391	5.70E-64	1.89E-61		Clcn6				Ipo7		Zmat3
Acot7			Synj1	Zdhhc17	0.81384	5.96E-64	1.98E-61		Clcn7				Ipo9, Ranbp9		Zyg11b
Acot8			Tmod2	Zdhhc21	0.81376	6.27E-64	2.08E-61		Clip3				Jak1
Acot9			Ap2b1	Zdhhc17	0.81364	6.78E-64	2.24E-61		Clstn1				AU040320
Acot10			Stxbp1	Zdhhc21	0.81331	8.36E-64	2.77E-61		Cltc				Pfkp
Acot11			Kif3c	Zdhhc21	0.81316	9.18E-64	3.03E-61		Cluh				Prkar1a
Acot12			Epm2aip1	Zdhhc21	0.81294	1.06E-63	3.50E-61		Cmip				Prkacb
Acot13			AI314180	Zdhhc17	0.81288	1.10E-63	3.63E-61		Cnst				Csnk1d
Acox2			Tnpo2	Zdhhc21	0.81283	1.14E-63	3.75E-61		Cntn1				Csnk1g2
Acox3			Pi4k2a	Zdhhc21	0.81281	1.14E-63	3.78E-61		Cntn2				Csnk1g3
Acoxl			Kidins220	Zdhhc21	0.81281	1.15E-63	3.78E-61		Coa5				Kcnab2
Acp1			Ncs1	Zdhhc21	0.81275	1.19E-63	3.93E-61		Cobl				Kcmf1
Acp2			Hcfc1	Zdhhc21	0.81264	1.27E-63	4.20E-61		Cog6				Kif1a
Acp4			D17Wsu92e	Zdhhc17	0.81253	1.37E-63	4.50E-61		Col4a3bp				Klc1
Acp5			Ube4b	Zdhhc17	0.81251	1.38E-63	4.55E-61		Copg2				Klc2
Acp6			Atp9a	Zdhhc17	0.81217	1.71E-63	5.64E-61		Cops2				Lancl2
Acp7			Mfsd6	Zdhhc17	0.81201	1.89E-63	6.23E-61		Coro2a				Larp1
Acpp			Rb1cc1	Zdhhc21	0.81185	2.09E-63	6.88E-61		Cpeb1				Larp4
Acr			Golga2	Zdhhc17	0.81163	2.41E-63	7.92E-61		Cpeb2				Lpgat1
Acrbp			Ube2z	Zdhhc21	0.81157	2.51E-63	8.23E-61		Cpeb4				Limk1
Acsbg1			Gsk3b	Zdhhc21	0.81155	2.53E-63	8.30E-61		Cplx1				Pafah1b1
Acsbg2			Fbxo45	Zdhhc17	0.81140	2.78E-63	9.12E-61		Cpsf7				Aatk
Acsf2			Ttc7b	Zdhhc17	0.81104	3.49E-63	1.14E-60		Cramp1l				Lrrc59
Acsf3			Mfsd6	Zdhhc21	0.81076	4.13E-63	1.36E-60		Crbn				Lrp12
Acsl1			B4galt5	Zdhhc21	0.81068	4.36E-63	1.43E-60		Creld1				Map3k12
Acsl3			Slc45a1	Zdhhc17	0.81052	4.82E-63	1.58E-60		Crls1				Map1a
Acsl4			Eif5a2	Zdhhc21	0.81025	5.70E-63	1.86E-60		Cry2				Map1b
Acsl5			Pja2	Zdhhc21	0.81018	5.96E-63	1.95E-60		Cs				Map4
Acsl6			Fbxw11	Zdhhc21	0.81004	6.49E-63	2.12E-60		Csde1				Map6
Acsm1			Adap1	Zdhhc17	0.80992	7.00E-63	2.29E-60		Csnk1d				Mast1
Acsm3			BC030336	Zdhhc21	0.80975	7.75E-63	2.53E-60		Csnk1g2				Mfsd6
Acsm4			Pafah1b1	Zdhhc8	0.80943	9.48E-63	3.09E-60		Csnk1g3				Micu3
Acsm5			Ipo7	Zdhhc21	0.80927	1.04E-62	3.40E-60		Csrnp3				Rhot1
Acss1			Brsk2	Zdhhc17	0.80924	1.07E-62	3.48E-60		Csrp2bp				Rhot2
Acss2			Dcaf5	Zdhhc21	0.80875	1.44E-62	4.69E-60		Ctif				Mapk1
Acss3			Zmat3	Zdhhc17	0.80860	1.58E-62	5.16E-60		Ctnna2				Cdc42bpb
Acta1			Nudt3	Zdhhc21	0.80859	1.59E-62	5.17E-60		Cul2				Cbfa2t2
Acta2			Ppm1b	Zdhhc21	0.80847	1.71E-62	5.58E-60		Cul3				Mtor
Actb			Tmem30a	Zdhhc21	0.80808	2.18E-62	7.08E-60		Cyfip2				Mtpn
Actbl2			Cds2	Zdhhc17	0.80804	2.23E-62	7.26E-60		Cyp4x1				Mycbp2
Actc1			Nfe2l1	Zdhhc17	0.80801	2.27E-62	7.36E-60		D15ertd621e				Myo5a
Actg1			Slc25a12	Zdhhc17	0.80772	2.72E-62	8.83E-60		D17wsu92e				Naa25
Actg2			Tmem63b	Zdhhc17	0.80768	2.79E-62	9.06E-60		D5ertd579e				Nat8l
Actl6a			Ube2q1	Zdhhc21	0.80757	2.98E-62	9.66E-60		Dcaf5				Nceh1
Actl6b			Nckap1	Zdhhc17	0.80743	3.25E-62	1.05E-59		Dck				Ndel1
Actl7a			Mapk8ip2	Zdhhc17	0.80725	3.62E-62	1.18E-59		Dcp2				Nfasc
Actl9			Gnb1	Zdhhc17	0.80713	3.89E-62	1.26E-59		Dctn5				Nefl
Actl10			Dlst	Zdhhc17	0.80710	3.95E-62	1.28E-59		Dcun1d1				Nus1
Actn1			Agtpbp1	Zdhhc8	0.80704	4.11E-62	1.33E-59		Dcun1d2				Nmnat2
Actn2			Taok1	Zdhhc21	0.80698	4.26E-62	1.38E-59		Dcun1d4				Whsc1
Actn3			Cadps	Zdhhc17	0.80692	4.42E-62	1.43E-59		Ddhd2				Nsf
Actn4			Snx27	Zdhhc17	0.80674	4.94E-62	1.60E-59		Ddi2				Nt5dc3
Actr1a			Ube2j1	Zdhhc21	0.80649	5.74E-62	1.86E-59		Ddx17				Nudt3
Actr1b			Fbxo45	Zdhhc8	0.80640	6.06E-62	1.96E-59		Ddx6				Ocrl
Actr2			Tcf25	Zdhhc17	0.80630	6.43E-62	2.08E-59		Def8				Ogdh
Actr3			Ids	Zdhhc17	0.80609	7.33E-62	2.37E-59		Depdc5				Dlst
Actr3b			Inpp4a	Zdhhc21	0.80604	7.55E-62	2.44E-59		Dffa				Dlat
Actr5			Slc27a4	Zdhhc17	0.80603	7.58E-62	2.45E-59		Dgcr2				Pdha1
Actr6			Stau2	Zdhhc21	0.80602	7.65E-62	2.47E-59		Dgke				Opa1
Actr8			Rap1gds1	Zdhhc17	0.80600	7.76E-62	2.50E-59		Dgkq				Osbp
Actr10			Akap6	Zdhhc21	0.80576	8.96E-62	2.89E-59		Dhdds				Otub1
Actrt2			Nudt3	Zdhhc17	0.80575	9.00E-62	2.90E-59		Dhx36				Oxr1
Actrt3			Usp22	Zdhhc17	0.80568	9.41E-62	3.03E-59		Dhx57				Pi4k2a
Acvr1b			Ap1g1	Zdhhc21	0.80566	9.51E-62	3.06E-59		Diras1				Pafah1b2
Acvr1c			Usp32	Zdhhc17	0.80551	1.04E-61	3.34E-59		Disp2				Pcnxl2
Acvr2a			Prrc2b	Zdhhc21	0.80549	1.05E-61	3.38E-59		Dlat				Pgrmc2
Acvr2b			Ywhaz	Zdhhc8	0.80527	1.20E-61	3.86E-59		Dlst				Phf8
Acvrl1			Pi4k2a	Zdhhc17	0.80511	1.32E-61	4.24E-59		Dmtn				Pom121
Acy1			Gls	Zdhhc17	0.80508	1.35E-61	4.34E-59		Dmxl2				Ppp2ca
Acy3			Fam219a	Zdhhc21	0.80488	1.52E-61	4.89E-59		Dnaja2				Ppp2cb
Acyp1			Map2k4	Zdhhc17	0.80482	1.58E-61	5.06E-59		Dnaja3				Ppp3cb
Acyp2			Tspyl1	Zdhhc21	0.80438	2.05E-61	6.58E-59		Dnajb14				Acp2
Ada			Mfn2	Zdhhc21	0.80434	2.10E-61	6.73E-59		Dnajc16				Ppm1a
Adad2			Smim13	Zdhhc17	0.80422	2.27E-61	7.25E-59		Dnajc18				Ppme1
Adal			Tbc1d9	Zdhhc21	0.80396	2.65E-61	8.46E-59		Dnajc21				Praf2
Adam1a			Golga2	Zdhhc21	0.80363	3.21E-61	1.03E-58		Dnajc27				Npepps
Adam1b			Fem1b	Zdhhc17	0.80355	3.39E-61	1.08E-58		Dnajc5				Ptbp2
Adam3			Rabep1	Zdhhc17	0.80351	3.46E-61	1.10E-58		Dnajc6				Ptdss1
Adam5			Map4	Zdhhc21	0.80345	3.58E-61	1.14E-58		Dnm1l				Adss
Adam7			Rnf14	Zdhhc21	0.80337	3.77E-61	1.20E-58		Dnm3				Pura
Adam8			Ppp2r2c	Zdhhc21	0.80280	5.30E-61	1.69E-58		Dock3				Purb
Adam9			Bmpr2	Zdhhc21	0.80264	5.82E-61	1.86E-58		Dopey2				Rab15
Adam10			Cand1	Zdhhc21	0.80262	5.90E-61	1.88E-58		Dpp9				Rab21
Adam11			Pgm2l1	Zdhhc17	0.80212	7.90E-61	2.52E-58		Dpysl2				Rab35
Adam12			Cyfip2	Zdhhc21	0.80205	8.27E-61	2.63E-58		Dst				Rab5b
Adam15			Arl8b	Zdhhc17	0.80177	9.77E-61	3.11E-58		Dusp3				Rab6a
Adam17			Rab3gap2	Zdhhc21	0.80172	1.00E-60	3.19E-58		Dvl1				Rab6b
Adam18			Rufy3	Zdhhc17	0.80146	1.17E-60	3.72E-58		Dync1h1				Rabl6
Adam19			Arfgef1	Zdhhc17	0.80121	1.35E-60	4.30E-58		Dync1li1				Rangap1
Adam21			Zmat3	Zdhhc21	0.80101	1.53E-60	4.85E-58		Dync1li2				Rap2a
Adam22			Dnajc6	Zdhhc17	0.80100	1.54E-60	4.87E-58		Dynlt3				Hras
Adam23			Ghitm	Zdhhc17	0.80045	2.12E-60	6.72E-58		Dyrk1a				Rab3gap1
Adam32			Arfgef2	Zdhhc21	0.80037	2.23E-60	7.07E-58		Dzank1				Ranbp10
Adam33			Kbtbd2	Zdhhc21	0.80025	2.39E-60	7.56E-58		Eef1a2				Rdh13
Adamts1			Dync1li1	Zdhhc21	0.80011	2.59E-60	8.20E-58		Efr3b				Reep1
Adamts2			Camsap1	Zdhhc17	0.79975	3.21E-60	1.02E-57		Ehd3				Reep5
Adamts4			Ube2m	Zdhhc21	0.79932	4.12E-60	1.30E-57		Eid2				Rab11fip5
Adamts5			Cdk5r2	Zdhhc17	0.79931	4.14E-60	1.31E-57		Eif2ak1				Arhgap44
Adamts7			Gnb1	Zdhhc8	0.79928	4.21E-60	1.33E-57		Eif4b				Rnf11
Adamts8			Cbx6	Zdhhc17	0.79919	4.44E-60	1.40E-57		Eif4enif1				Rtn3
Adamts10			Tmem178b	Zdhhc17	0.79903	4.86E-60	1.54E-57		Eif4g1				Slc25a36
Adamts12			Larp4b	Zdhhc17	0.79898	5.02E-60	1.59E-57		Eif4g3				Slc25a51
Adamts13			Akt3	Zdhhc21	0.79890	5.26E-60	1.66E-57		Eif5a2				Slc27a4
Adamts15			Pitpna	Zdhhc17	0.79868	5.96E-60	1.88E-57		Elavl2				Slc36a4
Adamts16			Dnajc6	Zdhhc21	0.79835	7.22E-60	2.28E-57		Elavl4				Slc45a1
Adamts18			Zfyve27	Zdhhc21	0.79833	7.31E-60	2.30E-57		Elovl4				Slc6a15
Adamts19			Tbc1d10b	Zdhhc17	0.79787	9.57E-60	3.01E-57		Elp3				Slc7a14
Adamts20			Atg4b	Zdhhc17	0.79783	9.79E-60	3.08E-57		Emc1				Sacm1l
Adamtsl1			Actr2	Zdhhc17	0.79782	9.84E-60	3.10E-57		Eml2				Sacs
Adamtsl4			Ubqln1	Zdhhc21	0.79775	1.02E-59	3.21E-57		Eno2				Sec23a
Adap2			Snx19	Zdhhc17	0.79765	1.08E-59	3.41E-57		Enpp5				Scamp1
Adar			Bcl2l2	Zdhhc17	0.79764	1.09E-59	3.42E-57		Epb41l1				Scamp5
Adarb1			Atp6v0a1	Zdhhc17	0.79757	1.13E-59	3.56E-57		Epb41l3				Slc25a25
Adarb2			Rab6a	Zdhhc21	0.79747	1.20E-59	3.78E-57		Epg5				Scn8a
Adat1			Fem1b	Zdhhc21	0.79743	1.23E-59	3.88E-57		Epm2a				Sept6
Adat2			Pdha1	Zdhhc21	0.79734	1.30E-59	4.06E-57		Epm2aip1				Serinc1
Adck1			0610010F05Rik	Zdhhc21	0.79732	1.32E-59	4.13E-57		Ept1				Sfxn3
Adck2			4932438A13Rik	Zdhhc17	0.79714	1.45E-59	4.56E-57		Erc2				Smarcc1
Adck5			Tollip	Zdhhc21	0.79703	1.55E-59	4.85E-57		Ergic1				Napb
Adcy1			Ube2h	Zdhhc21	0.79651	2.09E-59	6.56E-57		Etnk1				Napg
Adcy2			Camsap2	Zdhhc17	0.79645	2.17E-59	6.78E-57		Exoc2				Snph
Adcy3			Usp31	Zdhhc17	0.79644	2.18E-59	6.82E-57		Exoc3				Snx27
Adcy4			Uso1	Zdhhc17	0.79637	2.26E-59	7.08E-57		Exoc6b				Socs5
Adcy5			Usp45	Zdhhc21	0.79624	2.44E-59	7.61E-57		Ezh1				Spred2
Adcy6			Vps13d	Zdhhc17	0.79621	2.48E-59	7.74E-57		Fam117b				Spryd7
Adcy7			Myo9a	Zdhhc8	0.79610	2.65E-59	8.28E-57		Fam120b				Sptbn1
Adcy8			Taok1	Zdhhc17	0.79587	3.02E-59	9.43E-57		Fam126b				Sptan1
Adcy9			Cdc42bpa	Zdhhc17	0.79581	3.13E-59	9.77E-57		Fam134a				Stx1b
Adcy10			Ube4a	Zdhhc17	0.79576	3.22E-59	1.00E-56		Fam134b				Stxbp1
Adcyap1			Dnajb14	Zdhhc17	0.79561	3.50E-59	1.09E-56		Fam155a				Stxbp5
Adcyap1r1			Map2k4	Zdhhc21	0.79551	3.72E-59	1.16E-56		Fam168a				Sucla2
Add1			Arih1	Zdhhc21	0.79536	4.04E-59	1.26E-56		Fam168b				Sv2a
Add2			Irgq	Zdhhc17	0.79495	5.10E-59	1.59E-56		Fam169a				Svop
Add3			Tlk2	Zdhhc17	0.79483	5.48E-59	1.70E-56		Fam189b				Aars
Adgb			Spag9	Zdhhc21	0.79476	5.67E-59	1.76E-56		Fam20b				Gars
Adgra1			Ube2m	Zdhhc17	0.79474	5.73E-59	1.78E-56		Fam210a				Syn1
Adgra2			Ipo7	Zdhhc17	0.79471	5.84E-59	1.81E-56		Fam219a				Nars
Adgra3			Ankrd17	Zdhhc17	0.79465	6.06E-59	1.88E-56		Fam234b				Synj1
Adgrb1			Cand1	Zdhhc17	0.79457	6.35E-59	1.97E-56		Fam53c				Syt11
Adgrb2			Cep170b	Zdhhc17	0.79453	6.47E-59	2.01E-56		Fam73a				Wars
Adgrb3			Ubqln1	Zdhhc17	0.79434	7.23E-59	2.24E-56		Fam73b				Tmem151a
Adgrd1			Arl8b	Zdhhc21	0.79426	7.56E-59	2.34E-56		Far1				Tmem151b
Adgre1			Slc36a1	Zdhhc21	0.79422	7.71E-59	2.39E-56		Fbxl17				Tardbp
Adgre4			Slc38a9	Zdhhc21	0.79419	7.84E-59	2.43E-56		Fbxl2				Tanc2
Adgre5			Nceh1	Zdhhc17	0.79415	8.02E-59	2.48E-56		Fbxo21				Tuba4a
Adgrf2			Tollip	Zdhhc17	0.79397	8.91E-59	2.76E-56		Fbxo31				Tesk1
Adgrf3			Fam168a	Zdhhc17	0.79380	9.82E-59	3.04E-56		Fbxo33				Tfrc
Adgrf4			March6	Zdhhc21	0.79361	1.09E-58	3.37E-56		Fbxo41				Tmem135
Adgrf5			Reep2	Zdhhc17	0.79353	1.14E-58	3.53E-56		Fbxo42				Tmem50b
Adgrg1			Csnk1g3	Zdhhc21	0.79350	1.16E-58	3.58E-56		Fbxo45				Tmem63b
Adgrg2			Atp6v1a	Zdhhc17	0.79338	1.24E-58	3.84E-56		Fbxw11				Tmx3
Adgrg3			Scamp5	Zdhhc17	0.79325	1.34E-58	4.13E-56		Fbxw7				Tmx4
Adgrg5			Gopc	Zdhhc21	0.79321	1.37E-58	4.22E-56		Fem1b				Tnpo2
Adgrg6			Mtor	Zdhhc21	0.79295	1.58E-58	4.88E-56		Fitm2				Tollip
Adgrl1			Syn1	Zdhhc17	0.79281	1.71E-58	5.29E-56		Fkbp1b				Tomm70a
Adgrl2			Dst	Zdhhc21	0.79278	1.74E-58	5.37E-56		Fktn				Trp53bp1
Adgrl3			Scamp1	Zdhhc17	0.79264	1.89E-58	5.82E-56		Flot2				Trappc10
Adgrl4			Myo9a	Zdhhc21	0.79254	1.99E-58	6.13E-56		Fmr1				Trappc11
Adgrv1			Akt3	Zdhhc8	0.79240	2.16E-58	6.63E-56		Foxj3				Trappc9
Adh1			Wdr37	Zdhhc17	0.79239	2.17E-58	6.68E-56		Foxk2				Trim2
Adh4			Gm15800	Zdhhc21	0.79237	2.19E-58	6.73E-56		Fto				Trip12
Adh5			Map6	Zdhhc8	0.79234	2.23E-58	6.84E-56		Fxr2				Ttpal
Adh7			Map1a	Zdhhc17	0.79230	2.29E-58	7.02E-56		G3bp2				Cdc34
Adhfe1			Kif1b	Zdhhc17	0.79228	2.31E-58	7.09E-56		Gabarapl1				Uba1
Adi1			Hk1	Zdhhc17	0.79215	2.49E-58	7.63E-56		Gak				Uba6
Adig			Rb1cc1	Zdhhc17	0.79188	2.89E-58	8.87E-56		Gan				Ube2m
Adipoq			Ugcg	Zdhhc21	0.79170	3.20E-58	9.80E-56		Gapvd1				Ube2o
Adipor1			Herc1	Zdhhc21	0.79150	3.58E-58	1.10E-55		Gars				Usp14
Adipor2			9330159F19Rik	Zdhhc21	0.79149	3.59E-58	1.10E-55		Gatsl2				Usp5
Adk			Ywhab	Zdhhc17	0.79136	3.86E-58	1.18E-55		Gdap1				Ubr4
Adm			Ip6k1	Zdhhc21	0.79123	4.16E-58	1.27E-55		Gdi1				Uggt1
Adm2			Nyap1	Zdhhc21	0.79117	4.30E-58	1.32E-55		Gga3				Unc13a
Adnp			Tmem50b	Zdhhc17	0.79101	4.68E-58	1.43E-55		Ggnbp2				Uso1
Adnp2			Dlst	Zdhhc21	0.79097	4.79E-58	1.46E-55		Ggt7				Atp6v1a
Ado			Cend1	Zdhhc17	0.79097	4.80E-58	1.47E-55		Ghitm				Atp6v1b2
Adora1			Ppp2ca	Zdhhc21	0.79089	5.00E-58	1.53E-55		Glg1				Atp6v1h
Adora2a			Rabep1	Zdhhc21	0.79087	5.08E-58	1.55E-55		Glrb				Vdac1
Adora2b			Snph	Zdhhc17	0.79082	5.22E-58	1.59E-55		Gls				Vezt
Adora3			Usp7	Zdhhc21	0.79074	5.45E-58	1.66E-55		Gltscr1l				Hdlbp
Adpgk			Napb	Zdhhc21	0.79071	5.55E-58	1.69E-55		Glyr1				Vkorc1l1
Adprh			Map6	Zdhhc21	0.79053	6.11E-58	1.86E-55		Gmcl1				Vps26b
Adprhl1			Rangap1	Zdhhc17	0.79046	6.37E-58	1.94E-55		Gmfb				Atp6v0a1
Adprhl2			Nefh	Zdhhc17	0.79034	6.82E-58	2.07E-55		Gnao1				Wdfy3
Adprm			Megf8	Zdhhc17	0.79022	7.30E-58	2.22E-55		Gnaq				Wdr47
Adra1a			Epm2aip1	Zdhhc17	0.79012	7.68E-58	2.33E-55		Gnaz				Wdr7
Adra1b			Slc25a12	Zdhhc21	0.79003	8.10E-58	2.46E-55		Gnb1				Wrnip1
Adra1a,Adra1d			Ubr4	Zdhhc21	0.79002	8.13E-58	2.47E-55		Gnl1				Xpot
Adra2a			Slc38a9	Zdhhc17	0.78996	8.41E-58	2.55E-55		Gnl3l				Fam20b
Adra2b			Dync1h1	Zdhhc21	0.78991	8.63E-58	2.62E-55		Gnptab				Ykt6
Adra2c			Katnal1	Zdhhc21	0.78990	8.68E-58	2.63E-55		Golga2				Zdhhc17
Adrb1			Herc2	Zdhhc8	0.78990	8.70E-58	2.64E-55		Golga3				Zdhhc21
Adrb2			Nploc4	Zdhhc21	0.78990	8.70E-58	2.64E-55		Gopc				Zdhhc8
Adrb3			Gak	Zdhhc17	0.78984	8.97E-58	2.72E-55		Got1				Zzef1
Adrm1			Pafah1b2	Zdhhc17	0.78980	9.19E-58	2.78E-55		Got2				Ttc7b
Adsl			Atxn7l3	Zdhhc3	0.78964	1.00E-57	3.03E-55		Gpat4
Adss			Msl1	Zdhhc21	0.78960	1.03E-57	3.10E-55		Gpd1l
Adssl1			Trim44	Zdhhc21	0.78956	1.05E-57	3.17E-55		Gpr137
Adtrp			Usp5	Zdhhc17	0.78954	1.06E-57	3.21E-55		Gramd1b
Aebp1			Rap1gds1	Zdhhc21	0.78944	1.12E-57	3.38E-55		Grk6
Aebp2			Ept1	Zdhhc21	0.78939	1.15E-57	3.49E-55		Grsf1
Aen			Mtmr6	Zdhhc21	0.78938	1.16E-57	3.49E-55		Gsk3a
Afap1			Usp22	Zdhhc21	0.78921	1.27E-57	3.84E-55		Gsk3b
Afap1l1			Zdhhc17	Zdhhc21	0.78921	1.27E-57	3.84E-55		H3f3a
Afap1l2			Zdhhc21	Zdhhc17	0.78921	1.27E-57	3.84E-55		H3f3b
Afdn			Reep1	Zdhhc17	0.78914	1.33E-57	4.00E-55		Hacd3
Aff1			Clasp1	Zdhhc21	0.78908	1.37E-57	4.12E-55		Hace1
Aff2			Atp6v1b2	Zdhhc17	0.78862	1.76E-57	5.30E-55		Hcfc1
Aff3			Rab3gap2	Zdhhc17	0.78859	1.79E-57	5.39E-55		Hdlbp
Aff4			Wsb2	Zdhhc21	0.78833	2.07E-57	6.22E-55		Hectd3
Afg1l			Usp45	Zdhhc17	0.78819	2.23E-57	6.72E-55		Hecw1
Afg3l1			Nckap1	Zdhhc8	0.78788	2.64E-57	7.93E-55		Herc2
Afg3l2			Cs	Zdhhc21	0.78765	3.00E-57	9.02E-55		Hgs
Afm			Aak1	Zdhhc17	0.78758	3.11E-57	9.35E-55		Hid1
Afmid			Gdap1	Zdhhc21	0.78746	3.32E-57	9.96E-55		Hira
Afp			Lhfpl4	Zdhhc17	0.78726	3.70E-57	1.11E-54		Hk1
Aftph			Akap11	Zdhhc8	0.78713	3.98E-57	1.19E-54		Hmbox1
Aga			Zfyve27	Zdhhc17	0.78713	3.99E-57	1.19E-54		Hnrnpul2
Agap1			Tlk2	Zdhhc21	0.78702	4.22E-57	1.27E-54		Hras
Agap2			Lonrf2	Zdhhc17	0.78702	4.23E-57	1.27E-54		Hs6st1
Agap3			Atp9a	Zdhhc21	0.78692	4.46E-57	1.33E-54		Hsdl1
Agbl1			Cs	Zdhhc17	0.78690	4.52E-57	1.35E-54		Hspa12a
Agbl2			Atl1	Zdhhc21	0.78684	4.68E-57	1.40E-54		Hspa4
Agbl3			Sacs	Zdhhc17	0.78669	5.05E-57	1.51E-54		Hspa4l
Agbl4			Slc9a6	Zdhhc21	0.78654	5.50E-57	1.64E-54		Hspa9
Agbl5			Synj1	Zdhhc21	0.78653	5.52E-57	1.65E-54		Htt
Ager			Lonrf2	Zdhhc21	0.78649	5.64E-57	1.68E-54		Huwe1
Agfg1			Cdc42bpa	Zdhhc21	0.78647	5.69E-57	1.70E-54		Ice1
Agfg2			Cpeb1	Zdhhc21	0.78644	5.80E-57	1.73E-54		Icmt
Aggf1			Ywhaz	Zdhhc21	0.78637	6.03E-57	1.80E-54		Ids
Agk			Ubr4	Zdhhc17	0.78633	6.17E-57	1.84E-54		Ikbkg
Agmat			0610010F05Rik	Zdhhc17	0.78628	6.32E-57	1.88E-54		Impact
Agmo			Lpgat1	Zdhhc21	0.78599	7.40E-57	2.20E-54		Ina
Ago1			Spag9	Zdhhc17	0.78597	7.47E-57	2.22E-54		Inpp4a
Ago2			Ttc7b	Zdhhc21	0.78595	7.55E-57	2.25E-54		Inpp5f
Ago3			Lmbr1	Zdhhc21	0.78592	7.68E-57	2.28E-54		Ip6k1
Ago4			Fam168b	Zdhhc21	0.78589	7.81E-57	2.32E-54		Ipo5
Agpat1			B3gat3	Zdhhc21	0.78574	8.47E-57	2.52E-54		Ipo7
Agpat2			Hk1	Zdhhc21	0.78572	8.58E-57	2.55E-54		Ipo9
Agpat3			Ppp2ca	Zdhhc17	0.78558	9.22E-57	2.74E-54		Iqsec2
Agpat4			Eif5a2	Zdhhc17	0.78546	9.86E-57	2.93E-54		Ireb2
Agpat5			Ube2z	Zdhhc17	0.78539	1.03E-56	3.04E-54		Irgq
Agps			Kif3b	Zdhhc21	0.78528	1.09E-56	3.22E-54		Itfg1
Agr2			Pptc7	Zdhhc17	0.78503	1.24E-56	3.69E-54		Jak1
Agr3			Herc3	Zdhhc17	0.78432	1.82E-56	5.39E-54		Jakmip3
Agrn			Lpgat1	Zdhhc17	0.78431	1.83E-56	5.43E-54		Jph3
Agrp			Map1b	Zdhhc21	0.78418	1.96E-56	5.81E-54		Kansl3
Agt			Fam168b	Zdhhc17	0.78400	2.17E-56	6.42E-54		Kat7
Agtpbp1			Rad23b	Zdhhc8	0.78390	2.28E-56	6.75E-54		Katnal1
Agtr1a			Clcn6	Zdhhc21	0.78383	2.37E-56	6.99E-54		Kcmf1
Agtr1b			Slc27a4	Zdhhc21	0.78382	2.39E-56	7.05E-54		Kcnab2
Agtr2			Ttll7	Zdhhc17	0.78372	2.51E-56	7.41E-54		Kcnq2
Agtrap			Atg13	Zdhhc21	0.78329	3.16E-56	9.33E-54		Kctd2
Agxt			Ocrl	Zdhhc21	0.78324	3.25E-56	9.59E-54		Kctd3
Ahctf1			Prkci	Zdhhc21	0.78321	3.30E-56	9.73E-54		Kctd9
Ahcy			Cab39	Zdhhc3	0.78299	3.72E-56	1.10E-53		Kdsr
Ahcyl1			Prrc2b	Zdhhc17	0.78285	4.01E-56	1.18E-53		Kif1a
Ahcyl2			BC005537	Zdhhc21	0.78275	4.23E-56	1.24E-53		Kif1b
Ahdc1			Got2	Zdhhc17	0.78275	4.23E-56	1.24E-53		Kif21a
Ahi1			Akap6	Zdhhc17	0.78259	4.61E-56	1.36E-53		Kif2a
Ahr			Myo9a	Zdhhc17	0.78258	4.61E-56	1.36E-53		Kif3b
Ahrr			Ranbp6	Zdhhc21	0.78257	4.66E-56	1.37E-53		Kif3c
Ahsa1			Ubr3	Zdhhc8	0.78249	4.85E-56	1.42E-53		Kif5a
Ahsa2			Tmem30a	Zdhhc17	0.78240	5.08E-56	1.49E-53		Kif5c
Ahsg			Adam22	Zdhhc21	0.78230	5.38E-56	1.58E-53		Kifap3
Aicda			Camsap2	Zdhhc8	0.78229	5.40E-56	1.58E-53		Klc1
Aida			Rnf214	Zdhhc21	0.78218	5.71E-56	1.67E-53		Klc2
Aif1			Ric3	Zdhhc17	0.78207	6.07E-56	1.78E-53		Klhdc10
Aif1l			Kctd2	Zdhhc21	0.78183	6.89E-56	2.02E-53		Klhl12
Aifm1			Nt5dc3	Zdhhc21	0.78180	7.00E-56	2.05E-53		Kpna1
Aifm2			Map4k3	Zdhhc21	0.78179	7.02E-56	2.05E-53		Kpna6
Aifm3			Napg	Zdhhc17	0.78176	7.16E-56	2.10E-53		Kpnb1
Aig1			Kpna1	Zdhhc21	0.78174	7.22E-56	2.11E-53		Krt222
Aim2			Rhot1	Zdhhc8	0.78172	7.29E-56	2.13E-53		Ksr2
Aimp1			Ap3d1	Zdhhc21	0.78157	7.88E-56	2.30E-53		L1cam
Aimp2			Brsk2	Zdhhc21	0.78155	7.98E-56	2.33E-53		Lancl2
Aip			Eif4g1	Zdhhc21	0.78146	8.36E-56	2.44E-53		Larp1
Aipl1			Ap3b2	Zdhhc21	0.78140	8.65E-56	2.53E-53		Larp4
Aire			Abce1	Zdhhc8	0.78140	8.66E-56	2.53E-53		Larp4b
Ajap1			Panx2	Zdhhc17	0.78132	9.00E-56	2.63E-53		Lhfpl4
Ajm1			Slc12a6	Zdhhc17	0.78095	1.10E-55	3.20E-53		Limk1
Ajuba			Micu3	Zdhhc21	0.78094	1.10E-55	3.21E-53		Limk2
Ak1			Tomm70a	Zdhhc21	0.78075	1.22E-55	3.54E-53		Lmbr1
Ak2			Ept1	Zdhhc17	0.78036	1.49E-55	4.35E-53		Lpgat1
Ak3			Slc41a2	Zdhhc21	0.78034	1.51E-55	4.40E-53		Lrfn1
Ak4			Slc36a4	Zdhhc17	0.78032	1.53E-55	4.45E-53		Lrig2
Ak5			Ankrd17	Zdhhc21	0.78029	1.55E-55	4.52E-53		Lrp11
Ak6			Zfp451	Zdhhc21	0.78021	1.62E-55	4.69E-53		Lrp12
Ak7			Spin1	Zdhhc21	0.78015	1.68E-55	4.87E-53		Lrrc16b
Ak8			Nudt3	Zdhhc8	0.78012	1.70E-55	4.93E-53		Lrrc49
Akain1			Mgea5	Zdhhc17	0.78011	1.71E-55	4.96E-53		Lrrc59
Akap1			Slc12a6	Zdhhc21	0.77998	1.82E-55	5.29E-53		Lrsam1
Akap3			Nckap1	Zdhhc21	0.77997	1.84E-55	5.33E-53		Ltn1
Akap4			Bace1	Zdhhc17	0.77980	2.01E-55	5.82E-53		Luc7l
Akap5			Inpp4a	Zdhhc17	0.77947	2.39E-55	6.93E-53		Lynx1
Akap7			Atp6v1a	Zdhhc21	0.77929	2.62E-55	7.58E-53		Lztr1
Akap7			Gsk3a	Zdhhc21	0.77919	2.76E-55	8.00E-53		Madd
Akap8			Maneal	Zdhhc17	0.77917	2.79E-55	8.08E-53		Maea
Akap8l			Ppp3cb	Zdhhc8	0.77910	2.89E-55	8.37E-53		Mafg
Akap9			Ube3c	Zdhhc8	0.77909	2.92E-55	8.43E-53		Magee1
Akap10			Klc2	Zdhhc3	0.77905	2.97E-55	8.58E-53		Maneal
Akap12			Arf3	Zdhhc17	0.77899	3.07E-55	8.88E-53		Map1a
Akap13			Dnajc27	Zdhhc17	0.77897	3.10E-55	8.95E-53		Map1b
Akap17b			Vcpip1	Zdhhc21	0.77895	3.13E-55	9.04E-53		Map2k4
Akip1			Gnaq	Zdhhc17	0.77894	3.14E-55	9.07E-53		Map3k10
Akirin1			Syn1	Golga7b	0.77850	3.96E-55	1.14E-52		Map3k12
Akirin2			Vps41	Zdhhc17	0.77838	4.21E-55	1.22E-52		Map3k9
Akna			Dip2c	Zdhhc21	0.77836	4.26E-55	1.23E-52		Map4
Akp3			Glrb	Zdhhc17	0.77833	4.34E-55	1.25E-52		Map4k3
Akr1a1			Actr1b	Zdhhc21	0.77824	4.53E-55	1.30E-52		Map6
Akr1b3			Lancl2	Zdhhc21	0.77824	4.54E-55	1.31E-52		Mapk1
Akr1b7			Zzef1	Zdhhc17	0.77818	4.67E-55	1.35E-52		Mapk10
Akr1b8			Mapk8	Zdhhc17	0.77805	5.02E-55	1.44E-52		Mapk8
Akr1c6			Zbtb7a	Zdhhc17	0.77797	5.22E-55	1.50E-52		Mapk8ip2
Akr1c13			Nus1	Zdhhc21	0.77795	5.27E-55	1.51E-52		Mapk8ip3
Akr1c18			Arl8a	Zdhhc17	0.77783	5.61E-55	1.61E-52		Mapk9
Akr1c21			Kpna1	Zdhhc17	0.77782	5.64E-55	1.62E-52		Mapre2
Akr1d1			Tex2	Zdhhc21	0.77767	6.10E-55	1.75E-52		Mapre3
Akr1e1			Mtor	Zdhhc17	0.77757	6.44E-55	1.85E-52		Mapt
Akr7a5			Fam20b	Zdhhc21	0.77756	6.47E-55	1.86E-52		6-mar
Akt1			Tmem127	Zdhhc17	0.77750	6.66E-55	1.91E-52		Marf1
Akt1s1			Stxbp1	Golga7b	0.77749	6.71E-55	1.92E-52		Mark1
Akt2			Fitm2	Zdhhc21	0.77747	6.77E-55	1.94E-52		Mark2
Akt3			Dgkq	Zdhhc17	0.77730	7.39E-55	2.12E-52		Mark4
Aktip			Zbtb4	Zdhhc21	0.77722	7.70E-55	2.20E-52		Mast1
Alad			Dnajc5	Zdhhc21	0.77708	8.30E-55	2.37E-52		Mast2
Alas1			Dnajc18	Zdhhc17	0.77691	9.02E-55	2.58E-52		Mef2d
Alas2			Atp13a2	Zdhhc17	0.77691	9.03E-55	2.58E-52		Megf8
Alb			Pdpk1	Zdhhc21	0.77680	9.56E-55	2.73E-52		Mfn2
Alcam			Rnf157	Zdhhc17	0.77664	1.04E-54	2.97E-52		Mfsd6
Aldh1a1			Kcnab2	Zdhhc17	0.77661	1.06E-54	3.02E-52		Mgea5
Aldh1a3			Mtmr3	Zdhhc21	0.77651	1.11E-54	3.17E-52		Mia3
Aldh1a7			Icmt	Zdhhc17	0.77632	1.23E-54	3.50E-52		Mib1
Aldh1a2,Aldh1a7			Arfgef2	Zdhhc17	0.77604	1.41E-54	4.03E-52		Micu3
Aldh1b1			Lrp3	Zdhhc17	0.77595	1.48E-54	4.22E-52		Mief1
Aldh1l1			Arih1	Zdhhc17	0.77593	1.50E-54	4.27E-52		Mob4
Aldh1l2			Itfg1	Zdhhc21	0.77590	1.52E-54	4.32E-52		Mprip
Aldh2			Dlat	Zdhhc17	0.77584	1.57E-54	4.46E-52		Msl1
Aldh3a1			Napg	Zdhhc21	0.77578	1.62E-54	4.60E-52		Mtmr3
Aldh3a2			Abce1	Zdhhc21	0.77567	1.71E-54	4.88E-52		Mtmr4
Aldh3b1			Kif3b	Zdhhc17	0.77557	1.80E-54	5.11E-52		Mtmr6
Aldh3b2			Dgkq	Zdhhc21	0.77556	1.81E-54	5.15E-52		Mtmr7
Aldh3b3			Dync1li1	Zdhhc17	0.77552	1.85E-54	5.24E-52		Mtor
Aldh4a1			G3bp2	Zdhhc17	0.77544	1.93E-54	5.47E-52		Mtpn
Aldh5a1			Vcpip1	Zdhhc17	0.77542	1.95E-54	5.52E-52		Mturn
Aldh6a1			Cul3	Zdhhc21	0.77534	2.03E-54	5.75E-52		Mycbp2
Aldh7a1			Epm2a	Zdhhc21	0.77522	2.16E-54	6.12E-52		Myo5a
Aldh8a1			Ppm1a	Zdhhc8	0.77512	2.27E-54	6.44E-52		Myo9a
Aldh9a1			Abcc5	Zdhhc17	0.77496	2.47E-54	7.00E-52		Naa25
Aldh16a1			BC030336	Zdhhc17	0.77456	3.02E-54	8.55E-52		Nalcn
Aldh18a1			Katnal1	Zdhhc17	0.77446	3.18E-54	9.01E-52		Napb
Aldob			Lrp11	Zdhhc21	0.77433	3.40E-54	9.61E-52		Napg
Aldoc			Grsf1	Zdhhc21	0.77426	3.52E-54	9.95E-52		Nars
Alg1			Wipi2	Zdhhc17	0.77423	3.58E-54	1.01E-51		Nat8l
Alg2			Ipo5	Zdhhc21	0.77418	3.67E-54	1.04E-51		Nav1
Alg3			Hectd3	Zdhhc17	0.77417	3.69E-54	1.04E-51		Nceh1
Alg5			Ppp2r2d	Zdhhc21	0.77398	4.05E-54	1.14E-51		Nckap1
Alg6			Eml2	Zdhhc17	0.77383	4.39E-54	1.24E-51		Ncoa7
Alg8			Pura	Zdhhc21	0.77378	4.51E-54	1.27E-51		Ncs1
Alg9			Ago2	Zdhhc21	0.77367	4.75E-54	1.34E-51		Ndel1
Alg10b			Actr2	Zdhhc8	0.77351	5.15E-54	1.45E-51		Ndrg3
Alg11			Arhgap44	Zdhhc21	0.77348	5.23E-54	1.47E-51		Ndrg4
Alg12			Kctd2	Zdhhc17	0.77344	5.35E-54	1.51E-51		Necap1
Alg13			Marf1	Zdhhc17	0.77339	5.47E-54	1.54E-51		Nefh
Alg14			Stxbp1	Zdhhc3	0.77334	5.63E-54	1.58E-51		Nefl
Alk			Mapk10	Zdhhc21	0.77325	5.88E-54	1.65E-51		Neurl1a
Alkal1			Syt11	Zdhhc21	0.77325	5.88E-54	1.65E-51		Neurl4
Alkal2			Tbc1d13	Zdhhc17	0.77325	5.89E-54	1.65E-51		Nfasc
Alkbh1			Gmfb	Zdhhc21	0.77316	6.16E-54	1.73E-51		Nfe2l1
Alkbh2			Armc8	Zdhhc21	0.77308	6.40E-54	1.80E-51		Nicn1
Alkbh3			Snph	Zdhhc21	0.77302	6.60E-54	1.85E-51		Nipal3
Alkbh4			Usp31	Zdhhc8	0.77299	6.71E-54	1.88E-51		Nisch
Alkbh5			Trim2	Zdhhc17	0.77284	7.25E-54	2.03E-51		Nkrf
Alkbh6			2310035C23Rik	Zdhhc21	0.77284	7.26E-54	2.03E-51		Nmnat2
Alkbh7			Cdk5r2	Zdhhc21	0.77275	7.59E-54	2.13E-51		Npepps
Alkbh8			Ank2	Zdhhc8	0.77267	7.88E-54	2.21E-51		Nploc4
Allc			Hectd3	Zdhhc21	0.77240	9.04E-54	2.53E-51		Nsf
Alms1			9330159F19Rik	Zdhhc17	0.77228	9.63E-54	2.69E-51		Nt5dc3
Alox5			Disp2	Zdhhc17	0.77201	1.10E-53	3.09E-51		Nub1
Alox5ap			Lrsam1	Zdhhc21	0.77198	1.12E-53	3.13E-51		Nudcd3
Alox8			Aak1	Zdhhc21	0.77197	1.12E-53	3.14E-51		Nudt3
Alox12			Megf8	Zdhhc21	0.77196	1.13E-53	3.15E-51		Nus1
Alox12b			Msl1	Zdhhc17	0.77180	1.23E-53	3.43E-51		Nyap1
Alox12e			Atg2b	Zdhhc17	0.77175	1.25E-53	3.50E-51		Ocrl
Alox15			Rhot1	Zdhhc17	0.77173	1.27E-53	3.55E-51		Ogdh
Aloxe3			Ppp2r2c	Zdhhc8	0.77168	1.30E-53	3.63E-51		Ogfod1
Alpk1			3110043O21Rik	Zdhhc21	0.77162	1.34E-53	3.73E-51		Opa1
Alpk2			Armc8	Zdhhc17	0.77157	1.37E-53	3.82E-51		Osbp
Alpk3			Psme3	Zdhhc21	0.77157	1.38E-53	3.84E-51		Ostm1
Alpl			Slc45a1	Zdhhc21	0.77154	1.39E-53	3.88E-51		Otub1
Als2			Usp20	Zdhhc21	0.77154	1.40E-53	3.89E-51		Oxr1
Als2cl			Camta1	Zdhhc21	0.77144	1.47E-53	4.09E-51		Pacsin1
Alx1			Kpnb1	Zdhhc21	0.77140	1.50E-53	4.17E-51		Pafah1b1
Alx3			Tmem30a	Zdhhc8	0.77133	1.55E-53	4.31E-51		Pafah1b2
Alx4			Wdr7	Zdhhc8	0.77131	1.57E-53	4.36E-51		Pak1
Alyref			Sult4a1	Zdhhc21	0.77129	1.58E-53	4.39E-51		Panx2
Alyref2			Dvl1	Zdhhc21	0.77127	1.60E-53	4.44E-51		Pbx2
Amacr			Cadm3	Zdhhc17	0.77119	1.67E-53	4.63E-51		Pclo
Ambp			Pura	Zdhhc17	0.77119	1.67E-53	4.63E-51		Pcnxl2
Ambra1			Cacna1b	Zdhhc21	0.77116	1.68E-53	4.67E-51		Pcyox1
Amd1			Hspa4	Zdhhc21	0.77115	1.70E-53	4.71E-51		Pdha1
Amd2			Gpr137	Zdhhc17	0.77093	1.90E-53	5.26E-51		Pdp1
Amdhd1			Qrich1	Zdhhc8	0.77082	2.01E-53	5.56E-51		Pdpk1
Amdhd2			Ghitm	Zdhhc21	0.77080	2.03E-53	5.61E-51		Pdzd8
Amelx			Pptc7	Zdhhc21	0.77064	2.19E-53	6.05E-51		Pfkp
Amer1			Ywhab	Zdhhc21	0.77061	2.23E-53	6.16E-51		Pgm2l1
Amer2			Golga3	Zdhhc21	0.77051	2.34E-53	6.48E-51		Pgrmc2
Amer3			Dcaf5	Zdhhc17	0.77050	2.35E-53	6.49E-51		Phf8
Amfr			Abca3	Zdhhc17	0.77040	2.47E-53	6.83E-51		Phlpp2
Amh			Ankrd13c	Zdhhc21	0.77026	2.64E-53	7.30E-51		Pi4k2a
Amhr2			Irgq	Zdhhc8	0.77016	2.78E-53	7.67E-51		Pi4ka
Amigo1			Ppp2cb	Zdhhc21	0.77015	2.80E-53	7.73E-51		Pigk
Amigo2			Actr1b	Zdhhc17	0.77007	2.91E-53	8.03E-51		Pik3ca
Amigo3			Lhfpl4	Zdhhc21	0.77000	3.02E-53	8.32E-51		Pikfyve
Ammecr1			Klc1	Zdhhc21	0.76989	3.19E-53	8.79E-51		Pip4k2b
Ammecr1l			Mark4	Zdhhc21	0.76986	3.23E-53	8.90E-51		Pip5k1c
Amn			Foxk2	Zdhhc21	0.76972	3.47E-53	9.55E-51		Pitpna
Amot			Mafg	Zdhhc17	0.76967	3.56E-53	9.81E-51		Pja2
Amotl1			Mapk10	Zdhhc17	0.76965	3.60E-53	9.89E-51		Plekha6
Amotl2			Tmem63b	Zdhhc21	0.76962	3.65E-53	1.01E-50		Plekhb2
Ampd1			Hspa4	Zdhhc17	0.76961	3.66E-53	1.01E-50		Plekhm2
Ampd2			Eno2	Zdhhc17	0.76961	3.67E-53	1.01E-50		Plekhm3
Ampd3			Arf3	Zdhhc8	0.76959	3.70E-53	1.02E-50		Pnma2
Amph			Rhot2	Zdhhc17	0.76943	4.01E-53	1.10E-50		Pom121
Amt			B4galt5	Zdhhc17	0.76941	4.06E-53	1.11E-50		Pphln1
Amy1			Pclo	Zdhhc17	0.76929	4.29E-53	1.18E-50		Ppm1a
Amz1			Cdk16	Zdhhc21	0.76926	4.35E-53	1.19E-50		Ppm1b
Amz2			Ankrd46	Zdhhc17	0.76921	4.47E-53	1.23E-50		Ppm1l
Anapc1			Pitpna	Zdhhc3	0.76918	4.54E-53	1.24E-50		Ppme1
Anapc2			Sult4a1	Zdhhc17	0.76912	4.69E-53	1.28E-50		Ppp1r12c
Anapc4			Ncoa7	Zdhhc21	0.76908	4.77E-53	1.31E-50		Ppp1r9b
Anapc5			Prkar2a	Zdhhc21	0.76905	4.83E-53	1.32E-50		Ppp2ca
Anapc7			Clcn6	Zdhhc17	0.76893	5.15E-53	1.41E-50		Ppp2cb
Anapc10			Ipo5	Zdhhc8	0.76891	5.19E-53	1.42E-50		Ppp2r1a
Anapc11			Ank2	Zdhhc21	0.76869	5.80E-53	1.59E-50		Ppp2r2c
Anapc13			Depdc5	Zdhhc17	0.76852	6.29E-53	1.72E-50		Ppp2r2d
Anapc15			Arhgap44	Zdhhc17	0.76852	6.29E-53	1.72E-50		Ppp2r5b
Anapc16			Msl1	Zdhhc8	0.76844	6.55E-53	1.79E-50		Ppp2r5c
Ang			Nefh	Zdhhc21	0.76843	6.57E-53	1.79E-50		Ppp3cb
Ang2			Slc36a1	Zdhhc17	0.76843	6.59E-53	1.80E-50		Ppp3r1
Ang4			Gltscr1l	Zdhhc17	0.76836	6.82E-53	1.86E-50		Pptc7
Angel1			Rab11fip5	Zdhhc17	0.76822	7.30E-53	1.99E-50		Praf2
Angel2			Cluh	Zdhhc21	0.76811	7.70E-53	2.10E-50		Prkaa2
Angpt1			Syn1	Zdhhc21	0.76806	7.89E-53	2.15E-50		Prkab2
Angpt2			Rangap1	Zdhhc21	0.76804	7.97E-53	2.17E-50		Prkaca
Angpt4			Mtmr3	Zdhhc8	0.76803	8.02E-53	2.18E-50		Prkacb
Angptl1			Mapk8	Zdhhc21	0.76800	8.14E-53	2.21E-50		Prkar1a
Angptl2			Agfg1	Zdhhc8	0.76798	8.21E-53	2.23E-50		Prkar1b
Angptl3			Ppp3cb	Golga7b	0.76792	8.45E-53	2.30E-50		Prkar2a
Angptl4			Uba1	Zdhhc21	0.76791	8.51E-53	2.31E-50		Prkci
Angptl6			Usp33	Zdhhc17	0.76790	8.54E-53	2.32E-50		Prpf18
Angptl7			Tmem87b	Zdhhc21	0.76784	8.82E-53	2.39E-50		Prrc2b
Angptl8			Nfe2l1	Zdhhc8	0.76783	8.86E-53	2.41E-50		Prune
Ank			Rad23b	Zdhhc21	0.76780	9.00E-53	2.44E-50		Prune2
Ank1			Dync1h1	Zdhhc8	0.76776	9.16E-53	2.48E-50		Psme3
Ank2			Mast1	Zdhhc21	0.76775	9.19E-53	2.49E-50		Ptbp2
Ank3			Cpeb4	Zdhhc17	0.76774	9.25E-53	2.51E-50		Ptdss1
Ankdd1b			Lrp11	Zdhhc17	0.76755	1.01E-52	2.75E-50		Pura
Ankef1			Rnf11	Zdhhc21	0.76745	1.07E-52	2.89E-50		Purb
Ankfy1			Fam189b	Zdhhc8	0.76737	1.11E-52	3.00E-50		Qrich1
Ankib1			Wsb2	Zdhhc17	0.76731	1.15E-52	3.10E-50		Rab11fip5
Ankk1			Rhot1	Zdhhc21	0.76730	1.15E-52	3.10E-50		Rab15
Ankle1			Hspa4l	Zdhhc21	0.76724	1.18E-52	3.19E-50		Rab21
Ankle2			Trappc10	Zdhhc21	0.76717	1.23E-52	3.31E-50		Rab35
Ankmy1			Gsk3b	Zdhhc17	0.76715	1.24E-52	3.34E-50		Rab39b
Ankmy2			Camsap1	Zdhhc21	0.76710	1.27E-52	3.42E-50		Rab3gap1
Ankra2			Dhx57	Zdhhc8	0.76710	1.27E-52	3.42E-50		Rab3gap2
Ankrd1			Aff4	Zdhhc21	0.76698	1.34E-52	3.62E-50		Rab5b
Ankrd2			Uhrf1bp1l	Zdhhc21	0.76692	1.38E-52	3.73E-50		Rab6a
Ankrd6			Gdap1	Zdhhc17	0.76683	1.45E-52	3.90E-50		Rab6b
Ankrd7			Cul3	Zdhhc17	0.76680	1.47E-52	3.96E-50		Rabep1
Ankrd9			Ap2b1	Zdhhc8	0.76679	1.48E-52	3.98E-50		Rabgap1l
Ankrd10			Rrn3	Zdhhc21	0.76671	1.54E-52	4.15E-50		Rabgef1
Ankrd11			Slc2a3	Zdhhc17	0.76664	1.59E-52	4.28E-50		Rabl6
Ankrd13a			Magee1	Zdhhc17	0.76658	1.64E-52	4.41E-50		Rad23b
Ankrd13b			Zzef1	Zdhhc21	0.76647	1.73E-52	4.66E-50		Ralgapa1
Ankrd13c			Dnajc21	Zdhhc21	0.76640	1.79E-52	4.80E-50		Ralgapb
Ankrd13d			Snx25	Zdhhc17	0.76634	1.84E-52	4.96E-50		Ranbp10
Ankrd16			Atg9a	Zdhhc17	0.76620	1.97E-52	5.29E-50		Ranbp6
Ankrd17			B4galt6	Zdhhc21	0.76612	2.05E-52	5.50E-50		Ranbp9
Ankrd22			Ppme1	Zdhhc17	0.76612	2.05E-52	5.50E-50		Rangap1
Ankrd23			Herc3	Zdhhc21	0.76603	2.14E-52	5.73E-50		Rap1gap2
Ankrd24			Actr1b	Zdhhc8	0.76593	2.25E-52	6.02E-50		Rap2a
Ankrd26			Tango2	Zdhhc17	0.76583	2.36E-52	6.33E-50		Rb1cc1
Ankrd27			Opa1	Zdhhc8	0.76567	2.55E-52	6.85E-50		Rbfox2
Ankrd28			Fxr2	Zdhhc17	0.76562	2.62E-52	7.02E-50		Rbm15b
Ankrd31			Rc3h2	Zdhhc17	0.76554	2.73E-52	7.30E-50		Rbsn
Ankrd33			Zbtb7a	Zdhhc3	0.76545	2.84E-52	7.60E-50		Rc3h1
Ankrd33b			Slc9a6	Zdhhc17	0.76541	2.89E-52	7.74E-50		Rc3h2
Ankrd34b			Dyrk1a	Zdhhc21	0.76541	2.89E-52	7.74E-50		Rcor3
Ankrd34c			Arhgap35	Zdhhc17	0.76535	2.99E-52	8.00E-50		Rdh13
Ankrd37			Zfp451	Zdhhc17	0.76533	3.01E-52	8.05E-50		Reep1
Ankrd39			Dcun1d1	Zdhhc21	0.76517	3.26E-52	8.69E-50		Reep2
Ankrd40			Cab39	Zdhhc8	0.76515	3.29E-52	8.78E-50		Reep5
Ankrd42			Trappc10	Zdhhc17	0.76514	3.30E-52	8.82E-50		Rell2
Ankrd44			Ppp2r2d	Zdhhc17	0.76513	3.33E-52	8.88E-50		Rfk
Ankrd45			Ctnna2	Zdhhc17	0.76505	3.45E-52	9.20E-50		Rfwd2
Ankrd46			Abca5	Zdhhc21	0.76494	3.64E-52	9.71E-50		Rhot1
Ankrd49			Dync1h1	Zdhhc3	0.76493	3.67E-52	9.77E-50		Rhot2
Ankrd52			Gnaq	Zdhhc8	0.76481	3.88E-52	1.03E-49		Ric3
Ankrd53			Dmxl2	Zdhhc8	0.76473	4.04E-52	1.08E-49		Rimkla
Ankrd54			Tmem50b	Zdhhc21	0.76463	4.24E-52	1.13E-49		Rltpr
Ankrd55			Ankrd46	Zdhhc21	0.76458	4.35E-52	1.16E-49		Rmnd5a
Ankrd61			Rnf19b	Zdhhc21	0.76455	4.40E-52	1.17E-49		Rnf11
Ankrd63			Sacs	Zdhhc21	0.76455	4.41E-52	1.17E-49		Rnf14
Anks1			Kcmf1	Zdhhc21	0.76449	4.53E-52	1.20E-49		Rnf145
Anks1b			Itfg1	Zdhhc17	0.76448	4.56E-52	1.21E-49		Rnf157
Anks3			Pdha1	Zdhhc17	0.76437	4.81E-52	1.28E-49		Rnf19b
Anks4b			Coa5	Zdhhc21	0.76431	4.94E-52	1.31E-49		Rnf214
Anks6			Nat8l	Zdhhc17	0.76427	5.04E-52	1.34E-49		Rnf220
Ankub1			Rusc1	Zdhhc21	0.76419	5.24E-52	1.39E-49		Rnmt
Ankzf1			Madd	Zdhhc17	0.76418	5.27E-52	1.40E-49		Rps6kb1
Anln			Atf2	Zdhhc21	0.76418	5.28E-52	1.40E-49		Rps6kc1
Ano1			B3gat3	Zdhhc17	0.76406	5.57E-52	1.48E-49		Rptor
Ano2			Brsk1	Zdhhc21	0.76399	5.77E-52	1.53E-49		Rragc
Ano3			Fam8a1	Zdhhc21	0.76393	5.95E-52	1.58E-49		Rrm2b
Ano4			Vps41	Zdhhc21	0.76392	5.98E-52	1.58E-49		Rrn3
Ano5			Cdk5r2	Golga7b	0.76392	5.99E-52	1.58E-49		Rtn2
Ano6			Coa5	Zdhhc17	0.76391	5.99E-52	1.58E-49		Rtn3
Ano7			Ube2o	Zdhhc8	0.76384	6.23E-52	1.65E-49		Rufy2
Ano8			Snap91	Zdhhc21	0.76383	6.23E-52	1.65E-49		Rufy3
Ano9			Abca2	Zdhhc17	0.76368	6.71E-52	1.77E-49		Rundc3b
Ano10			Lrrc16b	Zdhhc17	0.76352	7.26E-52	1.92E-49		Rusc1
Anp32a			Ttbk1	Zdhhc21	0.76350	7.33E-52	1.93E-49		Rusc2
Anp32b			Panx2	Zdhhc21	0.76346	7.46E-52	1.97E-49		Sacm1l
Anp32e			Ywhaz	Zdhhc17	0.76337	7.78E-52	2.05E-49		Sacs
Anpep			Mapk8ip3	Zdhhc8	0.76336	7.85E-52	2.07E-49		Samd10
Antkmt			Spryd7	Zdhhc21	0.76333	7.94E-52	2.09E-49		Sbf1
Antxr2			Rhot2	Zdhhc21	0.76326	8.23E-52	2.17E-49		Scamp1
Anxa1			Ralgapb	Zdhhc8	0.76321	8.43E-52	2.22E-49		Scamp5
Anxa2			Gga3	Zdhhc17	0.76315	8.68E-52	2.28E-49		Scn2b
Anxa3			Trim37	Zdhhc17	0.76311	8.84E-52	2.33E-49		Scn8a
Anxa4			Madd	Zdhhc21	0.76303	9.20E-52	2.42E-49		Sec23a
Anxa5			Bsn	Zdhhc21	0.76301	9.28E-52	2.44E-49		Selt
Anxa6			Shoc2	Zdhhc21	0.76298	9.41E-52	2.47E-49		Sema4f
Anxa7			Usp7	Zdhhc17	0.76286	9.96E-52	2.62E-49		Senp2
Anxa8			Atad1	Zdhhc21	0.76286	9.99E-52	2.62E-49		6-sep
Anxa9			Mtmr6	Zdhhc8	0.76282	1.02E-51	2.67E-49		Serinc1
Anxa10			Pcnxl2	Zdhhc17	0.76275	1.05E-51	2.76E-49		Setd7
Anxa11			Tcaf1	Zdhhc21	0.76267	1.09E-51	2.86E-49		Setx
Anxa13			Mtmr4	Zdhhc17	0.76251	1.18E-51	3.09E-49		Sfxn3
Aoah			Trim44	Zdhhc17	0.76249	1.19E-51	3.12E-49		Sh3bp5l
Aoc1			Ndrg4	Zdhhc17	0.76244	1.22E-51	3.19E-49		Shoc2
Aoc2			Adap1	Zdhhc21	0.76228	1.32E-51	3.45E-49		Slc12a6
Aoc3			Hecw1	Golga7b	0.76221	1.36E-51	3.57E-49		Slc25a12
Aopep			Unc13a	Zdhhc8	0.76219	1.37E-51	3.60E-49		Slc25a22
Aox1			Tbck	Zdhhc21	0.76216	1.40E-51	3.65E-49		Slc25a25
Aox2			Dync1li2	Zdhhc8	0.76211	1.43E-51	3.73E-49		Slc25a36
Aox3			Csnk1g3	Zdhhc8	0.76192	1.56E-51	4.09E-49		Slc25a46
Aox4			Ankrd46	Zdhhc3	0.76190	1.58E-51	4.13E-49		Slc25a51
Ap1b1			Trim3	Zdhhc17	0.76185	1.62E-51	4.24E-49		Slc27a4
Ap1g1			AI314180	Zdhhc8	0.76170	1.74E-51	4.54E-49		Slc2a3
Ap1g2			Sec23a	Zdhhc17	0.76163	1.80E-51	4.70E-49		Slc30a9
Ap1m1			Snx27	Zdhhc21	0.76158	1.84E-51	4.81E-49		Slc35e1
Ap1m2			Xpo6	Zdhhc21	0.76148	1.93E-51	5.03E-49		Slc36a1
Ap1s1			Ugcg	Zdhhc17	0.76148	1.94E-51	5.05E-49		Slc36a4
Ap1s2			Abca3	Zdhhc21	0.76144	1.97E-51	5.14E-49		Slc38a9
Ap1s3			Scn2b	Zdhhc17	0.76142	1.98E-51	5.17E-49		Slc39a9
Ap2a1			Zfand2a	Zdhhc21	0.76130	2.11E-51	5.48E-49		Slc41a2
Ap2a2			Elp3	Zdhhc17	0.76130	2.11E-51	5.48E-49		Slc45a1
Ap2b1			Rbsn	Zdhhc17	0.76124	2.16E-51	5.63E-49		Slc45a4
Ap2m1			Ube4b	Zdhhc8	0.76103	2.39E-51	6.23E-49		Slc6a15
Ap2s1			Glg1	Zdhhc21	0.76100	2.44E-51	6.33E-49		Slc7a14
Ap3b1			Marf1	Zdhhc21	0.76099	2.45E-51	6.35E-49		Smarcc1
Ap3b2			Rptor	Zdhhc17	0.76092	2.52E-51	6.54E-49		Smcr8
Ap3d1			Gsk3a	Zdhhc17	0.76070	2.81E-51	7.29E-49		Smim13
Ap3m1			Syp	Zdhhc17	0.76049	3.10E-51	8.03E-49		Snap91
Ap3m2			Tmod2	Zdhhc8	0.76047	3.14E-51	8.13E-49		Snph
Ap3s1			Nus1	Zdhhc17	0.76045	3.16E-51	8.18E-49		Snx10
Ap3s2			Rragc	Zdhhc21	0.76042	3.20E-51	8.30E-49		Snx13
Ap4b1			Tcf25	Zdhhc21	0.76019	3.57E-51	9.26E-49		Snx19
Ap4e1			Fam219a	Zdhhc8	0.76017	3.60E-51	9.34E-49		Snx25
Ap4m1			Clasp2	Zdhhc17	0.76009	3.74E-51	9.69E-49		Snx27
Ap4s1			Ube2j1	Zdhhc17	0.76009	3.76E-51	9.72E-49		Socs5
Ap5b1			Ube2h	Zdhhc17	0.75985	4.20E-51	1.09E-48		Socs7
Ap5m1			Ctif	Zdhhc17	0.75985	4.21E-51	1.09E-48		Sos1
Ap5s1			Vkorc1l1	Zdhhc8	0.75972	4.47E-51	1.16E-48		Spag9
Ap5z1			Icmt	Zdhhc21	0.75967	4.56E-51	1.18E-48		Spin1
Apaf1			Ywhag	Zdhhc8	0.75967	4.58E-51	1.18E-48		Spock2
Apba1			Neurl4	Zdhhc17	0.75948	5.01E-51	1.29E-48		Sppl3
Apba2			Agap3	Zdhhc17	0.75944	5.09E-51	1.32E-48		Spred2
Apba3			Map3k9	Zdhhc17	0.75941	5.17E-51	1.33E-48		Spryd7
Apbb1			Vps26b	Zdhhc17	0.75940	5.19E-51	1.34E-48		Sptan1
Apbb1ip			Wdr47	Zdhhc17	0.75924	5.61E-51	1.45E-48		Sptbn1
Apbb2			Ttll7	Zdhhc21	0.75917	5.79E-51	1.49E-48		Srgap3
Apbb3			Col4a3bp	Zdhhc21	0.75911	5.95E-51	1.53E-48		Srpk2
Apc			Scamp1	Zdhhc21	0.75911	5.96E-51	1.54E-48		Srxn1
Apc2			Atg13	Zdhhc17	0.75909	6.01E-51	1.55E-48		Ssbp3
Apcdd1			Pip4k2b	Zdhhc17	0.75908	6.04E-51	1.55E-48		St8sia3
Apcs			Ap3b2	Zdhhc17	0.75904	6.16E-51	1.58E-48		Stam
Apeh			Cdk16	Zdhhc3	0.75901	6.24E-51	1.61E-48		Stau2
Apela			Actr1b	Zdhhc3	0.75899	6.30E-51	1.62E-48		Stx1b
Apex1			Klc2	Zdhhc17	0.75889	6.60E-51	1.70E-48		Stxbp1
Apex2			Elavl2	Zdhhc21	0.75889	6.62E-51	1.70E-48		Stxbp5
Aph1a			Arl8a	Zdhhc8	0.75888	6.66E-51	1.71E-48		Sucla2
Aph1b			Chp1	Zdhhc8	0.75870	7.25E-51	1.86E-48		Sugp2
Aph1c			Tomm70a	Zdhhc17	0.75830	8.74E-51	2.24E-48		Sult4a1
Api5			Taok1	Zdhhc8	0.75809	9.65E-51	2.47E-48		Sv2a
Apip			Rbsn	Zdhhc21	0.75805	9.80E-51	2.51E-48		Svop
Aplf			Ppme1	Zdhhc21	0.75796	1.03E-50	2.63E-48		Syn1
Apln			Ranbp9	Zdhhc21	0.75795	1.03E-50	2.64E-48		Syngr1
Aplnr			Micu3	Zdhhc17	0.75787	1.07E-50	2.74E-48		Syngr3
Aplp1			Inpp4a	Zdhhc8	0.75784	1.08E-50	2.78E-48		Synj1
Aplp2			Setx	Zdhhc21	0.75782	1.09E-50	2.80E-48		Synj2bp
Apmap			Camta1	Zdhhc17	0.75777	1.12E-50	2.86E-48		Syp
Apoa1			Mob4	Zdhhc21	0.75773	1.14E-50	2.92E-48		Syt11
Apoa2			4932438A13Rik	Zdhhc21	0.75744	1.31E-50	3.34E-48		Syt4
Apoa4			Nploc4	Zdhhc17	0.75724	1.43E-50	3.66E-48		Tab3
Apoa5			Kif3c	Zdhhc8	0.75723	1.45E-50	3.69E-48		Tagap1
Apob			Fam219a	Zdhhc17	0.75722	1.45E-50	3.70E-48		Tanc2
Apobec1			Pdpk1	Zdhhc17	0.75702	1.59E-50	4.07E-48		Tango2
Apobec2			Trim44	Zdhhc8	0.75701	1.60E-50	4.09E-48		Taok1
Apobec3			Atp6v0a1	Golga7b	0.75700	1.61E-50	4.10E-48		Tardbp
Apobec4			Pi4ka	Zdhhc17	0.75699	1.62E-50	4.12E-48		Tbc1d10b
Apobr			Usp7	Zdhhc8	0.75696	1.64E-50	4.18E-48		Tbc1d13
Apoc1			Luc7l	Zdhhc21	0.75685	1.73E-50	4.40E-48		Tbc1d9
Apoc3			Snap25	Golga7b	0.75680	1.76E-50	4.49E-48		Tbc1d9b
Apoc4			Ackr1	Zdhhc17	0.75656	1.97E-50	5.02E-48		Tbck
Apod			Ppfia3	Golga7b	0.75643	2.09E-50	5.32E-48		Tcaf1
Apoe			March6	Zdhhc17	0.75641	2.11E-50	5.38E-48		Tcea2
Apof			Klhl12	Zdhhc17	0.75637	2.15E-50	5.48E-48		Tcf25
Apoh			Slc35e1	Zdhhc21	0.75615	2.39E-50	6.07E-48		Tesk1
Apom			Klc2	Golga7b	0.75610	2.45E-50	6.21E-48		Tex2
Apoo			Pafah1b2	Zdhhc21	0.75605	2.51E-50	6.36E-48		Tfrc
Apool			Atrn	Zdhhc17	0.75596	2.61E-50	6.64E-48		Tgoln1
App			Slc6a15	Zdhhc21	0.75589	2.70E-50	6.85E-48		Tigar
Appbp2			Kcnab2	Zdhhc3	0.75587	2.72E-50	6.91E-48		Tlk1
Appl1			Vps13d	Zdhhc21	0.75582	2.79E-50	7.06E-48		Tlk2
Appl2			Arfgef1	Zdhhc8	0.75561	3.07E-50	7.77E-48		Tmem127
Aprt			Prrc2b	Zdhhc8	0.75557	3.13E-50	7.92E-48		Tmem135
Aptx			Mark2	Zdhhc8	0.75555	3.16E-50	8.01E-48		Tmem151a
Aqp1			Tnk2	Zdhhc21	0.75546	3.29E-50	8.33E-48		Tmem151b
Aqp2			Tmod2	Zdhhc17	0.75541	3.36E-50	8.51E-48		Tmem189
Aqp3			Fxr2	Zdhhc21	0.75536	3.45E-50	8.73E-48		Tmem248
Aqp4			Pgm2l1	Zdhhc8	0.75535	3.46E-50	8.76E-48		Tmem25
Aqp5			Atmin	Zdhhc21	0.75533	3.49E-50	8.84E-48		Tmem259
Aqp6			Socs5	Zdhhc17	0.75530	3.54E-50	8.95E-48		Tmem30a
Aqp8			Tuba4a	Zdhhc17	0.75527	3.59E-50	9.06E-48		Tmem38a
Aqp9			Gopc	Zdhhc17	0.75526	3.61E-50	9.12E-48		Tmem50b
Aqp11			Gak	Zdhhc8	0.75524	3.64E-50	9.18E-48		Tmem56
Aqp12			Cpeb4	Zdhhc21	0.75510	3.90E-50	9.84E-48		Tmem57
Aqr			Tcaf1	Zdhhc17	0.75505	3.99E-50	1.01E-47		Tmem63b
Ar			Klhl12	Zdhhc21	0.75480	4.47E-50	1.13E-47		Tmem87b
Araf			Ulk1	Zdhhc21	0.75474	4.60E-50	1.16E-47		Tmem8b
Arap1			Tbc1d22b	Zdhhc17	0.75469	4.70E-50	1.19E-47		Tmod2
Arap2			Tnpo2	Zdhhc17	0.75457	4.97E-50	1.25E-47		Tmx3
Arap3			Map1b	Zdhhc17	0.75447	5.21E-50	1.31E-47		Tmx4
Arc			Pigk	Zdhhc21	0.75440	5.39E-50	1.36E-47		Tnk2
Arcn1			Atp13a2	Zdhhc21	0.75429	5.66E-50	1.42E-47		Tnpo2
Areg			Ppp2r5b	Zdhhc17	0.75416	6.01E-50	1.51E-47		Tollip
Arel1			Gnl3l	Zdhhc21	0.75415	6.03E-50	1.51E-47		Tom1l2
Arf1			Gmfb	Zdhhc8	0.75412	6.13E-50	1.54E-47		Tomm70a
Arf2			Eid2	Zdhhc17	0.75402	6.40E-50	1.61E-47		Trak1
Arf3			Slc41a2	Zdhhc17	0.75394	6.64E-50	1.67E-47		Trappc10
Arf4			Slc36a4	Zdhhc21	0.75390	6.77E-50	1.70E-47		Trappc11
Arf5			Plekha6	Zdhhc21	0.75376	7.21E-50	1.81E-47		Trappc12
Arf6			Ddx6	Zdhhc21	0.75372	7.37E-50	1.85E-47		Trappc9
Arfgap1			Golga3	Zdhhc17	0.75368	7.50E-50	1.88E-47		Trim2
Arfgap2			Rfwd2	Zdhhc21	0.75368	7.51E-50	1.88E-47		Trim23
Arfgap3			Rusc2	Zdhhc17	0.75365	7.59E-50	1.90E-47		Trim3
Arfgef1			Ppp2r5c	Zdhhc17	0.75357	7.87E-50	1.97E-47		Trim35
Arfgef2			Slc7a14	Zdhhc21	0.75350	8.15E-50	2.04E-47		Trim37
Arfgef3			Wipi2	Zdhhc21	0.75345	8.35E-50	2.09E-47		Trim44
Arfip2			Elavl4	Zdhhc21	0.75329	8.96E-50	2.24E-47		Trip12
Arfrp1			Uhmk1	Zdhhc8	0.75329	8.96E-50	2.24E-47		Trnp1
Arg1			Tmem127	Zdhhc21	0.75316	9.53E-50	2.38E-47		Trp53bp1
Arg2			Magee1	Zdhhc21	0.75314	9.62E-50	2.40E-47		Trpc4ap
Arglu1			Cadm3	Zdhhc21	0.75303	1.01E-49	2.52E-47		Tsc1
Arhgap1			Gdi1	Zdhhc17	0.75301	1.02E-49	2.55E-47		Tspyl1
Arhgap5			Rap1gap2	Zdhhc21	0.75299	1.03E-49	2.57E-47		Tspyl4
Arhgap6			Fam53c	Zdhhc21	0.75295	1.05E-49	2.61E-47		Ttbk1
Arhgap8			Diras1	Zdhhc17	0.75293	1.06E-49	2.64E-47		Ttbk2
Arhgap10			Atad1	Zdhhc17	0.75277	1.14E-49	2.84E-47		Ttc39b
Arhgap11a			Zdhhc21	Zdhhc8	0.75274	1.16E-49	2.88E-47		Ttc7b
Arhgap12			Zdhhc8	Zdhhc21	0.75274	1.16E-49	2.88E-47		Ttl
Arhgap15			Bmpr2	Zdhhc8	0.75268	1.18E-49	2.95E-47		Ttll11
Arhgap17			Socs5	Zdhhc21	0.75265	1.20E-49	2.99E-47		Ttll7
Arhgap18			Necap1	Zdhhc17	0.75262	1.22E-49	3.03E-47		Ttpal
Arhgap19			Dnajc27	Zdhhc21	0.75258	1.24E-49	3.10E-47		Tuba4a
Arhgap20			Cdk5r2	Zdhhc8	0.75254	1.27E-49	3.15E-47		Uba1
Arhgap10,Arhgap21			Usp33	Zdhhc21	0.75253	1.27E-49	3.16E-47		Uba6
Arhgap22			Kif1b	Zdhhc8	0.75251	1.28E-49	3.19E-47		Ube2h
Arhgap23			Fbxw11	Zdhhc8	0.75246	1.31E-49	3.26E-47		Ube2j1
Arhgap24			Vezt	Zdhhc8	0.75242	1.34E-49	3.32E-47		Ube2m
Arhgap25			Srxn1	Zdhhc17	0.75238	1.36E-49	3.37E-47		Ube2o
Arhgap27			Kif1a	Zdhhc3	0.75238	1.36E-49	3.38E-47		Ube2q1
Arhgap28			Tbc1d10b	Zdhhc21	0.75235	1.38E-49	3.43E-47		Ube2q2
Arhgap29			Pclo	Zdhhc21	0.75230	1.41E-49	3.50E-47		Ube2z
Arhgap30			Vps26b	Zdhhc21	0.75223	1.46E-49	3.62E-47		Ube3c
Arhgap31			Fam217b	Zdhhc21	0.75218	1.49E-49	3.70E-47		Ube4a
Arhgap32			5730409E04Rik	Zdhhc17	0.75214	1.52E-49	3.77E-47		Ube4b
Arhgap33			Wbp2	Zdhhc17	0.75210	1.55E-49	3.83E-47		Ubfd1
Arhgap35			Limk1	Zdhhc21	0.75204	1.59E-49	3.93E-47		Ubqln1
Arhgap36			Hspa12a	Zdhhc3	0.75198	1.63E-49	4.04E-47		Ubqln4
Arhgap39			Ank2	Zdhhc17	0.75194	1.67E-49	4.12E-47		Ubr2
Arhgap40			Ccdc92	Zdhhc17	0.75191	1.69E-49	4.17E-47		Ubr3
Arhgap42			Fam217b	Zdhhc17	0.75178	1.79E-49	4.41E-47		Ubr4
Arhgap44			Nxpe3	Zdhhc21	0.75164	1.90E-49	4.71E-47		Ubxn7
Arhgap45			Gnaz	Golga7b	0.75162	1.92E-49	4.75E-47		Ugcg
Arhgdib			Vwa5b2	Golga7b	0.75159	1.95E-49	4.82E-47		Uggt1
Arhgdig			Smim13	Zdhhc21	0.75158	1.96E-49	4.83E-47		Uhmk1
Arhgef1			Gnb1	Zdhhc3	0.75156	1.98E-49	4.87E-47		Uhrf1bp1l
Arhgef2			Ddhd2	Zdhhc21	0.75147	2.07E-49	5.09E-47		Ulk1
Arhgef3			Hecw1	Zdhhc17	0.75146	2.07E-49	5.11E-47		Unc13a
Arhgef4			Vezt	Zdhhc17	0.75140	2.13E-49	5.25E-47		Urgcp
Arhgef5			Zfyve9	Zdhhc17	0.75138	2.15E-49	5.29E-47		Uso1
Arhgef6			Sema4f	Zdhhc17	0.75137	2.16E-49	5.32E-47		Usp14
Arhgef7			Cd99l2	Zdhhc17	0.75121	2.32E-49	5.72E-47		Usp20
Arhgef9			Ctif	Zdhhc21	0.75118	2.35E-49	5.79E-47		Usp22
Arhgef10			Hnrnpul2	Zdhhc21	0.75116	2.37E-49	5.84E-47		Usp33
Arhgef10l			Ranbp6	Zdhhc17	0.75098	2.58E-49	6.34E-47		Usp34
Arhgef12			D17Wsu92e	Zdhhc3	0.75094	2.62E-49	6.44E-47		Usp45
Arhgef15			Pbx2	Zdhhc21	0.75089	2.69E-49	6.61E-47		Usp5
Arhgef16			Nxpe3	Zdhhc17	0.75083	2.75E-49	6.77E-47		Usp7
Arhgef17			Bod1	Zdhhc21	0.75083	2.76E-49	6.78E-47		Uspl1
Arhgef18			Zmat3	Zdhhc3	0.75062	3.03E-49	7.43E-47		Vamp1
Arhgef19			Ocrl	Zdhhc17	0.75059	3.08E-49	7.55E-47		Vcpip1
Arhgef25			Rc3h1	Zdhhc21	0.75058	3.08E-49	7.56E-47		Vdac1
Arhgef28			Snx10	Zdhhc21	0.75045	3.28E-49	8.03E-47		Vezt
Arhgef33			Kcnab2	Zdhhc21	0.75044	3.29E-49	8.07E-47		Vkorc1l1
Arhgef37			Dyrk1a	Zdhhc17	0.75033	3.47E-49	8.49E-47		Vps26b
Arhgef38			Dhdds	Zdhhc21	0.75023	3.63E-49	8.88E-47		Vps33a
Arhgef39			Add2	Zdhhc8	0.75019	3.69E-49	9.03E-47		Vps41
Arhgef40			Tbck	Zdhhc17	0.75015	3.76E-49	9.20E-47		Vps4a
Arid1a			Mapre2	Zdhhc21	0.75014	3.77E-49	9.23E-47		Wars
Arid1b			Fitm2	Zdhhc17	0.75014	3.78E-49	9.24E-47		Wasf3
Arid2			Col4a3bp	Zdhhc17	0.74999	4.04E-49	9.89E-47		Wasl
Arid3a			Trp53bp1	Zdhhc21	0.74990	4.20E-49	1.03E-46		Wbp2
Arid3b			Plekhb2	Zdhhc17	0.74979	4.42E-49	1.08E-46		Wdfy3
Arid3c			Rabgap1l	Zdhhc21	0.74977	4.45E-49	1.09E-46		Wdr11
Arid4b			Dpp9	Zdhhc17	0.74974	4.52E-49	1.10E-46		Wdr13
Arid5a			Azi2	Zdhhc21	0.74966	4.67E-49	1.14E-46		Wdr37
Arid5b			Htt	Zdhhc17	0.74934	5.41E-49	1.32E-46		Wdr47
Arih1			Dcp2	Zdhhc21	0.74930	5.51E-49	1.34E-46		Wdr7
Arih2			Slc25a46	Zdhhc8	0.74925	5.63E-49	1.37E-46		Whsc1
Arl1			Mroh1	Zdhhc21	0.74919	5.79E-49	1.41E-46		Wipf2
Arl2			Ago3	Zdhhc17	0.74915	5.88E-49	1.43E-46		Wipi2
Arl2bp			Tmem8b	Zdhhc21	0.74907	6.11E-49	1.49E-46		Wrnip1
Arl3			Panx2	Zdhhc3	0.74904	6.19E-49	1.51E-46		Wsb2
Arl4a			Cdk16	Zdhhc17	0.74903	6.21E-49	1.51E-46		Xpo6
Arl4c			Ttc7b	Zdhhc3	0.74894	6.49E-49	1.58E-46		Xpot
Arl4d			Prkci	Zdhhc8	0.74892	6.53E-49	1.59E-46		Ykt6
Arl5a			Aftph	Zdhhc21	0.74891	6.57E-49	1.60E-46		Ypel5
Arl5b			Asb1	Zdhhc21	0.74887	6.67E-49	1.62E-46		Ythdf1
Arl5c			Eif4g1	Zdhhc8	0.74885	6.75E-49	1.64E-46		Ywhab
Arl6			Trak1	Zdhhc21	0.74884	6.79E-49	1.65E-46		Ywhag
Arl6ip1			Pdzd8	Zdhhc21	0.74878	6.96E-49	1.69E-46		Ywhaz
Arl6ip4			Mapk8ip2	Golga7b	0.74877	6.98E-49	1.69E-46		Zbtb4
Arl6ip5			Mafg	Zdhhc21	0.74872	7.17E-49	1.74E-46		Zbtb7a
Arl6ip6			Sos1	Zdhhc21	0.74864	7.42E-49	1.80E-46		Zdhhc17
Arl8a			Reep2	Zdhhc21	0.74860	7.54E-49	1.83E-46		Zdhhc21
Arl8b			Dennd4a	Zdhhc21	0.74849	7.94E-49	1.92E-46		Zdhhc8
Arl10			Ranbp9	Zdhhc17	0.74840	8.26E-49	2.00E-46		Zer1
Arl11			Rc3h2	Zdhhc21	0.74832	8.56E-49	2.07E-46		Zfand2a
Arl13a			Pgm2l1	Golga7b	0.74831	8.59E-49	2.08E-46		Zfp318
Arl13b			Ap2a1	Zdhhc17	0.74831	8.61E-49	2.08E-46		Zfp451
Arl14ep			Tlk1	Zdhhc8	0.74824	8.85E-49	2.14E-46		Zfp827
Arl15			Mapk8ip3	Zdhhc3	0.74824	8.88E-49	2.15E-46		Zfyve27
Armc1			Syn1	Zdhhc3	0.74819	9.06E-49	2.19E-46		Zkscan1
Armc2			Ap1b1	Zdhhc17	0.74818	9.11E-49	2.20E-46		Zmat3
Armc3			Sec23a	Zdhhc8	0.74817	9.15E-49	2.21E-46		Zmiz2
Armc4			Ids	Zdhhc8	0.74813	9.33E-49	2.25E-46		Zyg11b
Armc5			Wdr11	Zdhhc21	0.74802	9.77E-49	2.36E-46		Zzef1
Armc6			Rab15	Zdhhc17	0.74801	9.83E-49	2.37E-46
Armc7			Uba6	Zdhhc21	0.74797	1.00E-48	2.42E-46
Armc8			Ppp2r1a	Zdhhc17	0.74791	1.03E-48	2.47E-46
Armc9			Kifap3	Zdhhc17	0.74790	1.03E-48	2.49E-46
Armc10			Trnp1	Zdhhc17	0.74789	1.04E-48	2.51E-46
Armcx1			Ehd3	Zdhhc21	0.74781	1.07E-48	2.59E-46
Armcx2			Ankrd13c	Zdhhc17	0.74776	1.10E-48	2.64E-46
Armcx3			Ppp2cb	Zdhhc8	0.74765	1.16E-48	2.78E-46
Armcx5			Raph1	Zdhhc21	0.74760	1.18E-48	2.85E-46
Armcx6			Prkab2	Zdhhc8	0.74760	1.18E-48	2.85E-46
Armh3			Atp9a	Zdhhc8	0.74746	1.26E-48	3.03E-46
Armh4			Srrm3	Golga7b	0.74746	1.26E-48	3.03E-46
Armt1			Cdc27	Zdhhc21	0.74737	1.31E-48	3.15E-46
Arnt			Napb	Golga7b	0.74734	1.32E-48	3.18E-46
Arnt2			Dnajc18	Zdhhc21	0.74718	1.43E-48	3.42E-46
Arntl			Fktn	Zdhhc21	0.74715	1.45E-48	3.47E-46
Arntl2			Lynx1	Zdhhc17	0.74712	1.46E-48	3.51E-46
Arpc1a			Brsk1	Zdhhc17	0.74711	1.47E-48	3.53E-46
Arpc1b			Ddi2	Zdhhc21	0.74708	1.49E-48	3.57E-46
Arpc2			Nmnat2	Zdhhc21	0.74704	1.52E-48	3.63E-46
Arpc3			Ube2z	Zdhhc8	0.74704	1.52E-48	3.64E-46
Arpc4			Mast1	Zdhhc17	0.74696	1.57E-48	3.77E-46
Arpc5			Usp32	Zdhhc8	0.74685	1.65E-48	3.95E-46
Arpc5l			Gdi1	Zdhhc21	0.74685	1.65E-48	3.95E-46
Arpin			Atxn7l3	Zdhhc5	0.74672	1.75E-48	4.19E-46
Arpp19			Rptor	Zdhhc21	0.74666	1.80E-48	4.30E-46
Arpp21			Rab11fip5	Zdhhc21	0.74661	1.84E-48	4.39E-46
Arr3			Spock2	Zdhhc17	0.74656	1.88E-48	4.48E-46
Arrb1			Cd99l2	Zdhhc21	0.74653	1.90E-48	4.54E-46
Arrb2			Maneal	Zdhhc21	0.74652	1.91E-48	4.57E-46
Arrdc1			Map3k12	Zdhhc17	0.74644	1.98E-48	4.73E-46
Arrdc2			Napg	Zdhhc3	0.74643	1.99E-48	4.74E-46
Arrdc3			Kidins220	Zdhhc17	0.74642	2.00E-48	4.76E-46
Arrdc4			Fam120b	Zdhhc17	0.74636	2.05E-48	4.90E-46
Arsa			Add2	Zdhhc21	0.74615	2.25E-48	5.37E-46
Arsb			Zbtb7a	Zdhhc21	0.74607	2.34E-48	5.57E-46
Arsg			Kif5a	Zdhhc8	0.74602	2.38E-48	5.68E-46
Arsi			Usp20	Zdhhc17	0.74599	2.42E-48	5.76E-46
Arsj			Akap6	Zdhhc8	0.74599	2.42E-48	5.77E-46
Arsk			Tmem135	Zdhhc21	0.74598	2.44E-48	5.80E-46
Art1			Sema4f	Zdhhc8	0.74597	2.44E-48	5.81E-46
Art3			Asb1	Zdhhc17	0.74593	2.48E-48	5.91E-46
Art4			Wdr47	Zdhhc21	0.74580	2.63E-48	6.26E-46
Art5			Zfand2a	Zdhhc8	0.74567	2.79E-48	6.63E-46
Artn			Rusc1	Zdhhc17	0.74563	2.84E-48	6.75E-46
Arv1			Napg	Golga7b	0.74562	2.85E-48	6.78E-46
Arvcf			Tnk2	Zdhhc17	0.74558	2.90E-48	6.88E-46
Arx			Mycbp2	Zdhhc17	0.74556	2.93E-48	6.96E-46
Arxes1			Lrsam1	Zdhhc17	0.74553	2.97E-48	7.05E-46
Arxes2			Pom121	Zdhhc21	0.74546	3.06E-48	7.25E-46
As3mt			Oxr1	Zdhhc21	0.74536	3.20E-48	7.59E-46
Asah1			Rmnd5a	Zdhhc21	0.74534	3.24E-48	7.67E-46
Asah2			Slc2a3	Zdhhc21	0.74525	3.35E-48	7.94E-46
Asap1			Dcun1d1	Zdhhc17	0.74520	3.44E-48	8.14E-46
Asap2			Gnl3l	Zdhhc17	0.74520	3.44E-48	8.14E-46
Asap3			Ubr2	Zdhhc21	0.74518	3.47E-48	8.21E-46
Asb1			Hecw1	Zdhhc21	0.74496	3.83E-48	9.05E-46
Asb2			Arfgef3	Zdhhc21	0.74482	4.07E-48	9.62E-46
Asb3			Ube2q1	Zdhhc17	0.74475	4.18E-48	9.89E-46
Asb4			Tgoln1	Zdhhc17	0.74470	4.28E-48	1.01E-45
Asb5			Adap1	Zdhhc3	0.74470	4.29E-48	1.01E-45
Asb6			Bsn	Zdhhc17	0.74469	4.30E-48	1.01E-45
Asb7			Clip3	Zdhhc17	0.74464	4.39E-48	1.04E-45
Asb8			Epb41l1	Zdhhc17	0.74463	4.41E-48	1.04E-45
Asb9			Rab6b	Zdhhc8	0.74463	4.42E-48	1.04E-45
Asb10			Cnst	Zdhhc21	0.74457	4.53E-48	1.07E-45
Asb11			Dync1li1	Zdhhc8	0.74450	4.68E-48	1.10E-45
Asb12			Ubr2	Zdhhc17	0.74448	4.71E-48	1.11E-45
Asb13			Rbm15b	Zdhhc21	0.74447	4.74E-48	1.12E-45
Asb14			Mgea5	Zdhhc21	0.74432	5.07E-48	1.19E-45
Asb15			Nrg3	Golga7b	0.74429	5.12E-48	1.21E-45
Asb16			Ppp3r1	Zdhhc17	0.74422	5.30E-48	1.25E-45
Asb17			Jph3	Zdhhc8	0.74409	5.60E-48	1.32E-45
Asb18			Slc25a36	Zdhhc21	0.74396	5.94E-48	1.40E-45
Ascc1			Bap1	Zdhhc21	0.74386	6.21E-48	1.46E-45
Ascc2			Naa25	Zdhhc21	0.74369	6.69E-48	1.57E-45
Ascc3			Cyfip2	Zdhhc3	0.74357	7.03E-48	1.65E-45
Ascl1			Gramd1b	Zdhhc21	0.74355	7.11E-48	1.67E-45
Ascl2			Tspyl1	Zdhhc8	0.74353	7.17E-48	1.68E-45
Ascl3			Rangap1	Zdhhc8	0.74342	7.54E-48	1.77E-45
Asf1a			Krt222	Zdhhc17	0.74331	7.88E-48	1.85E-45
Asf1b			Ranbp10	Zdhhc21	0.74330	7.91E-48	1.85E-45
Asgr1			9330182L06Rik	Zdhhc21	0.74305	8.85E-48	2.07E-45
Asgr2			Klhdc10	Zdhhc21	0.74302	8.94E-48	2.09E-45
Ash1l			Map3k10	Zdhhc21	0.74301	8.99E-48	2.11E-45
Ash2l			Atl1	Zdhhc17	0.74296	9.21E-48	2.16E-45
Asic1			Tmem135	Zdhhc17	0.74286	9.62E-48	2.25E-45
Asic2			Ctnna2	Zdhhc21	0.74277	1.00E-47	2.34E-45
Asic3			Uba1	Zdhhc17	0.74276	1.00E-47	2.35E-45
Asic4			Mfsd6	Zdhhc8	0.74270	1.03E-47	2.41E-45
Asl			Tmem57	Zdhhc21	0.74263	1.06E-47	2.48E-45
Asmt			Bace1	Zdhhc9	0.74263	1.06E-47	2.48E-45
Asns			Sacm1l	Zdhhc17	0.74257	1.09E-47	2.55E-45
Asnsd1			Snph	Golga7b	0.74245	1.15E-47	2.69E-45
Aspa			Map4	Zdhhc17	0.74243	1.16E-47	2.71E-45
Aspdh			Tcf25	Zdhhc3	0.74234	1.21E-47	2.81E-45
Aspg			Prkci	Zdhhc17	0.74225	1.25E-47	2.92E-45
Asph			Slc25a22	Zdhhc17	0.74217	1.30E-47	3.02E-45
Asphd1			Fbxw11	Zdhhc17	0.74206	1.36E-47	3.17E-45
Asphd2			Fam73b	Zdhhc17	0.74202	1.39E-47	3.23E-45
Aspm			Setd7	Zdhhc21	0.74196	1.43E-47	3.32E-45
Aspn			Ggnbp2	Zdhhc17	0.74187	1.48E-47	3.44E-45
Asprv1			Zmiz2	Zdhhc17	0.74177	1.55E-47	3.60E-45
Aspscr1			Phf8	Zdhhc21	0.74174	1.57E-47	3.64E-45
Asrgl1			Chrnb2	Zdhhc21	0.74173	1.57E-47	3.66E-45
Ass1			Ap3d1	Zdhhc17	0.74167	1.61E-47	3.75E-45
Aste1			Coa5	Zdhhc8	0.74165	1.63E-47	3.78E-45
Astn1			Bicd1	Zdhhc17	0.74152	1.72E-47	4.00E-45
Astn2			Snap91	Zdhhc17	0.74151	1.73E-47	4.01E-45
Asxl1			Ttc39b	Zdhhc21	0.74143	1.79E-47	4.15E-45
Asxl2			Csrp2bp	Zdhhc21	0.74135	1.86E-47	4.31E-45
Asxl3			Mark4	Zdhhc17	0.74129	1.90E-47	4.41E-45
Atad1			Zbtb4	Zdhhc17	0.74125	1.94E-47	4.50E-45
Atad2			Epb41l3	Zdhhc17	0.74124	1.94E-47	4.51E-45
Atad3a			Got2	Zdhhc3	0.74120	1.98E-47	4.59E-45
Atad5			Csnk1g3	Zdhhc17	0.74115	2.02E-47	4.69E-45
Atat1			Myo5a	Zdhhc8	0.74112	2.05E-47	4.74E-45
Atcay			Aak1	Zdhhc5	0.74106	2.10E-47	4.86E-45
Ate1			Rrm2b	Zdhhc21	0.74101	2.15E-47	4.97E-45
Atf1			Adss	Zdhhc17	0.74100	2.16E-47	4.99E-45
Atf2			Inpp5f	Zdhhc17	0.74096	2.19E-47	5.08E-45
Atf3			Cdc42bpb	Zdhhc8	0.74083	2.32E-47	5.37E-45
Atf4			Fto	Zdhhc20	0.74078	0	0
Atf5			Hspa12a	Zdhhc17	0.74073	2.43E-47	5.61E-45
Atf6			Gnaz	Zdhhc8	0.74071	2.45E-47	5.66E-45
Atf6b			Cpsf7	Zdhhc17	0.74057	2.60E-47	6.01E-45
Atf7			Ip6k1	Zdhhc17	0.74057	2.60E-47	6.01E-45
Atf7ip			Ranbp10	Zdhhc17	0.74041	2.78E-47	6.42E-45
Atg2a			Nkrf	Zdhhc17	0.74041	2.79E-47	6.44E-45
Atg2b			Bend6	Zdhhc17	0.74039	2.81E-47	6.48E-45
Atg3			Chrnb2	Zdhhc17	0.74028	2.95E-47	6.80E-45
Atg4a			Nus1	Zdhhc8	0.74026	2.98E-47	6.87E-45
Atg4b			Atp6v0a1	Zdhhc21	0.74019	3.06E-47	7.06E-45
Atg4c			Eid2	Zdhhc21	0.74015	3.12E-47	7.18E-45
Atg4d			Usp45	Zdhhc3	0.74012	3.16E-47	7.28E-45
Atg5			Hcfc1	Zdhhc17	0.74009	3.20E-47	7.37E-45
Atg7			Snap91	Golga7b	0.74007	3.23E-47	7.44E-45
Atg9a			Ogfod1	Zdhhc17	0.73979	3.64E-47	8.38E-45
Atg9b			Map3k10	Zdhhc17	0.73978	3.65E-47	8.40E-45
Atg10			Abcc5	Zdhhc21	0.73976	3.69E-47	8.49E-45
Atg12			Klc2	Zdhhc21	0.73959	3.97E-47	9.11E-45
Atg13			Atcay	Zdhhc17	0.73957	4.01E-47	9.22E-45
Atg14			Glyr1	Zdhhc17	0.73956	4.02E-47	9.22E-45
Atg16l1			Arf3	Zdhhc21	0.73955	4.04E-47	9.28E-45
Atg16l2			Add1	Zdhhc8	0.73951	4.11E-47	9.43E-45
Atg101			Ddhd2	Zdhhc17	0.73948	4.16E-47	9.53E-45
Atic			Map2k7.1	Zdhhc21	0.73948	4.16E-47	9.55E-45
Atl1			Bace1	Zdhhc21	0.73944	4.24E-47	9.73E-45
Atl2			Prune	Zdhhc21	0.73939	4.33E-47	9.93E-45
Atl3			Cbx6	Zdhhc21	0.73931	4.48E-47	1.03E-44
Atm			Tomm70a	Zdhhc8	0.73928	4.53E-47	1.04E-44
Atmin			Epg5	Zdhhc21	0.73926	4.58E-47	1.05E-44
Atn1			Gltscr1l	Zdhhc21	0.73915	4.79E-47	1.10E-44
Atoh1			Coro2a	Zdhhc21	0.73905	5.00E-47	1.14E-44
Atoh7			Sacm1l	Zdhhc21	0.73898	5.17E-47	1.18E-44
Atoh8			Pdpk1	Zdhhc8	0.73898	5.17E-47	1.18E-44
Atox1			Cacna1b	Zdhhc8	0.73897	5.18E-47	1.18E-44
Atp1a1			Rnf214	Zdhhc17	0.73887	5.42E-47	1.24E-44
Atp1a2			Tmem151a	Zdhhc17	0.73884	5.47E-47	1.25E-44
Atp1a3			Cend1	Zdhhc21	0.73884	5.48E-47	1.25E-44
Atp1a4			Rtn3	Zdhhc3	0.73884	5.49E-47	1.25E-44
Atp1b1			Pi4k2a	Zdhhc8	0.73881	5.54E-47	1.27E-44
Atp1b2			Atg4b	Zdhhc21	0.73880	5.57E-47	1.27E-44
Atp1b3			Ggnbp2	Zdhhc21	0.73878	5.62E-47	1.28E-44
Atp1b4			Rnf220	Zdhhc17	0.73877	5.66E-47	1.29E-44
Atp2a1			Uba1	Zdhhc3	0.73868	5.86E-47	1.34E-44
Atp2a2			Mapt	Zdhhc17	0.73861	6.04E-47	1.38E-44
Atp2a3			L1cam	Zdhhc2	0.73855	6.20E-47	1.41E-44
Atp2b1			Ndel1	Zdhhc8	0.73852	6.28E-47	1.43E-44
Atp2b2			Map1a	Zdhhc21	0.73851	6.31E-47	1.44E-44
Atp2b4			Atp6v1b2	Zdhhc21	0.73845	6.48E-47	1.47E-44
Atp2c1			Brap	Zdhhc8	0.73845	6.48E-47	1.47E-44
Atp2c2			Larp1	Zdhhc8	0.73825	7.06E-47	1.60E-44
Atp4a			Qrich1	Zdhhc21	0.73825	7.06E-47	1.61E-44
Atp5a1			Rabl6	Zdhhc17	0.73824	7.08E-47	1.61E-44
Atp5b			Cops2	Zdhhc17	0.73822	7.15E-47	1.62E-44
Atp5c1			Larp4	Zdhhc21	0.73815	7.36E-47	1.67E-44
Atp5d			Cpeb2	Zdhhc17	0.73810	7.53E-47	1.71E-44
Atp5e			Plekhm3	Zdhhc21	0.73795	8.03E-47	1.82E-44
Atp5g1			Hid1	Zdhhc17	0.73787	8.31E-47	1.89E-44
Atp5g2			Gabarapl1	Zdhhc17	0.73774	8.78E-47	1.99E-44
Atp5g3			Glyr1	Zdhhc21	0.73774	8.79E-47	1.99E-44
Atp5h			Tbc1d9	Zdhhc17	0.73773	8.84E-47	2.00E-44
Atp5j			Dst	Zdhhc2	0.73769	8.95E-47	2.03E-44
Atp5j2			Arhgap35	Zdhhc8	0.73768	8.99E-47	2.04E-44
Atp5k			Mapre3	Zdhhc17	0.73760	9.31E-47	2.11E-44
Atp5l			Pdzd8	Zdhhc17	0.73749	9.77E-47	2.21E-44
Atp5md			Ttc7b	Zdhhc8	0.73747	9.85E-47	2.23E-44
Atp5mpl			Cops2	Zdhhc21	0.73736	1.03E-46	2.34E-44
Atp5pb			Jakmip3	Zdhhc17	0.73735	1.04E-46	2.35E-44
Atp6ap1			Trnp1	Zdhhc21	0.73730	1.06E-46	2.39E-44
Atp6ap2			Rufy2	Zdhhc21	0.73729	1.07E-46	2.41E-44
Atp6v0a1			Ppm1b	Zdhhc17	0.73724	1.08E-46	2.45E-44
Atp6v0a2			Rusc1	Zdhhc3	0.73719	1.11E-46	2.51E-44
Atp6v0a4			Hecw1	Zdhhc3	0.73719	1.11E-46	2.51E-44
Atp6v0b			Pip4k2b	Zdhhc21	0.73718	1.12E-46	2.52E-44
Atp6v0d1			Rabgef1	Zdhhc17	0.73715	1.13E-46	2.55E-44
Atp6v0d2			Lpgat1	Zdhhc5	0.73714	1.13E-46	2.55E-44
Atp6v0e			Trappc9	Zdhhc21	0.73712	1.14E-46	2.57E-44
Atp6v0e2			Ubfd1	Zdhhc21	0.73705	1.18E-46	2.66E-44
Atp6v1a			Zfand2a	Zdhhc17	0.73700	1.20E-46	2.71E-44
Atp6v1b2			Gsk3a	Zdhhc3	0.73694	1.23E-46	2.78E-44
Atp6v1c1			3110043O21Rik	Zdhhc17	0.73693	1.24E-46	2.79E-44
Atp6v1c2			Dhx57	Zdhhc21	0.73688	1.27E-46	2.85E-44
Atp6v1d			Ncoa7	Golga7b	0.73687	1.27E-46	2.86E-44
Atp6v1e1			Afg3l2	Zdhhc17	0.73685	1.28E-46	2.88E-44
Atp6v1e2			Ube2q2	Zdhhc21	0.73683	1.30E-46	2.91E-44
Atp6v1f			Rimkla	Zdhhc17	0.73681	1.30E-46	2.93E-44
Atp6v1fnb			Atl1	Zdhhc8	0.73680	1.31E-46	2.95E-44
Atp6v1g1			Crbn	Zdhhc17	0.73671	1.36E-46	3.06E-44
Atp6v1g2			Lancl2	Zdhhc17	0.73670	1.37E-46	3.07E-44
Atp6v1h			Atg9a	Zdhhc21	0.73665	1.40E-46	3.14E-44
Atp7a			Fam126b	Zdhhc17	0.73664	1.40E-46	3.14E-44
Atp7b			Rab15	Zdhhc8	0.73663	1.41E-46	3.17E-44
Atp8a1			Bpnt1	Zdhhc21	0.73658	1.44E-46	3.23E-44
Atp8a2			Coro2a	Zdhhc8	0.73657	1.45E-46	3.24E-44
Atp8b1			Sh3bp5l	Zdhhc21	0.73650	1.49E-46	3.33E-44
Atp8b2			Prkacb	Zdhhc17	0.73639	1.56E-46	3.49E-44
Atp8b3			Erc2	Zdhhc8	0.73632	1.61E-46	3.61E-44
Atp8b5			Scamp5	Zdhhc21	0.73630	1.62E-46	3.63E-44
Atp9a			Rab15	Zdhhc21	0.73627	1.64E-46	3.67E-44
Atp9b			Hira	Zdhhc3	0.73627	1.64E-46	3.68E-44
Atp10a			Foxk2	Zdhhc8	0.73621	1.68E-46	3.76E-44
Atp11a			Dnaja3	Zdhhc17	0.73611	1.76E-46	3.92E-44
Atp11c			Rab6a	Zdhhc17	0.73605	1.80E-46	4.03E-44
Atp12a			Ackr1	Zdhhc21	0.73601	1.83E-46	4.09E-44
Atp13a1			Opa1	Zdhhc3	0.73596	1.87E-46	4.17E-44
Atp13a2			Reep1	Zdhhc8	0.73594	1.89E-46	4.21E-44
Atp13a3			Exoc6b	Zdhhc17	0.73580	2.00E-46	4.47E-44
Atp13a4			Ttbk1	Zdhhc17	0.73570	2.09E-46	4.66E-44
Atp13a5			Atmin	Zdhhc17	0.73556	2.22E-46	4.95E-44
Atp23			Ina	Zdhhc17	0.73556	2.22E-46	4.95E-44
Atpaf1			Npepps	Zdhhc3	0.73554	2.24E-46	4.98E-44
Atpaf2			Cpeb2	Zdhhc21	0.73546	2.32E-46	5.16E-44
Atpif1			Usp5	Zdhhc21	0.73541	2.37E-46	5.27E-44
Atpsckmt			Herc1	Zdhhc8	0.73540	2.37E-46	5.28E-44
Antxr1,Atr			Fam210a	Zdhhc21	0.73533	2.44E-46	5.43E-44
Atr			Trp53bp1	Zdhhc17	0.73529	2.49E-46	5.54E-44
Atraid			Aff4	Zdhhc17	0.73524	2.54E-46	5.64E-44
Atrip			Fbxl17	Zdhhc8	0.73512	2.67E-46	5.93E-44
Atrn			Mapk1	Zdhhc8	0.73505	2.75E-46	6.12E-44
Atrnl1			Syp	Golga7b	0.73500	2.80E-46	6.23E-44
Atrx			Ccdc149	Zdhhc17	0.73493	2.89E-46	6.43E-44
Atxn1			Dnm1l	Zdhhc8	0.73493	2.90E-46	6.44E-44
Atxn1l			Stau2	Zdhhc3	0.73489	2.94E-46	6.52E-44
Atxn2			Atf2	Zdhhc17	0.73489	2.94E-46	6.52E-44
Atxn2l			Vps33a	Zdhhc21	0.73484	3.01E-46	6.68E-44
Atxn3			Ulk1	Zdhhc17	0.73482	3.03E-46	6.72E-44
Atxn7			Cep170b	Zdhhc8	0.73472	3.16E-46	7.00E-44
Atxn7l1			Tmem127	Zdhhc3	0.73468	3.21E-46	7.12E-44
Atxn7l3			Dffa	Zdhhc17	0.73454	3.42E-46	7.57E-44
Atxn7l3b			Jph3	Golga7b	0.73453	3.43E-46	7.59E-44
Atxn10			Clip3	Zdhhc21	0.73440	3.62E-46	8.00E-44
Auh			Nipal3	Zdhhc17	0.73440	3.62E-46	8.00E-44
Aunip			Ergic1	Zdhhc5	0.73436	3.68E-46	8.13E-44
Aup1			Syngr1	Zdhhc17	0.73433	3.72E-46	8.22E-44
Aurka			Gnl1	Zdhhc17	0.73432	3.75E-46	8.28E-44
Aip,Aurkaip1			Pik3ca	Zdhhc21	0.73424	3.86E-46	8.54E-44
Aurkb			Nudcd3	Zdhhc17	0.73420	3.94E-46	8.70E-44
Aurkc			Plekhb2	Zdhhc21	0.73416	4.00E-46	8.84E-44
Auts2			Fam210a	Zdhhc17	0.73416	4.01E-46	8.85E-44
Aven			Arhgap44	Golga7b	0.73405	4.18E-46	9.23E-44
Avil			Lztr1	Zdhhc8	0.73390	4.46E-46	9.83E-44
Avl9			Gopc	Zdhhc8	0.73390	4.47E-46	9.86E-44
Avp			Dgke	Zdhhc17	0.73388	4.50E-46	9.93E-44
Avpi1			D17Wsu92e	Zdhhc8	0.73374	4.76E-46	1.05E-43
Avpr1a			Dgke	Zdhhc21	0.73369	4.87E-46	1.07E-43
Avpr1b			Ralgapa1	Zdhhc3	0.73368	4.90E-46	1.08E-43
Avpr2			Map6	Zdhhc17	0.73365	4.96E-46	1.09E-43
Awat2			Pom121	Zdhhc17	0.73365	4.96E-46	1.09E-43
Axdnd1			Ccdc92	Zdhhc21	0.73359	5.08E-46	1.12E-43
Axin1			Limk2	Zdhhc17	0.73354	5.20E-46	1.14E-43
Axin2			Ube2o	Zdhhc3	0.73344	5.40E-46	1.19E-43
Axl			Alg2	Zdhhc21	0.73319	6.02E-46	1.32E-43
Azgp1			Arhgef18	Zdhhc21	0.73318	6.03E-46	1.33E-43
Azi2			Srpk2	Zdhhc21	0.73313	6.16E-46	1.35E-43
Azin1			Cacul1	Zdhhc21	0.73308	6.28E-46	1.38E-43
Azin2			Huwe1	Zdhhc21	0.73305	6.38E-46	1.40E-43
B2m			Ndrg3	Golga7b	0.73303	6.42E-46	1.41E-43
B3galnt1			Limk2	Zdhhc21	0.73302	6.46E-46	1.42E-43
B3galnt2			Tex2	Zdhhc17	0.73295	6.64E-46	1.46E-43
B3galt1			Ppp3cb	Zdhhc3	0.73281	7.03E-46	1.54E-43
B3galt2			Cdc27	Zdhhc17	0.73265	7.54E-46	1.65E-43
B3galt4			Dcun1d4	Zdhhc17	0.73264	7.55E-46	1.65E-43
B3galt5			Usp34	Zdhhc21	0.73256	7.83E-46	1.71E-43
B3galt6			Alg2	Zdhhc17	0.73256	7.83E-46	1.71E-43
B3gat1			Rap1gds1	Zdhhc3	0.73255	7.85E-46	1.72E-43
B3gat2			Rps6kb1	Zdhhc21	0.73255	7.85E-46	1.72E-43
B3gat3			Fam73b	Zdhhc5	0.73255	7.86E-46	1.72E-43
B3glct			Ppp3r1	Golga7b	0.73244	8.21E-46	1.80E-43
B3gnt2			Atp2a2	Zdhhc17	0.73241	8.32E-46	1.82E-43
B3gnt3			Acp2	Zdhhc21	0.73240	8.35E-46	1.83E-43
B3gnt4			Lrrc59	Zdhhc3	0.73220	9.09E-46	1.99E-43
B3gnt5			Trak2	Zdhhc21	0.73210	9.49E-46	2.07E-43
B3gnt6			Dzank1	Zdhhc17	0.73209	9.51E-46	2.08E-43
B3gnt7			Tspyl4	Zdhhc17	0.73205	9.69E-46	2.12E-43
B3gnt8			Mtmr4	Zdhhc21	0.73198	9.94E-46	2.17E-43
B3gnt9			Nars	Zdhhc21	0.73197	1.00E-45	2.18E-43
B3gntl1			Aes	Zdhhc17	0.73191	1.02E-45	2.23E-43
B4galnt1			Nipal3	Zdhhc21	0.73182	1.06E-45	2.32E-43
B4galnt2			Tab3	Zdhhc21	0.73176	1.09E-45	2.37E-43
B4galnt3			Zfyve9	Zdhhc3	0.73176	1.09E-45	2.38E-43
B4galnt4			Apba1	Zdhhc21	0.73175	1.09E-45	2.39E-43
B4galt1			Ergic1	Zdhhc21	0.73174	1.10E-45	2.39E-43
B4galt2			Fbxo41	Golga7b	0.73172	1.11E-45	2.41E-43
B4galt3			Cmip	Zdhhc21	0.73170	1.12E-45	2.44E-43
B4galt4			Pip4k2b	Zdhhc8	0.73163	1.15E-45	2.50E-43
B4galt5			Dhx57	Zdhhc17	0.73163	1.15E-45	2.51E-43
B4galt6			Ppp2r2c	Zdhhc3	0.73156	1.19E-45	2.58E-43
B4galt7			Ttl	Zdhhc8	0.73145	1.24E-45	2.70E-43
B3gnt6,B4gat1			Ggt7	Zdhhc17	0.73141	1.26E-45	2.74E-43
B9d1			Dip2c	Zdhhc8	0.73122	1.37E-45	2.97E-43
B9d2			Limk1	Zdhhc17	0.73119	1.38E-45	3.00E-43
Baalc			Rell2	Zdhhc17	0.73110	1.43E-45	3.11E-43
Baat			Ubqln4	Zdhhc17	0.73108	1.45E-45	3.14E-43
Babam1			Serinc1	Zdhhc8	0.73108	1.45E-45	3.14E-43
Babam2			Atg2b	Zdhhc21	0.73106	1.46E-45	3.17E-43
Bace1			Mfn2	Zdhhc8	0.73088	1.57E-45	3.40E-43
Bace2			Pdha1	Zdhhc3	0.73087	1.58E-45	3.41E-43
Bach1			Hace1	Zdhhc21	0.73086	1.58E-45	3.43E-43
Bach2			Pigp	Selk	0.73081	1.61E-45	3.50E-43
Bad			Atg16l1	Zdhhc17	0.73074	1.66E-45	3.60E-43
Bag1			Prkar1b	Zdhhc17	0.73074	1.67E-45	3.61E-43
Bag2			Myo5a	Zdhhc3	0.73067	1.72E-45	3.71E-43
Bag3			Brox	Zdhhc21	0.73060	1.77E-45	3.82E-43
Bag4			Dst	Zdhhc17	0.73056	1.80E-45	3.89E-43
Bag5			Jph3	Zdhhc21	0.73055	1.80E-45	3.89E-43
Bag6			Gpr137	Zdhhc21	0.73055	1.80E-45	3.90E-43
Bahcc1			Zyg11b	Zdhhc8	0.73035	1.95E-45	4.22E-43
Bahd1			Adap1	Zdhhc8	0.73031	1.99E-45	4.29E-43
Baiap2			Rnf19b	Zdhhc8	0.73031	1.99E-45	4.30E-43
Baiap2l1			Prkar1a	Zdhhc21	0.73031	1.99E-45	4.30E-43
Baiap2l2			Gnao1	Zdhhc21	0.73029	2.00E-45	4.32E-43
Baiap3			Spock2	Zdhhc21	0.73028	2.01E-45	4.35E-43
Bak1			Pja2	Zdhhc8	0.73028	2.02E-45	4.35E-43
Bambi			Braf	Zdhhc17	0.73022	2.06E-45	4.44E-43
Banf1			Hira	Zdhhc21	0.73021	2.07E-45	4.46E-43
Banf2			Dync1li2	Zdhhc3	0.73013	2.14E-45	4.62E-43
Bank1			Setd7	Zdhhc17	0.73008	2.18E-45	4.70E-43
Banp			Trappc12	Zdhhc17	0.73001	2.25E-45	4.84E-43
Bap1			Actr1a	Zdhhc17	0.72999	2.27E-45	4.89E-43
Bard1			Nav1	Zdhhc21	0.72984	2.41E-45	5.19E-43
Barhl1			Tmem56	Zdhhc21	0.72981	2.45E-45	5.27E-43
Barhl2			Lrp3	Zdhhc21	0.72979	2.47E-45	5.30E-43
Barx2			Ice1	Zdhhc21	0.72978	2.48E-45	5.32E-43
Basp1			Zfyve9	Zdhhc21	0.72977	2.49E-45	5.35E-43
Batf			Cdkl2	Zdhhc8	0.72967	2.59E-45	5.56E-43
Batf2			Lrfn1	Zdhhc21	0.72965	2.62E-45	5.62E-43
Batf3			March6	Zdhhc8	0.72960	2.66E-45	5.71E-43
Bax			Abca3	Zdhhc8	0.72954	2.73E-45	5.85E-43
Baz1a			Tnpo2	Zdhhc5	0.72953	2.74E-45	5.88E-43
Baz1b			Ehd3	Zdhhc17	0.72952	2.75E-45	5.90E-43
Baz2a			Gnptab	Zdhhc17	0.72952	2.76E-45	5.91E-43
Bbc3			Pcyox1	Zdhhc8	0.72950	2.77E-45	5.95E-43
Bbof1			Rb1cc1	Zdhhc8	0.72948	2.80E-45	6.00E-43
Bbox1			Crbn	Zdhhc21	0.72948	2.80E-45	6.00E-43
Bbs1			2310035C23Rik	Zdhhc17	0.72942	2.87E-45	6.15E-43
Bbs2			Nmnat2	Zdhhc17	0.72940	2.89E-45	6.19E-43
Bbs4			Bicd1	Zdhhc21	0.72940	2.90E-45	6.20E-43
Bbs5			Rbm15b	Zdhhc8	0.72938	2.92E-45	6.24E-43
Bbs7			Cep170b	Golga7b	0.72931	3.00E-45	6.42E-43
Bbs9			Mapk10	Golga7b	0.72931	3.01E-45	6.43E-43
Bbs10			Mtx3	Zdhhc17	0.72927	3.05E-45	6.52E-43
Bbs12			Cobl	Zdhhc8	0.72922	3.12E-45	6.66E-43
Bbx			Arhgap23	Zdhhc9	0.72920	3.15E-45	6.72E-43
Bcam			Setx	Zdhhc17	0.72909	3.29E-45	7.02E-43
Bcan			Pigk	Zdhhc17	0.72903	3.37E-45	7.19E-43
Bcap29			Sh3gl2	Golga7b	0.72900	3.40E-45	7.26E-43
Bcap31			Senp2	Zdhhc17	0.72899	3.43E-45	7.32E-43
Bcar1			Gak	Zdhhc3	0.72895	3.48E-45	7.43E-43
Bcar3			Bmpr2	Zdhhc17	0.72894	3.50E-45	7.46E-43
Bcas1			Mief1	Zdhhc21	0.72892	3.53E-45	7.52E-43
Bcas2			Rab3gap1	Zdhhc17	0.72887	3.60E-45	7.67E-43
Bcas3			Becn1	Zdhhc8	0.72885	3.63E-45	7.74E-43
Bcat1			Arel1	Zdhhc17	0.72881	3.69E-45	7.86E-43
Bcat2			Rap1gap2	Golga7b	0.72879	3.71E-45	7.90E-43
Bccip			Azi2	Zdhhc8	0.72869	3.87E-45	8.23E-43
Bcdin3d			Kcnq2	Zdhhc17	0.72868	3.89E-45	8.28E-43
Bche			Nploc4	Zdhhc8	0.72860	4.03E-45	8.56E-43
Bckdha			Mdn1	Zdhhc17	0.72857	4.07E-45	8.66E-43
Bckdhb			Stx1b	Zdhhc17	0.72852	4.15E-45	8.82E-43
Bckdk			Elavl2	Zdhhc17	0.72845	4.28E-45	9.08E-43
Bcl2			Unc13a	Zdhhc17	0.72839	4.38E-45	9.29E-43
Bcl2a1a			Sppl3	Zdhhc8	0.72832	4.50E-45	9.55E-43
Bcl2l1			Larp4b	Zdhhc8	0.72832	4.51E-45	9.58E-43
Bcl2l2			Herc3	Golga7b	0.72821	4.72E-45	1.00E-42
Bcl2l11			Zmat3	Zdhhc8	0.72820	4.74E-45	1.01E-42
Bcl2l13			Oxr1	Zdhhc17	0.72819	4.74E-45	1.01E-42
Bcl2l15			Pbx2	Zdhhc8	0.72817	4.80E-45	1.02E-42
Bcl3			Mapt	Zdhhc21	0.72809	4.95E-45	1.05E-42
Bcl6			Ostm1	Zdhhc17	0.72806	5.02E-45	1.06E-42
Bcl6b			Trappc9	Zdhhc17	0.72804	5.06E-45	1.07E-42
Bcl7a			Snx13	Zdhhc21	0.72793	5.29E-45	1.12E-42
Bcl7b			Rabl6	Zdhhc8	0.72784	5.48E-45	1.16E-42
Bcl7c			Plekhm3	Zdhhc17	0.72784	5.48E-45	1.16E-42
Bcl9			Fbxo21	Zdhhc17	0.72782	5.54E-45	1.17E-42
Bcl9l			Ncoa7	Zdhhc17	0.72778	5.61E-45	1.19E-42
Bcl10			Cplx1	Zdhhc17	0.72773	5.73E-45	1.21E-42
Bcl11a			H3f3b	Zdhhc17	-0.72766	5.91E-45	1.25E-42
Bclaf1			Casc3	Zdhhc21	0.72765	5.92E-45	1.25E-42
Bclaf3			Socs7	Zdhhc21	0.72765	5.94E-45	1.25E-42
Bco1			Iqsec2	Zdhhc8	0.72762	6.00E-45	1.27E-42
Bco2			Pitpna	Zdhhc8	0.72758	6.09E-45	1.29E-42
Bcor			Bcl2l2	Zdhhc3	0.72758	6.10E-45	1.29E-42
Bcorl1			Kifap3	Golga7b	0.72754	6.20E-45	1.31E-42
Bcr			Wrnip1	Zdhhc21	0.72749	6.33E-45	1.34E-42
Bcs1l			Dst	Zdhhc8	0.72745	6.42E-45	1.35E-42
Bdh1			Rab5b	Zdhhc21	0.72734	6.71E-45	1.41E-42
Bdh2			Rab6b	Zdhhc3	0.72731	6.82E-45	1.44E-42
Bdkrb1			Agap3	Golga7b	0.72722	7.08E-45	1.49E-42
Bdkrb2			Gapvd1	Zdhhc21	0.72717	7.20E-45	1.52E-42
Bdnf			Add2	Zdhhc17	0.72714	7.30E-45	1.54E-42
Bdp1			Agap3	Zdhhc21	0.72710	7.41E-45	1.56E-42
Bean1			Lmbr1	Zdhhc3	0.72709	7.46E-45	1.57E-42
Becn1			Gramd1b	Zdhhc17	0.72706	7.55E-45	1.59E-42
Begain			Atg4b	Zdhhc3	0.72705	7.58E-45	1.59E-42
Bend3			Eif2ak1	Zdhhc17	0.72700	7.72E-45	1.62E-42
Bend4			Wdr7	Zdhhc3	0.72700	7.73E-45	1.62E-42
Bend5			Dcaf5	Zdhhc8	0.72696	7.86E-45	1.65E-42
Bend6			Ipo5	Zdhhc17	0.72695	7.88E-45	1.65E-42
Bend7			Kif5a	Zdhhc3	0.72695	7.89E-45	1.66E-42
Best1			Mtmr6	Zdhhc17	0.72694	7.92E-45	1.66E-42
Best3			Rtn3	Zdhhc8	0.72692	7.98E-45	1.67E-42
Bet1			Reep2	Golga7b	0.72691	8.01E-45	1.68E-42
Bet1l			Azi2	Zdhhc17	0.72690	8.06E-45	1.69E-42
Bex1			Vkorc1l1	Zdhhc17	0.72687	8.13E-45	1.70E-42
Bex2			Tesk1	Zdhhc3	0.72687	8.15E-45	1.71E-42
Bex3			9330159F19Rik	Zdhhc8	0.72674	8.59E-45	1.80E-42
Bex4			Ppp2r5b	Zdhhc21	0.72670	8.72E-45	1.83E-42
Bfar			Etnk1	Zdhhc8	0.72670	8.73E-45	1.83E-42
Bfsp1			Sptbn1	Zdhhc8	0.72669	8.76E-45	1.83E-42
Bfsp2			Map3k10	Zdhhc3	0.72667	8.84E-45	1.85E-42
Bglap			Ncoa7	Zdhhc8	0.72663	8.99E-45	1.88E-42
Bglap2			Tesk1	Zdhhc21	0.72660	9.10E-45	1.90E-42
Bglap3			Ubxn7	Zdhhc21	0.72659	9.11E-45	1.90E-42
Bgn			Far1	Zdhhc21	0.72658	9.15E-45	1.91E-42
Bhlha9			E130309D14Rik	Zdhhc21	0.72657	9.19E-45	1.92E-42
Bhlha15			Rnf157	Zdhhc21	0.72654	9.33E-45	1.95E-42
Bhlhb9			Dyrk1a	Zdhhc8	0.72639	9.88E-45	2.06E-42
Bhlhe22			Mia3	Zdhhc17	0.72637	1.00E-44	2.09E-42
Bhlhe23			Whsc1	Zdhhc3	0.72633	1.01E-44	2.11E-42
Bhlhe40			Ywhaz	Golga7b	0.72630	1.03E-44	2.14E-42
Bhlhe41			Dffa	Zdhhc21	0.72610	1.11E-44	2.32E-42
Bhmt			Cmip	Zdhhc17	0.72609	1.12E-44	2.33E-42
Bhmt2			Ralgapa1	Zdhhc8	0.72608	1.12E-44	2.34E-42
Bicc1			Tmem8b	Zdhhc8	0.72602	1.15E-44	2.40E-42
Bicd1			Kpna6	Zdhhc5	0.72591	1.20E-44	2.50E-42
Bicd2			Hras	Zdhhc8	0.72582	1.25E-44	2.60E-42
Bicdl1			Tmem127	Zdhhc5	0.72579	1.26E-44	2.62E-42
Bicra			Fam168b	Zdhhc3	0.72572	1.30E-44	2.70E-42
Bicral			Vamp1	Zdhhc21	0.72570	1.31E-44	2.73E-42
Bid			Copg2	Zdhhc17	0.72567	1.32E-44	2.75E-42
Bik			Wdr13	Zdhhc21	0.72564	1.34E-44	2.79E-42
Bin1			Abce1	Zdhhc17	0.72556	1.39E-44	2.88E-42
Bin2			Clcn3	Zdhhc17	0.72554	1.40E-44	2.90E-42
Bin3			Kifap3	Zdhhc3	0.72549	1.42E-44	2.96E-42
Birc2			Arih1	Zdhhc8	0.72542	1.47E-44	3.04E-42
Birc3			Pfkp	Zdhhc17	0.72541	1.47E-44	3.05E-42
Birc5			Wipf2	Zdhhc17	0.72538	1.49E-44	3.09E-42
Birc6			Clasp2	Zdhhc21	0.72537	1.50E-44	3.10E-42
Birc7			Luc7l	Zdhhc17	0.72536	1.50E-44	3.12E-42
Bivm			Nyap1	Zdhhc17	0.72527	1.56E-44	3.23E-42
Blcap			Kif1a	Zdhhc8	0.72523	1.58E-44	3.27E-42
Blm			Got2	Zdhhc21	0.72508	1.68E-44	3.48E-42
Blmh			Slc25a22	Golga7b	0.72507	1.69E-44	3.49E-42
Blnk			Zyg11b	Zdhhc5	0.72507	1.69E-44	3.50E-42
Bloc1s1			Rnf208	Golga7b	0.72502	1.72E-44	3.57E-42
Bloc1s2			Klhdc10	Zdhhc17	0.72497	1.76E-44	3.64E-42
Bloc1s3			Ywhag	Zdhhc3	0.72496	1.76E-44	3.64E-42
Bloc1s4			Ltn1	Zdhhc17	0.72495	1.77E-44	3.66E-42
Bloc1s5			Prune2	Zdhhc21	0.72492	1.79E-44	3.71E-42
Bloc1s6			Aatk	Zdhhc17	0.72491	1.80E-44	3.72E-42
Blvra			Cltc	Zdhhc21	0.72490	1.81E-44	3.73E-42
Blvrb			Rnf19b	Zdhhc17	0.72487	1.83E-44	3.78E-42
Blzf1			Tlk1	Zdhhc21	0.72483	1.86E-44	3.83E-42
Bmerb1			Elp3	Zdhhc21	0.72481	1.88E-44	3.87E-42
Bmf			Kif21a	Zdhhc21	0.72475	1.92E-44	3.97E-42
Bmi1			Kif3b	Zdhhc8	0.72469	1.97E-44	4.06E-42
Bmp1			Usp45	Zdhhc8	0.72460	2.04E-44	4.20E-42
Bmp2			Mdn1	Zdhhc21	0.72450	2.13E-44	4.38E-42
Bmp2k			Gpd1l	Zdhhc8	0.72447	2.15E-44	4.43E-42
Bmp3			Cyp4x1	Zdhhc17	0.72446	2.16E-44	4.45E-42
Bmp4			Stam	Zdhhc17	0.72443	2.18E-44	4.50E-42
Bmp5			Uso1	Zdhhc8	0.72442	2.19E-44	4.52E-42
Bmp6			Acsl4	Zdhhc21	0.72439	2.22E-44	4.56E-42
Bmp7			Slc25a22	Zdhhc21	0.72437	2.24E-44	4.60E-42
Bmp8a			Dpp9	Zdhhc3	0.72429	2.32E-44	4.76E-42
Bmp8b			Emc1	Zdhhc17	0.72424	2.36E-44	4.85E-42
Bmp15			Kif2a	Zdhhc21	0.72422	2.38E-44	4.88E-42
Bmper			Grk6	Zdhhc21	0.72419	2.41E-44	4.95E-42
Bmpr1a			Rhot1	Zdhhc3	0.72406	2.53E-44	5.20E-42
Bmpr1b			Kbtbd2	Zdhhc17	0.72398	2.62E-44	5.38E-42
Bmpr2			Csde1	Zdhhc8	0.72387	2.73E-44	5.61E-42
Bmt2			Nefl	Zdhhc17	0.72386	2.75E-44	5.64E-42
Bmx			Phlpp2	Zdhhc17	0.72384	2.77E-44	5.68E-42
Bmyc			Pgm2l1	Zdhhc3	0.72380	2.81E-44	5.77E-42
Bnc1			Acvr1b	Zdhhc17	0.72376	2.86E-44	5.87E-42
Bnc2			Aak1	Zdhhc3	0.72375	2.87E-44	5.89E-42
Bnip1			Rab21	Zdhhc21	0.72372	2.90E-44	5.95E-42
Bnip2			5730455P16Rik	Zdhhc8	0.72370	2.92E-44	5.99E-42
Bnip3			Dcun1d2	Zdhhc21	0.72369	2.95E-44	6.03E-42
Bnip3l			Xpot	Zdhhc21	0.72368	2.95E-44	6.03E-42
Bnip5			Gnaz	Zdhhc21	0.72356	3.10E-44	6.34E-42
Bnipl			Pi4k2a	Zdhhc3	0.72352	3.15E-44	6.43E-42
Boc			Vps33a	Zdhhc17	0.72351	3.17E-44	6.48E-42
Bod1			Gpd1l	Zdhhc21	0.72349	3.19E-44	6.52E-42
Bod1l			Fktn	Zdhhc17	0.72345	3.24E-44	6.62E-42
Bok			Btrc	Zdhhc17	0.72342	3.28E-44	6.69E-42
Bola1			Urgcp	Zdhhc17	0.72338	3.33E-44	6.81E-42
Bola2			H3f3a	Zdhhc17	-0.72336	3.36E-44	6.86E-42
Bola3			Hace1	Zdhhc8	0.72335	3.37E-44	6.87E-42
Bop1			Clasp1	Zdhhc17	0.72333	3.39E-44	6.93E-42
Bora			Slc35e1	Zdhhc17	0.72328	3.47E-44	7.08E-42
Borcs5			Cry2	Zdhhc21	0.72326	3.49E-44	7.12E-42
Borcs6			Hnrnpul2	Zdhhc17	0.72326	3.50E-44	7.13E-42
Borcs7			Mapk1	Zdhhc17	0.72325	3.50E-44	7.14E-42
Borcs8			Fam20b	Zdhhc17	0.72324	3.52E-44	7.17E-42
Bpgm			Slc7a14	Zdhhc17	0.72324	3.53E-44	7.18E-42
Bphl			Enpp5	Zdhhc17	0.72317	3.63E-44	7.39E-42
Bpifa1			Def8	Zdhhc21	0.72314	3.66E-44	7.46E-42
Bpifa5			Wdr7	Golga7b	0.72311	3.71E-44	7.56E-42
Bpifb1			Trappc11	Zdhhc17	0.72308	3.75E-44	7.63E-42
Bpifb2			Kdsr	Zdhhc21	0.72307	3.76E-44	7.65E-42
Bpifb3			Tmem151a	Abhd17a	0.72277	4.25E-44	8.64E-42
Bpifb4			Ttc7b	Golga7b	0.72276	4.26E-44	8.66E-42
Bpifb6			Cramp1l	Zdhhc21	0.72276	4.27E-44	8.68E-42
Bpifb9a			Rbfox2	Zdhhc17	0.72265	4.46E-44	9.06E-42
Bpifc			Fam53c	Zdhhc17	0.72260	4.54E-44	9.22E-42
Bpnt1			Mapre2	Zdhhc17	0.72260	4.56E-44	9.25E-42
Bpnt2			Ppp2cb	Zdhhc17	0.72259	4.56E-44	9.25E-42
Braf			Slc45a4	Zdhhc17	0.72255	4.64E-44	9.42E-42
Brap			Cry2	Zdhhc8	0.72255	4.64E-44	9.42E-42
Brat1			Fam234b	Zdhhc17	0.72254	4.65E-44	9.43E-42
Brca1			Rcor3	Zdhhc21	0.72252	4.69E-44	9.51E-42
Brca2			Mturn	Zdhhc21	0.72251	4.72E-44	9.56E-42
Brcc3			Eif4enif1	Zdhhc8	0.72249	4.75E-44	9.62E-42
Brd1			Cyfip2	Zdhhc8	0.72242	4.89E-44	9.91E-42
Brd2			Arl8b	Zdhhc8	0.72240	4.94E-44	9.99E-42
Brd3			Kpna1	Zdhhc8	0.72238	4.97E-44	1.01E-41
Brd4			Icmt	Zdhhc8	0.72234	5.05E-44	1.02E-41
Brd7			Rab39b	Zdhhc17	0.72233	5.07E-44	1.03E-41
Brd8			Dusp3	Zdhhc8	0.72232	5.09E-44	1.03E-41
Brd9			Rrn3	Zdhhc17	0.72228	5.17E-44	1.05E-41
Brdt			Rdh13	Zdhhc21	0.72221	5.31E-44	1.07E-41
Brf1			Ppm1l	Zdhhc17	0.72218	5.37E-44	1.09E-41
Brf2			Ppm1l	Zdhhc21	0.72218	5.39E-44	1.09E-41
Bri3			Adss	Zdhhc21	0.72211	5.52E-44	1.12E-41
Bri3bp			Trappc9	Zdhhc3	0.72209	5.57E-44	1.12E-41
Brinp1			Adgrl1	Zdhhc17	0.72207	5.63E-44	1.14E-41
Brinp2			Nt5dc3	Zdhhc17	0.72201	5.77E-44	1.16E-41
Brinp3			Srgap3	Zdhhc21	0.72198	5.83E-44	1.18E-41
Bach1,Brip1			Prkar1b	Golga7b	0.72191	5.99E-44	1.21E-41
Brix1			Oxr1	Zdhhc5	0.72191	6.00E-44	1.21E-41
Brk1			Bsn	Golga7b	0.72189	6.03E-44	1.21E-41
Brms1			Tvp23a	Zdhhc21	0.72182	6.20E-44	1.25E-41
Brms1l			D15Ertd621e	Zdhhc21	0.72181	6.24E-44	1.26E-41
Brox			Zmiz2	Zdhhc21	0.72179	6.28E-44	1.26E-41
Brpf1			Bptf	Zdhhc20	0.72175	0	0
Brpf3			Aes	Zdhhc3	0.72174	6.41E-44	1.29E-41
Brs3			Arrb1	Zdhhc21	0.72173	6.45E-44	1.30E-41
Brsk1			Dpp9	Zdhhc8	0.72164	6.66E-44	1.34E-41
Brsk2			Stxbp1	Zdhhc8	0.72158	6.84E-44	1.38E-41
Brwd1			Uhrf1bp1l	Zdhhc17	0.72137	7.42E-44	1.49E-41
Brwd3			Bsn	Zdhhc3	0.72135	7.48E-44	1.50E-41
Bscl2			Pip5k1c	Zdhhc21	0.72126	7.75E-44	1.56E-41
Bsdc1			Tbc1d13	Zdhhc21	0.72124	7.81E-44	1.57E-41
Bsg			Klc1	Zdhhc17	0.72114	8.13E-44	1.63E-41
Bsn			Tcf25	Golga7b	0.72092	8.86E-44	1.78E-41
Bsnd			Tom1l2	Zdhhc3	0.72089	8.98E-44	1.80E-41
Bsph1			Rusc2	Zdhhc21	0.72089	8.98E-44	1.80E-41
Bspry			Dnajc16	Zdhhc17	0.72084	9.15E-44	1.83E-41
Bst1			Prkar1b	Zdhhc21	0.72081	9.27E-44	1.86E-41
Bst2			Ric3	Zdhhc5	0.72079	9.33E-44	1.87E-41
Bsx			Dusp3	Zdhhc21	0.72079	9.34E-44	1.87E-41
Btbd1			Dnm3	Zdhhc17	0.72068	9.76E-44	1.96E-41
Btbd3			Ankrd13b	Zdhhc8	0.72066	9.85E-44	1.97E-41
Btbd6			Agfg1	Zdhhc21	0.72059	1.01E-43	2.03E-41
Btbd7			Brsk2	Golga7b	0.72052	1.04E-43	2.08E-41
Btbd8			Wdr13	Zdhhc8	0.72051	1.04E-43	2.09E-41
Btbd9			Map1a	Abhd17a	0.72047	0	0
Btbd10			Zfp827	Zdhhc21	0.72047	1.06E-43	2.12E-41
Btbd11			Atg9a	Zdhhc3	0.72045	1.07E-43	2.13E-41
Btbd16			Maea	Zdhhc17	0.72043	1.08E-43	2.16E-41
Btbd17			Wars	Zdhhc17	0.72041	1.09E-43	2.17E-41
Btbd18			Zmiz2	Zdhhc3	0.72034	1.11E-43	2.23E-41
Btc			Ythdf1	Zdhhc21	0.72031	1.13E-43	2.26E-41
Btd			Exoc3	Zdhhc21	0.72030	1.13E-43	2.26E-41
Btf3			Camta2	Golga7b	0.72021	1.17E-43	2.34E-41
Btf3l4			Tardbp	Zdhhc21	0.72020	1.18E-43	2.36E-41
Btg1			Foxj3	Zdhhc21	0.72018	1.19E-43	2.37E-41
Btg2			Mtor	Zdhhc3	0.72016	1.20E-43	2.39E-41
Btg3			Slc45a4	Zdhhc21	0.72001	1.27E-43	2.53E-41
Btg4			Caprin1	Zdhhc21	0.71998	1.29E-43	2.57E-41
Btk			Cep120	Zdhhc21	0.71981	1.38E-43	2.75E-41
Btla			Slc6a15	Zdhhc17	0.71979	1.39E-43	2.77E-41
Btn1a1			Rnf11	Zdhhc17	0.71972	1.43E-43	2.84E-41
Btn2a2			Fmr1	Zdhhc8	0.71968	1.45E-43	2.88E-41
Btnl2			Fam117b	Zdhhc21	0.71958	1.51E-43	3.00E-41
Btnl9			Spryd7	Zdhhc17	0.71955	1.52E-43	3.03E-41
Btnl10			BC005537	Zdhhc8	0.71953	1.54E-43	3.06E-41
Btrc			Dennd4a	Zdhhc17	0.71951	1.55E-43	3.08E-41
Bub1			Fbxo42	Zdhhc21	0.71950	1.55E-43	3.08E-41
Bub1b			Copg2	Zdhhc21	0.71943	1.60E-43	3.17E-41
Bub3			Fam134a	Zdhhc17	0.71941	1.61E-43	3.20E-41
Bud13			Rb1cc1	Zdhhc3	0.71928	1.69E-43	3.37E-41
Bud23			Dck	Zdhhc21	0.71925	1.72E-43	3.41E-41
Bud31			Cntn2	Zdhhc17	0.71910	1.82E-43	3.61E-41
Bysl			Cdc34	Zdhhc17	0.71904	1.86E-43	3.69E-41
Bzw1			Uspl1	Zdhhc17	0.71902	1.87E-43	3.72E-41
Bzw2			Rtn3	Golga7b	0.71901	1.89E-43	3.74E-41
C1d			Rundc3b	Zdhhc17	0.71898	1.90E-43	3.78E-41
C1galt1			Adrbk1	Golga7b	0.71896	1.93E-43	3.82E-41
C1galt1c1			Rnf157	Golga7b	0.71889	1.98E-43	3.91E-41
C1qa			Eif4g1	Zdhhc17	0.71888	1.99E-43	3.93E-41
C1qb			Syp	Zdhhc5	0.71888	1.99E-43	3.93E-41
C1qbp			Rbfox2	Zdhhc21	0.71887	1.99E-43	3.95E-41
C1qc			Glg1	Zdhhc8	0.71885	2.00E-43	3.97E-41
C1ql1			Hmbox1	Zdhhc21	0.71881	2.04E-43	4.04E-41
C1ql2			Dnm1	Golga7b	0.71875	2.09E-43	4.13E-41
C1ql3			Lrig2	Zdhhc21	0.71873	2.11E-43	4.16E-41
C1ql4			Cd99l2	Zdhhc8	0.71870	2.12E-43	4.20E-41
C1qtnf1			Ddi2	Zdhhc8	0.71864	2.18E-43	4.31E-41
C1qtnf2			Csnk1g2	Zdhhc8	0.71862	2.20E-43	4.34E-41
C1qtnf3			Ralgapb	Zdhhc3	0.71859	2.22E-43	4.38E-41
C1qtnf4			Dlat	Zdhhc21	0.71858	2.23E-43	4.40E-41
C1qtnf6			Mia3	Zdhhc21	0.71854	2.27E-43	4.48E-41
C1qtnf7			Rap2a	Zdhhc8	0.71850	2.30E-43	4.54E-41
C1qtnf9			5730409E04Rik	Zdhhc3	0.71850	2.31E-43	4.55E-41
C1qtnf12			Cdk14	Zdhhc21	0.71845	2.35E-43	4.62E-41
C1ra			Pbx2	Zdhhc17	0.71843	2.37E-43	4.67E-41
C1rl			Diras1	Zdhhc21	0.71838	2.41E-43	4.75E-41
C2			Nsf	Golga7b	0.71834	2.46E-43	4.84E-41
C2cd2			Efr3b	Zdhhc17	0.71831	2.48E-43	4.88E-41
C2cd2l			Rc3h2	Zdhhc8	0.71813	2.66E-43	5.23E-41
C2cd3			Pip5k1c	Zdhhc3	0.71811	2.68E-43	5.28E-41
C2cd4c			Tmod2	Zdhhc3	0.71809	2.71E-43	5.33E-41
C2cd4d			Atp6v1h	Zdhhc17	0.71808	2.71E-43	5.34E-41
C2cd5			Pnma2	Zdhhc8	0.71806	2.73E-43	5.37E-41
C3			Ackr1	Golga7b	0.71804	2.76E-43	5.43E-41
C3ar1			Mycbp2	Golga7b	0.71804	2.76E-43	5.43E-41
C4b			Megf8	Zdhhc3	0.71799	2.82E-43	5.54E-41
C4bp			Gga3	Zdhhc21	0.71792	2.89E-43	5.68E-41
C5ar1			Eif4b	Zdhhc21	0.71790	2.91E-43	5.72E-41
C5ar2			Ube2m	Zdhhc3	0.71788	2.93E-43	5.75E-41
C8a			Wbp2	Zdhhc21	0.71774	3.10E-43	6.08E-41
C8b			Pcnxl2	Golga7b	0.71774	3.10E-43	6.09E-41
C8g			Sos1	Zdhhc17	0.71772	3.12E-43	6.12E-41
Caap1			9330182L06Rik	Zdhhc17	0.71768	3.18E-43	6.23E-41
Cab39			Tanc2	Zdhhc17	0.71765	3.21E-43	6.29E-41
Cab39l			Hira	Zdhhc17	0.71764	3.22E-43	6.31E-41
Cabcoco1			Cacna1a	Golga7b	0.71754	3.35E-43	6.56E-41
Cables1			Mob4	Zdhhc17	0.71753	3.37E-43	6.59E-41
Cables2			Ap3s2	Zdhhc21	0.71748	3.43E-43	6.73E-41
Cabp1			Ppp1r9b	Zdhhc17	0.71744	3.48E-43	6.81E-41
Cabp2			Slc39a9	Zdhhc21	0.71742	3.51E-43	6.87E-41
Cabp4			Gpat4	Zdhhc3	0.71742	3.51E-43	6.87E-41
Cabp5			Stxbp5	Golga7b	0.71740	3.54E-43	6.93E-41
Cabp7			Ago2	Zdhhc17	0.71737	3.58E-43	7.00E-41
Cabs1			Pafah1b1	Zdhhc3	0.71736	3.60E-43	7.03E-41
Cabyr			Ap3s2	Zdhhc17	0.71734	3.62E-43	7.07E-41
Cacfd1			2610002M06Rik	Zdhhc17	0.71733	3.64E-43	7.11E-41
Cachd1			Fbxo33	Zdhhc17	0.71728	3.71E-43	7.25E-41
Cacna1a			Dock3	Zdhhc17	0.71726	3.73E-43	7.29E-41
Cacna1b			Dynlt3	Zdhhc2	0.71722	3.80E-43	7.42E-41
Cacna1c			Ttc39b	Zdhhc5	0.71720	3.83E-43	7.47E-41
Cacna1d			Ttll11	Zdhhc17	0.71707	4.03E-43	7.86E-41
Cacna1e			Herc1	Zdhhc3	0.71701	4.12E-43	8.04E-41
Cacna1f			Crls1	Zdhhc21	0.71693	4.26E-43	8.30E-41
Cacna1h			Pdp1	Zdhhc21	0.71692	4.26E-43	8.31E-41
Cacna1s			Kif3b	Zdhhc3	0.71687	4.35E-43	8.47E-41
Cacna2d1			Cdip1	Zdhhc17	0.71687	4.36E-43	8.49E-41
Cacna2d2			Dpysl2	Zdhhc21	0.71677	4.53E-43	8.83E-41
Cacna2d3			Foxk2	Zdhhc17	0.71674	4.59E-43	8.93E-41
Cacna2d4			Amph	Zdhhc17	0.71673	4.60E-43	8.96E-41
Cacnb1			Vamp1	Zdhhc17	0.71672	4.61E-43	8.97E-41
Cacnb2			Slc25a51	Zdhhc8	0.71671	4.64E-43	9.02E-41
Cacnb3			Glg1	Zdhhc17	0.71669	4.67E-43	9.08E-41
Cacnb4			Dmtn	Zdhhc8	0.71666	4.72E-43	9.18E-41
Cacng1			Mprip	Zdhhc8	0.71662	4.79E-43	9.32E-41
Cacng2			Ltn1	Zdhhc21	0.71660	4.83E-43	9.39E-41
Cacng3			Vps4a	Zdhhc3	0.71659	4.84E-43	9.41E-41
Cacng4			Map2k4	Golga7b	0.71656	4.92E-43	9.55E-41
Cacng5			Arfgef1	Zdhhc3	0.71645	5.13E-43	9.95E-41
Cacng6			Trim37	Golga7b	0.71643	5.16E-43	1.00E-40
Cacng7			Ipo9	Zdhhc21	0.71641	5.21E-43	1.01E-40
Cacng8			Atp6ap1	Zdhhc5	0.71636	5.30E-43	1.03E-40
Cactin			5730409E04Rik	Zdhhc21	0.71623	5.59E-43	1.08E-40
Cacul1			Tango2	Zdhhc21	0.71623	5.59E-43	1.08E-40
Cacybp			Cyp4x1	Zdhhc21	0.71620	5.64E-43	1.09E-40
Cad			Rragc	Zdhhc17	0.71616	5.73E-43	1.11E-40
Cadm1			Rabep1	Zdhhc3	0.71616	5.73E-43	1.11E-40
Cadm2			Ykt6	Zdhhc8	0.71607	5.93E-43	1.15E-40
Cadm3			Pcnxl2	Zdhhc21	0.71607	5.95E-43	1.15E-40
Cadm4			Wipi2	Zdhhc8	0.71603	6.03E-43	1.17E-40
Cadps			Nars	Zdhhc17	0.71602	6.05E-43	1.17E-40
Cage1			Dopey2	Zdhhc17	0.71599	6.12E-43	1.18E-40
Calb1			Sbf1	Zdhhc17	0.71595	6.22E-43	1.20E-40
Calb2			Cul2	Zdhhc17	0.71587	6.43E-43	1.24E-40
Calca			Tbc1d10b	Zdhhc8	0.71576	6.70E-43	1.30E-40
Calca			Eef1a2	Zdhhc21	0.71570	6.85E-43	1.32E-40
Calcb			Cdc42bpb	Zdhhc21	0.71569	6.87E-43	1.33E-40
Calcoco1			Cbl	Zdhhc21	0.71569	6.87E-43	1.33E-40
Calcoco2			Osbp	Zdhhc21	0.71564	7.00E-43	1.35E-40
Calcr			Mtpn	Zdhhc8	0.71562	7.06E-43	1.36E-40
Calcrl			Cpeb4	Zdhhc8	0.71560	7.13E-43	1.38E-40
Calhm2			5730409E04Rik	Golga7b	0.71559	7.14E-43	1.38E-40
Calhm3			Ppp1r12c	Zdhhc21	0.71559	7.15E-43	1.38E-40
Calhm5			Gm15800	Zdhhc8	0.71559	7.16E-43	1.38E-40
Calhm6			Syngr1	Zdhhc21	0.71550	7.41E-43	1.43E-40
Calm1			Ergic1	Zdhhc17	0.71548	7.45E-43	1.44E-40
Calm2			Impact	Zdhhc20	0.71547	7.50E-43	1.44E-40
Calm3			Srgap3	Zdhhc17	0.71544	7.57E-43	1.46E-40
Calm4			Cyfip2	Golga7b	0.71542	7.64E-43	1.47E-40
Calml3			Caskin1	Zdhhc17	0.71535	7.85E-43	1.51E-40
Calml4			Nicn1	Zdhhc21	0.71527	8.08E-43	1.55E-40
Caln1			Cadm3	Golga7b	0.71526	8.14E-43	1.57E-40
Calr			Kctd9	Zdhhc21	0.71524	8.20E-43	1.58E-40
Calr3			Arhgef18	Zdhhc17	0.71523	8.22E-43	1.58E-40
Calu			Disp2	Zdhhc21	0.71522	8.24E-43	1.58E-40
Caly			Cpeb1	Zdhhc8	0.71520	8.33E-43	1.60E-40
Camk1			Psme3	Zdhhc8	0.71519	8.35E-43	1.60E-40
Camk1d			Epg5	Zdhhc17	0.71518	8.39E-43	1.61E-40
Camk1g			Pip5k1c	Zdhhc17	0.71517	8.41E-43	1.61E-40
Camk2a			Irgq	Zdhhc3	0.71513	8.54E-43	1.64E-40
Camk2b,Camk2d			Klc1	Lypla2	0.71512	8.57E-43	1.64E-40
Camk2d			B4galt6	Zdhhc17	0.71512	8.59E-43	1.65E-40
Camk2g			Kif21a	Zdhhc2	0.71512	8.59E-43	1.65E-40
Camk2n1			Atp6v0a1	Zdhhc5	0.71497	9.08E-43	1.74E-40
Camk2n2			Ireb2	Zdhhc21	0.71487	9.43E-43	1.81E-40
Camk4			Sugp2	Zdhhc17	0.71485	9.53E-43	1.83E-40
Camkk1			Scamp5	Zdhhc5	0.71484	9.54E-43	1.83E-40
Camkk2			Atp6v1a	Golga7b	0.71463	1.04E-42	1.99E-40
Camkmt			Pcnxl2	Zdhhc3	0.71459	1.05E-42	2.02E-40
Camkv			Htt	Zdhhc21	0.71455	1.07E-42	2.05E-40
Caml			Svop	Golga7b	0.71452	1.08E-42	2.07E-40
Camp			Necap1	Zdhhc21	0.71451	1.09E-42	2.08E-40
Camsap1			Ddx19b	Zdhhc21	0.71445	1.11E-42	2.13E-40
Camsap2			Rap1gds1	Zdhhc8	0.71440	1.13E-42	2.16E-40
Camsap3			Wdfy3	Zdhhc8	0.71439	1.14E-42	2.17E-40
Camta1			Usp31	Zdhhc3	0.71438	1.14E-42	2.18E-40
Camta2			Ywhab	Zdhhc8	0.71435	1.15E-42	2.20E-40
Cand1			Dnm1l	Zdhhc3	0.71433	1.16E-42	2.22E-40
Cand2			Eef1a2	Zdhhc17	0.71426	1.19E-42	2.28E-40
Cant1			Gdap1	Golga7b	0.71426	1.20E-42	2.28E-40
Canx			Cbfa2t2	Zdhhc17	0.71420	1.22E-42	2.33E-40
Cap1			Slc25a51	Zdhhc17	0.71419	1.23E-42	2.34E-40
Cap2			Ubr4	Zdhhc3	0.71417	1.24E-42	2.36E-40
Capg			Maea	Zdhhc21	0.71412	1.26E-42	2.40E-40
Capn1			Akt3	Zdhhc17	0.71409	1.28E-42	2.43E-40
Capn2			Slc24a2	Zdhhc17	0.71404	1.30E-42	2.48E-40
Capn3			Adam22	Golga7b	0.71403	1.31E-42	2.49E-40
Capn5			Tmem57	Zdhhc17	0.71400	1.32E-42	2.52E-40
Capn6			Atp9a	Zdhhc3	0.71397	1.34E-42	2.55E-40
Capn7			Gnao1	Zdhhc17	0.71395	1.35E-42	2.56E-40
Capn9			Adss	Zdhhc3	0.71393	1.35E-42	2.58E-40
Capn10			Trnp1	Zdhhc3	0.71392	1.36E-42	2.59E-40
Capn11			Atg9a	Golga7b	0.71388	1.39E-42	2.63E-40
Capn12			Gltscr1l	Zdhhc8	0.71385	1.40E-42	2.66E-40
Capn13			Creld1	Zdhhc21	0.71379	1.43E-42	2.72E-40
Capn15			Mtmr3	Zdhhc17	0.71377	1.44E-42	2.74E-40
Capns1			Kifap3	Zdhhc21	0.71371	1.48E-42	2.80E-40
Capns2			Mapk9	Zdhhc3	0.71370	1.48E-42	2.82E-40
Caprin1			Lrfn1	Golga7b	0.71369	1.49E-42	2.83E-40
Caprin2			Tmem248	Zdhhc8	0.71366	1.50E-42	2.85E-40
Caps2			Srxn1	Zdhhc21	0.71365	1.51E-42	2.87E-40
Cadps2,Caps2			Kpna6	Zdhhc8	0.71360	1.54E-42	2.92E-40
Capsl			Plekha6	Zdhhc17	0.71359	1.55E-42	2.93E-40
Capza1			Tmem189	Zdhhc9	0.71358	1.55E-42	2.95E-40
Capza2			Hspa12a	Zdhhc21	0.71346	1.63E-42	3.08E-40
Capza3			Spin1	Zdhhc17	0.71343	1.64E-42	3.11E-40
Capzb			Cplx1	Zdhhc21	0.71339	1.67E-42	3.16E-40
Car1			Ikbkg	Zdhhc21	0.71330	1.73E-42	3.27E-40
Car2			Rnmt	Zdhhc17	0.71327	1.75E-42	3.30E-40
Car3			Agtpbp1	Zdhhc3	0.71321	1.79E-42	3.39E-40
Car4			Pcyox1	Zdhhc21	0.71315	1.83E-42	3.47E-40
Car5a			Tbc1d9b	Zdhhc21	0.71310	1.86E-42	3.53E-40
Car5b			Huwe1	Zdhhc17	0.71306	1.90E-42	3.58E-40
Car6			Mapk10	Zdhhc3	0.71305	1.90E-42	3.59E-40
Car7			Nub1	Zdhhc17	0.71299	1.94E-42	3.67E-40
Car8			Ythdf1	Zdhhc17	0.71298	1.95E-42	3.69E-40
Car9			Nceh1	Zdhhc21	0.71296	1.97E-42	3.71E-40
Car10			Ypel5	Zdhhc17	0.71293	1.99E-42	3.75E-40
Car11			Actr1a	Zdhhc21	0.71292	2.00E-42	3.77E-40
Car12			Prkar1a	Zdhhc17	0.71292	2.00E-42	3.78E-40
Car13			Fbxo41	Zdhhc17	0.71289	2.02E-42	3.81E-40
Car14			1110008P14Rik	Golga7b	0.71279	2.10E-42	3.96E-40
Car15			Enpp5	Zdhhc5	0.71279	2.10E-42	3.97E-40
Card9			Ttl	Zdhhc21	0.71278	2.11E-42	3.98E-40
Card10			Cpsf7	Zdhhc21	0.71264	2.23E-42	4.19E-40
Card11			Ppm1a	Zdhhc3	0.71264	2.23E-42	4.19E-40
Card14			Psme3	Zdhhc17	0.71262	2.24E-42	4.22E-40
Card19			Dnm3	Zdhhc21	0.71262	2.25E-42	4.23E-40
Carf			Rab3gap2	Zdhhc8	0.71260	2.26E-42	4.25E-40
Carhsp1			Ube2q1	Zdhhc8	0.71252	2.33E-42	4.38E-40
Carm1			Ghitm	Zdhhc3	0.71250	2.35E-42	4.41E-40
Carmil1			Mef2d	Zdhhc17	0.71248	2.36E-42	4.45E-40
Carmil2			Syp	Zdhhc21	0.71247	2.37E-42	4.46E-40
Carmil3			Tango2	Golga7b	0.71243	2.41E-42	4.53E-40
Carnmt1			Mib1	Zdhhc8	0.71230	2.53E-42	4.75E-40
Carns1			Ago2	Zdhhc8	0.71214	2.69E-42	5.06E-40
Cars			Ttpal	Zdhhc17	0.71213	2.71E-42	5.08E-40
Cars2			Pclo	Golga7b	0.71210	2.73E-42	5.13E-40
Cartpt			Ap1g1	Zdhhc8	0.71209	2.74E-42	5.15E-40
Casc1			Snx10	Zdhhc8	0.71209	2.75E-42	5.16E-40
Casc3			Got1	Zdhhc17	0.71204	2.79E-42	5.24E-40
Casd1			Rfwd2	Zdhhc8	0.71202	2.81E-42	5.28E-40
Cask			Ndrg4	Zdhhc21	0.71201	2.83E-42	5.30E-40
Caskin1			Syt4	Zdhhc17	0.71198	2.87E-42	5.37E-40
Caskin2			Hacd3	Zdhhc17	0.71195	2.89E-42	5.42E-40
Casp1			Ppp2r2d	Zdhhc3	0.71191	2.94E-42	5.50E-40
Casp2			Ap2b1	Zdhhc5	0.71189	2.97E-42	5.55E-40
Casp3			Nfe2l1	Zdhhc3	0.71187	2.98E-42	5.59E-40
Casp4			Dnaja3	Zdhhc21	0.71180	3.07E-42	5.74E-40
Casp6			Cadps	Golga7b	0.71179	3.07E-42	5.75E-40
Casp7			Sh3bp5l	Zdhhc17	0.71179	3.08E-42	5.75E-40
Casp8			Eef1a2	Golga7b	0.71177	3.10E-42	5.79E-40
Casp8ap2			Vps4a	Zdhhc17	0.71172	3.16E-42	5.90E-40
Casp9			1810013L24Rik	Zdhhc21	0.71162	3.29E-42	6.14E-40
Casp12			Tmem259	Zdhhc21	0.71151	3.42E-42	6.40E-40
Casp14			Napb	Zdhhc3	0.71148	3.46E-42	6.47E-40
Casq1			Kat7	Zdhhc21	0.71130	3.71E-42	6.93E-40
Casq2			Ddx19b	Zdhhc17	0.71125	3.78E-42	7.05E-40
Casr			Gnl3l	Zdhhc20	0.71121	3.84E-42	7.17E-40
Cass4			Rad23b	Zdhhc17	0.71119	3.86E-42	7.21E-40
Cast			Clcn3	Zdhhc21	0.71114	3.94E-42	7.35E-40
Castor1			Amigo1	Zdhhc17	0.71112	3.97E-42	7.40E-40
Castor2			Rnf14	Zdhhc3	0.71112	3.97E-42	7.40E-40
Casz1			Cry2	Zdhhc17	0.71109	4.02E-42	7.48E-40
Cat			Cbx6	Golga7b	0.71108	4.03E-42	7.50E-40
Catip			Tom1l2	Zdhhc8	0.71099	4.17E-42	7.76E-40
Catsper2			Cpeb1	Zdhhc17	0.71098	4.19E-42	7.81E-40
Catsper3			Kif5a	Golga7b	0.71097	4.21E-42	7.83E-40
Catsper4			Otub1	Golga7b	0.71093	4.26E-42	7.93E-40
Catsperd			Fam169a	Zdhhc17	0.71090	4.31E-42	8.03E-40
Catspere1			Dnaja2	Zdhhc17	0.71088	4.34E-42	8.07E-40
Catspere2			Fbxw7	Zdhhc21	0.71087	4.36E-42	8.10E-40
Catsperg1			Dcp2	Zdhhc17	0.71083	4.44E-42	8.25E-40
Catsperg2			Slc25a25	Zdhhc17	0.71082	4.44E-42	8.25E-40
Catsperz			B4galt6	Zdhhc8	0.71082	4.44E-42	8.25E-40
Cav1			Trak2	Zdhhc17	0.71074	4.59E-42	8.52E-40
Cav2			Ina	Golga7b	0.71067	4.70E-42	8.73E-40
Cav3			AU040320	Zdhhc17	0.71066	4.73E-42	8.78E-40
Cavin1			Lrp3	Golga7b	0.71062	4.80E-42	8.91E-40
Cavin2			Tmem38a	Zdhhc17	0.71049	5.03E-42	9.34E-40
Cavin3			Fem1b	Zdhhc8	0.71048	5.05E-42	9.37E-40
Cavin4			Dnajc21	Zdhhc17	0.71047	5.09E-42	9.44E-40
Cbarp			Sema4f	Zdhhc21	0.71046	5.09E-42	9.44E-40
Cbfa2t2			Foxj3	Zdhhc8	0.71045	5.11E-42	9.47E-40
Cbfa2t3			Pip5k1c	Golga7b	0.71043	5.15E-42	9.54E-40
Cbfb			Clasp1	Zdhhc8	0.71038	5.25E-42	9.73E-40
Cbl			D5Ertd579e	Zdhhc17	0.71037	5.27E-42	9.76E-40
Cblb			Eif4g3	Zdhhc17	0.71034	5.34E-42	9.88E-40
Cblc			Tecpr2	Zdhhc17	0.71031	5.39E-42	9.97E-40
Cblif			Stam	Zdhhc21	0.71029	5.44E-42	1.01E-39
Cbll1			Kif1b	Zdhhc9	0.71029	5.44E-42	1.01E-39
Cbln1			Ppme1	Golga7b	0.71028	5.47E-42	1.01E-39
Cbln2			Got2	Zdhhc5	0.71026	5.51E-42	1.02E-39
Cbln3			Appbp2	Zdhhc17	0.71025	5.53E-42	1.02E-39
Cbln4			D17Wsu92e	Zdhhc5	0.71024	5.54E-42	1.02E-39
Cbr1			Micu3	Golga7b	0.71023	5.55E-42	1.03E-39
Cbr2			Nat8l	Zdhhc3	0.71022	5.58E-42	1.03E-39
Cbr3			Synj2bp	Zdhhc21	0.71021	5.60E-42	1.03E-39
Cbr4			Dmxl2	Golga7b	0.71020	5.62E-42	1.04E-39
Cbs			Sacs	Zdhhc8	0.71017	5.69E-42	1.05E-39
Cbwd1			Eno2	Golga7b	0.71011	5.82E-42	1.07E-39
Cbx1			Napb	Zdhhc5	0.71011	5.82E-42	1.07E-39
Cbx2			Usp34	Zdhhc17	0.71000	6.07E-42	1.12E-39
Cbx3			Fbxo31	Zdhhc8	0.70999	6.08E-42	1.12E-39
Cbx4			Gsk3a	Zdhhc8	0.70999	6.10E-42	1.12E-39
Cbx5			Fam134a	Zdhhc3	0.70995	6.18E-42	1.14E-39
Cbx6			Trpc4ap	Zdhhc17	0.70992	6.24E-42	1.15E-39
Cbx7			Dhdds	Zdhhc8	0.70984	6.44E-42	1.19E-39
Cbx8			Mapk9	Zdhhc8	0.70981	6.53E-42	1.20E-39
Cby1			Pcyox1	Zdhhc17	0.70981	6.53E-42	1.20E-39
Cby2			Sucla2	Zdhhc21	0.70970	6.79E-42	1.25E-39
Cby3			Ube2o	Golga7b	0.70966	6.91E-42	1.27E-39
Cc2d1a			Lhfpl4	Zdhhc8	0.70962	7.01E-42	1.29E-39
Cc2d1b			Acsl4	Zdhhc17	0.70959	7.08E-42	1.30E-39
Cc2d2a			Trip12	Zdhhc21	0.70955	7.19E-42	1.32E-39
Ccar1			Gapvd1	Zdhhc17	0.70953	7.25E-42	1.33E-39
Ccar2			Map4k3	Zdhhc17	0.70947	7.41E-42	1.36E-39
Ccbe1			Fbxo33	Zdhhc21	0.70946	7.44E-42	1.37E-39
Ccdc3			Rab5b	Zdhhc8	0.70945	7.47E-42	1.37E-39
Ccdc6			Maneal	Zdhhc3	0.70943	7.52E-42	1.38E-39
Ccdc8			Tmem25	Zdhhc3	0.70938	7.68E-42	1.41E-39
Ccdc9			Gars	Zdhhc3	0.70938	7.68E-42	1.41E-39
Ccdc9b			Ptdss1	Zdhhc21	0.70933	7.81E-42	1.43E-39
Ccdc12			Naa25	Zdhhc17	0.70932	7.85E-42	1.44E-39
Ccdc13			Map3k12	Golga7b	0.70928	7.96E-42	1.46E-39
Ccdc14			Prune2	Zdhhc17	0.70926	8.03E-42	1.47E-39
Ccdc15			Whsc1	Zdhhc8	0.70918	8.26E-42	1.51E-39
Ccdc17			Hsdl1	Zdhhc21	0.70917	8.31E-42	1.52E-39
Ccdc18			Marf1	Zdhhc5	0.70916	8.32E-42	1.52E-39
Ccdc25			Slc35e1	Zdhhc8	0.70911	8.50E-42	1.56E-39
Ccdc27			Exoc3	Zdhhc17	0.70903	8.75E-42	1.60E-39
Ccdc28b			Aff3	Zdhhc21	0.70900	8.84E-42	1.62E-39
Ccdc30			Rnf145	Zdhhc17	0.70892	9.11E-42	1.67E-39
Ccdc32			Rabl6	Zdhhc3	0.70891	9.14E-42	1.67E-39
Ccdc33			Zer1	Zdhhc20	0.70890	0	0
Ccdc34			Dmxl2	Zdhhc3	0.70885	9.38E-42	1.71E-39
Ccdc38			Mmgt1	Abhd17b	0.70882	9.45E-42	1.73E-39
Ccdc39			Mapre3	Zdhhc3	0.70878	9.61E-42	1.76E-39
Ccdc40			Miat	Golga7b	0.70878	9.61E-42	1.76E-39
Ccdc42			Gm15800	Zdhhc3	0.70877	9.66E-42	1.76E-39
Ccdc43			Dhx36	Zdhhc21	0.70872	9.84E-42	1.80E-39
Ccdc47			Rragc	Zdhhc8	0.70871	9.85E-42	1.80E-39
Ccdc50			Map1a	Zdhhc8	0.70870	9.90E-42	1.81E-39
Ccdc51			Mapk8ip2	Zdhhc8	0.70865	1.01E-41	1.84E-39
Ccdc57			Prpf18	Zdhhc21	0.70865	1.01E-41	1.84E-39
Ccdc58			Chn1	Golga7b	0.70849	1.07E-41	1.95E-39
Ccdc59			Mark1	Zdhhc17	0.70838	1.12E-41	2.03E-39
Ccdc60			Csnk1d	Zdhhc8	0.70838	1.12E-41	2.03E-39
Ccdc61			Pi4ka	Zdhhc21	0.70838	1.12E-41	2.03E-39
Ccdc62			Napg	Zdhhc8	0.70836	1.12E-41	2.05E-39
Ccdc63			Pacsin1	Golga7b	0.70833	1.14E-41	2.07E-39
Ccdc65			Eml2	Zdhhc21	0.70829	1.15E-41	2.10E-39
Ccdc66			Dctn5	Zdhhc17	0.70820	1.20E-41	2.18E-39
Ccdc68			Ipo9	Zdhhc5	0.70817	1.21E-41	2.20E-39
Ccdc69			Arfgef2	Zdhhc8	0.70815	1.22E-41	2.22E-39
Ccdc71			Neurl4	Zdhhc3	0.70810	1.24E-41	2.26E-39
Ccdc73			Rltpr	Zdhhc21	0.70805	1.27E-41	2.30E-39
Ccdc77			Dgcr2	Zdhhc17	0.70803	1.27E-41	2.31E-39
Ccdc78			Srpk2	Golga7b	0.70801	1.28E-41	2.33E-39
Ccdc80			Ap3d1	Zdhhc8	0.70798	1.30E-41	2.35E-39
Ccdc81			Pikfyve	Zdhhc17	0.70795	1.31E-41	2.38E-39
Ccdc82			Cntn1	Zdhhc17	0.70795	1.31E-41	2.38E-39
Ccdc83			Spred2	Zdhhc21	0.70795	1.31E-41	2.38E-39
Ccdc84			Ube2m	Zdhhc5	0.70792	1.33E-41	2.40E-39
Ccdc85a			Mapk10	Zdhhc8	0.70787	1.35E-41	2.46E-39
Ccdc85b			Cdc34	Zdhhc21	0.70783	1.37E-41	2.49E-39
Ccdc85c			Tmem87b	Zdhhc8	0.70783	1.37E-41	2.49E-39
Ccdc86			Map3k10	Zdhhc8	0.70781	1.38E-41	2.51E-39
Ccdc87			Senp2	Zdhhc8	0.70777	1.40E-41	2.54E-39
Ccdc88a			Arih1	Zdhhc3	0.70777	1.40E-41	2.54E-39
Ccdc88b			Jph3	Zdhhc17	0.70776	1.41E-41	2.56E-39
Ccdc88c			Adar	Zdhhc17	0.70774	1.42E-41	2.57E-39
Ccdc89			Ogfod1	Zdhhc21	0.70767	1.46E-41	2.64E-39
Ccdc90b			Smcr8	Zdhhc17	0.70754	1.53E-41	2.77E-39
Ccdc91			Wdr47	Zdhhc8	0.70754	1.53E-41	2.77E-39
Ccdc92			Sult4a1	Zdhhc8	0.70748	1.56E-41	2.83E-39
Ccdc93			Csde1	Zdhhc17	0.70748	1.56E-41	2.83E-39
Ccdc96			Ezh1	Zdhhc21	0.70748	1.57E-41	2.83E-39
Ccdc97			Dnajc27	Zdhhc5	0.70746	1.58E-41	2.85E-39
Ccdc102a			Pphln1	Zdhhc21	0.70742	1.60E-41	2.89E-39
Ccdc103			Neurl1a	Zdhhc8	0.70740	1.61E-41	2.91E-39
Ccdc105			Dctn5	Zdhhc21	0.70735	1.64E-41	2.97E-39
Ccdc106			Ankrd46	Zdhhc8	0.70728	1.69E-41	3.05E-39
Ccdc107			Hk1	Zdhhc8	0.70727	1.69E-41	3.05E-39
Ccdc110			Tigar	Zdhhc17	0.70725	1.70E-41	3.07E-39
Ccdc112			Wasl	Zdhhc8	0.70723	1.72E-41	3.09E-39
Ccdc113			Bap1	Zdhhc17	0.70722	1.72E-41	3.11E-39
Ccdc114			Syn1	Zdhhc8	0.70722	1.73E-41	3.11E-39
Ccdc115			Phlpp2	Zdhhc21	0.70715	1.77E-41	3.19E-39
Ccdc116			Tbck	Zdhhc8	0.70712	1.79E-41	3.22E-39
Ccdc117			Alg11	Zdhhc17	0.70708	1.82E-41	3.27E-39
Ccdc120			Stxbp5	Zdhhc21	0.70706	1.83E-41	3.30E-39
Ccdc122			Asxl1	Zdhhc21	0.70703	1.85E-41	3.34E-39
Ccdc124			Wsb2	Zdhhc3	0.70701	1.87E-41	3.36E-39
Ccdc125			Acbd5	Zdhhc21	0.70698	1.89E-41	3.39E-39
Ccdc126			Tmem8b	Zdhhc17	0.70695	1.91E-41	3.43E-39
Ccdc127			Agps	Zdhhc21	0.70695	1.91E-41	3.43E-39
Ccdc130			Lztr1	Zdhhc3	0.70695	1.91E-41	3.43E-39
Ccdc134			Syngr3	Zdhhc17	0.70694	1.91E-41	3.44E-39
Ccdc136			Kpna6	Zdhhc3	0.70694	1.91E-41	3.44E-39
Ccdc137			Spin1	Zdhhc8	0.70692	1.93E-41	3.46E-39
Ccdc138			Ywhag	Golga7b	0.70689	1.95E-41	3.50E-39
Ccdc142			Hdlbp	Zdhhc8	0.70688	1.96E-41	3.51E-39
Ccdc148			Rab3gap1	Zdhhc21	0.70684	1.99E-41	3.57E-39
Ccdc150			Ppp3r1	Zdhhc8	0.70682	2.00E-41	3.59E-39
Ccdc151			Rnmt	Zdhhc21	0.70682	2.00E-41	3.59E-39
Ccdc153			Synj1	Zdhhc5	0.70681	2.01E-41	3.60E-39
Ccdc154			Vdac1	Zdhhc17	0.70673	2.07E-41	3.71E-39
Ccdc157			Trim37	Zdhhc21	0.70670	2.09E-41	3.75E-39
Ccdc158			Rltpr	Golga7b	0.70667	2.11E-41	3.79E-39
Ccdc159			Akap11	Zdhhc3	0.70664	2.14E-41	3.83E-39
Ccdc160			Trim2	Zdhhc21	0.70661	2.16E-41	3.88E-39
Ccdc162			Cmip	Zdhhc8	0.70657	2.19E-41	3.93E-39
Ccdc167			Mfn2	Zdhhc3	0.70655	2.21E-41	3.96E-39
Ccdc169			Fkbp1b	Zdhhc21	0.70655	2.21E-41	3.96E-39
Ccdc171			Tigar	Zdhhc21	0.70654	2.23E-41	3.98E-39
Ccdc172			Unc80	Golga7b	0.70652	2.24E-41	4.00E-39
Ccdc173			Tmx4	Zdhhc20	0.70647	0	0
Ccdc174			Zbtb7a	Zdhhc5	0.70647	2.28E-41	4.08E-39
Ccdc177			Atxn7l3	Zdhhc8	0.70646	2.29E-41	4.10E-39
Ccdc178			Ttbk1	Zdhhc8	0.70640	2.34E-41	4.18E-39
Ccdc181			Gnptab	Zdhhc21	0.70639	2.35E-41	4.20E-39
Ccdc183			Exoc6b	Zdhhc21	0.70627	2.46E-41	4.40E-39
Ccdc184			Tex2	Zdhhc8	0.70623	2.49E-41	4.45E-39
Ccdc186			Csrnp3	Zdhhc17	0.70615	2.57E-41	4.59E-39
Ccdc187			Fam8a1	Zdhhc8	0.70615	2.57E-41	4.59E-39
Ccdc189			Sv2a	Zdhhc17	0.70613	2.59E-41	4.63E-39
Ccdc190			Lhfpl4	Zdhhc3	0.70612	2.60E-41	4.64E-39
Ccdc194			Nfasc	Zdhhc17	0.70607	2.64E-41	4.71E-39
ccdc198			Amigo1	Zdhhc21	0.70604	2.67E-41	4.76E-39
Ccer1			Csnk1g2	Zdhhc21	0.70602	2.69E-41	4.80E-39
Cchcr1			Mast2	Zdhhc21	0.70594	2.78E-41	4.95E-39
Ccin			Sfxn3	Zdhhc21	0.70594	2.78E-41	4.95E-39
Cck			Synj2bp	Zdhhc3	0.70591	2.81E-41	5.00E-39
Cckar			Wasl	Zdhhc3	0.70588	2.84E-41	5.07E-39
Cckbr			Kif1a	Zdhhc5	0.70587	2.85E-41	5.08E-39
Ccl2			Fam8a1	Zdhhc17	0.70585	2.88E-41	5.12E-39
Ccl3			Mroh1	Zdhhc17	0.70584	2.88E-41	5.13E-39
Ccl4			Prkab2	Zdhhc21	0.70584	2.89E-41	5.13E-39
Ccl5			Scn2b	Zdhhc21	0.70579	2.94E-41	5.22E-39
Ccl6			Zmiz2	Golga7b	0.70576	2.97E-41	5.28E-39
Ccl7			Depdc5	Zdhhc21	0.70576	2.97E-41	5.29E-39
Ccl8			Grsf1	Zdhhc17	0.70571	3.02E-41	5.37E-39
Ccl9			Mycbp2	Zdhhc21	0.70570	3.04E-41	5.40E-39
Ccl11			Ina	Zdhhc21	0.70568	3.06E-41	5.44E-39
Ccl12			Exoc2	Zdhhc21	0.70566	3.09E-41	5.48E-39
Ccl19			Flot2	Zdhhc8	0.70563	3.11E-41	5.53E-39
Ccl21b			B4galt5	Zdhhc3	0.70557	3.19E-41	5.66E-39
Abcd1,Ccl22			Fam126b	Zdhhc21	0.70554	3.22E-41	5.72E-39
Ccl24			D15Ertd621e	Zdhhc17	0.70553	3.23E-41	5.73E-39
Ccl25			Svop	Zdhhc17	0.70550	3.27E-41	5.79E-39
Ccl28			Wasf3	Zdhhc17	0.70548	3.29E-41	5.84E-39
Ccm2l			Golga2	Zdhhc3	0.70548	3.30E-41	5.84E-39
Ccn1			Clcn7	Zdhhc17	0.70547	3.30E-41	5.85E-39
Ccn2			Prkacb	Zdhhc20	0.70546	0	0
Ccn3			Scn1b	Golga7b	0.70541	3.39E-41	6.00E-39
Ccn4			Apc	Zdhhc17	0.70538	3.42E-41	6.06E-39
Ccn5			Fam155a	Zdhhc17	0.70536	3.44E-41	6.09E-39
Ccn6			Wdr47	Golga7b	0.70530	3.52E-41	6.24E-39
Ccna1			Slc36a1	Zdhhc8	0.70529	3.54E-41	6.26E-39
Ccna2			Cadm3	Zdhhc8	0.70525	3.58E-41	6.34E-39
Ccnb1			Kctd3	Zdhhc17	0.70518	3.68E-41	6.51E-39
Ccnb2			Ndrg3	Zdhhc17	0.70516	3.72E-41	6.57E-39
Ccnb3			BC030336	Zdhhc8	0.70513	3.76E-41	6.64E-39
Ccnc			Ap1ar	Zdhhc8	0.70512	3.76E-41	6.65E-39
Ccnd1			Samd10	Zdhhc21	0.70511	3.78E-41	6.68E-39
Ccnd2			Dgke	Zdhhc5	0.70506	3.85E-41	6.81E-39
Ccnd3			Ggnbp2	Zdhhc8	0.70503	3.90E-41	6.88E-39
Ccndbp1			Plekhm3	Zdhhc8	0.70501	3.93E-41	6.93E-39
Ccne1			Dcp2	Zdhhc3	0.70495	4.02E-41	7.09E-39
Ccne2			Rabep1	Zdhhc8	0.70489	4.10E-41	7.23E-39
Ccnf			Fxr2	Zdhhc3	0.70485	4.17E-41	7.35E-39
Ccng1			Nudt3	Zdhhc3	0.70475	4.31E-41	7.60E-39
Ccng2			Rab15	Golga7b	0.70459	4.57E-41	8.07E-39
Ccnh			Nisch	Zdhhc17	0.70456	4.63E-41	8.16E-39
Ccni			Gabrb3	Golga7b	0.70451	4.72E-41	8.31E-39
Ccnj			Aplp2	Zdhhc21	0.70444	4.85E-41	8.54E-39
Ccnjl			Hras	Zdhhc17	0.70439	4.93E-41	8.68E-39
Ccnk			L1cam	Zdhhc8	0.70438	4.95E-41	8.72E-39
Ccn1,Ccnl1			Trpc4ap	Zdhhc21	0.70433	5.03E-41	8.86E-39
Ccnl2			Scn8a	Zdhhc17	0.70432	5.06E-41	8.90E-39
Ccno			5730409E04Rik	Zdhhc8	0.70429	5.13E-41	9.02E-39
Ccnq			Rap1gap2	Zdhhc8	0.70423	5.23E-41	9.21E-39
Ccnt1			Dcun1d2	Zdhhc17	0.70415	5.39E-41	9.47E-39
Ccnt2			Csrp2bp	Zdhhc17	0.70414	5.42E-41	9.52E-39
Ccny			Fktn	Zdhhc8	0.70412	5.45E-41	9.57E-39
Ccp110			Nav1	Zdhhc17	0.70410	5.48E-41	9.63E-39
Ccpg1			Tsc1	Zdhhc21	0.70408	5.53E-41	9.72E-39
Ccr1			Panx2	Golga7b	0.70400	5.70E-41	1.00E-38
Ccr2			Zfp318	Zdhhc17	0.70399	5.71E-41	1.00E-38
Ccr5			Ube2z	Zdhhc3	0.70396	5.78E-41	1.02E-38
Ccr6			Arl8a	Zdhhc2	0.70395	5.79E-41	1.02E-38
Ccr7			Tuba4a	Golga7b	0.70395	5.80E-41	1.02E-38
Ccr8			Clstn1	Golga7b	0.70395	5.80E-41	1.02E-38
Ccr10			Tango2	Zdhhc3	0.70392	5.87E-41	1.03E-38
Ccrl2			Dusp3	Zdhhc9	0.70384	6.05E-41	1.06E-38
Ccs			Lrrc49	Zdhhc17	0.70382	6.09E-41	1.07E-38
Ccsap			Slc25a46	Zdhhc3	0.70380	6.14E-41	1.08E-38
Ccser1			Rbfox2	Golga7b	0.70378	6.18E-41	1.08E-38
Ccser2			Mark4	Zdhhc5	0.70368	6.40E-41	1.12E-38
Cct2			Unc13a	Zdhhc21	0.70363	6.52E-41	1.14E-38
Cct3			Cend1	Zdhhc3	0.70361	6.58E-41	1.15E-38
Cct4			Ipo9	Zdhhc17	0.70355	6.72E-41	1.18E-38
Cct5			Npepps	Zdhhc8	0.70352	6.80E-41	1.19E-38
Cct6a			Tmem178b	Zdhhc21	0.70348	6.89E-41	1.21E-38
Cct6b			Dusp3	Zdhhc17	0.70344	6.98E-41	1.22E-38
Cct7			Usp14	Zdhhc21	0.70344	7.00E-41	1.22E-38
Cct8			Mtor	Zdhhc8	0.70342	7.05E-41	1.23E-38
Ccz1			Nalcn	Zdhhc21	0.70341	7.09E-41	1.24E-38
Cd1d1			Tanc2	Zdhhc8	0.70339	7.13E-41	1.25E-38
Cd2			Mtmr7	Zdhhc17	0.70335	7.23E-41	1.26E-38
Cd2ap			Creld1	Zdhhc17	0.70335	7.23E-41	1.26E-38
Cd2bp2			Aars	Zdhhc3	0.70333	7.29E-41	1.27E-38
Cd3e			Appbp2	Zdhhc21	0.70328	7.41E-41	1.29E-38
Cd3eap			Apc2	Zdhhc17	0.70328	7.42E-41	1.29E-38
Cd4			Lrp12	Zdhhc17	0.70327	7.46E-41	1.30E-38
Cd5			Ywhab	Zdhhc3	0.70324	7.53E-41	1.31E-38
Cd5l			Kif5c	Zdhhc21	0.70321	7.63E-41	1.33E-38
[truncated: 13,533 more rows]
