# Supplementary material for: Exploring the expression patterns of palmitoylating and de-palmitoylating enzymes in the mouse brain using the curated RNA-seq database BrainPalmSeq
Source: eLife. 2022 Jul 12;11:e75804. doi: 10.7554/eLife.75804 (PMC9365392; doi:10.7554/eLife.75804)
Supplement: Figure 1—source data 6. [file elife-75804-fig1-data6.xlsx]

## Sheet: Sheet1
Figure 1F: Panther analysis of palmitoylation substrates (SwissPalm annotated) co-expressed with any Zdhhc (R > 0.7)
GO Biological Process (Panther)	-logFDR
establishment of localization	39.4473
transport	37.5767
localization	37.5243
cellular localization	36.1772
establishment of localization in cell	29.7645
macromolecule localization	24.7055
ion transport	23.9172
anion transport	22.4815
intracellular transport	22.4437
organelle localization	22.3279
organic substance transport	22.091
protein localization	21.9469
nitrogen compound transport	21.9355
establishment of protein localization	21.6798
vesicle-mediated transport	21.5143
