# Supplementary material for: Exploring the expression patterns of palmitoylating and de-palmitoylating enzymes in the mouse brain using the curated RNA-seq database BrainPalmSeq
Source: eLife. 2022 Jul 12;11:e75804. doi: 10.7554/eLife.75804 (PMC9365392; doi:10.7554/eLife.75804)
Supplement: Figure 2—figure supplement 1—source data 1. [file elife-75804-fig2-figsupp1-data1.xlsx]

## Sheet: Sheet1
Figure 2 - Figure supplement 1 - Source data 1 (Figure 2 - Figure supplement 1A). Expression of Zdhhcs in hippocampal excitatroy neurons across studies.
Hipposeq						DropViz					Allen Brain 10Xgenomics mouse
	Dorsal DG GC	Dorsal CA3	Dorsal CA2	Dorsal CA1			DG	CA2/CA3	CA1			DG	CA3	CA2	CA1
Zdhhc1	0.998536	0.274126	0.447778	0.561849		Zdhhc1	0.693147	0.693147	0.693147		Zdhhc1	0.181394	0.465593	0.799394	0.398211
Zdhhc2	0.836883	1.24676	1.40551	1.96953		Zdhhc2	1.38629	1.60944	2.77259		Zdhhc2	0.702891	0.800306	0	4.77381
Zdhhc3	0.937681	1.1762	1.25271	1.21448		Zdhhc3	2.19722	2.3979	2.48491		Zdhhc3	0.143946	2.13561	1.45768	1.70383
Zdhhc4	1.48014	0.762879	0.732896	1.01517		Zdhhc4	1.09861	0.693147	0.693147		Zdhhc4	0	0.354511	0	0.0469697
Zdhhc5	1.04587	1.26395	1.33528	1.26266		Zdhhc5	1.09861	1.38629	1.38629		Zdhhc5	0	0.406485	0	0.212284
Zdhhc6	1.03474	1.01841	1.02977	0.834514		Zdhhc6	0.693147	0.693147	0.693147		Zdhhc6	0.260345	1.55233	0.593333	1.33404
Zdhhc7	1.4225	0.962819	0.986806	0.905156		Zdhhc7	1.09861	1.38629	1.38629		Zdhhc7	0	0.684104	0	0.157717
Zdhhc8	1.4415	0.995267	1.01804	0.94892		Zdhhc8	1.94591	1.94591	1.94591		Zdhhc8	0.176385	1.43222	1.60909	0.536325
Zdhhc9	1.24647	1.47538	1.54907	1.30658		Zdhhc9	0.693147	1.09861	1.09861		Zdhhc9	0	0.573682	0	0.1775
Zdhhc11	0	0	0.005052	0		Zdhhc11					Zdhhc11	0	0	0	0
Zdhhc12	0.320499	0.381126	0.440986	0.411976		Zdhhc12	0.693147	0.693147	0.693147		Zdhhc12	0	0	0	0
Zdhhc13	0.980407	1.24061	1.18191	1.07179		Zdhhc13	1.09861	1.38629	1.09861		Zdhhc13	0	1.01407	0	0.344835
Zdhhc14	1.10278	1.27869	0.864691	1.25953		Zdhhc14	1.38629	1.94591	1.79176		Zdhhc14	1.39292	5.61664	1.00616	6.42698
Zdhhc15	0.836563	0.520341	0.704296	0.543113		Zdhhc15	0.693147	0.693147	0.693147		Zdhhc15	0	0.253424	0	0.0143421
Zdhhc16	0.428185	0.518891	0.456797	0.577057		Zdhhc16	1.09861	1.09861	1.38629		Zdhhc16	0	0.251401	0	0.00279167
Zdhhc17	1.12244	1.66432	1.57484	1.52113		Zdhhc17	1.94591	2.19722	2.19722		Zdhhc17	0.947773	5.539	2.0849	4.00589
Zdhhc18	1.12884	0.915033	0.653215	0.748062		Zdhhc18	1.09861	1.38629	1.38629		Zdhhc18	0.14821	0.459517	0	0.306154
Zdhhc19	0	0	0	0		Zdhhc19					Zdhhc19	0	0	0	0
Zdhhc20	0.903162	1.36057	1.29318	1.19246		Zdhhc20	2.07944	2.48491	2.56495		Zdhhc20	2.28723	5.69757	2.5515	5.65552
Zdhhc21	1.51515	1.31197	1.32591	1.30312		Zdhhc21	2.30259	2.19722	2.07944		Zdhhc21	1.74491	4.20346	2.1996	2.84271
Zdhhc22	0.378469	0.164172	0.179272	0		Zdhhc22	0	0	0		Zdhhc22	0	0	0	0
Zdhhc23	0.828605	1.09864	1.64048	1.32602		Zdhhc23	0	0.693147	1.09861		Zdhhc23	0	3.70069	2.09626	1.74635
Zdhhc24	1.45079	1.3777	1.40339	1.1728		Zdhhc24	0.693147	0.693147	1.09861		Zdhhc24	0	0.0988304	0	0
Zdhhc25	0	0	0	0		Zdhhc25					Zdhhc25	0	0	0	0
