# Supplementary material for: Exploring the expression patterns of palmitoylating and de-palmitoylating enzymes in the mouse brain using the curated RNA-seq database BrainPalmSeq
Source: eLife. 2022 Jul 12;11:e75804. doi: 10.7554/eLife.75804 (PMC9365392; doi:10.7554/eLife.75804)
Supplement: Figure 2—source data 1. [file elife-75804-fig2-data1.xlsx]

## Sheet: BPSmatrix_Cembrowski2016_HippDo
Figure 2 - Source data 1 (Figure 2A, B, C, G). Neuronal expression of Zdhhc genes in dorsal hippocampus (Units: logFKPM+1)
Source data: https://hipposeq.janelia.org/full/
Hippocampal region	Dorsal DG granule cell	Dorsal CA3	Dorsal CA2	Dorsal CA1
Zdhhc1	0.998536	0.274126	0.447778	0.561849
Zdhhc2	0.836883	1.24676	1.40551	1.96953
Zdhhc3	0.937681	1.1762	1.25271	1.21448
Zdhhc4	1.48014	0.762879	0.732896	1.01517
Zdhhc5	1.04587	1.26395	1.33528	1.26266
Zdhhc6	1.03474	1.0184	1.02977	0.834514
Zdhhc7	1.4225	0.962819	0.986806	0.905156
Zdhhc8	1.4415	0.995267	1.01804	0.94892
Zdhhc9	1.24647	1.47538	1.54907	1.30658
Zdhhc11	0	0	0.00505218	0
Zdhhc12	0.320499	0.381126	0.440986	0.411976
Zdhhc13	0.980407	1.24061	1.18191	1.07179
Zdhhc14	1.10278	1.27869	0.864691	1.25953
Zdhhc15	0.836563	0.520341	0.704296	0.543113
Zdhhc16	0.428185	0.518891	0.456797	0.577057
Zdhhc17	1.12244	1.66432	1.57484	1.52113
Zdhhc18	1.12884	0.915033	0.653215	0.748062
Zdhhc19	0	0	0	0
Zdhhc20	0.903162	1.36057	1.29318	1.19246
Zdhhc21	1.51515	1.31197	1.32591	1.30312
Zdhhc22	0.378469	0.164172	0.179272	0
Zdhhc23	0.828605	1.09864	1.64048	1.32602
Zdhhc24	1.45079	1.37771	1.40339	1.1728
Zdhhc25	0	0	0	0
