# Supplementary material for: Exploring the expression patterns of palmitoylating and de-palmitoylating enzymes in the mouse brain using the curated RNA-seq database BrainPalmSeq
Source: eLife. 2022 Jul 12;11:e75804. doi: 10.7554/eLife.75804 (PMC9365392; doi:10.7554/eLife.75804)
Supplement: Figure 2—source data 2. [file elife-75804-fig2-data2.xlsx]

## Sheet: CA1enriched genes
Figure 2 - Source data 2 (Figure 2D,E,F) Dorsal CA1 (dCA1) enriched projected palmitoylome
		162 genes		145 genes		42 genes
Hipposeq settings		dCA1 enriched		dCA1 enriched & UniProt reviewed		dCA1 enriched & UniProt reviewed & SwissPalm annotated		Enriched genes	145
Enriched Populations: ca1_d		Wfs1		Htr1a		Htr1a		SP annotated	42
Depleted Populations: ca2,ca3_d,dg_d		Mpped1		Adcy2		Adcy2		% found SP	28.9655
Fold threshold: 1.5		Fibcd1		Adcy8		Anln		% not found SP	71.0345
FPKMmin threshold: 5		Nov		Ssx2ip		Arf1
FDR: 0.05		2610017I09Rik		Ankrd33b		Arl15
Cell Lines: ca1_d,ca2,ca3_d,dg_d		Lphn2		Anln		Actr2
Replicates: No		Htr1a		Arf1		Actr3b
Normalised Expression: No		Kcnh7		Arfgap3		Bcr
		Anln		Arl15		Car2
		Ndst3		Arnt2		Cadps2
		Arhgap12		Actr2		Casp3
		Fnbp1l		Actr3b		Cacng8
		Plekhg1		Asap2		Cln5
		BC030500		Atxn1l		Ddx46
		Grem1		B3gat1		Fkbp1a
		Man1a		Bag5		Fzd3
		Pex5l		Bcr		Nr3c1
		Tyro3		Bex1		Git1
		Wnt2		Bhlhe40		Gria1
		Hs6st3		Arntl		Hcn1
		Odz3		Car2		Itpka
		Tmsb10		Cadps2		Itm2b
		Ccnd1		Casp3		Itpr1
		Cds1		Cacng8		Kcnab1
		Tmem158		Ccnd1		Kcnq3
		Klhl13		Cdk19		Prkcb
		Hs6st2		Cds1		Lphn2
		Zfp386		Chl1		Mtap4
		Kctd15		Cln5		Mpp6
		Ttc9		Cntn4		Grin2a
		Scn4b		Cpne8		Ntm
		Cntn4		Cttnbp2nl		Pde2a
		Adcy8		Dab2ip		Plcl2
		Asap2		Ccdc88c		Pnkd
		Enpp2		Dcun1d4		Ppp3ca
		Cacna1i		Ddx46		Rab8b
		Efnb2		Pole4		Sccpdh
		Kcnab3		Dusp6		Sept6
		Zdhhc2		Efnb2		Sstr4
		Ldb2		Enpp2		Trpc4
		Sorcs3		Etv1		Tspan13
		Casp3		Far2		Atp2b1
		Cadps2		Fibcd1
		Gm2115		Fnbp1l
		6030405A18Rik		Fkbp1a
		Thrb		Fzd3
		Zfp462		Gabra1
		Far2		Nr3c1
		Ccdc88c		Git1
		Pole4		Galnt13
		Sstr4		Galntl4
		Dab2ip		Grem1
		Prkcb		Gria1
		Rab8b		Hs6st2
		Car2		Hs6st3
		Arfgap3		Hcn1
		Sept6		Hexim1
		Ntm		Itpka
		Myo16		Itm2b
		Sbk1		Itpr1
		Scn3b		Kcnab1
		Pou3f3		Kcnab3
		Mal2		Kctd15
		Slc8a3		Kcnh7
		Dusp6		Kcnq3
		Arnt2		Kctd1
		Tbc1d1		Kdm3a
		Mylip		Khdrbs3
		Itpka		Klhl13
		Atp2b1		Kl
		Inpp5a		Prkcb
		Lypd1		Ldb2
		9430020K01Rik		Lix1l
		Prex1		Lmo3
		Kcnab1		Lphn2
		Serpini1		Lypd1
		Arntl		Man1a
		Cpne8		Mal2
		Bhlhe40		Mtap4
		Slc35f1		March1
		Nr4a1		Mpp6
		Syt16		Mpped1
		Gabra1		Mylip
		Nr3c1		Myo16
		Otud1		Ndst3
		Bcr		Serpini1
		Bex1		Grin2a
		4930429B21Rik		Nov
		Arl15		Nap1l5
		Trpc4		Nr4a1
		Bag5		Nrip1
		Plk2		Ntm
		Hcn1		Otud1
		Sccpdh		Prkrir
		St6gal2		Pde2a
		Rasd1		Pex5l
		Cacng8		Plcl2
		Mtap4		Plk2
		Kcnq3		Pnkd
		Heca		Pou3f3
		Thbd		Ppp3ca
		Galnt13		Ppp4r4
		Nap1l5		Prex1
		March1		Rab8b
		Etv1		Rasd1
		Ankrd33b		Rab27b
		1600021P15Rik		Arhgap12
		Lix1l		Rnf2
		Smurf1		Slc35f1
		Sez6		Sbk1
		Itpr1		Scn3b
		Chl1		Scn4b
		Kl		Sccpdh
		Cln5		Sept6
		Wwc2		Sept9
		Mpp6		Sez6
		Khdrbs3		St6gal2
		Kctd1		Smarcal1
		Sept9		Smurf1
		Pde2a		Snapc1
		Adcy2		Sorcs3
		Tfdp2		Spnb1
		Nrip1		Sstr4
		Smarcal1		Syt16
		Ppp4r4		Tbc1d1
		Rab27b		Odz3
		Cx3cl1		Tfdp2
		Prkrir		Thrb
		Ssx2ip		Tmem158
		Snapc1		Thbd
		Grin2a		Trpc4
		Pnkd		Tspan13
		Cdk19		Ttc9
		Lmo3		Tmsb10
		Actr2		Tyro3
		Tspan13		Wfs1
		Rnf2		Wnt2
		Cttnbp2nl		Wwc2
		Spnb1		Cx3cl1
		Git1		Zdhhc2
		Sec14l1		Zfp608
		Plcl2		Atp2b1
		Itm2b		Slc8a3
		Atxn1l		Sec14l1
		Actr3b		Zfp462
		Spnb3
		8430419L09Rik
		Gria1
		Kdm3a
		B3gat1
		Hexim1
		Zfp608
		Lmo7
		6330403A02Rik
		Dcun1d4
		Galntl4
		Ppp3ca
		Fzd3
		Arf1
		Ddx46
		Fkbp1a
		R3hdm1
