# Supplementary material for: Exploring the expression patterns of palmitoylating and de-palmitoylating enzymes in the mouse brain using the curated RNA-seq database BrainPalmSeq
Source: eLife. 2022 Jul 12;11:e75804. doi: 10.7554/eLife.75804 (PMC9365392; doi:10.7554/eLife.75804)
Supplement: Figure 2—source data 3. [file elife-75804-fig2-data3.xlsx]

## Sheet: Sheet1
Figure 2 - Source data 3 (Figures 2E, I) KEGG Analysis of regionally enriched neuron expressed palmitoylation substrates (SwissPalm annotated). Performed in Enrichr.
Dorsal CA1 neurons
KEGG	-logP	log P	Overlap	P-value	Adjusted P-value	Odds Ratio	Combined Score	Genes
Calcium signaling pathway	6.98648	-6.98648	7/189	1.0316209215480612E-7	8.148592689733108E-6	22.372171945701357	359.9003330921701	PPP3CA;GRIN2A;PRKCB;ITPKA;ITPR1;ADCY2;ATP2B1
Glutamatergic synapse	6.94018	-6.94018	6/114	1.1476891112300151E-7	8.148592689733108E-6	31.50952380952381	503.53306752503454	GRIA1;PPP3CA;GRIN2A;PRKCB;ITPR1;ADCY2
Long-term potentiation	6.60665	-6.60665	5/67	2.4737424894186705E-7	1.1709047783248374E-5	44.57213261648746	678.0474819567171	GRIA1;PPP3CA;GRIN2A;PRKCB;ITPR1
Circadian entrainment	5.75792	-5.75792	5/99	1.7461252875250861E-6	5.529112545451168E-5	29.351359338061467	389.14359026734536	GRIA1;GRIN2A;PRKCB;ITPR1;ADCY2
Aldosterone synthesis and secretion	5.69372	-5.69372	5/102	2.024300907869452E-6	5.529112545451168E-5	28.439289805269187	372.84722718425746	PRKCB;PDE2A;ITPR1;ADCY2;ATP2B1
Pancreatic secretion	5.63148	-5.63148	5/105	2.3362447375145777E-6	5.529112545451168E-5	27.581944444444446	357.6541283975796	CAR2;PRKCB;ITPR1;ADCY2;ATP2B1
Amyotrophic lateral sclerosis (ALS)	5.41667	-5.41667	4/52	3.83117155823868E-6	7.771805160998464E-5	44.8445945945946	559.3170269846856	GRIA1;PPP3CA;GRIN2A;CASP3
Dopaminergic synapse	5.09588	-5.09588	5/135	8.018966138578986E-6	1.42336648959777E-4	21.18482905982906	248.57645108501322	GRIA1;PPP3CA;GRIN2A;PRKCB;ITPR1
Amphetamine addiction	4.94864	-4.94864	4/68	1.1255283437741026E-5	1.7758336090658065E-4	33.60641891891892	382.93415094327565	GRIA1;PPP3CA;GRIN2A;PRKCB
Oxytocin signaling pathway	4.81828	-4.81828	5/154	1.5195762699442127E-5	2.0347136670642013E-4	18.465697240865026	204.86756611355307	PPP3CA;CACNG8;PRKCB;ITPR1;ADCY2
Dorsal Dentate Gyrus neurons
KEGG	-logP	log P	Overlap	P-value	Adjusted P-value	Odds Ratio	Combined Score	Genes
Ribosome	57.2241	-57.2241	55/170	5.9683305010471814E-58	1.3906210067439932E-55	37.007561436672965	4876.244642796968	RPL4;RPL30;RPL32;RPL34;RPLP1;RPLP0;RPL8;RPL10A;RPL9;RPL6;RPL7;RPS4X;RPL7A;RPS17;RPS16;RPS19;RPL18A;RPL36;RPL38;RPL37;RPS11;RPS10;RPS13;RPS9;RPL21;RPS7;RPL22;RPL13A;RPSA;RPL37A;RPL27;RPL29;RPL28;UBA52;RPL10;RPL12;RPL11;RPL36A;RPS15A;RPL14;RPS3;RPL15;RPS2;RPS27A;RPL17;RPL35A;RPS26;RPS25;RPS28;RPS27;RPS29;RPS20;RPS21;RPS24;RPS23
Cholinergic synapse	3.43792	-3.43792	8/113	3.6482404261729297E-4	0.023922747802276833	4.9744761904761905	39.37842806714151	CAMK2B;KCNJ4;GNB2;AKT1;PRKACB;CAMK2G;KCNJ2;MAPK3
Parkinson disease	3.39688	-3.39688	9/144	4.0097437447923106E-4	0.023922747802276833	4.360535117056856	34.106418318740914	NDUFB8;NDUFA7;GNAL;NDUFS8;NDUFA11;NDUFC2;PRKACB;SEPT5;COX6B1
Thyroid hormone signaling pathway	3.38648	-3.38648	8/115	4.1069094939531043E-4	0.023922747802276833	4.880996884735202	38.06040090018673	TRP53;AKT1;EP300;ATP1B2;ATP1A1;PRKACB;FOXO1;MAPK3
Circadian entrainment	3.06929	-3.06929	7/99	8.525304800295107E-4	0.030562751717791915	4.954499494438827	35.01494218316752	CAMK2B;ADCYAP1R1;GNB2;PRKACB;CAMK2G;CACNA1H;MAPK3
Gastric acid secretion	3.00973	-3.00973	6/74	9.778556062626832E-4	0.030562751717791915	5.733541098558629	39.734291477149526	CAMK2B;ATP1B2;ATP1A1;PRKACB;CAMK2G;KCNJ2
Glioma	2.97907	-2.97907	6/75	0.0010493648658469327	0.030562751717791915	5.650158364526346	38.75765787196918	CAMK2B;CDK4;TRP53;AKT1;CAMK2G;MAPK3
Pancreatic cancer	2.97907	-2.97907	6/75	0.0010493648658469327	0.030562751717791915	5.650158364526346	38.75765787196918	SMAD3;CDK4;TRP53;STAT3;AKT1;MAPK3
cAMP signaling pathway	2.7796	-2.7796	10/211	0.001661109255075375	0.043004272936951374	3.2540318541520583	20.82668139380041	CAMK2B;ADCYAP1R1;AKT1;RRAS2;EP300;ATP1B2;ATP1A1;PRKACB;CAMK2G;MAPK3
Adrenergic signaling in cardiomyocytes	2.67428	-2.67428	8/148	0.002116976291961873	0.044694472347096524	3.724190476190476	22.932695300933542	CAMK2B;CACNG7;AKT1;ATP1B2;ATP1A1;PRKACB;CAMK2G;MAPK3
