# Supplementary material for: Exploring the expression patterns of palmitoylating and de-palmitoylating enzymes in the mouse brain using the curated RNA-seq database BrainPalmSeq
Source: eLife. 2022 Jul 12;11:e75804. doi: 10.7554/eLife.75804 (PMC9365392; doi:10.7554/eLife.75804)
Supplement: Figure 2—source data 4. [file elife-75804-fig2-data4.xlsx]

## Sheet: Sheet1
Figure 2 - Source data 4 (Figures 2F, J) SynGO Analysis of regionally enriched neuron expressed palmitoylation substrates (SwissPalm annotated). Biological Process.
Dorsal CA1 neurons
GO term name	-logP	logP	GSEA 'gene cluster' FDR corrected p-value	genes - hgnc_symbol
process in the synapse	8.31849	-8.31849	4.803e-09	GRIA1;GRIN2A;HCN1;PRKCB;GIT1;CADPS2;FZD9;ITPR1;CACNG8;BCR;HTR1A;PPP3CA;ADGRL2;ITPKA;ARF1
process in the postsynapse	5.50293	-5.50293	3.14105e-06	FZD9;ITPR1;HCN1;GRIN2A;GRIA1;CACNG8;GIT1
process in the presynapse	3.98443	-3.98443	0.00010365	GRIA1;GRIN2A;HCN1;PRKCB;GIT1;CADPS2
regulation of presynaptic membrane potential	3.45317	-3.45317	0.00035223	GRIA1;GRIN2A;HCN1
regulation of postsynaptic membrane potential	3.27837	-3.27837	0.000526776	HCN1;GRIN2A;GRIA1
synaptic vesicle exocytosis	3.07949	-3.07949	0.000832732	PRKCB;GIT1;CADPS2
synapse organization	3.07949	-3.07949	0.000832732	ADGRL2;FZD9;ITPKA;GIT1;ARF1
chemical synaptic transmission	2.20958	-2.20958	0.00617197	BCR;HTR1A;PPP3CA
Dorsal Dentate Gyrus neurons
GO term name	-logP	logP	GSEA 'gene cluster' FDR corrected p-value	genes - hgnc_symbol
translation at presynapse	42.3308	-42.3308	4.66922e-43	RPL22;RPL9;RPL10;RPL10A;RPL11;RPL12;RPL13A;RPL14;RPL17;RPL15;RPL27;RPL28;RPL29;RPL32;RPL34;RPL35A;RPL36;RPL36A;RPL37;RPL37A;RPL38;RPL4;RPL6;RPL7;RPL7A;RPL8;RPLP0;UBA52;RPS10;RPS11;RPS15A;RPS16;RPS24;RPS26;RPS27A;RPS28;RPS13;RPS27
translation at postsynapse	41.5058	-41.5058	3.12008e-42	RPL9;RPL10;RPL10A;RPL11;RPL12;RPL13A;RPL14;RPL17;RPL15;RPL22;RPL27;RPL28;RPL29;RPL32;RPL34;RPL35A;RPL36;RPL36A;RPL37;RPL37A;RPL38;RPL4;RPL6;RPL7;RPL7A;RPL8;RPLP0;UBA52;RPS10;RPS11;RPS15A;RPS16;RPS24;RPS26;RPS27A;RPS28;RPS13;RPS27
process in the synapse	23.0226	-23.0226	9.49228e-24	MARCKSL1;GRIK3;GRIK5;GRIK2;SYT7;SEPTIN5;NAPA;SLC30A3;EHD1;PTPN23;SLC6A1;SGTA;SLC8A2;GLRA2;CNIH3;CACNG7;GPC4;STAT3;GUCY1A1;EFNB3;PRKAR2B;AKAP7;NCAM1;MAPK3;NPY5R;AKT1;MARCKS;CAMK2B;DBN1;RPL22;RPL9;RPL10;RPL10A;RPL11;RPL12;RPL13A;RPL14;RPL17;RPL15;RPL27;RPL28;RPL29;RPL32;RPL34;RPL35A;RPL36;RPL36A;RPL37;RPL37A;RPL38;RPL4;RPL6;RPL7;RPL7A;RPL8;RPLP0;UBA52;RPS10;RPS11;RPS15A;RPS16;RPS24;RPS26;RPS27A;RPS…
process in the presynapse	1.9873	-1.9873	0.0102967	MARCKSL1;GRIK3;GRIK5;GRIK2;SYT7;SEPTIN5;NAPA;SLC30A3;EHD1;PTPN23;SLC6A1;SGTA
ligand-gated ion channel activity involved in regulation of presynaptic membrane potential	1.54523	-1.54523	0.0284951	GRIK3;GRIK5;GRIK2
synaptic signaling	1.35699	-1.35699	0.043955	GUCY1A1;EFNB3;PRKAR2B;STAT3;AKAP7;NCAM1;MAPK3;NPY5R
modulation of chemical synaptic transmission	1.35699	-1.35699	0.043955	PRKAR2B;STAT3;AKAP7;NCAM1;MAPK3
process in the postsynapse	1.24979	-1.24979	0.0562614	SLC8A2;GLRA2;GRIK2;GRIK5;CNIH3;CACNG7;GPC4;STAT3
transmitter-gated ion channel activity involved in regulation of postsynaptic membrane potential	1.24979	-1.24979	0.0562614	GLRA2;GRIK2;GRIK5
neurotransmitter receptor localization to postsynaptic specialization membrane	1.24979	-1.24979	0.0562614	CNIH3;CACNG7;GPC4
trans-synaptic signaling	1.24979	-1.24979	0.0562614	GUCY1A1;EFNB3;PRKAR2B;STAT3;AKAP7;NCAM1;MAPK3
synaptic vesicle exocytosis	0.800571	-0.800571	0.158281	SYT7;SEPTIN5;NAPA
synaptic vesicle cycle	0.610232	-0.610232	0.24534	SYT7;SEPTIN5;NAPA;SLC30A3;EHD1
synapse organization	0.382357	-0.382357	0.414613	AKT1;MARCKS;CAMK2B;GPC4;NCAM1;DBN1
