# Supplementary material for: Exploring the expression patterns of palmitoylating and de-palmitoylating enzymes in the mouse brain using the curated RNA-seq database BrainPalmSeq
Source: eLife. 2022 Jul 12;11:e75804. doi: 10.7554/eLife.75804 (PMC9365392; doi:10.7554/eLife.75804)
Supplement: Figure 2—source data 5. [file elife-75804-fig2-data5.xlsx]

## Sheet: DG enriched genes
Figure 2 - Source data 5 (Figure 2H) Dorsal Dentate Gyrus (dDG) enriched predicted palmitoylome
		1267 genes		1096 genes		308 genes
Hipposeq settings		dDG enriched		dDG enriched & UniProt reviewed		dDG enriched & UniProt reviewed & SwissPalm annotated		Enriched genes	1096
Enriched Populations: dg_d		Efna1		Sh3bp1		Abcg1		SP annotated	308
Depleted Populations: ca1_d,ca2,ca3_d		Olfr197		Eif4ebp2		Ablim3		% found SP	28.1022
Fold threshold: 1.5		Hist1h4k		Htr6		Scd1		% not found SP	71.8978
FPKMmin threshold: 5		Rtp3		Atg16l1		Actr1b
FDR: 0.05		Gm12890		Abcg1		Adam15
Cell Lines: ca1_d,ca2,ca3_d,dg_d		Gm12390		Abhd8		Adck1
Replicates: No		Gm11728		Abhd11		Akap7
Normalised Expression: No		7SK		Ablim3		Akt1
		Grik3		Acd		Anp32a
		Kcnc4		Acot13		Anxa11
		Stard8		Scd1		Anxa6
		Nhlh1		Acpl2		Arl6ip6
		Dnase1l1		Actr1b		Arhgef1
		Brip1		Adam15		Arid1a
		Kirrel3		Adck1		Akr7a5
		Dock10		Add2		Arl8a
		Lrrtm3		Adipor2		Aspscr1
		Egr2		Adrm1		Asphd2
		Pdzd2		Aebp2		Atp11a
		Sned1		Ado		Atp1a1
		Stxbp6		Afap1		Atp1b2
		Rreb1		Aff4		Atp9b
		Stra6		Agap1		B4galt1
		Prkd1		Eif2c1		Bag3
		Suv420h2		Akap7		Baz1b
		Ccdc163		Aurkaip1		Brsk1
		Atxn7l2		Akap8l		C1qbp
		Slc4a4		Akt1		C1qtnf4
		Adarb2		Alkbh6		C2cd2l
		Tigd5		Fam123c		Cacna1h
		Plekha2		Metap1d		Cpm
		Btg2		Ankrd13a		Cbr1
		Gfra1		Ankrd13d		Cacng7
		Fam163b		Anp32a		Cd72
		Slc29a4		Ankrd6		Cdk4
		Slc9a5		Anks3		Chchd3
		Bambi		Prmt8		Cirh1a
		Ghr		Ankrd10		Cnih3
		Shkbp1		Ankrd16		Cnnm1
		Syt17		Anxa11		Coro1b
		Gm17401		Anxa6		Coro2b
		Tnfrsf25		Ap1s2		Cotl1
		Lrrc16a		Apcdd1		Cox18
		Tiam1		Apex2		Cyp46a1
		C2cd4a		Aplp1		Cyp7b1
		Mcm6		Arl6ip6		Csf1
		Foxo1		Arglu1		Csf2ra
		Ifitm2		Arhgef1		Ctdspl
		Kcnn3		Net1		Cox6b1
		Usp50		Adprhl2		Cxxc1
		Jun		Arid1a		Cstb
		Fos		Arid3b		Dbr1
		Crlf1		Akr7a5		Diras1
		N4bp2		Arl4d		Dock10
		Fosb		Arl8a		Ddt
		Sh3bp1		Arpp21		Dpysl4
		Ntng1		Asna1		Dbn1
		Dact1		Aspscr1		Dtd1
		Man1c1		Asphd2		Ddx39b
		Mfap4		Ppp1r13b		Ece1
		Gm13889		Atp11a		Echs1
		Cnih3		Atp1a1		Eef1a1
		Mef2c		Atp1b2		Efnb3
		Egr4		Atp5g1		Ehd1
		Hdac7		Atp5g2		Eif3f
		Igsf3		Atxn7l1		Eif3k
		Pak4		Atf7		Elavl3
		Slc29a1		Atn1		Tceb2
		Maml2		Atp5k		Ep300
		Myl6b		Atp5j		Ermp1
		2200002D01Rik		Atp5l		Fam114a2
		Adcyap1r1		Atp9b		Fam163b
		Grm3		Adamts20		Fahd2a
		B4galt1		Atxn7		Foxo1
		Hist1h1d		B3galt5		Fsd1
		Plxna3		B4galt1		Khsrp
		Myo19		B4galt2		Fyco1
		Lrtm2		B4galt3		Gatsl2
		Pitpnm2		Kctd13		Gba2
		Itgb8		Banf1		Gnb2
		Frmd4b		Bag3		Gnb2l1
		Fzd8		Bag4		Gucy1a3
		Inha		Bai1		Gfod1
		Rgs9		Baiap2		Glra2
		Ext2		Bambi		Gmppa
		Frmd5		Baz1b		Gnal
		Scand1		Bcar1		Gpr108
		Rfx5		Bcl6		Agpat6
		Gm13308		Bcl9l		Gpc4
		Marcksl1		Bcorl1		Gpd1
		Zadh2		Ngfrap1		Grik2
		Lrrtm4		Bhlhe22		Grik3
		Shisa9		Bloc1s1		Grik5
		4933415A04Rik		Bmp1		Gstm1
		Mapk3		Bmp2k		H2afx
		Pcdh8		Gdf10		Hist2h2be
		Map3k1		Brd3		Hist3h2ba
		Slc16a11		Brd4		Hist1h3e
		Vwa5b2		Rnf20		H3f3b
		Gadd45g		Brsk1		Hebp1
		Peg10		Btbd3		Hint1
		Magi1		Btf3		Hmgb1
		Rnf31		Btg1		Hmgcl
		Csf1		Btg2		Hpcal1
		Vars		C1qbp		Ifitm2
		Gm10654		C1qtnf4		Igsf8
		Mpst		C2cd2l		Imp3
		Gm16869		Cacna1h		Kcnj2
		Odz1		Car12		Kcnj4
		Apcdd1		Caly		Islr2
		Hps5		Cblb		Isoc1
		Tinf2		Cpm		Itpa
		Rfx3		Cbr1		AU040320
		Pnkp		Ccdc107		Prkar2b
		Tmem108		Ccdc85a		Prkacb
		5730577I03Rik		Ccdc71		Camk2b
		Stxbp2		Ccdc93		Camk2g
		Micall1		Cacng7		Kcnc3
		Lingo2		Ccnjl		Kcnk1
		Bag3		Ccnl1		Khdrbs1
		Nt5dc2		Ccnl2		Lhfpl2
		Nbeal2		Gm1673		Lta4h
		Rrp1b		Cd72		Lman1
		Ipcef1		Cdc23		Lrrc16a
		Med25		Cdhr1		Lyst
		Vstm2b		Cdk4		Map3k12
		Gstm1		Cdkal1		Marcks
		Secisbp2		Cdr2l		Mcm6
		Lonrf3		Celf3		Mecr
		Rsph3b		Celsr3		Mfap3
		1700088E04Rik		Cenpw		Mif
		Cald1		Ccdc21		Fam96b
		Igsf1		Ccdc123		Palm
		Polg2		Chchd3		Mapk3
		Il17d		Chd7		Mogs
		Nrip2		Cherp		Brp44l
		Ppard		Chfr		Marcksl1
		Sema6d		Cic		Mt1
		A230050P20Rik		Cirh1a		Mtch2
		Vps37b		Gm13889		Cbfa2t2
		AC027184.1		D10Wsu102e		Mut
		Ppp1r16b		Clec16a		Slc2a13
		BC002230		Clk1		Myl6b
		Spry1		Clp1		Ncam1
		Fam124a		Cnih2		Ncdn
		Cdhr1		Cnih3		Ndufa7
		Pard3		Cnnm1		Ndufa11
		Htr6		Cnot3		Ndufb8
		Pnck		Cnot6		Ndufc2
		Ablim3		Commd3		Ndufaf3
		Dgkh		Coro1b		Ndufs8
		Ankrd6		Coro2b		Nfx1
		Il1rap		Cotl1		Nit1
		Mbd6		Cox10		Npy5r
		Crocc		Cox18		Nup62
		Gm10800		Cox8a		Trp53
		Syt10		Cyp2r1		Pabpc1
		Slc6a1		Cyp46a1		Adcyap1r1
		Emx1		Cyp7b1		Paqr9
		Id2		Cpeb4		Pcnxl3
		Hist1h3e		Cpsf1		Pdxdc1
		Npas4		Creld2		Pgpep1
		Prkar2b		Crlf1		Phb2
		Sox12		Crocc		Phyhipl
		Inpp5j		Csdc2		Pigt
		5031425E22Rik		Csf1		Pitpnc1
		Tmub1		Csf2ra		Pitpnm2
		Itgav		Csnk2b		Pkd1
		Gng7		Ctdspl		Agpat1
		Chd7		Chtf8		Agpat3
		Arid3b		Cntnap5b		Pdxp
		2010204K13Rik		Ctdspl2		Pom121
		Mxd4		Cul9		Ppia
		4933427D14Rik		Cox6a1		Prdx1
		Hps4		Cox6b1		Psma5
		Cacna1h		Cxxc1		Psmb2
		Saal1		Cstb		Psmb3
		Cacng7		Dab1		Psmd8
		Mt1		Dact1		Ptbp1
		Cul9		Dact3		Ptpn23
		Ttc26		Dbr1		Pvr
		Mapkapk2		Dcaf8		Pwp2
		Rasgrf2		Dclk3		Pex11a
		Erf		Ddr1		Pex11c
		Hdac5		Ddx49		Pan2
		Ccdc21		Dennd2a		Rfx3
		Csdc2		Dexi		Rasgrf2
		Gm11851		Dgat2		Rgs9
		Gm11261		Dgcr8		Ric8
		Usp13		Dhx33		Rpl10a
		Lsm10		Dhx8		Rpl10
		Zfp579		Diap1		Rpl11
		Pitpnc1		Diap2		Rpl12
		Ccnjl		Diras1		Rpl13a
		Gm12521		Dlgap3		Rpl14
		Tmem39b		Dmwd		Rpl15
		Fahd2a		Dnalc4		Rpl17
		Slc2a8		Dnajb1		Rpl18a
		C030044B11Rik		Dnajb5		Rpl21
		1110005A03Rik		Dnajc4		Rpl22
		Dhx16		Dnlz		Rpl27
		Ap1s2		Dnmt3a		Rpl28
		Vipr1		Dnase1l1		Rpl29
		Pde1b		Dock10		Rpl30
		Isoc1		Dock3		Rpl32
		Btg1		Ddt		Rpl34
		Slc39a6		Mbd3		Rpl35a
		2810453I06Rik		Pold2		Rpl36a
		Trp53i11		Polg2		Rpl36
		Pold2		Pola1		Rpl37a
		5430405H02Rik		Dpp7		Rpl37
		Dennd2a		Dpysl4		Rpl38
		Tmem170		Dbn1		Uba52
		Pcsk1n		Dtd1		Rpl4
		Susd1		Dtx3		Rpl6
		B4galt3		Dusp11		Rpl7a
		Zcchc12		Dusp14		Rpl7
		Wnt7b		Dusp18		Rpl8
		Sec24d		Dus3l		Rpl9
		Mgat4b		Dusp4		Rplp0
		Car12		Dusp7		Rplp1
		Pias4		Dvl3		Rnf208
		Sema5a		Ddx39b		Rnasek
		Ube2l6		Dnm2		Rogdi
		Rras2		Dyrk1b		Rpia
		Arl6ip6		E2f4		Rras2
		Mtss1l		Ebp		Rreb1
		Ccdc85a		Ece1		Rrp1b
		Acpl2		Echs1		Rps10
		Cotl1		Edf1		Rps11
		Cpm		Eef1a1		Rps13
		Thap1		Efhd2		Rps15a
		Pacsin2		Efna1		Rps16
		Fance		Efnb3		Rps17
		H2afx		Egln1		Rps19
		Pola1		Egr2		Rps20
		Gm17322		Egr3		Rps21
		Tbkbp1		Egr4		Rps23
		Junb		Ehd1		Rps24
		Slc2a13		Eif3f		Rps25
		Kcng1		Eif3k		Rps26
		Siva1		Elavl3		Rps27a
		Cdkal1		Elk1		Rps27
		Sh3gl1		Ell		Rps28
		Sipa1l2		Elmod3		Rps29
		4930429F24Rik		Tceb2		Rps2
		1810031K17Rik		Elp4		Rps3
		Acp6		Eml4		Rps4x
		B930041F14Rik		Eml5		Rps7
		Hlf		Emx1		Rps9
		Kcng2		Ep300		Snrpb
		Klf13		Epha10		Rpsa
		Ino80b		Epn1		Mrps30
		Slc16a10		Eral1		Rtp3
		March11		Erf		Snrnp70
		Ddr1		Ermp1		Sec14l2
		Fbrsl1		Ets2		Slc25a42
		Efhd2		Exd2		Slc26a2
		Gdf10		Exosc4		Slc29a1
		Spata13		Exosc8		Slc35a2
		Maml3		Ext2		Slc39a6
		Arhgap20		Fam102b		Slc45a1
		2310046O06Rik		Fam114a2		Slc4a4
		Dnm2		Fam163b		Saal1
		Ube2s		Fam175a		Slc6a1
		Afap1		Fam178a		Scamp3
		Tspan18		Fam193b		Scamp4
		Scrt2		Fam57b		Sept5
		Cblb		Fam65a		Sf1
		C330006K01Rik		Fam96a		Sf3b5
		Snhg7		Fads1		Sgta
		Smad3		Fahd2a		Sh3bgrl3
		Rab36		Brip1		Mapkap1
		Hist3h2ba		Fastk		Smad3
		Zc3h3		Fat4		Napa
		Rps28		Fbll1		Srm
		Spag6		Fbrs		Spns1
		Rps6ka4		Fbxo7		Spns2
		Pstpip2		Fbxl6		Sorbs1
		Inpp4b		Fchsd1		Srsf1
		Pvr		Ficd		Srsf7
		Dgat2		Fnip2		Stat3
		Fosl2		Zfpm2		Sars2
		Xkr6		Fosb		Syt13
		Prr7		Fosl2		Syt17
		Leng8		Fos		Syt7
		Ccdc123		Foxj2		Vars
		Gfm2		Foxk1		Tet2
		Ankrd13a		Foxo1		Acaa1a
		Mapk4		Foxo3		Mpst
		Slc30a3		Frmd4b		Trim28
		9530077C05Rik		Frmd3		Tmem43
		Btbd2		Frmd5		Tomm40
		2410002I01Rik		Fsd1		Tspan33
		Rab3d		Khsrp		Txndc5
		Syn3		Flywch2		U2af2
		Ncam1		Fyco1		Ube2m
		Tpra1		Fzd8		Ube2s
		Zfp64		Gadd45g		Hrsp12
		Exosc8		Galc		Usmg5
		Gpr19		Gatsl2		Wdr43
		Selm		Gba2		Zadh2
		Cdr2l		Gnb2		Zdhhc1
		Zc3h7b		Gng7		Zdhhc4
		Pex11c		Gnb2l1		Zdhhc8
		Csmd2		Gabra4		Slc30a3
		Fam184a		Tubgcp2		Aldh3b2
		Fat4		Gucy1a3		Slc8a2
		Ttc17		Gdf11
		Gdpd5		Gdpd5
		Thsd7a		Gfod1
		Stk32c		Gfra1
		Pcdhb6		Gfra2
		Cyp2r1		Ghr
		Ptprz1		Hagh
		Bnip1		Glra2
		Ypel4		Gmeb1
		1190007I07Rik		Gmppa
		Adamts20		Gnal
		Fyco1		Gpr108
		Mlh1		Agpat6
		Gpc4		Gpc4
		1300010F03Rik		Gpd1
		Arl4d		Gpr19
		Zdhhc1		Grasp
		Bcar1		Grik2
		Plxdc2		Grik3
		Hap1		Grik5
		Tcp11l2		Gramd1a
		Lins		Grm3
		2310022B05Rik		Gstm1
		Rad51l3		Gm16515
		Ralgapa2		Gtpbp10
		Sdc3		Slc2a8
		Ripk2		H1f0
		4930534B04Rik		Hist1h1d
		Ppapdc3		Hist1h1e
		Gm10576		H2afv
		Sema4b		H2afx
		Sec14l2		H2afz
		Nup35		Hist2h2be
		Plekhg5		Hist3h2ba
		Ptbp1		Hist1h3e
		Rpl26		H3f3b
		Mogs		Hap1
		Auts2		Hdac5
		Gm11669		Hdac6
		Gnal		Hdac7
		Bmp1		Hebp1
		Clp1		Helz
		4930473A06Rik		Nhlh1
		Hdac6		Hexdc
		Nup62		Higd2a
		Akap7		Hint1
		Adprhl2		Hipk2
		Hmgcl		Hlf
		Zmiz1		Hmgb1
		Hist2h2be		Hmgcl
		Szt2		Hmgn2
		Snta1		Hmgn3
		Pcid2		Hnrnpul1
		Fnip2		Rbck1
		Npy1r		Hpcal1
		Gm17167		Hps4
		Ssbp4		Hps5
		Zdhhc4		Hscb
		Mettl3		Hsf1
		Thap7		Ipcef1
		Nmral1		Id2
		Klhl32		Ifitm2
		Ctdspl		Iglon5
		Mcf2l		Igsf1
		Frmd3		Igsf3
		Aldh3b2		Igsf8
		Ebp		Ikzf4
		Hpcal1		Il1rap
		Epha10		Ilkap
		Gm1673		Imp3
		C1qtnf4		Imp4
		Recql5		Ino80b
		Hist2h4		Inha
		Palm		Inhba
		Tef		Inpp4b
		Tbc1d20		Ip6k2
		Zfp629		Pkig
		Kptn		Ipo13
		Creld2		Iqsec2
		Npy5r		Kcnj2
		Zfp708		Kcnj4
		Rtn4rl2		Irs2
		Hist1h2bc		Islr2
		Vstm2a		Isoc1
		Celsr3		Itgav
		Gpd1		Itpa
		Asna1		Jdp2
		Tmem132b		Jmjd1c
		Nrgn		Josd2
		Josd2		Jph1
		Sntb2		Junb
		Pknox2		Jund
		Kcnc3		Jun
		Tfpt		AU040320
		Tet3		Taf9
		Flywch2		Prkar2b
		H1f0		Prkacb
		Zfp523		Myst3
		Efnb3		Myst4
		Ccdc107		Pnck
		Mrpl33		Camk2b
		Nfil3		Camk2g
		Fam193b		Kcnmb4
		Mrpl54		Kcnc3
		D0H4S114		Kcnc4
		Lsm2		Kcng1
		Rpl28		Kcnk1
		Sorbs1		Kcnn3
		Gtf2a2		Kctd5
		Rcor3		Kdm5c
		Lta4h		Kdm6a
		Lhfpl2		Khdrbs1
		Scd1		Kif13a
		Tbc1d8b		Wwc1
		Pdlim7		Kif1c
		Zfp574		Kifc2
		E330020D12Rik		Kirrel3
		AY036118		Camkk1
		Lepre1		Klf13
		Vrk1		Klf9
		Hipk2		Klhl17
		Jund		Klhl26
		Rnf217		Prkd1
		Fbxl6		Prkcq
		Safb2		Kptn
		Net1		Kri1
		A230004M16Rik		Rps6ka4
		Tspan33		Rps6ka5
		Rps16		Rps6kb2
		Zswim4		Ksr1
		Arhgef1		Luc7l2
		Mtap1s		Lcor
		RP24-112A20.1.1		Leng8
		Sars2		Grina
		Zfyve28		Lhfpl2
		Rbck1		Lingo2
		Nit1		Limch1
		Rnpepl1		Limd2
		Dtx3		Lin37
		Galc		Lin7c
		Setd1b		Lins
		Atp6v0e		Lta4h
		Atn1		Lman1
		Ets2		Lonrf3
		Prosapip1		Lrrc16a
		Tmem150b		Lrrc47
		Hist1h1e		Lrp8
		Hist1h2be		Lrrn1
		Sec61g		Lrrtm3
		Penk		Lrrtm4
		B4galt2		Lrtm2
		Rpl41		Lsm10
		Rplp1		Lsm2
		Ddx49		Zfyve28
		Mecr		Lyar
		BC017647		Lyst
		Gatsl2		Map3k12
		Ngef		Map3k1
		Sass6		Map3k4
		Aspscr1		Mapkbp1
		Cenpw		Mxd4
		Qsox1		Magi1
		Dusp7		Mamld1
		Cyp7b1		Mtap1s
		Rnf121		Mapkapk2
		Apex2		Marcks
		Zufsp		March11
		Egr3		Mast4
		Acaa1a		Matk
		Ccdc93		Maz
		Stard13		Mbd4
		Cyp46a1		Mbd5
		Map3k4		Mbd6
		Dclk3		Mbip
		Per3		Mbtd1
		Stat3		Mcf2l
		Kctd17		Mcm6
		Raver1		Mcmbp
		Irs2		Mdm2
		Rps6kb2		Mecr
		Cic		Med15
		Zfp358		Med21
		Phf1		Med25
		Dnlz		Med27
		Pkig		Mef2c
		Zfp319		Mef2d
		AB041803		Meis3
		Gtpbp10		Mettl22
		Meis3		Mfap3
		Ddt		Mfap4
		Ypel3		Mfn1
		Chchd3		Mfsd8
		BC029214		Mgat4b
		Akr7a5		Mif
		Kif13a		Micall1
		2810046L04Rik		Fam96b
		Sgsm2		Palm
		Kcnj4		Mapk3
		Lyst		Mapk4
		H2afz		Mkl1
		1110038B12Rik		Mkl2
		Piga		Mlh1
		Rpl22l1		Mll1
		Dusp4		Mll2
		Bmp2k		Mll3
		Rgs11		Mmachc
		Camk2g		Trit1
		Cd72		Mogs
		Slc25a42		Slc16a10
		Lekr1		Slc16a11
		Pabpc4		Map2k6
		Ptpre		Brp44l
		0610007P08Rik		Marcksl1
		Ilkap		Msi2
		AU040320		Msl2
		5730528L13Rik		Mospd3
		Mrpl55		Mt1
		Phyhipl		Mettl3
		Ptch1		Mtch2
		Dnmt3a		Mterfd3
		Dnalc4		Mtf2
		Patz1		Cbfa2t2
		Zfpm2		Sbf1
		Rapgefl1		Mtrr
		H2afv		Mtss1l
		Pgpep1		Mut
		Fbrs		Mxi1
		Mamld1		Bmyc
		Dnajc4		Slc2a13
		Stag1		Myl6b
		Diap1		Myo19
		Kctd5		Myo9b
		Fam96b		Ppp1r12b
		Agap1		Nanos1
		Fam175a		Napepld
		Ece1		Nbeal2
		Rps27a		Ncam1
		Rps17		Ncdn
		Fau		Ncor2
		Spns2		Ncs1
		Brpf3		Neurod2
		Trerf1		Ndufa3
		Cdk4		Ndufa6
		Xpr1		Ndufa7
		Zfp362		Ndufa11
		Dexi		Ndufb8
		Imp4		Ndufc1
		Jph1		Ndufc2
		Mbip		Ndufaf3
		Tmem160		Ndufs8
		0610010O12Rik		Nedd4l
		Rps23		Nenf
		Pqlc1		Nrgn
		Bzrap1		Nfatc3
		Unc5d		Nfil3
		Csf2ra		Nfix
		Rpl36		Nfx1
		Mterfd3		Nfya
		Bcl9l		Ngef
		Rnf44		Slc9a3r2
		Ubash3b		Nip7
		Mfn1		Nit1
		Tada2a		Nmral1
		Rpusd2		Ccrn4l
		Akap8l		Npas4
		Rpa3		Npy1r
		Fam123c		Npy5r
		Myst4		Nr2c1
		Ell		D0H4S114
		Nup54		Nrip2
		Snapc4		Smpd4
		Gpr108		Nelf
		Ncor2		Ntng1
		Sf3b4		Ntrk3
		Dtd1		Nup35
		Rai1		Nup54
		Glra2		Nup62
		Scn3a		Nupl1
		Rnf208		Nvl
		Fbll1		Orai2
		Kif1c		Orc6
		Lrrc47		Ost4
		Eral1		Lepre1
		Dusp11		Trp53
		Rps27		Trp53i11
		Tor2a		Pabpc1
		Zfp687		Pacsin2
		Elmod3		Adcyap1r1
		Sesn1		Pak4
		Neurod2		Pan2
		Dlgap3		Paqr9
		Metap1d		Mmd2
		Gfra2		Pard3
		Marcks		Patl1
		Foxo3		Pcdh19
		Slc9a3r2		Pcdh8
		Pdrg1		Pcgf6
		Dpp7		Pcid2
		Cntnap5b		Pcsk1n
		Cnot6		Pcnxl3
		Helz		Pcyt1a
		Limch1		Pde1b
		Rpusd3		Pde7a
		Rps19		Pdgfa
		Vsig2		Pdgfb
		Spns1		Pdlim7
		Rpl37a		Pdrg1
		Zc3h12c		Pdxdc1
		Cox6a1		Peg10
		Tmem132a		Penk
		Dpysl4		Per1
		Dbr1		Per2
		Prcc		Per3
		Sparcl1		Pex14
		Hscb		Pfdn1
		Smpd4		Pgpep1
		Rad51c		Phb2
		Pcdh17		Phf1
		Kcnj2		Phf2
		Mettl22		Phf6
		Diras1		Phyhipl
		Chchd10		Phkg2
		Slc12a9		Phyhip
		Acd		Inpp5j
		Psmf1		Pias4
		Mtf2		Piga
		Wbp1		Pigt
		2300009A05Rik		Pitpnc1
		Miat		Pitpnm2
		Rps13		Pik3cb
		Ss18		Pkd1
		Sec24b		Plekha2
		Zfp511		Plekha6
		Ccnyl1		Plekhb2
		Fam57b		Plekhg5
		Trim28		Pknox2
		Rab40b		Agpat1
		Ercc4		Agpat3
		Btbd3		Pdxp
		Rps9		5033414D02Rik
		Rxrb		Plxna3
		Snrpb		Pnkp
		Napepld		Pnrc2
		Sorbs2		Pom121
		Rbm22		Ppp1r12c
		Tmem47		Ppp1r16b
		Spice1		Acp6
		Mbd3		Ppapdc3
		1810041L15Rik		Ppard
		Zscan22		Ppia
		Vash1		Pstpip2
		Ipo13		Pqlc1
		Lrrn1		Prpf38b
		Gm16211		Prpf40b
		Gm15298		Prrc2a
		Mbd4		Prdx1
		Foxk1		Prickle1
		Synpo		Prosapip1
		Klhl17		Prr7
		Rps15		Prrt1
		Napa		Psma5
		Grasp		Psmb2
		Slc7a6		Psmb3
		Rnf145		Psmd8
		Dus3l		Psmf1
		Hist1h4d		Ptbp1
		Tm2d3		Ptch1
		Islr2		Ptma
		Ehd1		Ptpn23
		Sdccag3		Ptov1
		Unc5a		Ptpre
		Tnip2		Ptprj
		AI593442		Pvr
		Lrp8		Pwp2
		Dact3		Pex11a
		Rnf112		Pex11c
		Cxxc1		Plxdc2
		Igsf8		Uqcr11
		Rps26		Uqcr10
		Tmem147		Qsox1
		Lcor		Rtn4rl2
		Jdp2		Rad51c
		Snhg12		Rad51l3
		0610030E20Rik		Rab36
		Prpf40b		Rab3d
		2810008D09Rik		Rad52
		Rpl9		Rad9
		Zbtb45		Rai1
		Thop1		Mras
		St7		Raver1
		2210013O21Rik		Rab11b
		Elp4		Rab40b
		Pfdn1		Rbm10
		Hebp1		Rbm22
		Epn1		Rcor3
		Bcl6		Adarb1
		Tmem223		Adarb2
		Pcdhb5		Reps1
		Mcmbp		Rere
		Cbfa2t2		Rexo1
		Cox10		Rpa3
		2210021J22Rik		Rfx3
		Cherp		Rfx5
		Vrk3		Ralgapa2
		Rps6ka5		Rasgrf2
		Ermp1		Rgs11
		Polr2k		Rgs9
		Zdhhc8		Arhgap20
		Pdxdc1		Ric8
		Ost4		Rfk
		Med27		Bzrap1
		Nelf		Riok3
		Pnrc1		Ripk2
		Gmppa		Rilpl1
		Kcnk1		Rpl10a
		Exosc4		Rpl10
		Ankrd13d		Rpl11
		Plekhb2		Rpl12
		Nenf		Rpl13a
		Txndc5		Rpl14
		Gm9747		Rpl15
		Rpl35a		Rpl17
		Mef2d		Rpl18a
		Brsk1		Rpl21
		Klhl26		Rpl22l1
		Ccl27a		Rpl22
		Pex14		Rpl26
		Dyrk1b		Rpl27
		Klhl34		Rpl28
		Atp1b2		Rpl29
		Taok2		Rpl30
		Elk1		Rpl31
		Tomm40		Rpl32
		Pcnxl3		Rpl34
		Sdk2		Rpl35a
		Rplp2		Rpl35
		Slc25a23		Rpl36a
		2410089E03Rik		Rpl36
		Rpl31		Rpl37a
		Snrnp70		Rpl37
		Pwp2		Rpl38
		Ddx39b		Rpl39
		Cpsf1		Uba52
		Mast4		Rpl41
		Ski		Rpl4
		Mfsd8		Rpl6
		Mospd3		Rpl7a
		Rpsa		Rpl7
		Klhl5		Rpl8
		Slc26a2		Rpl9
		0910001L09Rik		Rplp0
		1110038F14Rik		Rplp1
		Orc6		Rplp2
		Scamp3		Mrpl33
		Ankrd16		Mrpl34
		Rpl37		Mrpl42
		Nfya		Mrpl54
		4933427J07Rik		Mrpl55
		Nr2c1		Rnf112
		Rtn4r		Rnf121
		Mmachc		Rnf126
		Prrc2a		Rnf145
		Zfp282		Rnf19a
		Lman1		Rnf208
		Agpat1		Rnf217
		Rpl18a		Rnf31
		0610007C21Rik		Rnf32
		Rpl39		Rnf44
		Bhlhe22		Rnf5
		Adrm1		Rnasek
		Mif		Rogdi
		Mtch2		Polr2k
		Rplp0		Rapgefl1
		Ndufaf3		Rpia
		Mrpl34		Rras2
		Tmed7		Rreb1
		Mkl2		Gfm2
		Slc35a2		Rrp1b
		Cox18		Rps10
		Ikzf4		Rps11
		Ksr1		Rps13
		Tle1		Rps15a
		Spata2		Rps15
		Zfp142		Rps16
		Ccnt2		Rps17
		Per2		Rps18
		Ssna1		Rps19
		Rps21		Rps20
		Zfp414		Rps21
		Brd3		Rps23
		Rad9		Rps24
		Add2		Rps25
		Wbp5		Rps26
		5033414D02Rik		Rps27a
		1110018J18Rik		Rps27
		Fam178a		Rps28
		Dusp14		Rps29
		Dbn1		Rps2
		Pgbd5		Fau
		Gnb2		Rps3
		Echs1		Rps4x
		Adam15		Rps7
		Lyar		Rps9
		Gucy1a3		Rsph3b
		C130039O16Rik		Rasl10b
		Snapc2		Snrpb
		Unc13d		Rpsa
		Hmgn2		Mrps30
		Trim11		Rtn4r
		Ccnl2		Rtp3
		Znf512b		Snrnp70
		Diap2		Rpusd2
		Akt1		Rpusd3
		Ildr2		Snrpg
		Itpa		Rxrb
		Tacc1		Slc12a9
		Aurkaip1		Sec14l2
		Khdrbs1		Sec23ip
		Bag4		Slc25a42
		Lin37		Slc26a10
		Coro1b		Slc26a2
		Ndufa7		Slc29a1
		Spg21		Slc29a4
		Tm2d1		Slc35a2
		Ttc4		Slc39a6
		Gm16515		Slc45a1
		Mrps30		Slc4a4
		Trank1		Saal1
		Fam96a		Safb2
		Tmem109		Tmem66
		Cnot3		Sass6
		Mbtd1		Sec61g
		Nav2		Slc6a1
		Anks3		Slc6a8
		Fam116b		Scamp3
		Asphd2		Scamp4
		Brp44l		Slc25a23
		Chtf8		Scrt1
		Grik2		Scrt2
		Atp1a1		Sdc3
		Nedd4l		Sdccag3
		Kcnmb4		Sdk2
		Mfap3		Sez6l
		Gba2		Bnip1
		Rps25		Selm
		Atad2b		H47
		Rfk		Sema4b
		C1qbp		Sema5a
		Dnajb5		Sema6d
		Cnnm1		Sept5
		Spnb4		Serp2
		Abhd11		Sesn1
		Mxi1		Setd1b
		Hagh		Setd8
		Snhg1		Set
		Rpl29		Sf1
		Phkg2		Sf3b4
		Uba52		Sf3b5
		Tceb2		Sfswap
		Wdr85		Sgsm2
		Tbp		Sgta
		Zcchc9		Sh3gl1
		Gas5		Sh3bgrl3
		Spop		Shank3
		Ndufb8		Shkbp1
		Rad52		Shisa9
		Pex11a		Sipa1l2
		Nfix		Mapkap1
		Gdf11		Siva1
		Rps20		Ski
		Prkcq		Slitrk2
		Zcchc8		Slit1
		Smarcd1		Slmo1
		Prkacb		Smad3
		Rps15a		Samd4b
		Ndufc1		Smg7
		1190007F08Rik		Smarcd1
		Ctdspl2		Napa
		Tob2		Sned1
		Rpl12		Snapc2
		Iglon5		Snapc4
		Trp53		Snta1
		Rbm10		Sntb2
		Inhba		Sox12
		Sf3b5		Sp3
		Hrsp12		Spag6
		Prdm2		Srm
		Hnrnph3		Spg21
		Kctd13		Spice1
		Nfatc3		Spns1
		2410006H16Rik		Spns2
		Mmd2		Spop
		RP23-425D13.4.1		Sparcl1
		BC002059		Spata13
		Tor1a		Spry1
		Rps7		Sorbs1
		Prrt1		Sorbs2
		Adipor2		Srsf10
		Imp3		Srsf1
		H3f3b		Srsf7
		Rps18		Ssna1
		Mras		Ssu72
		Iqsec2		Ss18
		Tnik		Stk32c
		Rnf32		St7
		Trit1		Stard13
		Rnf126		Stag1
		Zbtb7a		Stard8
		Matk		Stat3
		4930503L19Rik		Stra6
		Mtrr		Stxbp2
		Rpl22		Stxbp6
		Med21		Suv420h2
		Hexdc		Syn3
		Wars2		Syne1
		Tomm20		Synpo
		Dusp18		Sars2
		Pkd1		Syt10
		Fbxo7		Syt13
		Trafd1		Syt17
		Syt7		Syt7
		Anxa11		Vars
		Dgcr8		Wars2
		Adck1		Szt2
		Fam114a2		Tcp11l2
		Wdr41		Tmem132a
		Fam100a		Tmem150b
		Camkk1		Tmem170
		Alkbh6		Gtf2a2
		Per1		Tacc1
		Ptpn23		Tada2a
		Myo9b		Tada1
		Slit1		Taok2
		Pan2		Tbc1d20
		Rpl32		Tbc1d8b
		Tubgcp2		Tbca
		Lin7c		Tbkbp1
		Atg16l1		Tbp
		Ficd		Tef
		Abcg1		Odz1
		Pcyt1a		Tet2
		Atp5g1		Tet3
		Pde7a		Tfpt
		Mapkbp1		Thap1
		Setd8		Thap7
		Phf2		Acaa1a
		U2af2		Thop1
		Prdx1		Thsd7a
		Rpl10		Mpst
		Orai2		Tiam1
		Dhx8		Trim24
		Caly		Trim28
		Map2k6		Tigd5
		Kifc2		Timm9
		Rps11		Tinf2
		Limd2		Tle1
		9830001H06Rik		Tmem108
		Ptov1		Tmem109
		Zmiz2		Tmem147
		Pdgfa		Tmem160
		Hsf1		Tmem223
		Rps24		1810027O10Rik
		Bloc1s1		Tm2d1
		Map3k12		Tm2d3
		Fastk		Tmem39b
		Cstb		Tmem43
		Rnasek		Tmem47
		Btf3		Tmub1
		2510006D16Rik		Tnik
		Pdgfb		Tnip2
		Rilpl1		Tnfrsf22
		Rnf5		Tnrc6c
		Gm17386		Tob2
		Rps2		Tomm20
		Fsd1		Tomm40
		Rpl30		Tor1a
		Ric8		Tor2a
		Baiap2		Tpcn1
		Myst3		Tpp1
		Rpl34		Tpra1
		Zfp639		Trafd1
		2900055J20Rik		Trak1
		Snrpg		Trerf1
		Trim24		Trim11
		Nanos1		Trim46
		Gm13722		Trim8
		Rasl10b		Trmt61a
		Sept5		Trank1
		Rpl35		Tspan18
		E2f4		Tspan33
		Trim46		Ttc26
		Atp11a		Ttc4
		Abhd8		Tulp4
		Mll2		Twsg1
		Zfp553		Txndc5
		Ube2m		U2af2
		Sbf1		Ube2l6
		Sh3bgrl3		Fam100a
		Egln1		Ube2m
		Dhx38		Ube2h
		Yipf1		Ube2s
		Ptma		Ubl5
		Scamp4		Usp13
		Eif3f		Usp50
		Eef1a1		Ubqln4
		Slitrk2		Ubash3b
		Rps10		Hrsp12
		Eml4		Ulk1
		1110028C15Rik		Unc13d
		Luc7l2		Unc5a
		Nip7		Unc5d
		Atxn7l1		Usmg5
		Clec16a		Atp6v0e
		Kri1		Vash1
		Cnih2		Vipr1
		Tpp1		Vps37b
		BC018242		Vps28
		Pcgf6		Vrk1
		Syt13		Vrk3
		Msi2		Vsig2
		Trmt61a		Vstm2a
		Mrpl42		Vstm2b
		Paqr9		Vwa5b2
		Dock3		Wbp1
		Slc45a1		Wbp5
		Slmo1		Wdr41
		Fam102b		Wdr43
		1810027O10Rik		Wdr70
		Slc26a10		Wdr85
		Tpcn1		Wnt7b
		Rogdi		Xkr6
		Tsc22d2		Ercc4
		Ndufa6		Xpo6
		Ccrn4l		Xpr1
		Ubl5		Yipf1
		Foxj2		Slc7a6
		Grina		Ypel3
		Twsg1		Ypel4
		Zfp609		Zadh2
		Rnf20		Zbtb7a
		Ankrd10		Zc3h12c
		Srsf10		Zc3h3
		Pcdh19		Zcchc12
		Ppp1r12c		Zcchc8
		Commd3		Zcchc9
		Reps1		Zdhhc1
		Tada1		Zdhhc4
		Wdr70		Zdhhc8
		Wwc1		Zfand5
		Mut		Zfp64
		B3galt5		Zmiz1
		Psmb3		Zmiz2
		Pdxp		Zfp319
		Elavl3		Zfp414
		Eif3k		Zfp488
		Ppp1r13b		Zfp511
		Msl2		Zfp532
		Arl8a		Zfp574
		Gnb2l1		Zfp579
		Zfp532		Zfp609
		C2cd2l		Zfp629
		Ip6k2		Zfp639
		Med15		Zfp652
		2310016M24Rik		Zfp664
		Rps29		Zfp687
		Kdm5c		Zfp746
		Bcorl1		Zfp553
		Ngfrap1		Zfp523
		Eif2c1		Slc30a3
		Cox6b1		Zswim4
		Tmem43		Zufsp
		Tulp4		Aldh3b2
		Fads1		Slc8a2
		Ndufa11		Pcdhb6
		Phyhip		Ildr2
		Pnrc2		Ptprz1
		Ccdc71		Recql5
		Csnk2b		Rnpepl1
		Prickle1		Ttc17
		Prpf38b		Ccnt2
		Fchsd1		Prr12
		Ndufa3		Zc3h13
		Gm561		Pgbd5
		Atf7		Auts2
		Dhx33		Zbtb45
		Eif4ebp2		Gltscr1
		Khsrp		Spata2
		Mkl1		Sec16a
		Pabpc1
		Rab11b
		Celf3
		Syne1
		Bai1
		Rpl38
		Rpl8
		Acot13
		Gm10060
		Gltscr1
		Sgta
		Chfr
		Scrt1
		Rpl10a
		Xpo6
		Atp5g2
		Rexo1
		Phf6
		Baz1b
		Rpl15
		Mbd5
		Zfp746
		Adarb1
		Sf1
		Aff4
		Dab1
		Rpl7
		Nvl
		Phb2
		Ppp1r12b
		Psmb2
		Zc3h13
		Rpl13a
		Timm9
		Fam120a
		Exd2
		Anxa6
		Tmem66
		Sec23ip
		Hmgn3
		Rpl11
		Maz
		Tnfrsf22
		Ptprj
		Sec16a
		2610301G19Rik
		2310021P13Rik
		Mdm2
		Rpl14
		Dnajb1
		Banf1
		Atp9b
		Edf1
		Srsf1
		Uqcr11
		Gm17131
		A930011O12Rik
		Rpia
		Klf9
		Wdr43
		Cdc23
		Psmd8
		Atxn7
		Tnrc6c
		Actr1b
		Brd4
		Pik3cb
		Mapkap1
		Anp32a
		Slc8a2
		Agpat3
		Ndufc2
		Nupl1
		Atp5k
		Higd2a
		Rasal2
		Pom121
		Srm
		C530028O21Rik
		BC031781
		Zfp488
		Rpl4
		Trim8
		Ado
		Cox8a
		Gmeb1
		Prr12
		Ulk1
		Pigt
		5730419I09Rik
		Coro2b
		Sfswap
		Arpp21
		Ccnl1
		Serp2
		Cbr1
		Rpl7a
		Mll1
		Ndufs8
		Rpl17
		Nfx1
		Patl1
		Ncs1
		Cpeb4
		Hint1
		Rnf19a
		H47
		Ube2h
		Plekha6
		Camk2b
		Arid1a
		Cirh1a
		Usmg5
		Zfp652
		Rpl21
		Gramd1a
		Rere
		Shank3
		Rps3
		C030046E11Rik
		Dvl3
		Tbca
		Ppia
		Gabra4
		Mll3
		Rpl36a
		Ssu72
		Grik5
		Agpat6
		Zfp664
		Eml5
		Zfand5
		Clk1
		D10Wsu102e
		Rps4x
		Bmyc
		Sez6l
		Slc6a8
		Set
		Taf9
		Sec24c
		Smg7
		Kdm6a
		Dcaf8
		Samd4b
		Ntrk3
		Psma5
		Jmjd1c
		Sp3
		Dmwd
		Atp5j
		Uqcr10
		Aebp2
		Srsf7
		Hnrnpul1
		Vps28
		Tet2
		Rpl27
		Rpl6
		Atp5l
		Fam65a
		Ncdn
		Gfod1
		Trak1
		Ubqln4
		Arglu1
		Riok3
		Aplp1
		Hmgb1
		Prmt8
		Ep300
