# Supplementary material for: Exploring the expression patterns of palmitoylating and de-palmitoylating enzymes in the mouse brain using the curated RNA-seq database BrainPalmSeq
Source: eLife. 2022 Jul 12;11:e75804. doi: 10.7554/eLife.75804 (PMC9365392; doi:10.7554/eLife.75804)
Supplement: Figure 3—figure supplement 1—source data 1. [file elife-75804-fig3-figsupp1-data1.xlsx]

## Sheet: Sheet1
Figure 3-figure supplement 1-source data 1 (Figure 3-figure supplement 1A). Expression of Zdhhcs in cortical neurons across studies.
Zeisel et al 2015									MouseBrain'								DropViz posterior cortex								Allen Brain 10X genomics
	PyrL23 S1	PyrL4 S1	PyrL5 S1	PyrL5a S1	PyrL6 S1	PyrL6b S1				Cortical pyramidal layer 2/3	Cortical pyramidal layer 4	Cortical pyramidal layer 5	Cortex pyramidal layer 6	Cortex pyramidal layer 6b				Layer 2/3	Layer 4	Layer 5a	Layer 5b	Layer 6 av			Cell.Type	Cortex L2/3	Cortex L4	Cortex L4/5	Cortex L5	Cortex L5/6	Cortex L6
Zdhhc1	0.106527	0.108929	0.303249	0.147368	0.119537	0.136251			Zdhhc1	0.0714526	0.087437	0.109276	0.0894819	0.0978888			Zdhhc1	0.186256	0.198289	0.24629	0.223526	0.231696			Zdhhc1	1.31616	0.531798	1.20656	1.45338	1.14266	1.19326
Zdhhc2	0.381383	0.888452	0.435728	0.727522	0.398839	0.376679			Zdhhc2	0.252504	0.776276	0.474331	0.409682	0.615114			Zdhhc2	0.847089	1.53378	1.07512	0.747734	0.810739			Zdhhc2	2.16252	4.71184	6.75235	4.74598	3.92429	4.23751
Zdhhc3	0.567256	0.617101	0.624568	0.575613	0.680686	0.424263			Zdhhc3	0.475155	0.567521	0.7288	0.58395	0.629231			Zdhhc3	0.911116	1.05371	1.00756	0.978356	0.980273			Zdhhc3	1.33566	1.72064	2.31147	3.22754	2.14985	2.15583
Zdhhc4	0.203672	0.192358	0.114165	0.192382	0.155625	0.203824			Zdhhc4	0.209634	0.148619	0.143825	0.148153	0.170637			Zdhhc4	0.172639	0.0942758	0.101987	0.110205	0.11935			Zdhhc4	0.0560354	0	0	0.0721588	0.0454386	0.00227852
Zdhhc5	0.323378	0.511274	0.291413	0.431449	0.287557	0.252061			Zdhhc5	0.104451	0.144916	0.246929	0.138753	0.177545			Zdhhc5	0.47298	0.493899	0.529415	0.505953	0.486533			Zdhhc5	0.0431876	0	0.534318	1.11059	0.46742	0.291882
Zdhhc6	0.285526	0.331469	0.217103	0.359788	0.29655	0.398119			Zdhhc6	0.268131	0.231039	0.225399	0.18935	0.198453			Zdhhc6	0.147898	0.17298	0.155945	0.169393	0.186979			Zdhhc6	1.60061	1.59439	2.15197	2.04568	1.18115	1.09922
Zdhhc7	0.227524	0.250344	0.192971	0.169078	0.116259	0.0744802			Zdhhc7	0.238596	0.208233	0.312632	0.187363	0.295407			Zdhhc7	0.327119	0.256907	0.296862	0.286174	0.297121			Zdhhc7	0.125003	0	0.355628	0.597719	0.488966	0.31511
Zdhhc8	1.31369	1.07443	0.811901	0.731319	0.68284	0.354205			Zdhhc8	0.800784	0.748035	0.722078	0.387903	0.551935			Zdhhc8	1.45637	1.2693	0.985416	0.832352	0.901531			Zdhhc8	2.63629	1.96416	3.72542	3.04078	2.34386	1.96371
Zdhhc9	0.376602	0.459472	0.249036	0.326873	0.543584	0.393137			Zdhhc9	0.146063	0.16812	0.287353	0.245122	0.492292			Zdhhc9	0.22888	0.277148	0.347388	0.347465	0.374618			Zdhhc9	0.0733828	0	0.675616	1.50137	0.664742	1.72026
Zdhhc11	0	0	0	0	0	0.0382879			Zdhhc11	0	0	0	0	0			Zdhhc11	0	0	0.00221945	0	0			Zdhhc11	0	0	0	0	0	0
Zdhhc12	0.194321	0.0223097	0.16274	0.0960019	0.208434	0.178274			Zdhhc12	0.0734709	0.0357055	0.063839	0.0915187	0.162303			Zdhhc12	0.0587727	0.0479078	0.0983326	0.123407	0.113133			Zdhhc12	0	0	0	0	0	0
Zdhhc13	0.266717	0.200665	0.283384	0.1885	0.377456	0.250805			Zdhhc13	0.143313	0.0956825	0.0828406	0.145202	0.10794			Zdhhc13	0.328212	0.249476	0.260219	0.250517	0.337699			Zdhhc13	0.855266	0	0.794863	0.674722	0.557302	0.930439
Zdhhc14	0.530734	0.177086	0.39085	0.161215	0.411454	0.10687			Zdhhc14	0.366459	0.175406	0.279737	0.17549	0.27814			Zdhhc14	0.563807	0.337972	0.240218	0.371024	0.307608			Zdhhc14	7.14889	1.72624	5.28681	4.01815	2.97521	4.30673
Zdhhc15	0.0468215	0.0760784	0.0498185	0.0528549	0.0656712	0.0382848			Zdhhc15	0.0327145	0.0322024	0.0616432	0.0374204	0.0295643			Zdhhc15	0.109086	0.0901215	0.128928	0.0924122	0.116453			Zdhhc15	0	0	0	0.11525	0	0
Zdhhc16	0.218265	0.285119	0.274401	0.214565	0.189601	0.300804			Zdhhc16	0.33643	0.319628	0.303856	0.260575	0.275007			Zdhhc16	0.279203	0.278974	0.287956	0.283562	0.256158			Zdhhc16	0.000800221	0	0.0529587	0.277719	0.0801719	0.0244717
Zdhhc17	0.923376	1.0587	1.08046	1.11439	0.79247	1.06687			Zdhhc17	0.449816	0.466076	0.740947	0.503918	0.69146			Zdhhc17	0.973354	1.17046	0.92803	1.0592	0.985856			Zdhhc17	3.85597	3.34939	4.66025	6.04133	5.14423	4.7588
Zdhhc18	0.0420997	0.0774012	0.0715002	0.0698938	0.0113327	0.0127504			Zdhhc18	0.126612	0.122545	0.230232	0.101382	0.0515587			Zdhhc18	0.320806	0.316796	0.391265	0.27307	0.288371			Zdhhc18	0.116505	0	0.24058	1.39494	0.495398	0.258399
Zdhhc19	0	0	0	0	0	0			Zdhhc19	0	0	0	0	0			Zdhhc19	0	0	0	0	0.00115607			Zdhhc19	0	0	0	0	0	0
Zdhhc20	0.704083	0.617573	0.598392	0.585166	0.522421	0.59411			Zdhhc20	0.422303	0.358308	0.455122	0.400099	0.378091			Zdhhc20	1.07474	0.913815	0.87815	0.875473	0.828846			Zdhhc20	5.14897	2.57926	4.10121	5.50844	4.40425	4.25781
Zdhhc21	1.10818	1.12008	1.3031	1.149	0.863899	1.08705			Zdhhc21	0.44087	0.501041	0.881226	0.492303	0.530029			Zdhhc21	1.20743	1.38318	1.28956	1.52154	1.25745			Zdhhc21	4.15353	3.23212	7.05965	6.82388	5.02491	5.39136
Zdhhc22	0.0123914	0	0.0408355	0	0.0392698	0.0459907			Zdhhc22	0.022847	0.0140547	0.0191513	0.0226147	0.0076407			Zdhhc22	0.0224963	0.0197913	0.0247165	0.0252278	0.049979			Zdhhc22	2.45365	2.17524	6.37131	1.49743	3.70691	4.2178
Zdhhc23	0.131966	0.0989647	0	0	0.05752	0			Zdhhc23	0.000407009	0	0.00234159	0.00615745	0			Zdhhc23	0.145003	0.0457644	0.208695	0.23303	0.174383			Zdhhc23	0.162955	0.0744919	1.21897	2.49408	0.945428	0.904036
Zdhhc24	0.260495	0.20869	0.221195	0.162424	0.0507838	0.0970921			Zdhhc24	0.0991267	0.0918885	0.109428	0.0761256	0.111772			Zdhhc24	0.189382	0.219363	0.224746	0.231676	0.164597			Zdhhc24	0	0	0	0.115568	0.0541278	0.0120681
Zdhhc25	0	0	0	0	0	0			Zdhhc25	0	0	0	0	0			Zdhhc25	0	0	0	0	0			Zdhhc25	0	0	0	0	0	0
