# Supplementary material for: Exploring the expression patterns of palmitoylating and de-palmitoylating enzymes in the mouse brain using the curated RNA-seq database BrainPalmSeq
Source: eLife. 2022 Jul 12;11:e75804. doi: 10.7554/eLife.75804 (PMC9365392; doi:10.7554/eLife.75804)
Supplement: Figure 3—figure supplement 1—source data 2. [file elife-75804-fig3-figsupp1-data2.xlsx]

## Sheet: Sheet1
Figure 3 - Figure suplement 1 - Source data 2: ISH images used from Allan Brain Atlas (https://mouse.brain-map.org/)
Allen Brain ISH references
Gene	Figure	Image series
Zdhhc2	S2B	70598366
Zdhhc8	S2B	71211359
Zdhhc14	S2B	69262111
Zdhhc17	S2B	70303468
