# Supplementary material for: Exploring the expression patterns of palmitoylating and de-palmitoylating enzymes in the mouse brain using the curated RNA-seq database BrainPalmSeq
Source: eLife. 2022 Jul 12;11:e75804. doi: 10.7554/eLife.75804 (PMC9365392; doi:10.7554/eLife.75804)
Supplement: Figure 3—source data 1. [file elife-75804-fig3-data1.xlsx]

## Sheet: Sheet1
Figure 3 - Source data 1 (Figure 3A, B) Zdhhc expression cortical layers 'Zeisel et al 2015'.
Units: mean log2(counts per 10,000 + 1)
	Zdhhc1	Zdhhc2	Zdhhc3	Zdhhc4	Zdhhc5	Zdhhc6	Zdhhc7	Zdhhc8	Zdhhc9	Zdhhc11	Zdhhc12	Zdhhc13	Zdhhc14	Zdhhc15	Zdhhc16	Zdhhc17	Zdhhc18	Zdhhc19	Zdhhc20	Zdhhc21	Zdhhc22	Zdhhc23	Zdhhc24	Zdhhc25
PyrL23 S1	0.106527	0.381383	0.567256	0.203672	0.323378	0.285526	0.227524	1.31369	0.376602	0	0.194321	0.266717	0.530734	0.0468215	0.218265	0.923376	0.0420997	0	0.704083	1.10818	0.0123914	0.131966	0.260495	0
PyrL4 S1	0.108929	0.888452	0.617101	0.192358	0.511274	0.331469	0.250344	1.07443	0.459472	0	0.0223097	0.200665	0.177086	0.0760784	0.285119	1.0587	0.0774012	0	0.617573	1.12008	0	0.0989647	0.20869	0
PyrL5 S1	0.303249	0.435728	0.624568	0.114165	0.291413	0.217103	0.192971	0.811901	0.249036	0	0.16274	0.283384	0.39085	0.0498185	0.274401	1.08046	0.0715002	0	0.598392	1.3031	0.0408355	0	0.221195	0
PyrL5a S1	0.147368	0.727522	0.575613	0.192382	0.431449	0.359788	0.169078	0.731319	0.326873	0	0.0960019	0.1885	0.161215	0.0528549	0.214565	1.11439	0.0698938	0	0.585166	1.149	0	0	0.162424	0
PyrL6 S1	0.119537	0.398839	0.680686	0.155625	0.287557	0.29655	0.116259	0.68284	0.543584	0	0.208434	0.377456	0.411454	0.0656712	0.189601	0.79247	0.0113327	0	0.522421	0.863899	0.0392698	0.05752	0.0507838	0
PyrL6b S1	0.136251	0.376679	0.424263	0.203824	0.252061	0.398119	0.0744802	0.354205	0.393137	0.0382879	0.178274	0.250805	0.10687	0.0382848	0.300804	1.06687	0.0127504	0	0.59411	1.08705	0.0459907	0	0.0970921	0
