# Supplementary material for: Exploring the expression patterns of palmitoylating and de-palmitoylating enzymes in the mouse brain using the curated RNA-seq database BrainPalmSeq
Source: eLife. 2022 Jul 12;11:e75804. doi: 10.7554/eLife.75804 (PMC9365392; doi:10.7554/eLife.75804)
Supplement: Figure 3—source data 2. [file elife-75804-fig3-data2.xlsx]

## Sheet: Sheet1
Figure 3 - Source data 2 (Figure 3C). Allen Brain 10X mouse dataset (Yao et al., 2021). Zdhhc expression by excitatory neuron (subtype mean).
Units: trimmed mean (25%-75%) Log2(CPM+1)
Cell.Type	Glu: Agranular insular	Glu: Area prostriata	Glu: CA1	Glu: CA2	Glu: CA3	Glu: Cajal-Retzius cells	Glu: Car3	Glu: Cortex L2/3	Glu: Cortex L4	Glu: Cortex L4/5	Glu: Cortex L5	Glu: Cortex L5/6	Glu: Cortex L6	Glu: Dentate Gyrus mossy cells	Glu: DG granule cells	Glu: Entorhinal area	Glu: Hippocampo-amygdalar transition area	Glu: Retrohippocampal region	Glu: Retrosplenial	Glu: Retrosplenial/Anterior cingulate	Glu: Subiculum	Glu: Temporal association/perirhinal/ectorhinal
Zdhhc1	0.483591	0.0784545	0.398211	0.799394	0.465593	0.817644	1.29206	1.31616	0.531798	1.20656	1.45338	1.14266	1.19326	0.943093	0.181394	0.378812	0.731893	0.209089	0.138761	0.702807	0.334733	0.972453
Zdhhc2	3.53499	1.62963	4.77381	0	0.800306	0	4.54537	2.16252	4.71184	6.75235	4.74598	3.92429	4.23751	0.885585	0.702891	4.33159	2.41528	7.52258	3.62135	2.55805	3.72789	3.4633
Zdhhc3	1.86597	0.573943	1.70383	1.45768	2.13561	0	2.02398	1.33566	1.72064	2.31147	3.22754	2.14985	2.15583	1.64276	0.143946	2.20249	1.56785	1.37907	2.0269	2.10344	1.59839	2.03772
Zdhhc4	0	0	0.0469697	0	0.354511	0	0	0.0560354	0	0	0.0721588	0.0454386	0.00227852	0	0	0.0130154	0	0	1.142	0	0.0107372	0.00426408
Zdhhc5	0.596053	0	0.212284	0	0.406485	0	0.080176	0.0431876	0	0.534318	1.11059	0.46742	0.291882	0	0	0.345764	0.0773732	0	1.41962	0.0891197	0.234603	0.350152
Zdhhc6	0.563415	1.16898	1.33404	0.593333	1.55233	0	1.60355	1.60061	1.59439	2.15197	2.04568	1.18115	1.09922	1.63395	0.260345	1.00895	1.23536	0.491236	2.28918	1.60655	0.999772	1.44078
Zdhhc7	0.772872	0	0.157717	0	0.684104	0	0.279302	0.125003	0	0.355628	0.597719	0.488966	0.31511	0.426334	0	0.296858	0.270951	0	0.0747463	0	0.100275	0.55112
Zdhhc8	3.15061	0.0876322	0.536325	1.60909	1.43222	0	3.08456	2.63629	1.96416	3.72542	3.04078	2.34386	1.96371	0.243524	0.176385	2.29758	1.33347	0.616722	1.0593	1.83274	0.596934	1.96197
Zdhhc9	0.133963	0	0.1775	0	0.573682	0	0.70356	0.0733828	0	0.675616	1.50137	0.664742	1.72026	0	0	0.657777	0.529188	2.02469	0.322899	0.287732	0.184403	1.00906
Zdhhc11	0	0	0	0	0	0	0	0	0	0	0	0	0	0	0	0	0	0	0	0	0	0
Zdhhc12	0	0	0	0	0	0	0	0	0	0	0	0	0	0	0	0	0	0	0	0	0	0
Zdhhc13	0.358965	0	0.344835	0	1.01407	0	0.621664	0.855266	0	0.794863	0.674722	0.557302	0.930439	0.107067	0	0.632882	0.493892	0.220465	0.124942	0.098124	0.204909	0.712569
Zdhhc14	5.45622	3.1236	6.42698	1.00616	5.61664	0	7.99792	7.14889	1.72624	5.28681	4.01815	2.97521	4.30673	7.59238	1.39292	5.27028	5.93713	0.542851	0.664059	2.6133	2.50997	6.46185
Zdhhc15	0	0	0.0143421	0	0.253424	0	0	0	0	0	0.11525	0	0	0	0	0	0	0	0	0	0.0190893	0
Zdhhc16	0.436053	0	0.00279167	0	0.251401	0	0.00784802	0.000800221	0	0.0529587	0.277719	0.0801719	0.0244717	0	0	0.00778456	0	0	0.0880464	0	0.0152299	0.00429526
Zdhhc17	3.42151	2.13451	4.00589	2.0849	5.539	0	4.80743	3.85597	3.34939	4.66025	6.04133	5.14423	4.7588	4.84146	0.947773	4.33569	4.4718	4.72527	3.7013	3.55668	4.22017	4.34333
Zdhhc18	1.03474	0	0.306154	0	0.459517	0	0.224521	0.116505	0	0.24058	1.39494	0.495398	0.258399	0	0.14821	0.353505	0.262084	0.0212747	0.203042	0	0.258923	0.459032
Zdhhc19	0	0	0	0	0	0	0	0	0	0	0	0	0	0	0	0	0	0	0	0	0	0
Zdhhc20	4.97634	2.38584	5.65552	2.5515	5.69757	1.78779	4.96306	5.14897	2.57926	4.10121	5.50844	4.40425	4.25781	6.91554	2.28723	4.10566	5.03965	2.17347	1.70368	2.87146	4.11008	4.65536
Zdhhc21	4.86137	1.43536	2.84271	2.1996	4.20346	0	5.22104	4.15353	3.23212	7.05965	6.82388	5.02491	5.39136	4.71101	1.74491	4.27001	3.64488	3.10282	3.62362	4.24997	2.80755	5.53745
Zdhhc22	5.24122	0.117949	0	0	0	0.941435	1.38647	2.45365	2.17524	6.37131	1.49743	3.70691	4.2178	0	0	3.65488	3.30264	1.08693	1.63402	2.27942	0.625338	2.95229
Zdhhc23	1.52632	0	1.74635	2.09626	3.70069	0	0	0.162955	0.0744919	1.21897	2.49408	0.945428	0.904036	2.29866	0	1.50348	0.488431	1.55111	1.2618	2.02202	1.15405	0.643335
Zdhhc24	0	0	0	0	0.0988304	0	0	0	0	0	0.115568	0.0541278	0.0120681	0	0	0.042743	0	0	0.0592741	0	0	0
Zdhhc25	0	0	0	0	0	0	0	0	0	0	0	0	0	0	0	0	0	0	0	0	0	0
