# Supplementary material for: Exploring the expression patterns of palmitoylating and de-palmitoylating enzymes in the mouse brain using the curated RNA-seq database BrainPalmSeq
Source: eLife. 2022 Jul 12;11:e75804. doi: 10.7554/eLife.75804 (PMC9365392; doi:10.7554/eLife.75804)
Supplement: Figure 3—source data 3. [file elife-75804-fig3-data3.xlsx]

## Sheet: Sheet1
Figure 3 - Source data 3 (Figure 3D). Allen Brain 10X mouse dataset (Yao et al., 2021). Zdhhc expression by inhibitory neuron (subtype mean).
Units: trimmed mean (25%-75%) Log2(CPM+1)
Cell.Type	GABA: Lamp5	GABA: Meis2	GABA: Ndnf	GABA: Pax6	GABA: Pvalb	GABA: Sncg	GABA: Sst	GABA: Sst Chodl	GABA: Vip
Zdhhc1	0.472104	0.685185	0.521117	0.378581	0.87255	1.01873	0.675587	0.550118	0.0831586
Zdhhc2	3.67136	1.94252	5.52867	3.85598	5.01509	6.34977	6.22753	4.66677	2.53242
Zdhhc3	1.26089	0.297615	2.20086	1.74131	1.93177	2.31924	1.80609	1.15778	0.563927
Zdhhc4	0	0	0	0	0	0	0	0	0
Zdhhc5	0	0	0.651156	0	0.401165	0.311668	0.235182	0	0
Zdhhc6	0.283159	0.742949	0.889247	0.879463	1.01335	0.9415	0.794274	0.938767	0.0445498
Zdhhc7	0	0	0.0182957	0	0.0245088	0.0409094	0.00650595	0	0
Zdhhc8	0.213037	0	1.09181	0.546028	0.793	1.52059	0.752279	0.651174	0.0153533
Zdhhc9	0.00516532	0	0.148749	0	0.14938	0.482213	0.176256	0.258775	0
Zdhhc11	0	0	0	0	0	0	0	0	0
Zdhhc12	0	0	0	0	0	0	0	0	0
Zdhhc13	0.047057	0	0.260282	0	0	0.493631	0.0505601	0	0
Zdhhc14	1.0048	0.630148	0.98987	2.8466	2.39034	3.22343	0.812387	4.74334	0.300549
Zdhhc15	0	0	0	0	0	0	0.0184694	0	0
Zdhhc16	0	0	0	0	0	0.0223893	0	0	0
Zdhhc17	2.40238	2.01614	3.94772	3.05344	4.16976	4.30064	3.59679	3.36949	1.98708
Zdhhc18	0	0	0.250445	0	0.300749	0	0.223984	0.0941552	0
Zdhhc19	0	0	0	0	0	0	0	0	0
Zdhhc20	2.56734	1.95057	3.29997	3.19666	3.35671	4.34877	3.96646	5.91125	2.675
Zdhhc21	3.10951	1.31153	6.25064	7.1951	4.23836	4.52417	3.24131	3.20122	2.17693
Zdhhc22	0.267802	0	1.27171	0.337412	0.355495	3.17454	1.79828	2.2133	0.36211
Zdhhc23	0	0	0	0	0	0	0	0	0
Zdhhc24	0	0	0	0	0	0.0531498	0	0	0
Zdhhc25	0	0	0	0	0	0	0	0	0
