# Supplementary material for: Exploring the expression patterns of palmitoylating and de-palmitoylating enzymes in the mouse brain using the curated RNA-seq database BrainPalmSeq
Source: eLife. 2022 Jul 12;11:e75804. doi: 10.7554/eLife.75804 (PMC9365392; doi:10.7554/eLife.75804)
Supplement: Figure 4—figure supplement 1—source data 1. [file elife-75804-fig4-figsupp1-data1.xlsx]

## Sheet: Sheet1
Figure 4 - Figure supplement 1 - source data 1. De-palmitoylating enzyme and Zdhhc accessory expression (cell type mean) DropViz .
	Astrocyte	Choroid Plexus	Endothelial Stalk	Endothelial Tip	Ependymal	Macrophage	Microglia	Mitotic	Mural	Neurogenesis	Oligodendrocyte	OPC (polydendroctye)	Neuron: Cerebellum	Neuron: Entopeduncular nucleus & subthalamic nucleus	Neuron: Frontal Cortex	Neuron: Globus pallidus externus & nucleus basalis	Neuron: Hippocampus	Neuron: Posterior Cortex	Neuron: Substantia nigra & Ventral tegmental area	Neuron: Striatum	Neuron: Thalamus
Lypla1	0.357258	0.563918	0.661999	0.440846	0.341431	0.311806	0.390479	0.747703	0.613703	0.427259	0.129092	0.208297	0.49902	0.405953	0.326661	0.29734	0.353327	0.319977	0.363569	0.2506	0.400209
Lypla2	0.479018	0.389749	0.533617	0.386401	1.17355	0.597975	0.463007	0.421758	0.385642	0.612379	0.243018	0.516713	0.873808	0.786133	0.650428	0.764149	0.744521	0.599376	0.873804	0.538883	0.817206
Ppt1	1.18076	1.04417	0.734045	0.985345	0.798948	1.55669	1.69964	1.60281	0.948238	0.426771	1.10873	1.39815	0.857002	1.13921	1.0706	1.10821	1.04613	1.08299	1.09175	1.02549	1.06631
Abhd4	1.26643	0.389207	0.509619	0.435836	0.759053	0.349567	0.347555	0.421758	0.488715	0.417353	1.11524	0.918368	0.118391	0.111663	0.0447573	0.0961769	0.0670895	0.045413	0.0879001	0.0542002	0.0851626
Abhd6	1.01139	0.784478	0.575323	0.205222	0.506615	0.784194	1.04565	1.23771	0.159223	0.278167	0.455564	0.641289	0.813633	0.526569	0.737689	0.609161	0.841463	0.781521	0.464231	0.640746	0.636875
Abhd10	0.469533	0.20539	0.286225	0.295515	0.417435	0.169727	0.188478	0	0.353931	0.696516	0.200676	0.315287	0.491319	0.276756	0.224505	0.283712	0.273652	0.22115	0.367751	0.278192	0.327745
Abhd11	0.510394	0.406889	0.212532	0.282069	0.17291	0.233105	0.181222	0	0.106827	0.478525	0.261836	0.338795	0.304984	0.291487	0.260996	0.311662	0.301457	0.248913	0.359465	0.352634	0.285482
Abhd12	1.23069	0.750469	0.415318	0.72053	0.452515	2.38846	2.61641	0.747703	0.405384	0.646798	1.19116	1.52892	1.50337	1.51725	1.51585	1.57431	1.60667	1.46706	1.63412	1.48577	1.28474
Abhd13	0.34888	0.186935	0.351388	0.261455	0.252724	0.257468	0.306702	1.43178	0.349794	0.230682	0.198616	0.374521	0.445273	0.396439	0.551807	0.447966	0.499579	0.537423	0.386368	0.469913	0.530578
Abhd16a	0.711584	0.437221	0.839349	0.881272	0.681303	0.499055	0.526878	1.60281	0.785367	0.430508	0.72213	0.97525	1.24575	0.655973	0.709285	0.628922	0.783893	0.660927	0.701821	0.784382	0.522968
Abhd17a	0.823823	0.564628	1.24542	0.770711	0.594738	0.836037	0.696536	0.747703	0.953551	0.776977	1.27415	1.07773	0.928119	0.999343	1.00024	0.905107	1.01468	0.967364	1.05019	0.933034	0.931004
Abhd17b	1.12027	0.448439	0.522612	0.444066	0.633912	0.679263	0.529586	0.747703	0.444201	0.814845	1.92582	2.27663	1.23011	0.861577	0.888399	0.959618	0.950613	0.911032	0.97903	0.79466	0.884647
Abhd17c	0.280887	0	0.216758	0.325061	0.314463	0.248533	0.552792	0	0.080114	0.332223	0.157924	0.299367	0.178671	0.228105	0.250857	0.263822	0.307326	0.235779	0.168564	0.234358	0.119081
	Astrocyte	Choroid Plexus	Endothelial Stalk	Endothelial Tip	Ependymal	Macrophage	Microglia	Mitotic	Mural	Neurogenesis	Oligodendrocyte	OPC (polydendroctye)	Neuron: Cerebellum	Neuron: Entopeduncular nucleus & subthalamic nucleus	Neuron: Frontal Cortex	Neuron: Globus pallidus externus & nucleus basalis	Neuron: Hippocampus	Neuron: Posterior Cortex	Neuron: Substantia nigra & Ventral tegmental area	Neuron: Striatum	Neuron: Thalamus
Golga7	0.388298	0.186935	0.386613	0.235883	0.222623	0.170142	0.191482	0.747703	0.327576	0.420441	1.27164	1.00599	0.250176	0.175454	0.14065	0.100565	0.158645	0.145748	0.122587	0.155851	0.112195
Golga7b	0.0949639	0	0.0495684	0.0816995	0.0219005	0.0556414	0.207908	0	0.059133	0.0984844	0.0608193	0.0673447	0.707956	0.827536	0.878129	0.97118	0.835573	0.97058	0.982979	0.576607	0.727351
Selenok	2.31069	2.33915	2.33175	2.04947	1.89111	1.90756	1.65054	2.24341	2.4044	2.29731	2.94431	2.81462	2.14268	1.36808	1.56232	1.13527	1.89002	1.53442	1.28585	2.05538	1.2481
