# Supplementary material for: Exploring the expression patterns of palmitoylating and de-palmitoylating enzymes in the mouse brain using the curated RNA-seq database BrainPalmSeq
Source: eLife. 2022 Jul 12;11:e75804. doi: 10.7554/eLife.75804 (PMC9365392; doi:10.7554/eLife.75804)
Supplement: Figure 4—figure supplement 3—source data 1. [file elife-75804-fig4-figsupp3-data1.xlsx]

## Sheet: Sharma Isolated cell proteomics
Figure 4 - Figure supplement 3 - Source data 1
Calculation of cell type z-scores from Rosenberg RNAseq and Sharma proteomics
Log2 LFQ from Sharma et al 2015 Supplementary Table 2								Log2 LFQ z-score
Gene names	Isolated Astrocytes	Isolated Microglia	Isolated Neurons	Isolated Oligodendrocytes	Mean	SD		cell.type	Astrocyte	Microglia	Neuron	Oligodendrocyte
Zdhhc3	27.73	28.27	28.37	27.87	28.06	0.308329		Zdhhc3	-1.07029	0.681091	1.00542	-0.616225
Zdhhc13	28	28.32	28.33	27.73	28.095	0.287576		Zdhhc13	-0.330347	0.782402	0.817175	-1.26923
Zdhhc17	29.83	29.14	30.49	30.3	29.94	0.601166		Zdhhc17	-0.182978	-1.33075	0.914889	0.598837
Abhd4	31.17	28.53	27.65	30.02	29.3425	1.56242		Abhd4	1.16966	-0.520026	-1.08326	0.433622
Abhd6	31.24	29.34	30.49	30.61	30.42	0.791581		Abhd6	1.0359	-1.36436	0.0884307	0.240026
Abhd10	29.47	28.43	30.06	29.39	29.3375	0.674753		Abhd10	0.196368	-1.34494	1.07076	0.0778062
Abhd12	33.28	34.51	32.28	32.96	33.2575	0.933323		Abhd12	0.0241074	1.34198	-1.04733	-0.318754
Abhd13	25.41	27.23	28.08	27.58	27.075	1.16351		Abhd13	-1.43101	0.133217	0.863762	0.43403
Abhd16a	30.36	29.53	30.62	30.22	30.1825	0.465502		Abhd16a	0.381309	-1.40171	0.939847	0.0805583
Abhd17b	29.23	27.33	26.38	29.86	28.2	1.6213		Abhd17b	0.635294	-0.536608	-1.12256	1.02387
Golga7	26.98	27.6	25.9	28.31	27.1975	1.02151		Golga7	-0.212919	0.394023	-1.27017	1.08907
Lypla1	30.23	30.28	29.24	29.39	29.785	0.546535		Lypla1	0.814221	0.905707	-0.997192	-0.722736
Lypla2	31.3	31.73	31.08	31.32	31.3575	0.271093		Lypla2	-0.212104	1.37406	-1.02363	-0.138329
Ppt1	31.97	33.23	31.35	31.33	31.97	0.890992		Ppt1	3.98737e-15	1.41415	-0.695854	-0.718301

## Sheet: Rosenberg single cell RNAseq
Figure 4 - Figure supplement 3 - Source data 1
Calculation of cell type z-scores from Rosenberg RNAseq and Sharma proteomics
Rosenberg Cell type average designation					Rosenberg cell type expression (mean log2(counts per 10,000 + 1))								Rosenberg z-score
Metacell ID	Cell-type	Classification for proteome comparison			gene	Astrocyte	Microglia	Neuron	Oligodendrocyte	Mean	SD		gene	Astrocyte	Microglia	Neuron	Oligodendrocyte
1_OB Mit/Tuft	Neuron olfactory bulb	Neuron			Zdhhc3	0.0900312	0.0969051	0.139847	0.134698	0.11537	0.0255323		Zdhhc3	-0.992431	-0.72321	0.958663	0.756977
2_OB Mit/Tuft	Neuron olfactory bulb	Neuron			Zdhhc13	0.0740893	0.0832499	0.114189	0.0692099	0.0851845	0.0201932		Zdhhc13	-0.549454	-0.0958039	1.43635	-0.79109
3_OB Mit/Tuft	Neuron olfactory bulb	Neuron			Zdhhc17	0.316896	0.208603	0.457371	0.384329	0.3418	0.105715		Zdhhc17	-0.235576	-1.25996	1.09324	0.402299
4_MSN	Neuron striatum	Neuron			Abhd4	0.0414879	0.0231821	0.00982656	0.0163734	0.0227175	0.01365		Abhd4	1.37512	0.0340373	-0.944391	-0.464768
5_CTX L2/3	Neuron cortex	Neuron			Abhd6	0.107243	0.103195	0.169174	0.0712152	0.112707	0.0409488		Abhd6	-0.133439	-0.232276	1.37897	-1.01325
6_CTX L2/3/4	Neuron cortex	Neuron			Abhd10	0.0993131	0.0410709	0.0552836	0.0559772	0.0629112	0.0252214		Abhd10	1.44329	-0.865943	-0.302426	-0.274925
7_CTX L2/3	Neuron cortex	Neuron			Abhd12	0.359813	1.68851	0.311891	0.414527	0.693685	0.66454		Abhd12	-0.50241	1.49701	-0.574524	-0.420077
8_CTX L4	Neuron cortex	Neuron			Abhd13	0.0142111	0.0176755	0.0310539	0.0115344	0.0186187	0.0086629		Abhd13	-0.508792	-0.108882	1.43545	-0.817777
9_CTX L2/3/4	Neuron cortex	Neuron			Abhd16a	0.04938	0.0378422	0.0884733	0.12405	0.0749365	0.0392621		Abhd16a	-0.650919	-0.944785	0.344781	1.25092
10_CTX L4	Neuron cortex	Neuron			Abhd17b	0.229244	0.160548	0.156383	0.664623	0.302699	0.243584		Abhd17b	-0.301562	-0.583581	-0.600682	1.48582
11_CTX L4/L5	Neuron cortex	Neuron			Golga7	0.0318403	0.0432831	0.0384048	0.143688	0.064304	0.0531299		Golga7	-0.611026	-0.395652	-0.487471	1.49415
12_CTX L5	Neuron cortex	Neuron			Lypla1	0.128352	0.0847884	0.0670322	0.0978746	0.0945119	0.0258596		Lypla1	1.30862	-0.37601	-1.06265	0.130039
13_CTX L5	Neuron cortex	Neuron			Lypla2	0.0226661	0.0248295	0.0198031	0.0195494	0.021712	0.00251329		Lypla2	0.379626	1.24039	-0.75954	-0.860475
14_CTX L6a	Neuron cortex	Neuron			Ppt1	0.0951879	0.191544	0.153916	0.100387	0.135259	0.0459632		Ppt1	-0.871798	1.22458	0.405911	-0.758691
15_CTX L5/6	Neuron cortex	Neuron
16_CTX L5/6	Neuron cortex	Neuron
17_CTX L6	Neuron cortex	Neuron
18_CLAU	Neuron cortex	Neuron
19_MTt	Neuron rostral midbrain	Neuron
20_THAL	Neuron thalamus	Neuron
21_THAL In inter	Neuron thalamus	Neuron
22_Purk	Neuron cerebellum	Neuron
23_Purk	Neuron cerebellum	Neuron
24_CB Int Prog	Neuron cerebellum	Neuron
25_CB Gran pre	Neuron cerebellum	Neuron
26_CB Int	Neuron cerebellum	Neuron
27_CB Int	Neuron cerebellum	Neuron
28_CB Gran	Neuron cerebellum	Neuron
29_CB Int pre	Neuron cerebellum	Neuron
30_MD Glyc int	Neuron medulla	Neuron
31_MD Int	Neuron medulla	Neuron
32_Nigral DA	Neuron basal ganglia	Neuron
33_HIPP Pyr	Neuron hippocampus	Neuron
34_SUB	Neuron hippocampus	Neuron
35_HIPP Pyr	Neuron hippocampus	Neuron
36_HIPP Gran	Neuron hippocampus	Neuron
37_HIPP Pyr Pre	Neuron hippocampus	Neuron
38_HIPP Pyr	Neuron hippocampus	Neuron
39_HIPP Gran	Neuron hippocampus	Neuron
40_HIPP CA3	Neuron hippocampus	Neuron
41_HIPP Pyr	Neuron hippocampus	Neuron
42_SC Glut	Neuron spinal cord	Neuron
43_SC Glut	Neuron spinal cord	Neuron
44_Mig Int	Neuron migrating interneuron	Neuron
45_Mig Int	Neuron migrating interneuron	Neuron
46_Mig Int	Neuron migrating interneuron	Neuron
47_Mig Int	Neuron migrating interneuron	Neuron
48_Mig Int	Neuron migrating interneuron	Neuron
49_Mig Int	Neuron migrating interneuron	Neuron
50_Mig Int	Neuron migrating interneuron	Neuron
51_SVZ Stem	Neuron other	Neuron
52_Cajal-Retzi	Neuron other	Neuron
53_Unresol	Neuron other	Neuron
54_Unresol	Neuron other	Neuron
55_Oligo	Oligodendrocyte	Oligodendrocyte
56_Oligo	Oligodendrocyte	Oligodendrocyte
57_Oligo	Oligodendrocyte	Oligodendrocyte
58_Oligo	Oligodendrocyte	Oligodendrocyte
59_Oligo	Oligodendrocyte	Oligodendrocyte
60_Oligo	Oligodendrocyte	Oligodendrocyte
61_OPC	OPC	NA
62_Macr	Immune	NA
63_Micro	Immune	Microglia
64_Endo	Vasculature	NA
65_SMC	Vasculature	NA
66_VLMC	VLMC	NA
67_VLMC	VLMC	NA
68_Astro	Astrocyte	Astrocyte
69_Astro	Astrocyte	Astrocyte
70_Astro	Astrocyte	Astrocyte
71_Ber Glia	Astrocyte	Astrocyte
72_Epen	Ependyma	NA
73_OEC	Schwann Cells	NA
