# Supplementary material for: Exploring the expression patterns of palmitoylating and de-palmitoylating enzymes in the mouse brain using the curated RNA-seq database BrainPalmSeq
Source: eLife. 2022 Jul 12;11:e75804. doi: 10.7554/eLife.75804 (PMC9365392; doi:10.7554/eLife.75804)
Supplement: Figure 4—source data 1. [file elife-75804-fig4-data1.xlsx]

## Sheet: BPSmatrix_Zeisel2018_CellType
Figure 4 - Source data 1 (Figure 4A) Depalmitoylating enzyme and Zdhhc accessory protein expression from 'MouseBrain' dataset
Index	1	2	3	4	5	6	7	8	9	10	11	12	13	14	15	16	17	18	19	20	21	22	23	24	25	26	27	28	29	30	31	32	33	34	35	36	37	38	39	40	41	42	43	44	45	46	47	48	49
Cell Type	Telencephalon projecting excitatory neurons	Telencephalon projecting excitatory neurons	Telencephalon projecting excitatory neurons	Telencephalon projecting excitatory neurons	Telencephalon projecting excitatory neurons	Telencephalon projecting excitatory neurons	Telencephalon projecting excitatory neurons	Telencephalon projecting excitatory neurons	Telencephalon projecting excitatory neurons	Telencephalon projecting excitatory neurons	Telencephalon projecting excitatory neurons	Telencephalon projecting excitatory neurons	Telencephalon projecting excitatory neurons	Telencephalon projecting excitatory neurons	Telencephalon projecting excitatory neurons	Telencephalon projecting excitatory neurons	Telencephalon projecting excitatory neurons	Telencephalon projecting excitatory neurons	Telencephalon projecting excitatory neurons	Telencephalon projecting excitatory neurons	Telencephalon projecting excitatory neurons	Telencephalon projecting excitatory neurons	Telencephalon projecting excitatory neurons	Telencephalon projecting excitatory neurons	Dentate gyrus granule neurons	Dentate gyrus granule neurons	Telencephalon projecting inhibitory neurons	Telencephalon projecting inhibitory neurons	Telencephalon projecting inhibitory neurons	Telencephalon projecting inhibitory neurons	Telencephalon projecting inhibitory neurons	Telencephalon projecting inhibitory neurons	Non-glutamatergic neuroblasts	Non-glutamatergic neuroblasts	Non-glutamatergic neuroblasts	Non-glutamatergic neuroblasts	Non-glutamatergic neuroblasts	Olfactory inhibitory neurons	Olfactory inhibitory neurons	Olfactory inhibitory neurons	Olfactory inhibitory neurons	Olfactory inhibitory neurons	Olfactory inhibitory neurons	Olfactory inhibitory neurons	Olfactory inhibitory neurons	Olfactory inhibitory neurons	Telencephalon inhibitory interneurons	Telencephalon inhibitory interneurons	Telencephalon inhibitory interneurons
Class	Neurons	Neurons	Neurons	Neurons	Neurons	Neurons	Neurons	Neurons	Neurons	Neurons	Neurons	Neurons	Neurons	Neurons	Neurons	Neurons	Neurons	Neurons	Neurons	Neurons	Neurons	Neurons	Neurons	Neurons	Neurons	Neurons	Neurons	Neurons	Neurons	Neurons	Neurons	Neurons	Neurons	Neurons	Neurons	Neurons	Neurons	Neurons	Neurons	Neurons	Neurons	Neurons	Neurons	Neurons	Neurons	Neurons	Neurons	Neurons	Neurons
Region	Cortex	Cortex	Cortex	Cortex	Cortex	Cortex	Cortex	Cortex	Cortex	Cortex	Cortex	Cortex	Cortex	Cortex	Cortex	Cortex	Cortex	Cortex	Cortex	Amygdala	Hippocampus	Cortex	Hippocampus	Hippocampus	Dentate gyrus	Dentate gyrus	Striatum dorsal	Striatum dorsal	Striatum ventral	Striatum ventral	Striatum ventral	Striatum ventral	Thalamus	Dentate gyrus	Dentate gyrus	Striatum dorsal, Striatum ventral, Dentate gyrus	Olfactory bulb	Olfactory bulb	Olfactory bulb	Olfactory bulb	Olfactory bulb	Olfactory bulb	Olfactory bulb	Olfactory bulb	Olfactory bulb	Olfactory bulb	Thalamus	Thalamus	Hippocampus,Cortex
Probable location	Cingulate/Retrosplenial area, layer 6	Cortex pyramidal layer 6	Cortex pyramidal layer 6b	Cortex pyramidal layer 6	Cortical pyramidal (poor markers)	Lateral cortex layer 6: gustatory, barrel field, auditory	Cortical pyramidal layer 5	Cingulate/Retrosplenial area, layer 5	Cortical pyramidal layer 4	Cortical pyramidal layer 2/3	Cingulate/Retrosplenial area, layer 2	Subiculum	Subiculum	Entorhinal superficial layers	Piriform pyramidal	Piriform pyramidal	Piriform pyramidal	Anterior olfactory nucleus, deep layer	Anterior olfactory nucleus and ventral striatum	Basolateral amygdala	CA1 (posterior),subiculum,entorhinal	Cortex pyramidal layer 5, Cingulate/Retrosplenial area (superficial and deep)	CA1	CA3	Dentate gyrus	Dentate gyrus	Striatum dorsal	Striatum dorsal	Striatum ventral	Striatum ventral	Striatum ventral	Striatum ventral	Medial habenula	Dentate gyrus	Dentate gyrus	Sub ventricular zone, Dentate gyrus	Olfactory bulb	Main and accessory olfactory bulb granular layer	Olfactory bulb	Olfactory bulb, mitral cell layer	Accessory olfactory bulb granular layer	Olfactory bulb, inner granular layer	Main olfactory bulb, glomerular layer	Main olfactory bulb, glomerular layer and Accessory olfactory bulb, granular layer	Olfactory bulb, periglomerular layer	Olfactory bulb, outer plexiform layer	Reticular nucleus of the thalamus (Sst low)	Reticular nucleus of the thalamus	Hippocampus,Cortex
Neurotransmitter	Glutamate	Glutamate	Glutamate	Glutamate	Glutamate	Glutamate	Glutamate	Glutamate	Glutamate	Glutamate	Glutamate	Glutamate,Nitric oxide	Glutamate	Glutamate	Glutamate,Nitric oxide	Glutamate	Glutamate	Glutamate	Glutamate	Glutamate	Glutamate,Nitric oxide	Glutamate	Glutamate,Nitric oxide	Glutamate,Nitric oxide	Glutamate	Glutamate	GABA	GABA	GABA	GABA	GABA	GABA					GABA	GABA	GABA,Dopamine	GABA	GABA	GABA	GABA	GABA	GABA,Dopamine	GABA	GABA	GABA	GABA
Description	Excitatory neurons, cerebral cortex	Excitatory neurons, cerebral cortex	Excitatory neurons, cerebral cortex	Excitatory neurons, cerebral cortex	Excitatory neurons, cerebral cortex	Excitatory neurons, cerebral cortex	Excitatory neurons, cerebral cortex	Excitatory neurons, cerebral cortex	Excitatory neurons, cerebral cortex	Excitatory neurons, cerebral cortex	Excitatory neurons, cerebral cortex	Excitatory neurons, cerebral cortex	Excitatory neurons, cerebral cortex	Excitatory neurons, cerebral cortex	Excitatory neurons, cerebral cortex	Excitatory neurons, cerebral cortex	Excitatory neurons, cerebral cortex	Excitatory neurons, cerebral cortex	Excitatory neurons, cerebral cortex	Excitatory neurons, amygdala	Excitatory neurons, hippocampus CA1	Excitatory neurons, cerebral cortex	Excitatory neurons, hippocampus CA1	Excitatory neurons, hippocampus CA3	Granule neuroblasts, dentate gyrus	Granule neurons, dentate gyrus	D1 medium spiny neurons, striatum	D2 medium spiny neurons, striatum	D2 medium spiny neurons, striatum	D1 medium spiny neurons, striatum	Patch D1/D2 neurons, striatum	Matrix D1 neurons, striatum	Neuroblast-like, habenula	Granule neuroblasts, dentate gyrus	Granule neuroblasts, dentate gyrus	Neuronal intermidate progenitor cells	Neuroblasts, olfactory bulb	Inhibitory neurons, olfactory bulb	Dopaminergic neurons, olfactory nulb	Inner horizontal cell, olfactory bulb	Inhibitory neurons, olfactory bulb	Inhibitory neurons, olfactory bulb	Inhibitory neurons, olfactory bulb	Inhibitory neurons, olfactory bulb	Dopaminergic periglomerular interneuron, olfactory bulb	External plexiform layer interneuron, olfactory bulb	Inhibitory neurons, thalamus	Inhibitory neurons, thalamus	Axo-axonic, cortex/hippocampus
MarkerGenes	Myl4 Cpne4 Olfm3 Gm11549 Plcxd2 Neto2	Rprm Rell1 3110035E14Rik Tbr1 Garnl3 Ephb6	Cplx3 Nxph3 Hs3st4 Ipcef1 Mpped1 E130012A19Rik	Sulf1 Prss12 1110032F04Rik Cnih3 Ptpru Atp2b4	Igfbp6 C130074G19Rik Rasl10a Satb2 Ovol2 Lingo1	Nr4a2 Col24a1 Oprk1 B3gat2 Kcnv1 Stk32c	Hs3st2 Vipr1 Pde1a Satb2 Slc17a7 Sv2b	Dkkl1 Galntl6 Pkib Satb2 Nrep Stx1a	Krt12 Tcap A830036E02Rik Tnnc1 Ovol2 Stx1a	A830009L08Rik Gm12371 Lamp5 Calb1 Dact2 Cacng3	Tshz2 Ddit4l Neurod6 Dkk3 Hlf March1	Wfs1 RP24-134N2.1 Vwc2l Lhx2 Prkcg Sorcs3	Cbln1 Ntsr1 Htr1a Nwd2 Gsg1l Satb1	Rxfp1 Fermt1 Cbln4 Cemip Ovol2 Igfbp5	RP23-231J2.1 Dbpht2 Cdkl4 Nwd2 D630023F18Rik Trps1	Scube1 Tekt5 Fam19a2 Hrk Plcxd2 Gpr26	Trim54 Slc30a3 Lmo3 Nptxr Fam19a1 Kcnj4	Abi3bp 4930426D05Rik Ndst4 Klhl14 Rgs14 Atp2b4	Oxtr Bmp3 Ndst4 C1ql3 Crym Gm10605	Lypd1 Prss23 Kcng1 C1ql3 Myh7 Enc1	Nov 4833422C13Rik Baiap2l1 6330403A02Rik Gda Sv2b	Fezf2 RP24-134N2.1 Kcng1 Kcnf1 Galnt9 Nos1ap	Spink8 Lefty1 Neurod6 4921539H07Rik Wipf3 Rprml	Lpl Gm26644 Nr4a3 Nptx1 Rnf182 Slc26a4	Bhlhe22 Tmem114 Ntf3 Islr2 Gabra5 Prox1os	C1ql2 Nr3c2 Rasl10a Tubgcp2 Ahcyl2 Rab40b	Drd1 Ido1 Ppp1r1b Rgs9 Syndig1l Nexn	Adora2a Ido1 Penk Gpr88 Gpr6 Rasd2	Adora2a Gpr83 Penk Gpr88 Gpr6 Pde10a	Drd1 Dclk3 Mhrt Rgs9 Rem2 Pde10a	Drd1 Lrpprc Foxp2 Gpr88 Rxrg Jsrp1	Tac1 Wnt2 Isl1 Rgs9 Pcp4l1 Gpr26	Pde6g Platr17 1700042O10Rik Sag Gnb3 Rbp3	Igfbpl1 Rerg Sox11 Tubb2b Syce2 Ttc28	Igfbpl1 Mfap4 Sox11 Mdk Emx1 Rcor2	2810417H13Rik Cdca7 Rrm2 Ube2c Top2a Lockd	Igfbpl1 Tiam2 Dlx2 Dlx1 Dlx6os1 Dcx	Sp9 Ccsap Gng4 Pbx3 Tshz1 Dcx	Scgn Cpne6 Synpr Isoc1 Pcp4l1 Dcx	Shisa8 Fam184a Inpp5j Lgr5 Kank3 Syt6	Gpsm1 Col6a1 Meis2 Kcnh3 Pcp4l1 Myo16	Prok2 Trdn Inhba Ppp1r17 Kcnip2 A830018L16Rik	Nppa Nccrp1 Htr1f Id2 Nxph1 Nol4	Nppa Dlx5 Calb2 Apold1 Nxph1 Nrsn1	Trh Th Pax6 Lgr5 Syndig1l 9330158H04Rik	Crh Tcap Pgam2 Pde1c Nxph1 Pygm	Six3 St8sia4 Esrrg Lancl3 Fign AI593442	Six3 Gm2115 Esrrg Gad1 Ubash3b AI593442	Pthlh Cox6a2 Igfbp4 Erbb4 Nxph1 Kcnc1
Number of cells	402	2734	274	55	1464	386	866	202	3071	2435	598	127	35	126	61	186	784	657	89	958	104	664	2037	484	983	3385	869	1094	1247	1584	372	525	7	1445	159	971	2240	353	281	1800	786	465	208	871	371	56	339	167	675
Metacell ID	TEGLU1	TEGLU3	TEGLU2	TEGLU20	TEGLU11	TEGLU12	TEGLU10	TEGLU9	TEGLU8	TEGLU7	TEGLU6	TEGLU13	TEGLU14	TEGLU5	TEGLU16	TEGLU15	TEGLU17	TEGLU18	TEGLU19	TEGLU22	TEGLU21	TEGLU4	TEGLU24	TEGLU23	DGGRC1	DGGRC2	MSN1	MSN2	MSN3	MSN4	MSN5	MSN6	DETPH	DGNBL2	DGNBL1	SZNBL	OBNBL3	OBINH1	OBDOP2	OBINH2	OBINH3	OBINH4	OBNBL4	OBNBL5	OBDOP1	OBINH5	DEINH1	DEINH2	TEINH17
Lypla1	0.140282	0.184902	0.257243	0.0805889	0.195878	0.204925	0.190213	0.221895	0.211253	0.170208	0.221397	0.243071	0.183646	0.250316	0.287834	0.310411	0.171352	0.12589	0.162428	0.185942	0.186133	0.179054	0.115949	0.209822	0.11926	0.100931	0.0886044	0.0818983	0.0752201	0.119564	0.147257	0.0646261	0.890168	0.119148	0.159389	0.14597	0.100259	0.133916	0.187894	0.113636	0.129108	0.0933094	0.24042	0.295542	0.275867	0.13794	0.374829	0.319109	0.234246
Lypla2	0.312597	0.356388	0.450126	0.361884	0.391096	0.335868	0.487533	0.33165	0.353096	0.300881	0.230819	0.328248	0.388829	0.258706	0.397435	0.501083	0.338303	0.40489	0.382325	0.3068	0.378648	0.331227	0.589058	0.457945	0.250885	0.10363	0.297273	0.250006	0.201335	0.202614	0.199612	0.201353	0.56218	0.280046	0.322881	0.218705	0.251194	0.331262	0.253285	0.256393	0.20423	0.208801	0.167519	0.275742	0.894851	0.334546	0.283481	0.256931	0.330148
Ppt1	0.563962	0.563286	0.571688	0.506659	0.57138	0.561742	0.740061	0.641059	0.664229	0.629224	0.685446	0.746625	1.02111	0.823287	0.419265	0.70071	0.602681	0.643461	0.421789	0.380073	0.558261	0.867441	0.501042	0.443043	0.280767	0.315211	0.577875	0.572089	0.495374	0.441715	0.473344	0.374155	0.563632	0.155842	0.24013	0.146614	0.172448	0.314273	0.308836	0.388882	0.390742	0.451967	0.24801	0.376839	0.560611	0.499524	0.552378	0.49615	0.532785
Abhd4	0.0293135	0.0182274	0.0061287	0	0.0283072	0.0114903	0.0154213	0	0.0214287	0.0422639	0.00519567	0.0257958	0	0.011745	0.0214492	0.0138434	0.0330828	0.0329857	0.0656362	0.0167587	0.0299967	0.0230181	0.0282324	0.0266139	0.00892833	0.0278206	0.0229695	0.0322298	0.0339268	0.0138406	0.0338591	0	0.310898	0.0185017	0.054456	0.0775363	0.0238828	0.0149081	0.0852699	0.0233656	0.00780041	0.0137709	0.059136	0.0384631	0.0651689	0	0.013182	0.00597811	0.0385458
Abhd6	0.112953	0.177286	0.266859	0.307197	0.331812	0.246494	0.27757	0.258853	0.313393	0.539641	0.153193	0.291656	0.326205	0.561556	0.479997	0.322543	0.328898	0.275664	0.455401	0.205241	0.31137	0.402201	0.399476	0.331974	0.275685	0.252586	0.149169	0.0985334	0.174073	0.226747	0.108459	0.114471	0	0.0936827	0.103719	0.0738427	0.0591651	0.0499841	0.145125	0.0690081	0.125995	0.0751469	0.0783082	0.142122	0.204504	0.315452	0.162705	0.21392	0.448189
Abhd10	0.137729	0.133929	0.165234	0.0679344	0.162818	0.0995503	0.127907	0.139455	0.159184	0.180154	0.0877527	0.161566	0.0997506	0.135708	0.0630419	0.112972	0.153428	0.155688	0.150581	0.106555	0.155855	0.117688	0.0845593	0.107022	0.0935051	0.119597	0.108023	0.105794	0.125217	0.117202	0.169849	0.140913	0.384648	0.156995	0.205107	0.34759	0.105545	0.170348	0.0708296	0.103556	0.104044	0.167408	0.199669	0.196063	0.237223	0.105049	0.20164	0.210536	0.175969
Abhd11	0.277608	0.302471	0.408525	0.24637	0.371708	0.375032	0.399066	0.38037	0.427405	0.485523	0.364642	0.472034	0.180891	0.423697	0.261474	0.403284	0.45587	0.434134	0.478327	0.406089	0.221734	0.334659	0.317948	0.373933	0.40744	0.226816	0.443758	0.384653	0.282545	0.278128	0.310538	0.136861	1.03163	0.375295	0.471304	0.230959	0.222177	0.221671	0.0958787	0.19192	0.15374	0.180381	0.188348	0.169588	0.287442	0.359577	0.359047	0.347689	0.427123
Abhd12	1.17047	1.31668	1.19192	1.11606	1.30937	1.21477	1.45923	1.27125	1.21266	1.34508	0.878378	1.11223	0.992483	1.00755	1.03133	1.62701	1.32225	1.4774	1.01022	1.01543	1.35299	1.75115	1.2997	1.23652	0.536062	0.656041	1.16764	0.929012	0.838291	0.82294	0.709608	0.591403	0.601644	0.334207	0.232019	0.233237	0.188195	0.62874	0.510352	0.621354	0.598034	0.380131	0.209704	0.400851	0.658242	0.485465	0.88978	1.10986	1.20196
Abhd13	0.139426	0.184128	0.167677	0.17944	0.174339	0.157762	0.243479	0.248903	0.18819	0.210036	0.180401	0.288561	0.439523	0.202957	0.259049	0.30586	0.262103	0.191571	0.17682	0.184456	0.240992	0.247092	0.190677	0.202817	0.0878279	0.11438	0.161903	0.134687	0.104629	0.140361	0.0740774	0.0525362	0	0.0626221	0.0315626	0.0571749	0.0581803	0.101968	0.0551709	0.0845748	0.0979828	0.107664	0.0768859	0.0731508	0.0778169	0.115298	0.187249	0.190435	0.159954
Abhd16a	0.486773	0.503052	0.48087	0.494345	0.680133	0.795804	0.467076	0.424227	0.661328	0.905952	0.421512	0.443228	0.433357	0.570501	0.331114	0.492465	0.611587	0.869272	0.736855	0.295962	0.388601	0.44403	0.40116	0.387743	0.388783	0.380057	0.439035	0.412143	0.312306	0.277171	0.291992	0.220113	0.583784	0.240466	0.42152	0.185371	0.156117	0.345358	0.267906	0.316473	0.325881	0.348339	0.320715	0.385228	0.446432	0.489514	0.396937	0.395632	0.370306
Abhd17a	0.558781	0.845621	0.841491	0.618341	0.905454	0.797616	1.15013	1.02382	1.02175	0.911526	0.570962	0.781125	0.803432	0.865073	0.714644	0.897816	0.759322	0.757256	0.773698	0.651965	1.0666	0.816806	0.637228	0.817416	0.659713	0.49925	0.613642	0.552347	0.419446	0.444118	0.303888	0.400569	0.333229	0.329811	0.228889	0.251636	0.216342	0.368457	0.275589	0.329336	0.360048	0.193206	0.175065	0.150536	0.306578	0.44723	0.426193	0.551033	0.619128
Abhd17b	0.160788	0.213682	0.20287	0.377838	0.225636	0.226582	0.270801	0.289533	0.214253	0.237741	0.214265	0.214782	0.309059	0.331136	0.552585	0.335913	0.233964	0.236321	0.179962	0.228028	0.333151	0.279023	0.203644	0.242297	0.189985	0.138105	0.158169	0.114602	0.150566	0.149224	0.136206	0.123824	0	0.214301	0.192903	0.334462	0.193374	0.208557	0.192519	0.16201	0.123141	0.128698	0.186749	0.144576	0.182553	0.216479	0.293411	0.323582	0.219906
Abhd17c	0.0432769	0.140998	0.137291	0.218385	0.115441	0.117116	0.109582	0.103485	0.101662	0.183382	0.0727231	0.295072	0.1323	0.0868796	0.349909	0.0917227	0.224316	0.222591	0.293814	0.242429	0.190265	0.242352	0.359499	0.23189	0.368483	0.315334	0.124931	0.114433	0.108541	0.129857	0.134324	0.0914525	0	0.233509	0.08624	0.17708	0.113336	0.0983288	0.0427685	0.0725546	0.0434296	0.107463	0	0.0382172	0.0592051	0.109478	0.0891513	0.132389	0.150053
Golga7	0.519032	0.502872	0.563289	0.369507	0.528731	0.422768	0.588302	0.628871	0.70041	0.64329	0.477002	0.521278	0.60338	0.792462	0.942251	0.626857	0.634962	0.661344	0.474702	0.594059	0.71539	0.376268	0.475487	0.644228	0.526861	0.457713	0.30064	0.266919	0.343283	0.380655	0.333339	0.286307	0.888299	0.543426	0.482635	0.49693	0.456308	0.435743	0.418386	0.305411	0.41737	0.566732	0.350156	0.494431	0.515769	0.455171	0.566511	0.465738	0.635115
Golga7b	0.750204	0.977367	1.19302	0.829989	0.938081	0.972323	1.18504	1.02785	1.21894	0.950416	0.616374	0.845473	0.702054	0.828568	0.775923	1.27602	0.836936	1.30282	0.621065	0.651578	0.788447	0.702665	0.710986	0.823553	0.38875	0.181882	0.0879365	0.0473968	0.056058	0.0742382	0.0695226	0.134147	0	0.198874	0.0201861	0.0054653	0.0399175	0.249523	0.0748497	0.195677	0.179973	0.468562	0.0450442	0.0317471	0.143624	0.0763094	0.312009	0.263425	0.288157
Selenok	2.83295	2.81993	2.72953	2.58985	2.91723	3.20547	2.87525	2.7135	2.87163	2.9893	2.54523	2.68724	2.71256	2.99858	2.45221	2.63919	2.64738	2.93425	2.79373	2.16726	2.53327	2.8851	2.68532	2.5002	2.25301	1.93561	2.51117	2.43839	2.47945	2.4874	2.53429	2.22936	4.18573	2.77062	2.9544	2.43297	2.49771	2.29299	2.40938	2.26407	2.10236	2.03212	2.08938	2.59044	2.84871	2.74983	2.92592	2.58256	2.83605
[truncated: 216 more columns]
