# Supplementary material for: Exploring the expression patterns of palmitoylating and de-palmitoylating enzymes in the mouse brain using the curated RNA-seq database BrainPalmSeq
Source: eLife. 2022 Jul 12;11:e75804. doi: 10.7554/eLife.75804 (PMC9365392; doi:10.7554/eLife.75804)
Supplement: Figure 4—source data 2. [file elife-75804-fig4-data2.xlsx]

## Sheet: BPSmatrix_Zeisel2018_CellType_M
Figure 4 - Source data 2 - Depalmitoylating enzyme and Zdhhc accessory protein expression (cell type averages) from ‘MouseBrain’ dataset (related to Figure 4B,C)
Index	1	2	3	4	5	6	7	8	9	10	11	12	13	14	15	16	17	18	19	20	21	22	23	24	25	26	27	28	29	30	31	32	33	34	35	36	37	38	39
Cell Type	Astrocytes	Cerebellum neurons	Cholinergic and monoaminergic neurons	Choroid epithelial cells	Dentate gyrus granule neurons	Dentate gyrus radial glia-like cells	Di- and mesencephalon excitatory neurons	Di- and mesencephalon inhibitory neurons	Enteric glia	Enteric neurons	Ependymal cells	Glutamatergic neuroblasts	Hindbrain neurons	Microglia	Non-glutamatergic neuroblasts	Olfactory ensheathing cells	Olfactory inhibitory neurons	Oligodendrocyte precursor cells	Oligodendrocytes	Peptidergic neurons	Pericytes	Peripheral sensory neurofilament neurons	Peripheral sensory non-peptidergic neurons	Peripheral sensory peptidergic neurons	Perivascular macrophages	Satellite glia	Schwann cells	Spinal cord excitatory neurons	Spinal cord inhibitory neurons	Subcommissural organ hypendymal cells	Subventricular zone radial glia-like cells	Sympathetic cholinergic neurons	Sympathetic noradrenergic neurons	Telencephalon inhibitory interneurons	Telencephalon projecting excitatory neurons	Telencephalon projecting inhibitory neurons	Vascular and leptomeningeal cells	Vascular endothelial cells	Vascular smooth muscle cells
Number of cells	19377	5292	1071	458	4368	327	6455	4026	10535	1105	1257	644	1144	5425	4822	2031	5191	820	30253	2906	5213	126	889	565	2029	684	47	1166	756	111	756	90	796	8637	18799	5691	1501	3805	1628
Cell ID	Astro	CB neur	Chol/mono neur	Chor epi	DG gran neur	DG rad glia	Di/mes-encep ex neur	Di/mes-encep in neur	Ent glia	Ent neur	Ependy	Glu NB	HB neur	Micro	Non-Glu NB	Olf EC	Olf Inhib neur	OPC	Oligo	Pept neur	Peri	Sens NF neur	Sens non-pept neur	Sens pept neur	Peri macro	Sat glia	Schwann	SC ex neur	SC inhib neur	SCO hyp	SV rad glia	Symp chol neur	Symp nor neur	Tel inhib interneur	Tel ex proj neur	Tel inhib proj neur	Vasc lepto	Vasc endo	Vasc SM
Lypla1	0.160161	0.0930005	0.359366	0.699684	0.105056	0.0787504	0.259244	0.302491	0.289373	0.436104	0.17507	0.335059	0.62791	0.144024	0.118221	0.18812	0.167016	0.209948	0.0903416	0.134886	0.34555	0.318135	0.381756	0.235204	0.126187	0.145873	0.201664	0.0832727	0.163787	0.25207	0.134564	0.464159	0.427037	0.205568	0.182862	0.0946215	0.189111	0.347096	0.23737
Lypla2	0.141837	0.179009	0.350944	0.157678	0.136769	0.132492	0.366716	0.3665	0.288565	0.391231	0.577098	0.274103	0.541689	0.154216	0.256113	0.121916	0.295314	0.205678	0.111446	0.221967	0.232495	0.611841	0.777107	0.542157	0.238781	0.125604	0.0454399	0.29668	0.308648	0.144154	0.152101	0.578013	0.615802	0.391522	0.379547	0.225586	0.136421	0.225687	0.106227
Ppt1	0.442436	0.191214	0.731186	0.511344	0.307459	0.298705	0.586968	0.751997	0.490677	0.645968	0.473642	0.471447	0.96804	0.692496	0.165069	0.674187	0.39121	0.580241	0.518883	0.457238	0.371456	0.265138	0.308306	0.259619	0.666332	0.624969	0.680491	0.58274	0.622147	0.31618	0.625498	0.441561	0.465562	0.657808	0.601791	0.495161	0.320611	0.3202	0.340478
Abhd4	0.550628	0.0153948	0.117997	0.218106	0.023569	0.421119	0.0320276	0.0424777	0.43457	0.171867	0.546552	0.0646209	0.0945077	0.119751	0.0344992	0.645013	0.0296273	0.253684	0.714079	0.0308828	0.207973	0.186281	0.164662	0.236843	0.100744	2.3453	0.704948	0.0419047	0.0570543	0.414716	0.654468	0.08844	0.106713	0.0201616	0.0245383	0.0232025	0.185515	0.185019	0.12934
Abhd5	0.142063	0.0242055	0.0738402	0.17958	0.0503405	0.0850832	0.0920345	0.0687748	0.171202	0.155638	0.0527321	0.0420786	0.0796823	0.0654657	0.0547915	0.117549	0.0684957	0.126725	0.52122	0.0399336	0.309248	0.207509	0.451232	0.219326	0.0600475	0.167858	0.284222	0.0420837	0.105875	0	0.103861	0.271324	0.232617	0.0508433	0.100738	0.0790281	0.206314	0.318997	0.150275
Abhd6	0.253522	0.111581	0.0838223	0.135599	0.257785	0.18904	0.161639	0.181951	0.0233893	0.102242	0.186448	0.154552	0.343715	0.408968	0.0738478	0.128995	0.105996	0.242591	0.120512	0.152205	0.207942	0.158681	0.135813	0.138798	0.352639	0.221165	0.507826	0.0938266	0.142649	0.0267257	0.16446	0.165817	0.224945	0.353908	0.320242	0.160623	0.0631766	0.285553	0.0339798
Abhd10	0.141029	0.0694248	0.25474	0.109372	0.113725	0.178697	0.166767	0.188341	0.124407	0.241735	0.148321	0.176321	0.232607	0.0680761	0.173391	0.168698	0.141062	0.254667	0.0956751	0.168655	0.142556	0.389529	0.280754	0.286345	0.0762397	0.125371	0.225279	0.119261	0.160047	0.278956	0.138834	0.379748	0.405327	0.170232	0.137704	0.120992	0.0966	0.121201	0.116352
Abhd11	0.300548	0.105224	0.408762	0.177674	0.267465	0.279611	0.4068	0.395175	0.161032	0.239366	0.137601	0.242057	0.257936	0.105117	0.27922	0.184795	0.186675	0.179506	0.213638	0.285225	0.126049	0.308821	0.572948	0.681891	0.102937	0.182333	0.177749	0.259566	0.404599	0.541055	0.168185	0.586842	0.724236	0.449983	0.385502	0.313951	0.188894	0.131558	0.0826299
Abhd12	0.574097	0.306505	1.10014	0.494819	0.629041	0.328573	1.07023	1.15101	0.407572	0.562197	0.262742	0.771283	1.47875	1.76901	0.243066	1.20683	0.538386	0.867043	0.633658	0.701482	0.196841	1.51489	1.2303	1.1969	1.1334	0.537134	1.52081	0.813164	1.10936	0.274171	0.367445	1.32374	1.35671	1.10236	1.28609	0.870561	0.248699	0.187711	0.165049
Abhd13	0.108473	0.0473294	0.226664	0.207835	0.108405	0.0727223	0.167635	0.164983	0.138173	0.119338	0.0952468	0.102655	0.281813	0.0466194	0.0583468	0.0836868	0.0858878	0.127169	0.0954916	0.095461	0.122511	0.0914347	0.107824	0.0933248	0.0480365	0.06792	0.0533494	0.0654632	0.0963699	0.0332275	0.0581208	0.115257	0.0681138	0.130229	0.198924	0.122296	0.0952893	0.0904462	0.0850499
Abhd16a	0.253604	0.626043	0.35406	0.20885	0.382021	0.19173	0.430536	0.36485	0.455771	0.517448	0.349268	0.55435	0.454661	0.343811	0.196657	0.360489	0.342949	0.431864	0.367867	0.345705	0.400581	0.444864	0.805669	0.804869	0.278288	0.561956	0.754539	0.438869	0.470041	0.55617	0.249467	0.973912	1.13459	0.409931	0.585508	0.331237	0.442261	0.424719	0.411724
Abhd17a	0.279782	0.285261	0.628151	0.29325	0.535361	0.205361	0.644013	0.554291	0.34453	0.526159	0.349311	0.424945	0.93189	0.174402	0.258035	0.222483	0.285006	0.263352	1.08649	0.375938	1.08646	1.34281	1.11114	0.914932	0.245635	0.319782	0.421233	0.622916	0.823198	0.289109	0.238083	0.388523	0.340308	0.574978	0.846659	0.472219	0.267107	1.17501	0.31154
Abhd17b	0.32224	0.162657	0.436102	0.468779	0.149781	0.304106	0.308328	0.337597	0.256856	0.410759	0.266017	0.160172	0.622132	0.0890554	0.22776	0.205306	0.158079	0.52218	1.54611	0.212356	0.151025	0.398254	0.693445	0.423636	0.111315	0.406717	0.289947	0.217633	0.347751	0.0841195	0.222354	0.389305	0.247124	0.241786	0.228852	0.141034	0.139311	0.165214	0.1453
Abhd17c	0.10364	0.0359622	0.111216	0.102146	0.327295	0.0627105	0.074101	0.0849913	0.0661327	0.0818003	0.128352	0.0750207	0.110034	0.0385834	0.161126	0.0634927	0.0621874	0.128535	0.0989827	0.0744541	0.133865	0.141713	0.12355	0.297471	0.0279877	0.101037	0.0409371	0.10553	0.0844277	0.0257546	0.0528243	0.00977046	0.0400577	0.0957952	0.174582	0.118218	0.139258	0.123865	0.0468274
Golga7	0.404503	0.26407	0.653147	0.63752	0.473274	0.767678	0.528513	0.592501	0.867838	0.807689	0.574652	0.4748	0.601742	0.354749	0.49209	1.92772	0.410909	0.894598	2.61195	0.384241	0.609476	0.599888	0.993054	0.624749	0.457697	1.06769	0.942347	0.308391	0.407701	0.597597	0.643908	0.963341	0.923167	0.661838	0.576843	0.326588	0.41369	0.559801	0.518241
Golga7b	0.0299713	0.174798	0.639778	0.00157394	0.228437	0.0245873	0.535301	0.523232	0.00849695	0.817425	0.00766629	0.720353	1.13757	0.0172518	0.0799057	0.0162056	0.176315	0.0259284	0.0101356	0.262771	0.0130038	0.680988	0.704695	0.270764	0.0178462	0.0245473	0.0432666	0.53548	0.619868	0	0.0233716	0.408588	0.265293	0.328452	0.950214	0.0724048	0.017842	0.0134665	0.019752
Selenok	2.42297	1.83906	2.48042	2.52774	2.00704	2.98004	2.5437	2.26009	2.75224	2.83594	2.33675	3.00586	1.64981	1.94023	2.58397	2.98374	2.32343	3.32585	3.56485	2.60523	3.06637	3.82076	4.97085	4.27044	2.56837	3.99917	3.81677	2.27508	2.30378	2.87551	2.89592	4.47419	4.4343	2.95964	2.7952	2.45913	2.77413	3.03348	2.53461
