# Supplementary material for: Exploring the expression patterns of palmitoylating and de-palmitoylating enzymes in the mouse brain using the curated RNA-seq database BrainPalmSeq
Source: eLife. 2022 Jul 12;11:e75804. doi: 10.7554/eLife.75804 (PMC9365392; doi:10.7554/eLife.75804)
Supplement: Figure 4—source data 3. [file elife-75804-fig4-data3.xlsx]

## Sheet: S2A
Figure 4 - Source data 3 (Figure 4D): Spearman correlations 'MouseBrain' dataset
	Zdhhc1	Zdhhc2	Zdhhc3	Zdhhc4	Zdhhc5	Zdhhc6	Zdhhc7	Zdhhc8	Zdhhc9	Zdhhc11	Zdhhc12	Zdhhc13	Zdhhc14	Zdhhc15	Zdhhc16	Zdhhc17	Zdhhc18	Zdhhc19	Zdhhc20	Zdhhc21	Zdhhc22	Zdhhc23	Zdhhc24	Zdhhc25	Lypla1	Lypla2	Ppt1	Abhd4	Abhd6	Abhd10	Abhd11	Abhd12	Abhd13	Abhd16a	Abhd17a	Abhd17b	Abhd17c	Golga7	Golga7b	Selenok
Zdhhc1	1	0.225202	0.218359	0.234323	0.24936	0.21167	0.159056	0.234416	0.0971977	0.0520847	0.0128793	0.133236	-0.188298	0.250756	0.0339547	0.175816	0.304127	-0.0187668	0.164482	0.25299	0.0794632	-0.0982773	0.154413	NA	0.417269	0.214078	0.155861	0.128482	-0.00155486	0.21517	0.0707293	0.021031	0.210523	0.155346	0.100793	0.125537	0.0601111	0.27561	0.15161	-0.0256528
Zdhhc2	0.225202	1	0.432069	0.232073	0.368486	0.197081	0.539711	0.617469	0.436875	0.207262	0.114796	0.433459	0.330454	0.630869	0.28929	0.500137	0.302088	-0.0498992	0.275098	0.578635	0.301758	-0.00283553	0.301138	NA	0.369741	0.442936	0.219831	0.146108	-0.0678898	0.386248	0.318239	0.359297	0.31049	0.254193	0.320022	0.453987	0.149971	0.436347	0.333107	0.169552
Zdhhc3	0.218359	0.432069	1	0.0268804	0.594299	0.282839	0.536606	0.644668	0.52845	0.00275643	-0.110662	0.477053	0.348309	0.363402	0.327744	0.688774	0.521848	-0.0395345	0.392394	0.686221	0.301094	0.108603	0.417533	NA	0.408181	0.587176	0.404983	-0.149001	0.283328	0.262628	0.35262	0.603027	0.472519	0.176433	0.61414	0.439925	0.367249	0.275001	0.635321	-0.0117367
Zdhhc4	0.234323	0.232073	0.0268804	1	-0.165339	0.326034	0.270493	0.10715	0.177674	0.225645	0.478377	0.118219	-0.00936081	0.253795	0.400627	-0.097481	0.1825	0.0461589	-0.148268	-0.0505735	0.0243429	0.0553694	-0.0104371	NA	0.156771	0.0785395	-0.244973	0.502126	-0.0347472	0.153342	0.0606052	-0.105141	-0.129747	0.290809	0.156191	0.164821	0.147635	0.414205	-0.11086	0.41217
Zdhhc5	0.24936	0.368486	0.594299	-0.165339	1	0.219046	0.300584	0.492542	0.400074	-0.0486277	-0.187796	0.311602	0.321992	0.304003	0.0574241	0.643963	0.469118	0.0143987	0.419969	0.662569	0.200313	0.0202244	0.438934	NA	0.504517	0.460492	0.500452	-0.204521	0.276233	0.197357	0.314799	0.474602	0.587287	0.0476725	0.338751	0.235506	0.176864	0.21227	0.478335	-0.105086
Zdhhc6	0.21167	0.197081	0.282839	0.326034	0.219046	1	0.317855	0.253204	0.26225	0.103479	0.368278	0.311365	0.111052	0.233541	0.321887	0.149512	0.262326	0.0505319	0.0318705	0.222117	0.13525	0.135305	0.187163	NA	0.282537	0.333235	0.0519479	0.211111	0.228045	0.241111	0.251801	0.254073	0.163509	0.330316	0.277365	0.149588	0.141839	0.394479	0.0391861	0.285194
Zdhhc7	0.159056	0.539711	0.536606	0.270493	0.300584	0.317855	1	0.63126	0.571318	0.103929	0.23756	0.430318	0.37337	0.50871	0.367273	0.53875	0.366755	0.0291807	0.295607	0.528477	0.208556	0.0851827	0.33388	NA	0.345962	0.408128	0.174295	0.150267	0.150857	0.261236	0.30312	0.508812	0.351029	0.245195	0.500448	0.4411	0.383698	0.377545	0.356276	0.050113
Zdhhc8	0.234416	0.617469	0.644668	0.10715	0.492542	0.253204	0.63126	1	0.582776	0.0865217	0.048938	0.491377	0.512049	0.63203	0.272965	0.699603	0.515635	-0.0170296	0.416831	0.752736	0.341616	0.15969	0.426004	NA	0.317313	0.518677	0.222656	-0.107809	0.131075	0.260942	0.378109	0.530832	0.504839	0.211992	0.611211	0.364149	0.373132	0.246669	0.623858	0.0135816
Zdhhc9	0.0971977	0.436875	0.52845	0.177674	0.400074	0.26225	0.571318	0.582776	1	-0.0162544	0.231203	0.412873	0.477944	0.388569	0.255953	0.610215	0.452935	0.173028	0.401759	0.586184	0.19091	0.0376632	0.533431	NA	0.382368	0.407389	0.314415	0.121912	0.228349	0.114005	0.230791	0.481807	0.470483	0.116456	0.702569	0.57788	0.321552	0.416015	0.401432	0.0640085
Zdhhc11	0.0520847	0.207262	0.00275643	0.225645	-0.0486277	0.103479	0.103929	0.0865217	-0.0162544	1	0.0704758	0.0702487	0.0115058	0.110487	0.0869785	-0.0141437	0.0222111	-0.0408124	-0.152685	0.025497	-0.00284039	0.0920688	-0.0384749	NA	0.0957485	0.0793674	-0.136614	0.157705	-0.0226417	0.0298107	-0.0803805	0.0247381	-0.0193059	0.0618282	0.0151604	0.0130429	0.0503739	0.153474	-0.0233761	0.136977
Zdhhc12	0.0128793	0.114796	-0.110662	0.478377	-0.187796	0.368278	0.23756	0.048938	0.231203	0.0704758	1	0.167589	0.0742553	0.176038	0.338863	-0.138684	0.0420698	0.0716057	-0.141629	-0.11348	0.0222065	0.160607	0.0426621	NA	0.00935252	0.0167974	-0.176354	0.436207	0.133008	0.0889814	0.109725	0.0107554	-0.0846725	0.253812	0.0492042	0.0590509	0.0447351	0.343503	-0.261507	0.460438
Zdhhc13	0.133236	0.433459	0.477053	0.118219	0.311602	0.311365	0.430318	0.491377	0.412873	0.0702487	0.167589	1	0.295788	0.404201	0.375786	0.446641	0.286516	-0.0786715	0.187497	0.506415	0.314995	0.170309	0.320713	NA	0.334998	0.568527	0.219913	-0.00684907	0.221927	0.3507	0.314337	0.467743	0.283021	0.26469	0.361934	0.305083	0.240434	0.32003	0.434636	0.0670221
Zdhhc14	-0.188298	0.330454	0.348309	-0.00936081	0.321992	0.111052	0.37337	0.512049	0.477944	0.0115058	0.0742553	0.295788	1	0.325985	0.193355	0.475782	0.250798	0.0916189	0.270464	0.465333	0.251755	0.162141	0.4049	NA	0.0506763	0.271246	0.151505	-0.148761	0.169859	0.0573423	0.247697	0.379018	0.324866	0.160413	0.437562	0.29091	0.186803	0.126702	0.361366	0.0540212
Zdhhc15	0.250756	0.630869	0.363402	0.253795	0.304003	0.233541	0.50871	0.63203	0.388569	0.110487	0.176038	0.404201	0.325985	1	0.203701	0.437277	0.384837	-0.054385	0.320994	0.526477	0.215132	0.0683259	0.252565	NA	0.330717	0.379406	0.0381148	0.0508354	-0.0581332	0.388684	0.290179	0.28339	0.261004	0.230036	0.321961	0.302756	0.202164	0.281712	0.306242	0.204151
Zdhhc16	0.0339547	0.28929	0.327744	0.400627	0.0574241	0.321887	0.367273	0.272965	0.255953	0.0869785	0.338863	0.375786	0.193355	0.203701	1	0.140541	0.147026	-0.0988353	-0.13877	0.148852	0.166113	0.174579	0.0526043	NA	0.199948	0.373568	-0.0257756	0.0585366	0.236637	0.167107	0.318506	0.176158	0.0731062	0.431148	0.246138	0.169754	0.251712	0.379215	0.170807	0.378862
Zdhhc17	0.175816	0.500137	0.688774	-0.097481	0.643963	0.149512	0.53875	0.699603	0.610215	-0.0141437	-0.138684	0.446641	0.475782	0.437277	0.140541	1	0.481397	0.061083	0.53437	0.789208	0.305796	0.0326324	0.502023	NA	0.363802	0.55389	0.41338	-0.218542	0.145648	0.267293	0.424882	0.655876	0.527532	0.0478404	0.543835	0.509411	0.319767	0.190672	0.619707	-0.140024
Zdhhc18	0.304127	0.302088	0.521848	0.1825	0.469118	0.262326	0.366755	0.515635	0.452935	0.0222111	0.0420698	0.286516	0.250798	0.384837	0.147026	0.481397	1	0.069163	0.184326	0.540913	0.168908	0.0675807	0.276131	NA	0.4601	0.417225	0.193034	0.120523	0.268116	0.262788	0.19544	0.359914	0.447652	0.165762	0.444839	0.335849	0.332992	0.173029	0.379708	0.0399059
Zdhhc19	-0.0187668	-0.0498992	-0.0395345	0.0461589	0.0143987	0.0505319	0.0291807	-0.0170296	0.173028	-0.0408124	0.0716057	-0.0786715	0.0916189	-0.054385	-0.0988353	0.061083	0.069163	1	0.173369	-0.00934087	-0.0614238	-0.0078726	0.100857	NA	0.0617498	-0.0673506	-0.0217025	0.149722	0.0123357	-0.0551483	-0.109973	-0.0484726	0.0659446	-0.129444	0.199371	0.0937796	0.0958785	0.125598	-0.115654	0.0555427
Zdhhc20	0.164482	0.275098	0.392394	-0.148268	0.419969	0.0318705	0.295607	0.416831	0.401759	-0.152685	-0.141629	0.187497	0.270464	0.320994	-0.13877	0.53437	0.184326	0.173369	1	0.480457	0.188507	-0.0409924	0.497438	NA	0.197151	0.203786	0.461612	-0.135061	-0.0419169	0.103792	0.20402	0.317404	0.394421	-0.132913	0.381901	0.355168	0.198255	0.0860283	0.417443	-0.390798
Zdhhc21	0.25299	0.578635	0.686221	-0.0505735	0.662569	0.222117	0.528477	0.752736	0.586184	0.025497	-0.11348	0.506415	0.465333	0.526477	0.148852	0.789208	0.540913	-0.00934087	0.480457	1	0.359947	0.00637198	0.514893	NA	0.472194	0.597159	0.320639	-0.150199	0.165404	0.329582	0.403736	0.571423	0.56298	0.133535	0.54589	0.506075	0.287348	0.272286	0.658165	-0.0553864
Zdhhc22	0.0794632	0.301758	0.301094	0.0243429	0.200313	0.13525	0.208556	0.341616	0.19091	-0.00284039	0.0222065	0.314995	0.251755	0.215132	0.166113	0.305796	0.168908	-0.0614238	0.188507	0.359947	1	0.094075	0.185996	NA	0.117367	0.371389	0.114142	-0.112968	0.209999	0.245946	0.4725	0.334144	0.0377926	0.261317	0.23416	0.0751926	0.0728352	0.122069	0.324355	0.0909442
Zdhhc23	-0.0982773	-0.00283553	0.108603	0.0553694	0.0202244	0.135305	0.0851827	0.15969	0.0376632	0.0920688	0.160607	0.170309	0.162141	0.0683259	0.174579	0.0326324	0.0675807	-0.0078726	-0.0409924	0.00637198	0.094075	1	0.0984726	NA	-0.127594	0.0832671	-0.0178078	-0.0982052	0.115693	-0.0627447	0.0353378	0.074362	0.10022	0.08601	0.0708443	-0.118108	0.207665	-0.0737795	0.0967044	0.0302001
Zdhhc24	0.154413	0.301138	0.417533	-0.0104371	0.438934	0.187163	0.33388	0.426004	0.533431	-0.0384749	0.0426621	0.320713	0.4049	0.252565	0.0526043	0.502023	0.276131	0.100857	0.497438	0.514893	0.185996	0.0984726	1	NA	0.308947	0.286044	0.4969	0.0250522	0.161381	0.0850408	0.157698	0.323962	0.521726	-0.0317947	0.399789	0.463884	0.201133	0.341345	0.401616	-0.130281
Zdhhc25	NA	NA	NA	NA	NA	NA	NA	NA	NA	NA	NA	NA	NA	NA	NA	NA	NA	NA	NA	NA	NA	NA	NA	1	NA	NA	NA	NA	NA	NA	NA	NA	NA	NA	NA	NA	NA	NA	NA	NA
Lypla1	0.417269	0.369741	0.408181	0.156771	0.504517	0.282537	0.345962	0.317313	0.382368	0.0957485	0.00935252	0.334998	0.0506763	0.330717	0.199948	0.363802	0.4601	0.0617498	0.197151	0.472194	0.117367	-0.127594	0.308947	NA	1	0.435018	0.257756	0.21465	0.0347504	0.379948	0.0913147	0.222932	0.379754	0.158195	0.200225	0.353406	0.0618849	0.440057	0.264477	0.064505
Lypla2	0.214078	0.442936	0.587176	0.0785395	0.460492	0.333235	0.408128	0.518677	0.407389	0.0793674	0.0167974	0.568527	0.271246	0.379406	0.373568	0.55389	0.417225	-0.0673506	0.203786	0.597159	0.371389	0.0832671	0.286044	NA	0.435018	1	0.221954	-0.0641575	0.247656	0.421	0.443679	0.52371	0.246583	0.288863	0.424422	0.27967	0.172666	0.297195	0.505259	0.111006
Ppt1	0.155861	0.219831	0.404983	-0.244973	0.500452	0.0519479	0.174295	0.222656	0.314415	-0.136614	-0.176354	0.219913	0.151505	0.0381148	-0.0257756	0.41338	0.193034	-0.0217025	0.461612	0.320639	0.114142	-0.0178078	0.4969	NA	0.257756	0.221954	1	-0.0529474	0.225921	0.0174912	0.113857	0.448477	0.440157	-0.0575736	0.256958	0.304196	0.0710572	0.219967	0.361908	-0.317966
Abhd4	0.128482	0.146108	-0.149001	0.502126	-0.204521	0.211111	0.150267	-0.107809	0.121912	0.157705	0.436207	-0.00684907	-0.148761	0.0508354	0.0585366	-0.218542	0.120523	0.149722	-0.135061	-0.150199	-0.112968	-0.0982052	0.0250522	NA	0.21465	-0.0641575	-0.0529474	1	-0.122723	0.149073	-0.21766	-0.140089	-0.063898	0.0804871	-0.00243005	0.264379	0.00373419	0.399286	-0.350134	0.176646
Abhd6	-0.00155486	-0.0678898	0.283328	-0.0347472	0.276233	0.228045	0.150857	0.131075	0.228349	-0.0226417	0.133008	0.221927	0.169859	-0.0581332	0.236637	0.145648	0.268116	0.0123357	-0.0419169	0.165404	0.209999	0.115693	0.161381	NA	0.0347504	0.247656	0.225921	-0.122723	1	-0.122035	0.148595	0.397641	0.161067	0.103389	0.215816	-0.0256447	0.116957	0.119359	0.148738	0.104666
Abhd10	0.21517	0.386248	0.262628	0.153342	0.197357	0.241111	0.261236	0.260942	0.114005	0.0298107	0.0889814	0.3507	0.0573423	0.388684	0.167107	0.267293	0.262788	-0.0551483	0.103792	0.329582	0.245946	-0.0627447	0.0850408	NA	0.379948	0.421	0.0174912	0.149073	-0.122035	1	0.326684	0.251862	-0.0402408	0.260524	0.0898465	0.187385	0.0110914	0.273516	0.169199	0.293023
Abhd11	0.0707293	0.318239	0.35262	0.0606052	0.314799	0.251801	0.30312	0.378109	0.230791	-0.0803805	0.109725	0.314337	0.247697	0.290179	0.318506	0.424882	0.19544	-0.109973	0.20402	0.403736	0.4725	0.0353378	0.157698	NA	0.0913147	0.443679	0.113857	-0.21766	0.148595	0.326684	1	0.430224	0.029715	0.297768	0.239607	0.0956132	0.120215	0.180066	0.338104	0.216246
Abhd12	0.021031	0.359297	0.603027	-0.105141	0.474602	0.254073	0.508812	0.530832	0.481807	0.0247381	0.0107554	0.467743	0.379018	0.28339	0.176158	0.655876	0.359914	-0.0484726	0.317404	0.571423	0.334144	0.074362	0.323962	NA	0.222932	0.52371	0.448477	-0.140089	0.397641	0.251862	0.430224	1	0.330251	0.202399	0.507677	0.308282	0.191587	0.168284	0.550947	-0.0243432
Abhd13	0.210523	0.31049	0.472519	-0.129747	0.587287	0.163509	0.351029	0.504839	0.470483	-0.0193059	-0.0846725	0.283021	0.324866	0.261004	0.0731062	0.527532	0.447652	0.0659446	0.394421	0.56298	0.0377926	0.10022	0.521726	NA	0.379754	0.246583	0.440157	-0.063898	0.161067	-0.0402408	0.029715	0.330251	1	-0.0417574	0.364865	0.429849	0.339873	0.21396	0.375331	-0.278765
Abhd16a	0.155346	0.254193	0.176433	0.290809	0.0476725	0.330316	0.245195	0.211992	0.116456	0.0618282	0.253812	0.26469	0.160413	0.230036	0.431148	0.0478404	0.165762	-0.129444	-0.132913	0.133535	0.261317	0.08601	-0.0317947	NA	0.158195	0.288863	-0.0575736	0.0804871	0.103389	0.260524	0.297768	0.202399	-0.0417574	1	0.185715	0.0488741	-0.0699636	0.206917	0.15889	0.422057
Abhd17a	0.100793	0.320022	0.61414	0.156191	0.338751	0.277365	0.500448	0.611211	0.702569	0.0151604	0.0492042	0.361934	0.437562	0.321961	0.246138	0.543835	0.444839	0.199371	0.381901	0.54589	0.23416	0.0708443	0.399789	NA	0.200225	0.424422	0.256958	-0.00243005	0.215816	0.0898465	0.239607	0.507677	0.364865	0.185715	1	0.421197	0.428578	0.257131	0.490926	0.0282967
Abhd17b	0.125537	0.453987	0.439925	0.164821	0.235506	0.149588	0.4411	0.364149	0.57788	0.0130429	0.0590509	0.305083	0.29091	0.302756	0.169754	0.509411	0.335849	0.0937796	0.355168	0.506075	0.0751926	-0.118108	0.463884	NA	0.353406	0.27967	0.304196	0.264379	-0.0256447	0.187385	0.0956132	0.308282	0.429849	0.0488741	0.421197	1	0.263556	0.482446	0.264777	-0.0466701
Abhd17c	0.0601111	0.149971	0.367249	0.147635	0.176864	0.141839	0.383698	0.373132	0.321552	0.0503739	0.0447351	0.240434	0.186803	0.202164	0.251712	0.319767	0.332992	0.0958785	0.198255	0.287348	0.0728352	0.207665	0.201133	NA	0.0618849	0.172666	0.0710572	0.00373419	0.116957	0.0110914	0.120215	0.191587	0.339873	-0.0699636	0.428578	0.263556	1	0.137465	0.207461	-0.0650195
Golga7	0.27561	0.436347	0.275001	0.414205	0.21227	0.394479	0.377545	0.246669	0.416015	0.153474	0.343503	0.32003	0.126702	0.281712	0.379215	0.190672	0.173029	0.125598	0.0860283	0.272286	0.122069	-0.0737795	0.341345	NA	0.440057	0.297195	0.219967	0.399286	0.119359	0.273516	0.180066	0.168284	0.21396	0.206917	0.257131	0.482446	0.137465	1	0.023379	0.37628
Golga7b	0.15161	0.333107	0.635321	-0.11086	0.478335	0.0391861	0.356276	0.623858	0.401432	-0.0233761	-0.261507	0.434636	0.361366	0.306242	0.170807	0.619707	0.379708	-0.115654	0.417443	0.658165	0.324355	0.0967044	0.401616	NA	0.264477	0.505259	0.361908	-0.350134	0.148738	0.169199	0.338104	0.550947	0.375331	0.15889	0.490926	0.264777	0.207461	0.023379	1	-0.193885
Selenok	-0.0256528	0.169552	-0.0117367	0.41217	-0.105086	0.285194	0.050113	0.0135816	0.0640085	0.136977	0.460438	0.0670221	0.0540212	0.204151	0.378862	-0.140024	0.0399059	0.0555427	-0.390798	-0.0553864	0.0909442	0.0302001	-0.130281	NA	0.064505	0.111006	-0.317966	0.176646	0.104666	0.293023	0.216246	-0.0243432	-0.278765	0.422057	0.0282967	-0.0466701	-0.0650195	0.37628	-0.193885	1

## Sheet: S2B
Supplementary Table 2B: Spearman correlations 'DropViz' dataset
	Zdhhc1	Zdhhc2	Zdhhc3	Zdhhc4	Zdhhc5	Zdhhc6	Zdhhc7	Zdhhc8	Zdhhc9	Zdhhc11	Zdhhc12	Zdhhc13	Zdhhc14	Zdhhc15	Zdhhc16	Zdhhc17	Zdhhc18	Zdhhc19	Zdhhc20	Zdhhc21	Zdhhc22	Zdhhc23	Zdhhc24	Zdhhc25	Lypla1	Lypla2	Ppt1	Abhd17a	Abhd17b	Abhd17c	Golga7	Golga7b	Selk
Zdhhc1	1	-0.05133	0.150052	0.083611	0.281015	0.126084	0.079699	0.076225	-0.19251	0.037698	-0.16906	-0.10529	-0.34611	0.047091	0.007825	-0.06522	0.246305	-0.06616	-0.01867	-0.0185	0.107699	-0.08097	-0.08606	0.003873	0.32448	0.128508	-0.06235	-0.01323	-0.25945	-0.02681	-0.14207	0.030805	-0.14418
Zdhhc2	-0.05133	1	0.429976	-0.41305	0.402369	-0.03386	0.169643	0.595794	0.148125	0	-0.17351	0.43698	0.151228	0.325785	0.261868	0.50557	0.238598	-0.08381	0.164741	0.628204	0.415738	0.38297	0.251762	0.047261	-0.19534	0.375021	0.219243	-0.07847	0.272863	0.11006	-0.34369	0.559462	-0.4032
Zdhhc3	0.150052	0.429976	1	-0.30671	0.572097	0.039117	0.244292	0.631138	0.077144	0.036918	-0.37042	0.404013	-0.03019	0.282934	0.303091	0.421907	0.368731	-0.07331	0.157482	0.580053	0.401989	0.252809	0.290851	-0.00465	0.055795	0.487794	0.007112	0.09452	0.042155	0.140327	-0.41379	0.588182	-0.54208
Zdhhc4	0.083611	-0.41305	-0.30671	1	-0.36394	0.113929	-0.01573	-0.4458	-0.00028	-0.0297	0.421726	-0.2635	0.011698	-0.10781	-0.00383	-0.46073	-0.17659	0.086628	-0.18657	-0.55107	-0.26725	-0.14259	-0.15321	-0.02066	0.074776	-0.219	-0.15622	0.236184	-0.08875	0.043377	0.416607	-0.43573	0.482213
Zdhhc5	0.281015	0.402369	0.572097	-0.36394	1	0.044871	0.248327	0.6679	-0.03228	0.013943	-0.47772	0.308686	-0.22297	0.231848	0.167398	0.395068	0.44495	-0.09192	0.29155	0.595161	0.379965	0.106557	0.282295	-0.00981	0.150309	0.495587	0.086501	-0.1147	-0.0054	0.093273	-0.56762	0.589984	-0.68467
Zdhhc6	0.126084	-0.03386	0.039117	0.113929	0.044871	1	0.108205	-0.01943	0.043787	-0.04494	0.093317	0.044303	-0.02648	0.137566	0.140751	-0.07921	0.098652	-0.01989	-0.07142	-0.06281	-0.07707	-0.00592	0.047613	0.026086	0.135397	0.002362	0.021211	0.10614	-0.0132	0.140271	0.09378	-0.09231	0.080042
Zdhhc7	0.079699	0.169643	0.244292	-0.01573	0.248327	0.108205	1	0.318003	0.084412	0.03434	0.008216	0.16387	0.102614	0.200232	0.17684	0.077415	0.285017	-0.06391	0.18177	0.164955	0.062898	0.153696	0.272139	0.048799	-0.00378	0.305132	0.056123	0.166323	0.027484	0.161624	-0.19617	0.121118	-0.24525
Zdhhc8	0.076225	0.595794	0.631138	-0.4458	0.6679	-0.01943	0.318003	1	0.152159	0.055253	-0.39928	0.496406	0.046505	0.371116	0.287774	0.566684	0.453662	-0.06039	0.297094	0.757783	0.464554	0.335812	0.364421	0.007488	0.003835	0.472747	0.021589	0.029416	0.136587	0.146208	-0.56063	0.741723	-0.74534
Zdhhc9	-0.19251	0.148125	0.077144	-0.00028	-0.03228	0.043787	0.084412	0.152159	1	0.034097	0.253893	0.092334	0.37179	0.050897	0.089053	0.222931	-0.08301	0.126507	0.201682	0.14071	0.076836	0.184324	0.241117	-0.0359	-0.24268	-0.03707	0.131981	0.392426	0.39619	0.066786	0.189861	0.129034	0.067664
Zdhhc11	0.037698	0	0.036918	-0.0297	0.013943	-0.04494	0.03434	0.055253	0.034097	1	0.02126	0.014471	0.01369	0.033359	0.051146	0.000516	0.053973	-0.00695	0.016006	0.068932	-0.02968	0.074075	0.035399	-0.00177	-0.03795	0.003614	0.01549	-0.01885	0.028141	0.022215	-0.03847	0.029495	-0.04905
Zdhhc12	-0.16906	-0.17351	-0.37042	0.421726	-0.47772	0.093317	0.008216	-0.39928	0.253893	0.02126	1	-0.16216	0.287943	0.010361	-0.00978	-0.25381	-0.18672	0.116764	-0.06055	-0.36836	-0.25678	0.137514	-0.0113	0.029556	-0.16343	-0.2853	0.001669	0.282325	0.129803	0.090319	0.479995	-0.36607	0.481871
Zdhhc13	-0.10529	0.43698	0.404013	-0.2635	0.308686	0.044303	0.16387	0.496406	0.092334	0.014471	-0.16216	1	0.176776	0.323252	0.287366	0.436321	0.204418	-0.03581	0.138693	0.455529	0.298326	0.320926	0.227203	0.056593	-0.11601	0.33082	0.013924	-0.0467	0.172619	0.294951	-0.27724	0.472163	-0.37838
Zdhhc14	-0.34611	0.151228	-0.03019	0.011698	-0.22297	-0.02648	0.102614	0.046505	0.37179	0.01369	0.287943	0.176776	1	0.094268	0.028932	0.173162	-0.11271	0.108869	0.148774	-0.01375	-0.01973	0.260893	0.043336	0.060959	-0.39975	-0.09163	0.192577	0.322232	0.379468	0.152058	0.158885	0.028968	0.129865
Zdhhc15	0.047091	0.325785	0.282934	-0.10781	0.231848	0.137566	0.200232	0.371116	0.050897	0.033359	0.010361	0.323252	0.094268	1	0.240483	0.252451	0.168582	0.000913	0.158313	0.313646	0.206031	0.345735	0.182181	0.03388	-0.00333	0.189906	-0.06568	0.018444	0.112727	0.245627	-0.17619	0.322506	-0.21621
Zdhhc16	0.007825	0.261868	0.303091	-0.00383	0.167398	0.140751	0.17684	0.287774	0.089053	0.051146	-0.00978	0.287366	0.028932	0.240483	1	0.14998	0.128436	-0.06295	-0.05493	0.249496	0.22386	0.280535	0.257186	-0.00026	0.027822	0.273209	-0.01121	0.100497	0.046941	0.185736	-0.06598	0.2798	-0.14194
Zdhhc17	-0.06522	0.50557	0.421907	-0.46073	0.395068	-0.07921	0.077415	0.566684	0.222931	0.000516	-0.25381	0.436321	0.173162	0.252451	0.14998	1	0.181584	0.016371	0.22103	0.602865	0.462692	0.330717	0.241182	0.009552	-0.23199	0.296572	0.094212	0.058352	0.260624	0.1144	-0.3324	0.603696	-0.39408
Zdhhc18	0.246305	0.238598	0.368731	-0.17659	0.44495	0.098652	0.285017	0.453662	-0.08301	0.053973	-0.18672	0.204418	-0.11271	0.168582	0.128436	0.181584	1	-0.06424	0.285137	0.317314	0.142522	0.142324	0.204469	0.068693	0.132126	0.384871	-0.06848	-0.02915	-0.05148	0.141338	-0.40409	0.313964	-0.49722
Zdhhc19	-0.06616	-0.08381	-0.07331	0.086628	-0.09192	-0.01989	-0.06391	-0.06039	0.126507	-0.00695	0.116764	-0.03581	0.108869	0.000913	-0.06295	0.016371	-0.06424	1	0.129488	-0.07855	-0.02512	0.019961	-0.03031	-0.00695	-0.07418	-0.10627	-0.06468	0.172591	0.081292	-0.00456	0.111464	-0.01469	0.089522
Zdhhc20	-0.01867	0.164741	0.157482	-0.18657	0.29155	-0.07142	0.18177	0.297094	0.201682	0.016006	-0.06055	0.138693	0.148774	0.158313	-0.05493	0.22103	0.285137	0.129488	1	0.16129	0.085581	0.136058	0.130613	0.011876	-0.16575	0.150343	0.127905	0.083177	0.207874	0.12282	-0.24984	0.272952	-0.35596
Zdhhc21	-0.0185	0.628204	0.580053	-0.55107	0.595161	-0.06281	0.164955	0.757783	0.14071	0.068932	-0.36836	0.455529	-0.01375	0.313646	0.249496	0.602865	0.317314	-0.07855	0.16129	1	0.436603	0.305745	0.326689	-0.01033	-0.07873	0.401746	0.137549	-0.04982	0.236113	0.072463	-0.47228	0.652084	-0.59908
Zdhhc22	0.107699	0.415738	0.401989	-0.26725	0.379965	-0.07707	0.062898	0.464554	0.076836	-0.02968	-0.25678	0.298326	-0.01973	0.206031	0.22386	0.462692	0.142522	-0.02512	0.085581	0.436603	1	0.283508	0.156524	0.038054	-0.03738	0.301016	-0.00391	-0.01317	-0.05284	0.026154	-0.30334	0.537934	-0.37527
Zdhhc23	-0.08097	0.38297	0.252809	-0.14259	0.106557	-0.00592	0.153696	0.335812	0.184324	0.074075	0.137514	0.320926	0.260893	0.345735	0.280535	0.330717	0.142324	0.019961	0.136058	0.305745	0.283508	1	0.151869	0.052208	-0.21065	0.192838	-0.05719	0.09784	0.083665	0.265916	-0.17668	0.394809	-0.19583
Zdhhc24	-0.08606	0.251762	0.290851	-0.15321	0.282295	0.047613	0.272139	0.364421	0.241117	0.035399	-0.0113	0.227203	0.043336	0.182181	0.257186	0.241182	0.204469	-0.03031	0.130613	0.326689	0.156524	0.151869	1	-0.02196	-0.03506	0.230961	0.212172	0.080906	0.323569	0.071038	-0.07864	0.206347	-0.20846
Zdhhc25	0.003873	0.047261	-0.00465	-0.02066	-0.00981	0.026086	0.048799	0.007488	-0.0359	-0.00177	0.029556	0.056593	0.060959	0.03388	-0.00026	0.009552	0.068693	-0.00695	0.011876	-0.01033	0.038054	0.052208	-0.02196	1	-0.05396	0.039242	-0.02969	-0.02633	-0.03795	0.045721	-0.04157	0.008797	-0.05396
Lypla1	0.32448	-0.19534	0.055795	0.074776	0.150309	0.135397	-0.00378	0.003835	-0.24268	-0.03795	-0.16343	-0.11601	-0.39975	-0.00333	0.027822	-0.23199	0.132126	-0.07418	-0.16575	-0.07873	-0.03738	-0.21065	-0.03506	-0.05396	1	0.099858	-0.19517	-0.15523	-0.39071	-0.11724	-0.01922	-0.06137	-0.0494
Lypla2	0.128508	0.375021	0.487794	-0.219	0.495587	0.002362	0.305132	0.472747	-0.03707	0.003614	-0.2853	0.33082	-0.09163	0.189906	0.273209	0.296572	0.384871	-0.10627	0.150343	0.401746	0.301016	0.192838	0.230961	0.039242	0.099858	1	0.017701	-0.07725	0.045439	0.143594	-0.38061	0.484322	-0.46071
Ppt1	-0.06235	0.219243	0.007112	-0.15622	0.086501	0.021211	0.056123	0.021589	0.131981	0.01549	0.001669	0.013924	0.192577	-0.06568	-0.01121	0.094212	-0.06848	-0.06468	0.127905	0.137549	-0.00391	-0.05719	0.212172	-0.02969	-0.19517	0.017701	1	-0.0571	0.371247	0.015245	0.018046	-0.01501	0.012478
Abhd17a	-0.01323	-0.07847	0.09452	0.236184	-0.1147	0.10614	0.166323	0.029416	0.392426	-0.01885	0.282325	-0.0467	0.322232	0.018444	0.100497	0.058352	-0.02915	0.172591	0.083177	-0.04982	-0.01317	0.09784	0.080906	-0.02633	-0.15523	-0.07725	-0.0571	1	0.141639	-0.00811	0.225429	0.008886	0.165178
Abhd17b	-0.25945	0.272863	0.042155	-0.08875	-0.0054	-0.0132	0.027484	0.136587	0.39619	0.028141	0.129803	0.172619	0.379468	0.112727	0.046941	0.260624	-0.05148	0.081292	0.207874	0.236113	-0.05284	0.083665	0.323569	-0.03795	-0.39071	0.045439	0.371247	0.141639	1	0.082876	0.15525	0.057701	0.035926
Abhd17c	-0.02681	0.11006	0.140327	0.043377	0.093273	0.140271	0.161624	0.146208	0.066786	0.022215	0.090319	0.294951	0.152058	0.245627	0.185736	0.1144	0.141338	-0.00456	0.12282	0.072463	0.026154	0.265916	0.071038	0.045721	-0.11724	0.143594	0.015245	-0.00811	0.082876	1	-0.04202	0.141718	-0.10642
Golga7	-0.14207	-0.34369	-0.41379	0.416607	-0.56762	0.09378	-0.19617	-0.56063	0.189861	-0.03847	0.479995	-0.27724	0.158885	-0.17619	-0.06598	-0.3324	-0.40409	0.111464	-0.24984	-0.47228	-0.30334	-0.17668	-0.07864	-0.04157	-0.01922	-0.38061	0.018046	0.225429	0.15525	-0.04202	1	-0.4935	0.694985
Golga7b	0.030805	0.559462	0.588182	-0.43573	0.589984	-0.09231	0.121118	0.741723	0.129034	0.029495	-0.36607	0.472163	0.028968	0.322506	0.2798	0.603696	0.313964	-0.01469	0.272952	0.652084	0.537934	0.394809	0.206347	0.008797	-0.06137	0.484322	-0.01501	0.008886	0.057701	0.141718	-0.4935	1	-0.6349
Selk	-0.14418	-0.4032	-0.54208	0.482213	-0.68467	0.080042	-0.24525	-0.74534	0.067664	-0.04905	0.481871	-0.37838	0.129865	-0.21621	-0.14194	-0.39408	-0.49722	0.089522	-0.35596	-0.59908	-0.37527	-0.19583	-0.20846	-0.05396	-0.0494	-0.46071	0.012478	0.165178	0.035926	-0.10642	0.694985	-0.6349	1
