# Supplementary material for: Exploring the expression patterns of palmitoylating and de-palmitoylating enzymes in the mouse brain using the curated RNA-seq database BrainPalmSeq
Source: eLife. 2022 Jul 12;11:e75804. doi: 10.7554/eLife.75804 (PMC9365392; doi:10.7554/eLife.75804)
Supplement: Figure 5—source data 1. [file elife-75804-fig5-data1.xlsx]

## Sheet: Sheet1
Figure 5 - Source data 1. Cell type and regional gene expression of disease associated genes.
MouseBrain' Cell Type averages. Units: mean log2(counts per 10,000 + 1)
Cell type cluster	Average of Zdhhc8		Cell type cluster	Average of Zdhhc9		Cell type cluster	Average of Ppt1
Cerebellum neuron	0.143471		Cerebellum neuron	0.0871988		Cerebellum neuron	0.30134
Cortex/HC neuron	0.597211		Cortex/HC neuron	0.211973		Cortex/HC neuron	0.593212
Midbrain/hindbrain neuron	0.349014		Midbrain/hindbrain neuron	0.16847		Midbrain/hindbrain neuron	0.657118
Interneuron	0.212091		Interneuron	0.11977		Interneuron	0.661309
Olfactory neuron	0.142514		Olfactory neuron	0.0755938		Olfactory neuron	0.393298
Spinal cord neuron	0.180861		Spinal cord neuron	0.118366		Spinal cord neuron	0.5849
Astrocytes	0.0978262		Astrocytes	0.0536056		Astrocytes	0.531043
Ependymal	0.0775633		Ependymal	0.107594		Ependymal	0.438934
Macrophage	0.0427384		Macrophage	0.0865175		Macrophage	0.651869
Microglia	0.0457965		Microglia	0.0513632		Microglia	0.668626
Oligodendrocyte	0.169124		Oligodendrocyte	1.09164		Oligodendrocyte	0.565786
OPC	0.113478		OPC	0.100943		OPC	0.580241
Vascular	0.156		Vascular	0.128964		Vascular	0.369633
Rosenberg et al., 2018' Cell type averages. Units: mean log2(counts per 10,000 + 1)
Cell type cluster	Average of Zdhhc8		Cell type cluster	Average of Zdhhc9		Cell type cluster	Average of Ppt1
Cerebellum neuron	0.0694458		Cerebellum neuron	0.0680899		Cerebellum neuron	0.127098
Cortex/HC neuron	0.151279		Cortex/HC neuron	0.123048		Cortex/HC neuron	0.153272
Midbrain/hindbrain neuron	0.140827		Midbrain/hindbrain neuron	0.13074		Midbrain/hindbrain neuron	0.164842
Migrating interneuron	0.0967229		Migrating interneuron	0.0700068		Migrating interneuron	0.129744
Olfactory neuron	0.0976342		Olfactory neuron	0.110631		Olfactory neuron	0.218652
Spinal cord neuron	0.0607712		Spinal cord neuron	0.0934037		Spinal cord neuron	0.213086
Astrocyte	0.0348034		Astrocyte	0.0309306		Astrocyte	0.106233
Ependymal	0.0275909		Ependymal	0.0391167		Ependymal	0.0865965
Macrophage	0		Macrophage	0.0747205		Macrophage	0.0505457
Microglia	0.0647891		Microglia	0.0593374		Microglia	0.191544
Oligodendrocyte	0.0828316		Oligodendrocyte	0.294768		Oligodendrocyte	0.100387
OPC	0.0569101		OPC	0.0587521		OPC	0.103749
Vascular	0.0360227		Vascular	0.0654915		Vascular	0.068405
Sjöstedt et al 2020 regional expression. Units: pTPM
Brain Region	Zdhhc8		Brain Region	Zdhhc9		Brain Region	Ppt1
Amygdala	16.1		Amygdala	30.4		Amygdala	91.1
Basal ganglia	11.4		Basal ganglia	48.1		Basal ganglia	129.3
Cerebellum	5.3		Cerebellum	24.9		Cerebellum	140
Cerebral cortex	19.4		Cerebral cortex	47.5		Cerebral cortex	99.7
Corpus callosum	7.1		Corpus callosum	109.4		Corpus callosum	84
Hippocampal formation	13.8		Hippocampal formation	43.3		Hippocampal formation	103.6
Hypothalamus	9.3		Hypothalamus	41.5		Hypothalamus	120.2
Midbrain	6.5		Midbrain	54.2		Midbrain	140
Olfactory region	10.1		Olfactory region	39.4		Olfactory region	119.3
Pituitary gland	4.3		Pituitary gland	5.1		Pituitary gland	38.6
Pons and medulla	5.5		Pons and medulla	37.3		Pons and medulla	125.9
Retina	2.2		Retina	24.8		Retina	74.1
Thalamus	6.4		Thalamus	55.6		Thalamus	116.7
