# Supplementary material for: Exploring the expression patterns of palmitoylating and de-palmitoylating enzymes in the mouse brain using the curated RNA-seq database BrainPalmSeq
Source: eLife. 2022 Jul 12;11:e75804. doi: 10.7554/eLife.75804 (PMC9365392; doi:10.7554/eLife.75804)
Supplement: Figure 6—source data 1. [file elife-75804-fig6-data1.xlsx]

## Sheet: Sheet1
Figure 6 - Source data 1 (Figure 6A). Zdhhc9 expression in oligodendrocytes, Marques et al., 2016.
Cell type	OPC	COP	NFOL1	NFOL2	MFOL1	MFOL2	MOL1	MOL2	MOL3	MOL4	MOL5	MOL6
Zdhhc9 expression	0.308117	0.457177	0.738828	1.42512	2.53416	2.22066	1.75332	1.46781	1.54179	1.60974	1.64917	1.56716
