# Supplementary material for: Exploring the expression patterns of palmitoylating and de-palmitoylating enzymes in the mouse brain using the curated RNA-seq database BrainPalmSeq
Source: eLife. 2022 Jul 12;11:e75804. doi: 10.7554/eLife.75804 (PMC9365392; doi:10.7554/eLife.75804)
Supplement: Figure 6—source data 2. [file elife-75804-fig6-data2.xlsx]

## Sheet: Sheet1
Figure 6 - Source data 2 (Figure 6B, C): S-palmitoylation substrates enriched in myelinating and mature oligodendrocytes
Filtered for Mus Musculus & UniProt reviewed.
MFOL and MOL enriched genes identified from Marques et al., 2016. Supplementary table S1 junctions 5-12 (https://www.science.org/doi/suppl/10.1126/science.aaf6463/suppl_file/aaf6463_table_s1.xlsx)
442 genes		156 genes		30 genes
MFOL and MOL enriched genes		MFOL and MOL enriched SwissPalm Annotated		MFOL and MOL enriched SwissPalm GO Annotated 'Myelin Sheath'
Ctps		Aacs		Atp1a1
Tmem141		Abhd17b		Sirt2
Opalin		Abca8a		Pmp22
Ttyh1		Ablim2		Cldn11
Plekha1		Scd1		Mbp
Ddr1		Aspa		Mobp
Cd9		Aig1		Tubb4a
Sirt2		Gpt		Gjc3
Arpc1b		Lap3		Mog
Fam214a		Cnp		Fscn1
Mcam		Anln		Mag
Nudt4		Anxa5		Glul
Clic4		Arpc1b		Ndrg1
Tspan2		Arc		Sept8
Serinc5		Atp1a1		Gsn
Prom1		Atp1a2		Atp1a2
Sh3gl3		Atp1a3		Gnb4
Plat		Bsn		Igsf8
Kndc1		Car2		Tspan2
Olig1		Capn5		Car2
Lpar1		Cpd		Serinc5
Grb14		Cd63		Sept4
Sema6a		Cd82		Tkt
Rap2a		Cd9		Syn2
Mag		Cers2		Plp1
Slk		Ugt8a		Cnp
Slc9a3r2		Cmtm5		Phgdh
9630013A20Rik		Cldn11		Atp1a3
Gpr17		Clic4		Rap1a
Tspan15		Cyp51		Eno2
Igsf8		Csrp1
Tssc4		Gjc3
Lgi3		Daam1
Arap2		Brinp1
Klf13		Gad1
St8sia3		Gad2
Rims2		Urod
Prickle1		Tkt
Ick		Hsd17b7
Clmn		Dhcr24
Daam1		Qdpr
Phyhipl		Dock4
Onecut2		Ddx39b
Bmp1		Epb4.1l2
Adamts4		Slc1a2
Ablim2		Ece1
Mobp		Efnb3
Thbs3		Efr3b
Zdhhc9		Elovl1
Capn5		Elovl5
Apod		Endod1
Sepp1		Eno2
S100b		Sqle
Trf		0610007P14Rik
Anln		Lss
Hapln2		Far1
Glul		Fdps
Ndrg1		Fscn1
Sez6l2		Fyn
Klk6		Gamt
Gng11		Gatm
"Sept8"		Gnb4
Sec11c		Gabrb2
Car2		Gabrg2
Spock3		Gsn
Serpinb1a		Glul
Pmp22		Gnai1
Zdhhc20		Golga7
Cpd		Gpd1
Anxa5		Gpr17
Slco3a1		Gpr37
Enpp6		Gstm7
Gatm		Gda
Cd59a		Hcn2
B3galt5		Hn1l
Mgst3		Hspa12a
Tubb4a		Idh1
Etv1		Idi1
Ttyh2		Igsf8
Psat1		Serpinb1a
Elovl5		Kcnj10
Aspa		Kalrn
Plin3		Camk2a
Usp31		Kcna6
Litaf		Erbb2ip
Gjb1		Lgi3
Cntn2		Lhfpl2
Kctd3		Litaf
S100a1		Lpar1
Prr5l		Mag
Mid1ip1		Mbp
Pla2g16		Mgll
Dbndd2		Mgst3
S100a16		Mobp
Dpy19l1		Mog
S100a13		Marcksl1
S100a6		Mcam
Edil3		Plp1
Gstm7		Nceh1
Kctd13		Ndrg1
Chn2		Ndrg2
Mpzl1		Gap43
Frmd4a		Neu4
Gjc3		Npc1
Bcas1		Pcyt2
Pik3r3		Pdcd4
Epb4.1l2		Pdxdc1
Ptpre		Atp2b4
Sgk1		Fam213b
Pdcd4		Phyhipl
Dct		Pmp22
Tmem108		Ppp1cc
Fam13c		Ppm1h
Fyn		Prrt2
Ppfibp1		Ctps
Trio		Rgs7bp
Grlf1		Rap1a
Neu4		Rap2a
Ust		Rgs16
Tnr		Rhoc
Vcan		Rims2
Sox4		Rit2
Sox2		Rras2
Lrrc42		Ryr2
Zfp365		S100a6
Snx18		Slc12a2
Ptgds		Sccpdh
Rgs16		Sept4
Sez6l		Sept8
Slc1a1		Phgdh
Panx1		Serinc5
Rnd2		Psat1
Tcf7l2		Sirt2
Tril		Slk
Ctnnal1		Slco3a1
Pnpla3		Acat2
Rasgef1b		Srcin1
Opcml		Sv2b
Lcorl		Syn2
Ece1		Synpr
Mycl		Tubb4a
Brca1		Tnr
Dock4		Tmem2
Tmem132b		Trf
Adam11		Trio
Cyp51		Tspan15
Tmem2		Tspan2
Gnb4		Ttyh1
Cmtm5		Ttyh2
Rras2		Unc13a
Enpp2		Vamp3
Slc12a2		Slc32a1
Dhcr24		Vsnl1
Marcksl1		Zdhhc20
Fam107b		Zdhhc9
Gjc2		Slc8a2
Eml1
Cers2
Elovl6
Gpr37
Gamt
Mmd2
Plp1
Gsn
Ugt8a
Tmem125
Idi1
Acat2
Fdps
Sox2ot
Qdpr
Paqr8
Lap3
Lss
Rap1a
Tmeff2
Il23a
Elovl1
Gng12
Birc2
Mbp
Elovl7
Tppp3
Luzp2
Fscn1
Cldn11
Mgll
Rab33a
Col9a3
Golga7
Mal
Evi2a-evi2b
Wfdc18
Efhd1
Gprasp2
Resp18
Zcchc12
Nmral1
Scg2
Plxnb1
Tro
Sst
6330403K07Rik
Pnck
Tmem130
Prkar1b
Gap43
Unc80
Rgs17
Ncald
Syt4
Rab3c
Syn2
Pgm2l1
Hap1
Gng2
Gabra1
Gda
Rit2
Tmem59l
Cd200
Pcp4
Nsg2
Vsnl1
Myt1l
Pcsk2
Erc2
A030009H04Rik
Nsg1
Ndrg2
Atp1a3
Phgdh
A730017C20Rik
Sccpdh
Gltp
Sqle
Mob3b
Chst2
Fez1
Mog
Scrg1
Reep3
Sema5a
Sc5d
Efr3b
Far1
Idh1
Il33
Apoe
Cd63
Jph4
C030029H02Rik
Ccp110
Tmod1
Bin1
Csrp1
Neat1
Grm3
Erbb2ip
Spock1
Faim2
Kcna1
Dusp26
Pls1
Nfia
Kcna6
Pex5l
Sema6d
Cep97
Gpt
Olfml1
Abca8a
Aebp1
Synpr
Npsr1
Cerk
Fbxo7
Fbxl5
Sbf1
Fosb
Dusp1
Btg2
Dnajb1
Klf4
Zfp36
Tnfaip6
Hspa1a
Arrdc3
"Sept4"
Tob1
Arc
Jund
Phldb1
Junb
Ddit4
Hspa1b
Trim59
Erf
Ddit3
Desi1
Ier2
Egr2
Pim3
Ninj2
Cdkn1c
Rab37
Aacs
Gpd1
Hn1l
Me1
Tmem254b_loc3
Snca
Tmem254b_loc1
Apbb2
Tmem254b_loc2
Hopx
Kcnj10
Pdlim2
Srd5a1
Hcn2
Pcyt2
Tsix
Car14
0610007P14Rik
Rhoc
Hsd17b7
Atp1a2
Pdxdc1
Nceh1
Pop4
Commd6
Slc29a3
Eno2
R3hdm1
Atp1a1
Ndufaf2
Mrpl43
Sepw1
Fgfr2
Plekhb1
Cryab
Dnajb2
Npc1
Scd1
Cdk19
Gnai1
Cyp2j12
Carhsp1
Tmcc3
Dock9
Slain1
Ppp1cc
Tkt
Cd82
Galnt6
Efnb3
Ddx39b
Tmem229a
Ypel2
Endod1
Ppp1r16b
Insig1
Srcin1
2810468N07Rik
Abhd17b
Ttr
Slc1a2
Arsg
Kctd4
Pcolce2
E330020D12Rik
Cystm1
Mt3
C630043F03Rik
Serpind1
Apln
Skap2
Aig1
9330117O12Rik
Tmem109
Urod
Schip1
Fam213b
A330049N07Rik
Tmem144
Atg4c
Lhfpl2
Polr3e
Cdk5rap2
Rap1gds1
Frmd8
Fa2h
Josd2
Cnp
Vamp3
Pllp
Gad2
Dqx1
Nrxn3
Mef2c
Arpp21
Ryr2
Gad1
Nrgn
Camk2a
Rgs4
Rgs7bp
Rasgrp1
Hspa12a
Pbx1
Gabrg2
Chst1
Vcl
Bsn
Slc32a1
Kalrn
2900060B14Rik
Gabrb2
Npcd
Prrt2
Actl6b
Gm410
Brinp1
Snord68
5031426D15Rik
Cwc22
D430041D05Rik
Zbtb16
Slc8a2
Unc13a
Camkk2
Sdr42e1
Zbtb38
Pcdh15
Rnf150
Atp2b4
Cers4
Csmd1
Ttn
Ppm1h
Sv2b
Zfp71-rs1
