# Supplementary material for: Exploring the expression patterns of palmitoylating and de-palmitoylating enzymes in the mouse brain using the curated RNA-seq database BrainPalmSeq
Source: eLife. 2022 Jul 12;11:e75804. doi: 10.7554/eLife.75804 (PMC9365392; doi:10.7554/eLife.75804)
Supplement: Figure 6—source data 3. [file elife-75804-fig6-data3.xlsx]

## Sheet: Figure 6 NSB
Figure 6 - Source data 3 (Figure 6). Acyl Rac quantification for Zdhhc9 substrate validation
MOBP
CONTROL							PLUS ZDHHC9/GOLGA7						CONTROL				PLUS ZDHHC9/GOLGA7
date	Blot	Raw intensity- Palm fraction	Raw intensity- NSB fraction	NSB subtracted from Palm fraction	Raw intensity -Unpalm fraction		Blot	Raw intensity- Palm fraction	Raw intensity- NSB fraction	NSB subtracted from Palm fraction	Raw intensity -Unpalm fraction		Blot	Ratio Palm Fraction	Ratio Unpalm fraction		Blot	Ratio Palm Fraction	Ratio Unpalm fraction
Jul 08-1	Source Data 4, 5	16511.3	3136.69	13374.6	14513		Blot 1	15817	18.121	15798.9	705.678		Blot 1	0.479589	0.520411		Blot 1	0.957243	0.0427565
Jul 08-2	Source Data 6, 7	8506.93	1701.96	6804.97	9551.1		Blot 2	10388.2	0	10388.2	314.899		Blot 2	0.416052	0.583948		Blot 2	0.970579	0.0294212
Jul 08-3	Source Data 8, 9	8707.42	4266.38	4441.04	11600.5		Blot 3	14239.2	119.536	14119.7	1283.99		Blot 3	0.276846	0.723154		Blot 3	0.916644	0.0833562
Nov 02	Source Data 10, 11	4561.23	464.577	4096.65	10130.4		Blot 4	2136.62	0	2136.62	1055.55		Blot 4	0.287947	0.712053		Blot 4	0.669332	0.330668
PLP1
CONTROL							PLUS ZDHHC9/GOLGA7						CONTROL				PLUS ZDHHC9/GOLGA7
date	Blot	Raw intensity- Palm fraction	Raw intensity- NSB fraction	NSB subtracted from Palm fraction	Raw intensity -Unpalm fraction		Blot	Raw intensity- Palm fraction	Raw intensity- NSB fraction	NSB subtracted from Palm fraction	Raw intensity -Unpalm fraction		Blot	Ratio Palm Fraction	Ratio Unpalm fraction		Blot	Ratio Palm Fraction	Ratio Unpalm fraction
Mar 24	Source data 22, 23	14805.1	689.163	14115.9	3697.64		Blot 1	16067	115.435	15951.6	2251.57		Blot 1	0.792425	0.207575		Blot 1	0.876309	0.123691
Jun 26-1	Source data 18, 19	8200.9	319.385	7881.52	624.234		Blot 2	68465	0	68465	287.456		Blot 2	0.92661	0.0733896		Blot 2	0.995819	0.00418103
Jun 26-3	Source data 20, 21	57354.9	223.749	57131.2	14822.4		Blot 3	28333.5	233.335	28100.2	1860.71		Blot 3	0.794	0.206		Blot 3	0.937895	0.0621046
Jun 19	Source data 16, 17	61552	0	61552	7033.46		Blot 4	45366.5	0	45366.5	143.971		Blot 4	0.89745	0.10255		Blot 4	0.996837	0.00316347
Feb 5	Source data 12, 13	34091.6	0	34091.6	8037.45		Blot 5	54426.6	0	54426.6	4345.9		Blot 5	0.809218	0.190782		Blot 5	0.926056	0.0739445
Jul 08	Source data 14, 15	22341.2	226.021	22115.2	4318.1		Blot 6	16246.9	198.364	16048.6	1357.74		Blot 6	0.836642	0.163358		Blot 6	0.921997	0.0780028
CNP
CONTROL							PLUS ZDHHC9/GOLGA7						CONTROL				PLUS ZDHHC9/GOLGA7
date	Blot	Raw intensity- Palm fraction	Raw intensity- NSB fraction	NSB subtracted from Palm fraction	Raw intensity -Unpalm fraction		Blot	Raw intensity- Palm fraction	Raw intensity- NSB fraction	NSB subtracted from Palm fraction	Raw intensity -Unpalm fraction		Blot	Ratio Palm Fraction	Ratio Unpalm fraction		Blot	Ratio Palm Fraction	Ratio Unpalm fraction
Jul 8	Source data 24, 25	13561.6	1055.06	12506.5	24209.1		Blot 1	9678.86	243.021	9435.84	11295.1		Blot 1	0.340632	0.659368		Blot 1	0.455158	0.544842
2021-08-11	Source data 26, 27	8927.59	42.121	8885.47	9851.69		Blot 2	2826.52	120.95	2705.57	13127.1		Blot 2	0.474216	0.525784		Blot 2	0.170885	0.829115
Aug 22	Source data 28, 29	3207.91	0	3207.91	9338.68		Blot 3	10317.2	185.778	10131.4	8569.93		Blot 3	0.25568	0.74432		Blot 3	0.541749	0.458251
Jun 26	Source data 30, 31	2711.84	0	2711.84	9775.38		Blot 4	8319.86	0	8319.86	11080.6		Blot 4	0.217169	0.782831		Blot 4	0.428849	0.571151

## Sheet: Figure 6
Figure 6 - Source data 3 (Figure 6). Acyl Rac quantification for Zdhhc9 substrate validation
MOBP
CONTROL							PLUS ZDHHC9/GOLGA7						CONTROL				PLUS ZDHHC9/GOLGA7
date	Blot	Raw intensity- Palm fraction	Raw intensity- NSB fraction	NSB subtracted from Palm fraction	Raw intensity -Unpalm fraction		Blot	Raw intensity- Palm fraction	Raw intensity- NSB fraction	NSB subtracted from Palm fraction	Raw intensity -Unpalm fraction		Blot	Ratio Palm Fraction	Ratio Unpalm fraction		Blot	Ratio Palm Fraction	Ratio Unpalm fraction
Jul 08-1	Source Data 4, 5	16511.3	3136.69	13374.6	14513		Blot 1	15817	18.121	15798.9	705.678		Blot 1	0.532204	0.467796		Blot 1	0.95729	0.0427096
Jul 08-2	Source Data 6, 7	8506.93	1701.96	6804.97	9551.1		Blot 2	10388.2	0	10388.2	314.899		Blot 2	0.471088	0.528912		Blot 2	0.970579	0.0294212
Jul 08-3	Source Data 8, 9	8707.42	4266.38	4441.04	11600.5		Blot 3	14239.2	119.536	14119.7	1283.99		Blot 3	0.428769	0.571231		Blot 3	0.917286	0.0827143
Nov 02	Source Data 10, 11	4561.23	464.577	4096.65	10130.4		Blot 4	2136.62	0	2136.62	1055.55		Blot 4	0.310464	0.689536		Blot 4	0.669332	0.330668
PLP1
CONTROL							PLUS ZDHHC9/GOLGA7						CONTROL				PLUS ZDHHC9/GOLGA7
date	Blot	Raw intensity- Palm fraction	Raw intensity- NSB fraction	NSB subtracted from Palm fraction	Raw intensity -Unpalm fraction		Blot	Raw intensity- Palm fraction	Raw intensity- NSB fraction	NSB subtracted from Palm fraction	Raw intensity -Unpalm fraction		Blot	Ratio Palm Fraction	Ratio Unpalm fraction		Blot	Ratio Palm Fraction	Ratio Unpalm fraction
Mar 24	Source data 22, 23	14805.1	689.163	14115.9	3697.64		Blot 1	16067	115.435	15951.6	2251.57		Blot 1	0.800157	0.199843		Blot 1	0.877088	0.122912
Jun 26-1	Source data 18, 19	8200.9	319.385	7881.52	624.234		Blot 2	68465	0	68465	287.456		Blot 2	0.929266	0.0707336		Blot 2	0.995819	0.00418103
Jun 26-3	Source data 20, 21	57354.9	223.749	57131.2	14822.4		Blot 3	28333.5	233.335	28100.2	1860.71		Blot 3	0.794639	0.205361		Blot 3	0.938375	0.0616247
Jun 19	Source data 16, 17	61552	0	61552	7033.46		Blot 4	45366.5	0	45366.5	143.971		Blot 4	0.89745	0.10255		Blot 4	0.996837	0.00316347
Feb 5	Source data 12, 13	34091.6	0	34091.6	8037.45		Blot 5	54426.6	0	54426.6	4345.9		Blot 5	0.809218	0.190782		Blot 5	0.926056	0.0739445
Jul 08	Source data 14, 15	22341.2	226.021	22115.2	4318.1		Blot 6	16246.9	198.364	16048.6	1357.74		Blot 6	0.838027	0.161973		Blot 6	0.922876	0.0771238
CNP
CONTROL							PLUS ZDHHC9/GOLGA7						CONTROL				PLUS ZDHHC9/GOLGA7
date	Blot	Raw intensity- Palm fraction	Raw intensity- NSB fraction	NSB subtracted from Palm fraction	Raw intensity -Unpalm fraction		Blot	Raw intensity- Palm fraction	Raw intensity- NSB fraction	NSB subtracted from Palm fraction	Raw intensity -Unpalm fraction		Blot	Ratio Palm Fraction	Ratio Unpalm fraction		Blot	Ratio Palm Fraction	Ratio Unpalm fraction
Jul 8	Source data 24, 25	13561.6	1055.06	12506.5	24209.1		Blot 1	9678.86	243.021	9435.84	11295.1		Blot 1	0.35905	0.64095		Blot 1	0.461471	0.538529
2021-08-11	Source data 26, 27	8927.59	42.121	8885.47	9851.69		Blot 2	2826.52	120.95	2705.57	13127.1		Blot 2	0.475396	0.524604		Blot 2	0.177171	0.822829
Aug 22	Source data 28, 29	3207.91	0	3207.91	9338.68		Blot 3	10317.2	185.778	10131.4	8569.93		Blot 3	0.25568	0.74432		Blot 3	0.546256	0.453744
Jun 26	Source data 30, 31	0.217169	0	0.217169	0.782831		Blot 4	0.428849	0	0.428849	0.571151		Blot 4	0.217169	0.782831		Blot 4	0.428849	0.571151
		2711.84			9775.38			8319.86			11080.6
			POSSIBLE ERROR IN COPY OVER - CORRECT VALUE UNDERNEATH
