# Supplementary material for: Exploring the expression patterns of palmitoylating and de-palmitoylating enzymes in the mouse brain using the curated RNA-seq database BrainPalmSeq
Source: eLife journal article supplement (doi:10.7554/elife.75804), 2022-07-12
Supplement: supp [file elife-75804-supp-v1.zip]

Archive with 18 entries (18 files):
- elife_poa_e75804_Supplementary_file_1.xlsx
- elife_poa_e75804_Figure_1_figure_supplement_1.pdf
- elife_poa_e75804_Figure_1_figure_supplement_2.pdf
- elife_poa_e75804_Figure_2_figure_supplement_1.pdf
- elife_poa_e75804_Figure_3_figure_supplement_1.pdf
- elife_poa_e75804_Figure_4_figure_supplement_1.pdf
- elife_poa_e75804_Figure_4_figure_supplement_2.pdf
- elife_poa_e75804_Figure_4_figure_supplement_3.pdf
- elife_poa_e75804_Figure_5_figure_supplement_1.pdf
- elife_poa_e75804_Figure_6_figure_supplement_1.pdf
- elife_poa_e75804_Figure_6_figure_supplement_2.pdf
- elife_poa_e75804_Figure_1_source_data_1.zip
- elife_poa_e75804_Figure_2_source_data_1.zip
- elife_poa_e75804_Figure_3_source_data_1.zip
- elife_poa_e75804_Figure_4_source_data_1.zip
- elife_poa_e75804_Figure_6_source_data_1.zip
- elife_poa_e75804_Figure_5_source_data_1.zip
- elife_poa_e75804_Transparent_Reporting_File.pdf
