# Supplementary material for: Exploring the expression patterns of palmitoylating and de-palmitoylating enzymes in the mouse brain using the curated RNA-seq database BrainPalmSeq
Source: eLife journal article supplement (doi:10.7554/elife.75804), 2022-07-12
Supplement: supp [file elife-75804-supp-v1.zip › elife_poa_e75804_Figure_1_figure_supplement_2.pdf]

Figure 1-figure supplement 2

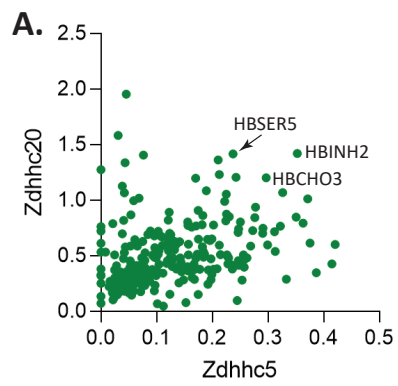

HBSER5: Serotonergic neurons, hindbrain  
HBINH2: Inhibitory neurons, hindbrain  
HBCHO3: Cholinergic afferent nuclei of  
cranial nerves VI-XII

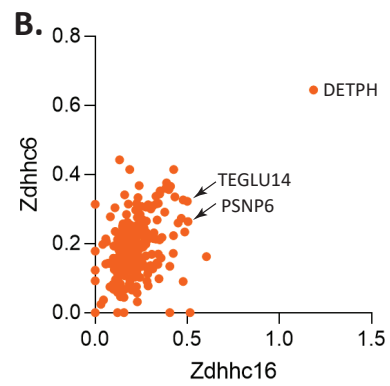

DETPH: Non-glutamatergic neuroblasts thalamus  
TEGLU14: Excitatory neurons, cerebral cortex  
PSNP6: Non-peptidergic dorsal root ganglia neuron
