# Supplementary material for: Exploring the expression patterns of palmitoylating and de-palmitoylating enzymes in the mouse brain using the curated RNA-seq database BrainPalmSeq
Source: eLife journal article supplement (doi:10.7554/elife.75804), 2022-07-12
Supplement: supp [file elife-75804-supp-v1.zip › elife_poa_e75804_Figure_5_figure_supplement_1.pdf]

Figure 5-figure supplement 1

**A.**

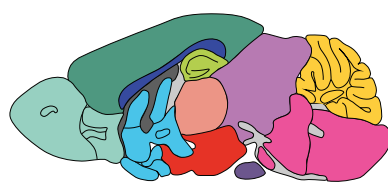

□ Olfactory region  
□ Cortex  
□ Corpus Callosum  
□ Basal Ganglia  
□ Thalamus  
□ Pituitary gland

□ Hippocampus  
□ Hypothalamus  
□ Midbrain  
□ Cerebellum  
□ Pons and medulla
