# Supplementary material for: Exploring the expression patterns of palmitoylating and de-palmitoylating enzymes in the mouse brain using the curated RNA-seq database BrainPalmSeq
Source: eLife journal article supplement (doi:10.7554/elife.75804), 2022-07-12
Supplement: supp [file Figure 6 - Figure supplement 2 -source data 1.xlsx]

## Sheet: Sheet1
Figure 6 - Figure Supplement 2 - Source data 1
MOBP
WT						Zdhhc9 KO						WT				Zdhhc9 KO
date	Raw intensity- Palm fraction	Raw intensity- NSB fraction	NSB subtracted from Palm fraction	Raw intensity -Unpalm fraction		Blot	Raw intensity- Palm fraction	Raw intensity- NSB fraction	NSB subtracted from Palm fraction	Raw intensity -Unpalm fraction		Blot	Ratio Palm Fraction	Ratio Unpalm fraction		Blot	Ratio Palm Fraction	Ratio Unpalm fraction
WT1	15083.8	0	15083.8	9301.88		KO1	7717.23	0	7717.23	8115.93		Blot 1	0.618551	0.381449		Blot 1	0.487409	0.512591
WT2	12326.2	0	12326.2	10590.1		KO2	21649.3	0	21649.3	11281.5		Blot 2	0.537881	0.462119		Blot 2	0.657419	0.342581
						KO3	29924.3	0	29924.3	17040.2						Blot 3	0.637169	0.362831
PLP1
WT						Zdhhc9 KO						WT				Zdhhc9 KO
date	Raw intensity- Palm fraction	Raw intensity- NSB fraction	NSB subtracted from Palm fraction	Raw intensity -Unpalm fraction		Blot	Raw intensity- Palm fraction	Raw intensity- NSB fraction	NSB subtracted from Palm fraction	Raw intensity -Unpalm fraction		Blot	Ratio Palm Fraction	Ratio Unpalm fraction		Blot	Ratio Palm Fraction	Ratio Unpalm fraction
WT1	30483.1	0	30483.1	35551		KO1	21533.1	0	21533.1	19396.1		Blot 1	46.1627	53.8373		Blot 1	52.6105	47.3895
WT2	10778.5	0	10778.5	10630.2		KO2	17824.6	0	17824.6	17702.7		Blot 2	50.3462	49.6538		Blot 2	50.1716	49.8284
						KO3	24669.7	0	24669.7	21124.2						Blot 3	53.8712	46.1288
CNP
WT						Zdhhc9 KO						WT				Zdhhc9 KO
date	Raw intensity- Palm fraction	Raw intensity- NSB fraction	NSB subtracted from Palm fraction	Raw intensity -Unpalm fraction		Blot	Raw intensity- Palm fraction	Raw intensity- NSB fraction	NSB subtracted from Palm fraction	Raw intensity -Unpalm fraction		Blot	Ratio Palm Fraction	Ratio Unpalm fraction		Blot	Ratio Palm Fraction	Ratio Unpalm fraction
WT1	29785.7	0	29785.7	22102.9		KO1	24246.7	0	24246.7	21806.1		Blot 1	57.4032	42.5968		Blot 1	52.6498	47.3502
WT2	14502.1	0	14502.1	16657.1		KO2	33893.6	0	33893.6	33449.9		Blot 2	46.5419	53.4581		Blot 2	50.3294	49.6706
						KO3	32067.8	0	32067.8	31828.3						Blot 3	50.1874	49.8126
