# Supplementary figures and images for: Exploring the expression patterns of palmitoylating and de-palmitoylating enzymes in the mouse brain using the curated RNA-seq database BrainPalmSeq
Source: eLife journal article supplement (doi:10.7554/elife.75804), 2022-07-12

Figure 1-figure supplement 1

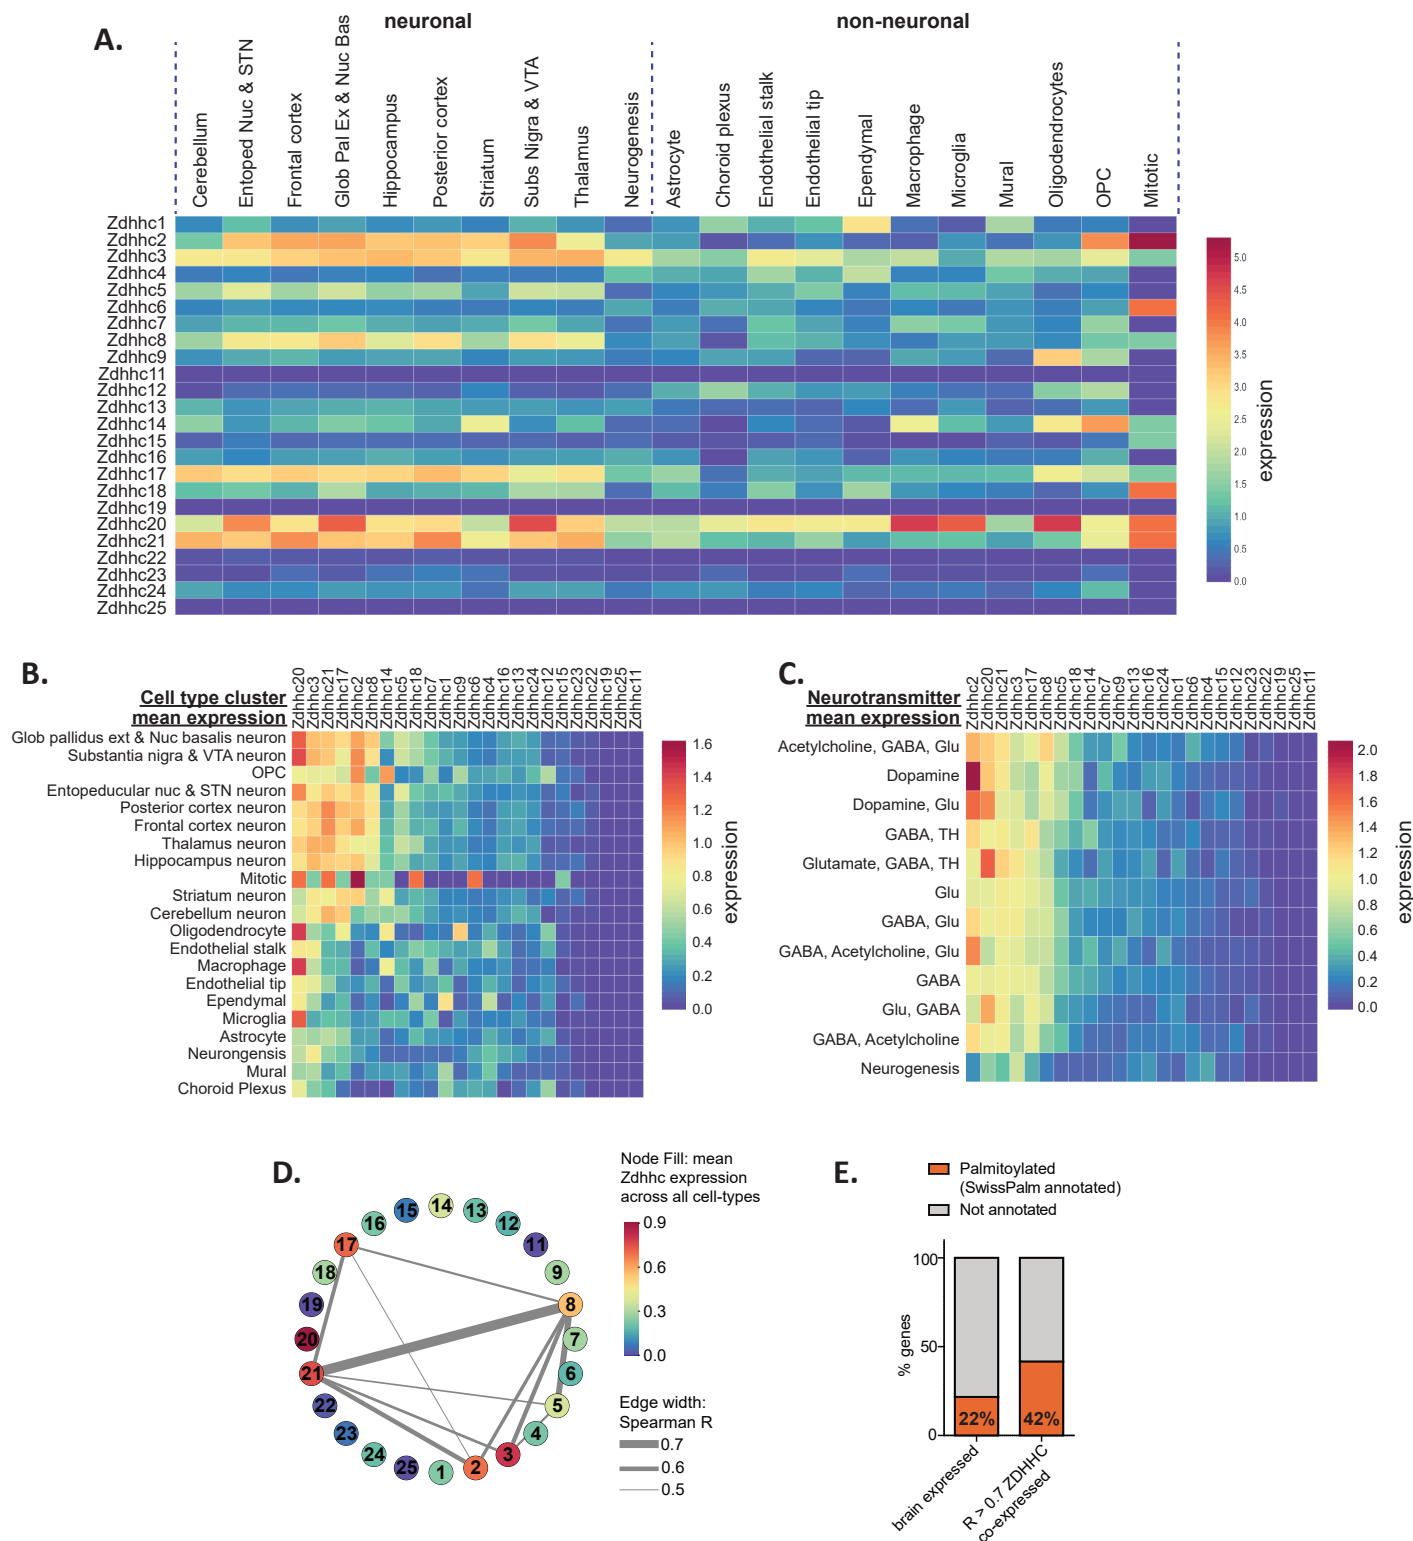

Supplement: supp [file elife-75804-supp-v1.zip › elife_poa_e75804_Figure_1_figure_supplement_1.pdf]

Figure 2-figure supplement 1

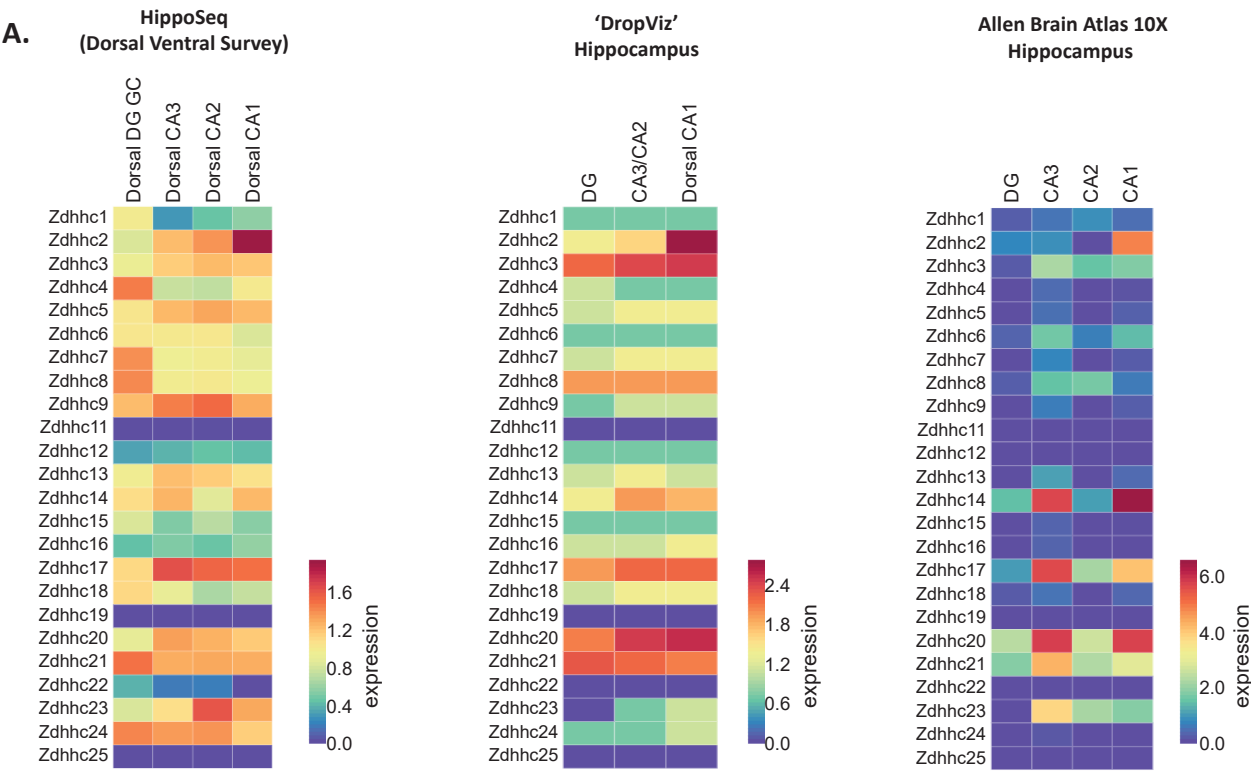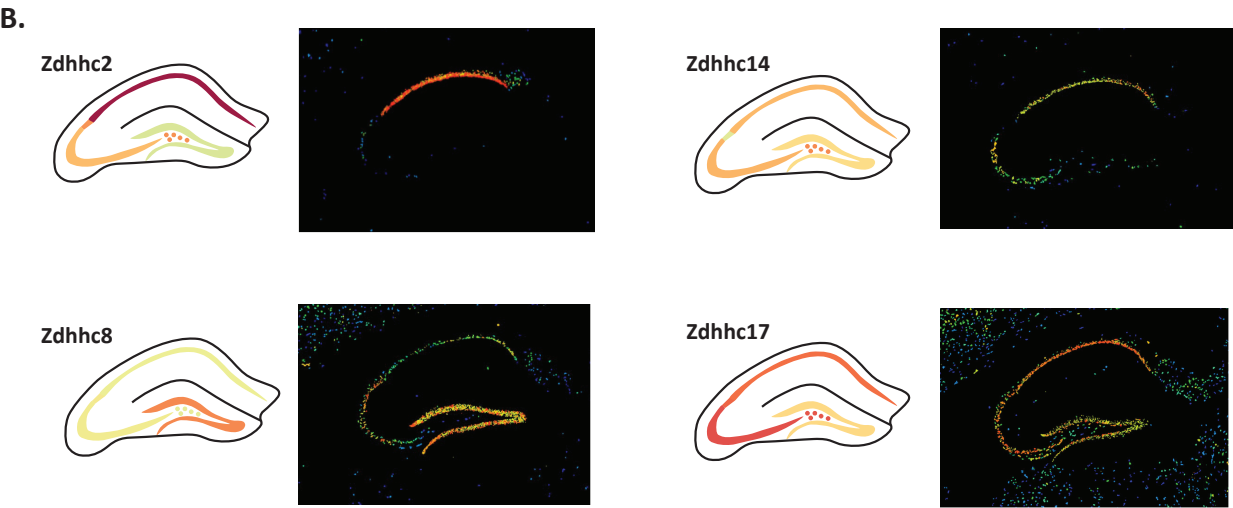

Supplement: supp [file elife-75804-supp-v1.zip › elife_poa_e75804_Figure_2_figure_supplement_1.pdf]

Figure 3-figure supplement 1

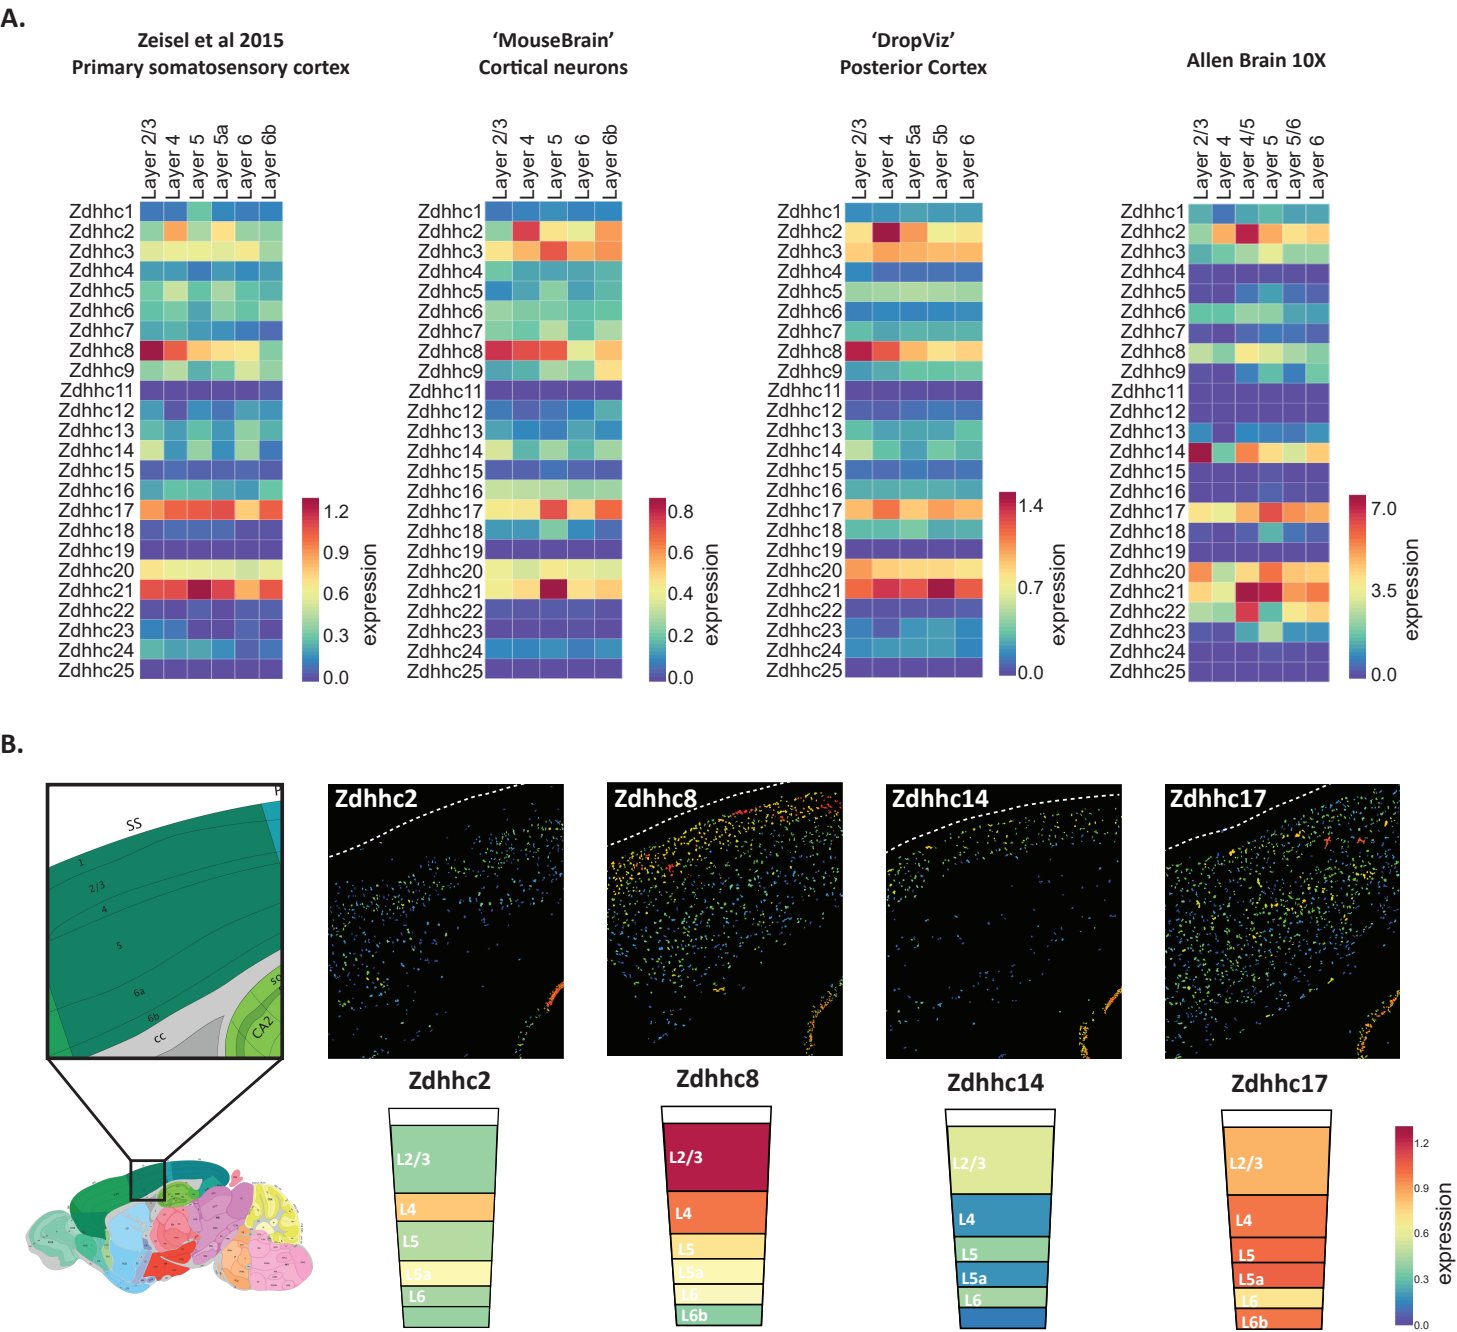

Supplement: supp [file elife-75804-supp-v1.zip › elife_poa_e75804_Figure_3_figure_supplement_1.pdf]

Figure 4-figure supplement 1

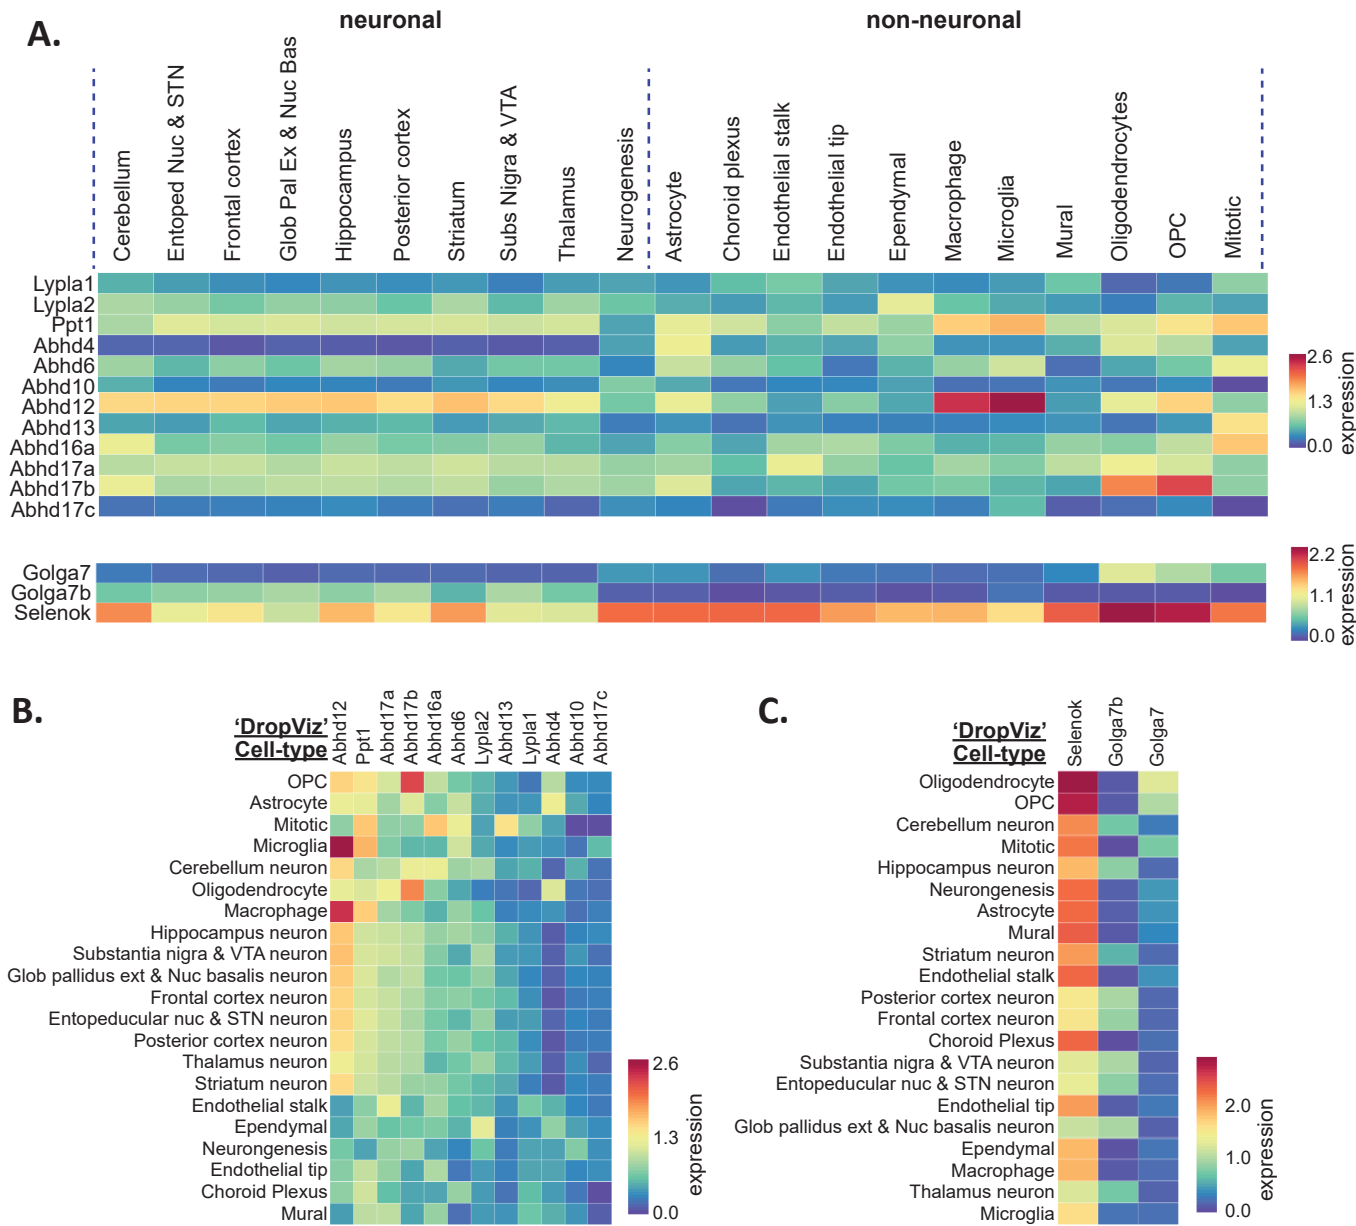

Supplement: supp [file elife-75804-supp-v1.zip › elife_poa_e75804_Figure_4_figure_supplement_1.pdf]

Figure 4-figure supplement 2

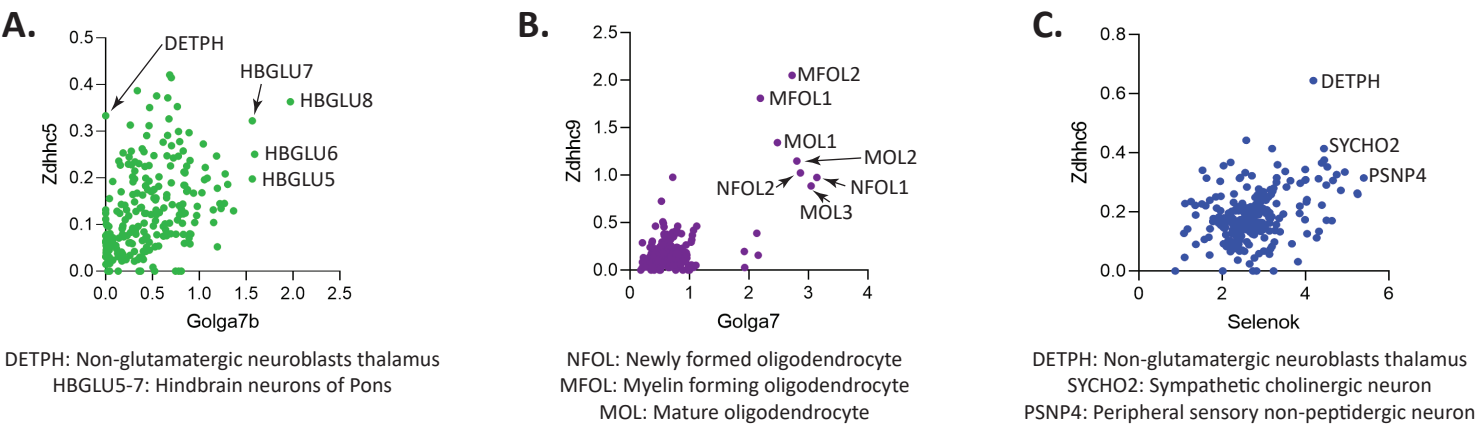

Supplement: supp [file elife-75804-supp-v1.zip › elife_poa_e75804_Figure_4_figure_supplement_2.pdf]

Figure 4-figure supplement 3

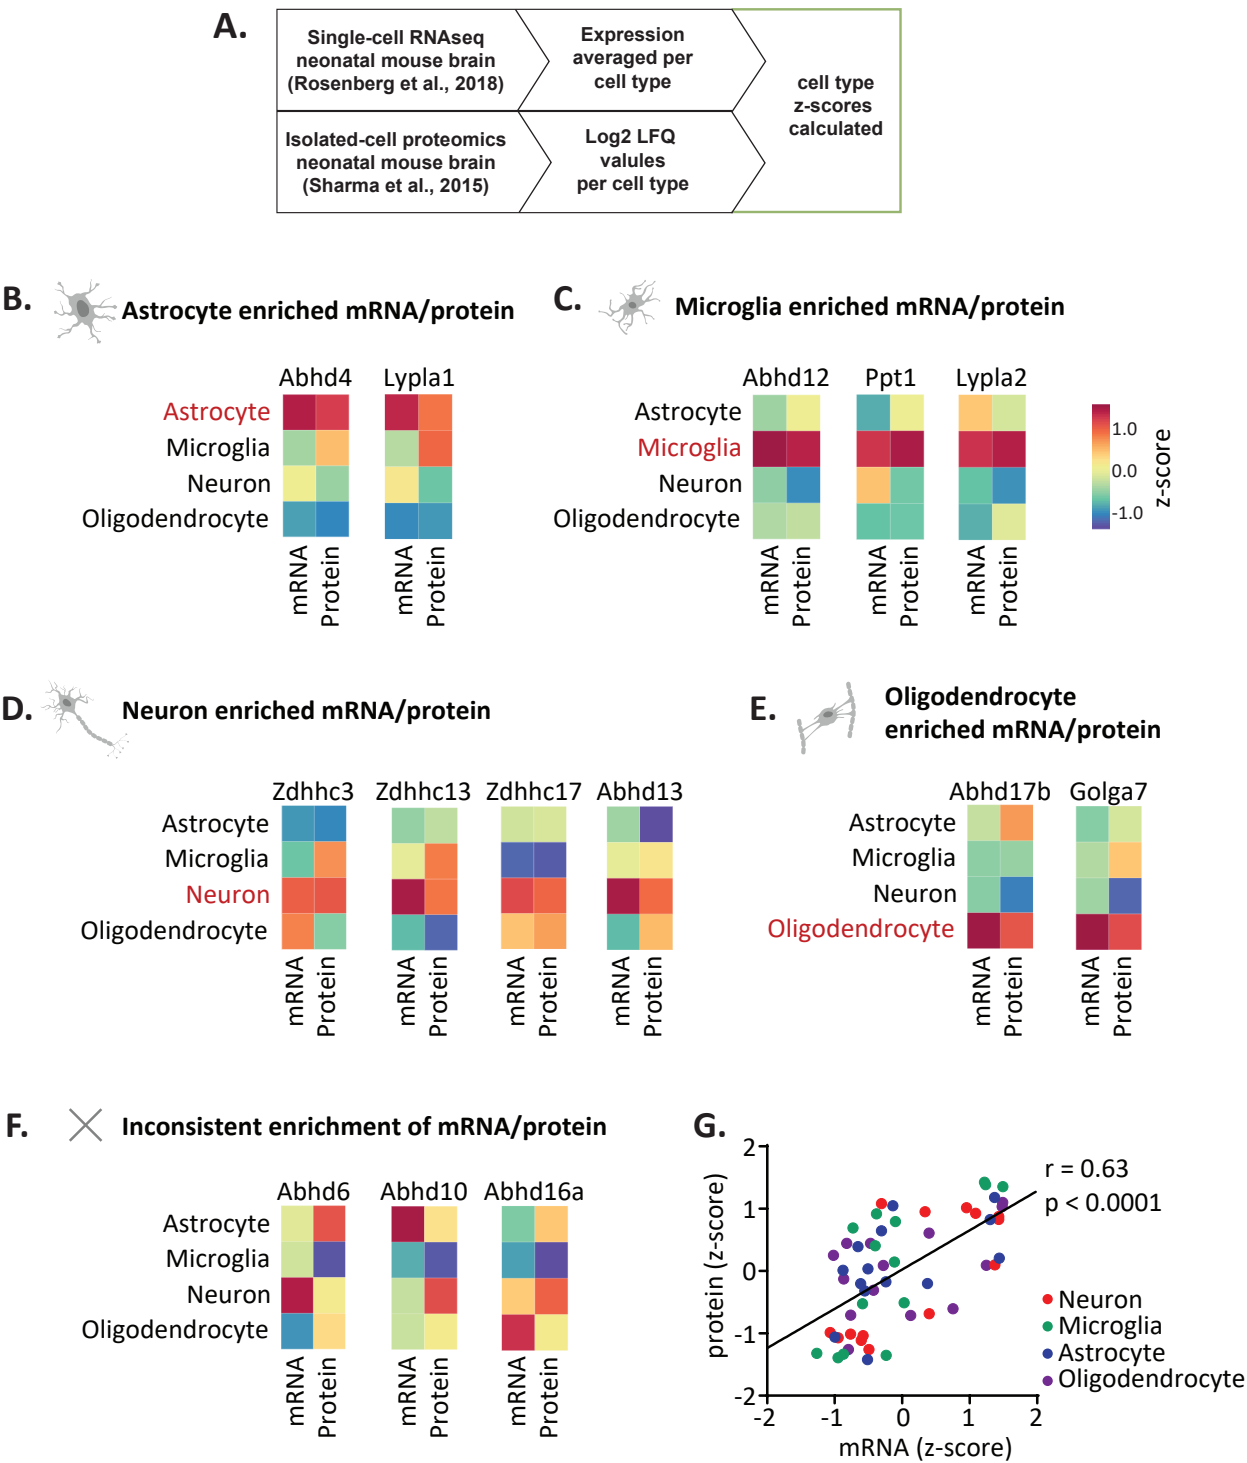

Supplement: supp [file elife-75804-supp-v1.zip › elife_poa_e75804_Figure_4_figure_supplement_3.pdf]

Figure 6-figure supplement 1

A.

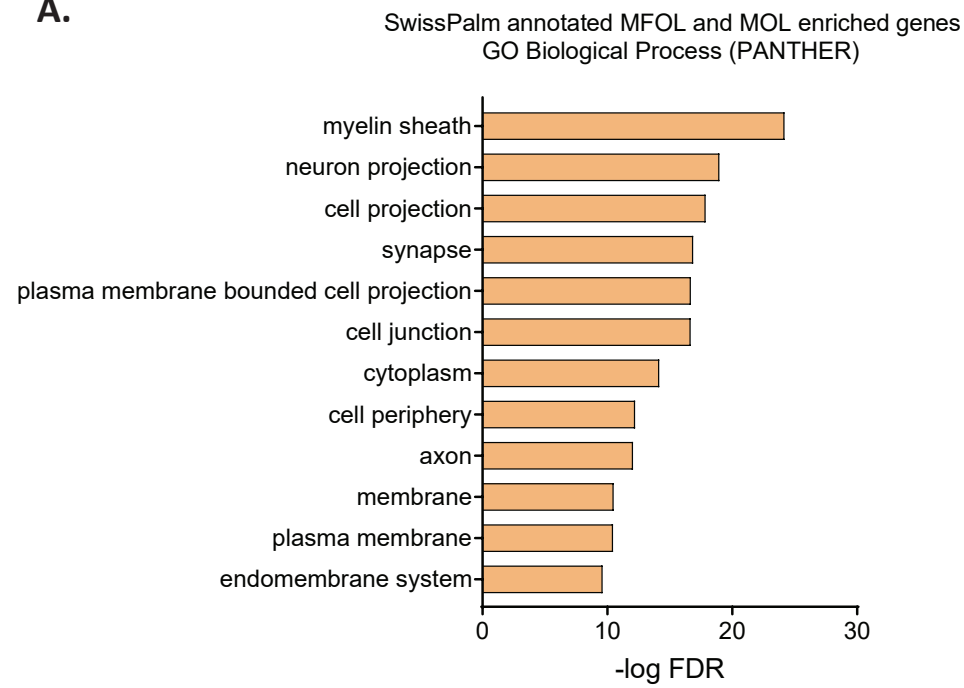

Supplement: supp [file elife-75804-supp-v1.zip › elife_poa_e75804_Figure_6_figure_supplement_1.pdf]

A

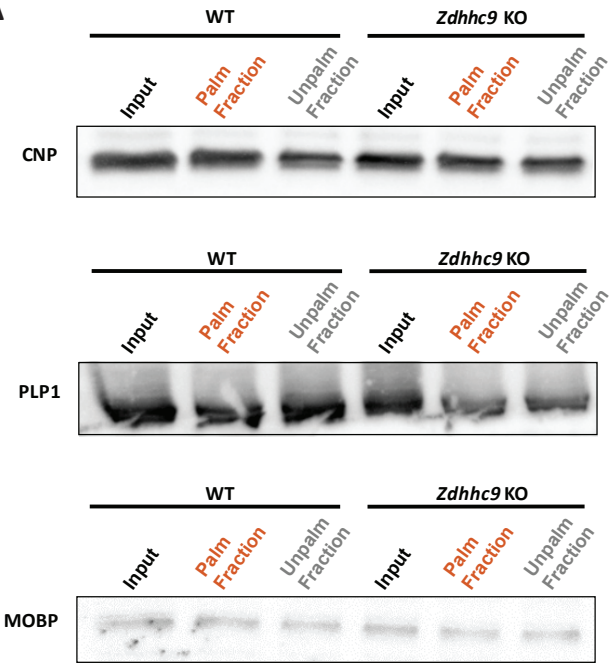

B

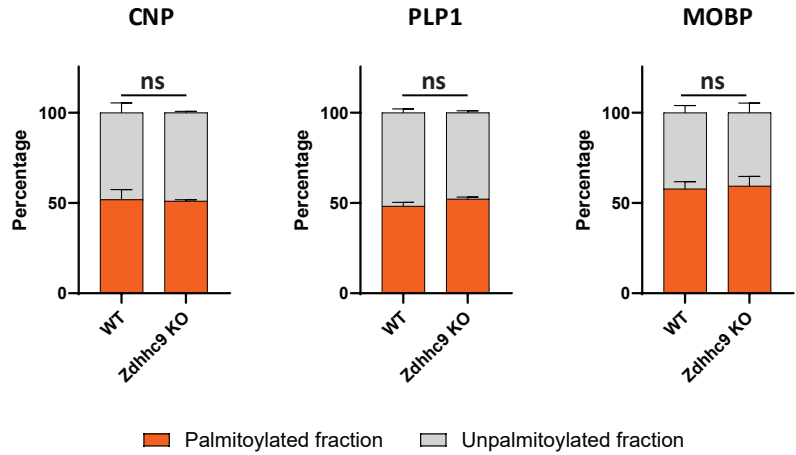

Supplement: supp [file elife-75804-supp-v1.zip › elife_poa_e75804_Figure_6_figure_supplement_2.pdf]

Figure 1-figure supplement 2

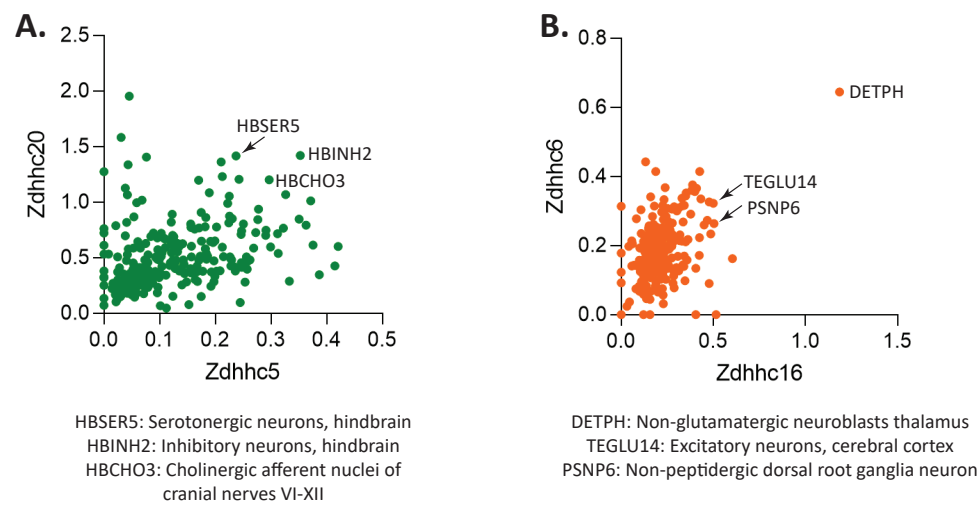

Supplement: supp [file elife_poa_e75804_Figure_1_figure_supplement_2.pdf › elife_poa_e75804_Figure_1_figure_supplement_2.pdf]
